# Supplementary material for: Royal jelly from different floral sources possesses distinct wound-healing mechanisms and ingredient profiles
Source: Royal Society of Chemistry journal article supplement (doi:10.1039/d1fo00586c), 2021-01-01
Supplement: d1fo00586c1.pdf [file d1fo00586c1.pdf]

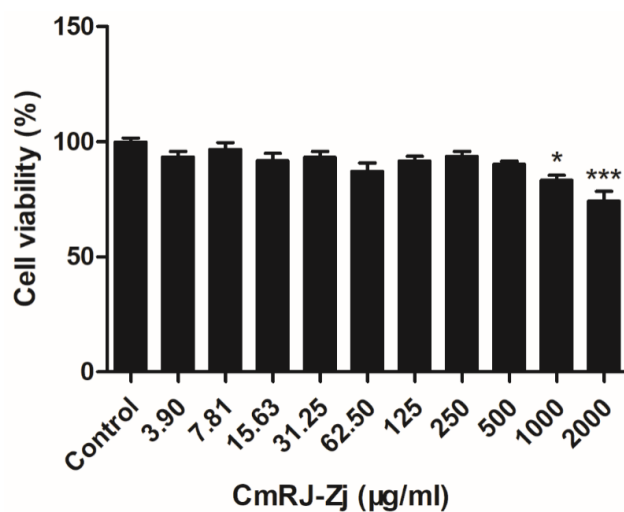

**Figure S1:** Proliferative effect of CmRJ-Zj on HaCaT cells after treatment for 24 h. \*,  $p < 0.05$ ; \*\*\*,  $p < 0.001$ , compared with control.
