# Supplementary material for: Royal jelly from different floral sources possesses distinct wound-healing mechanisms and ingredient profiles
Source: Royal Society of Chemistry journal article supplement (doi:10.1039/d1fo00586c), 2021-01-01
Supplement: d1fo00586c3.pdf [file d1fo00586c3.pdf]

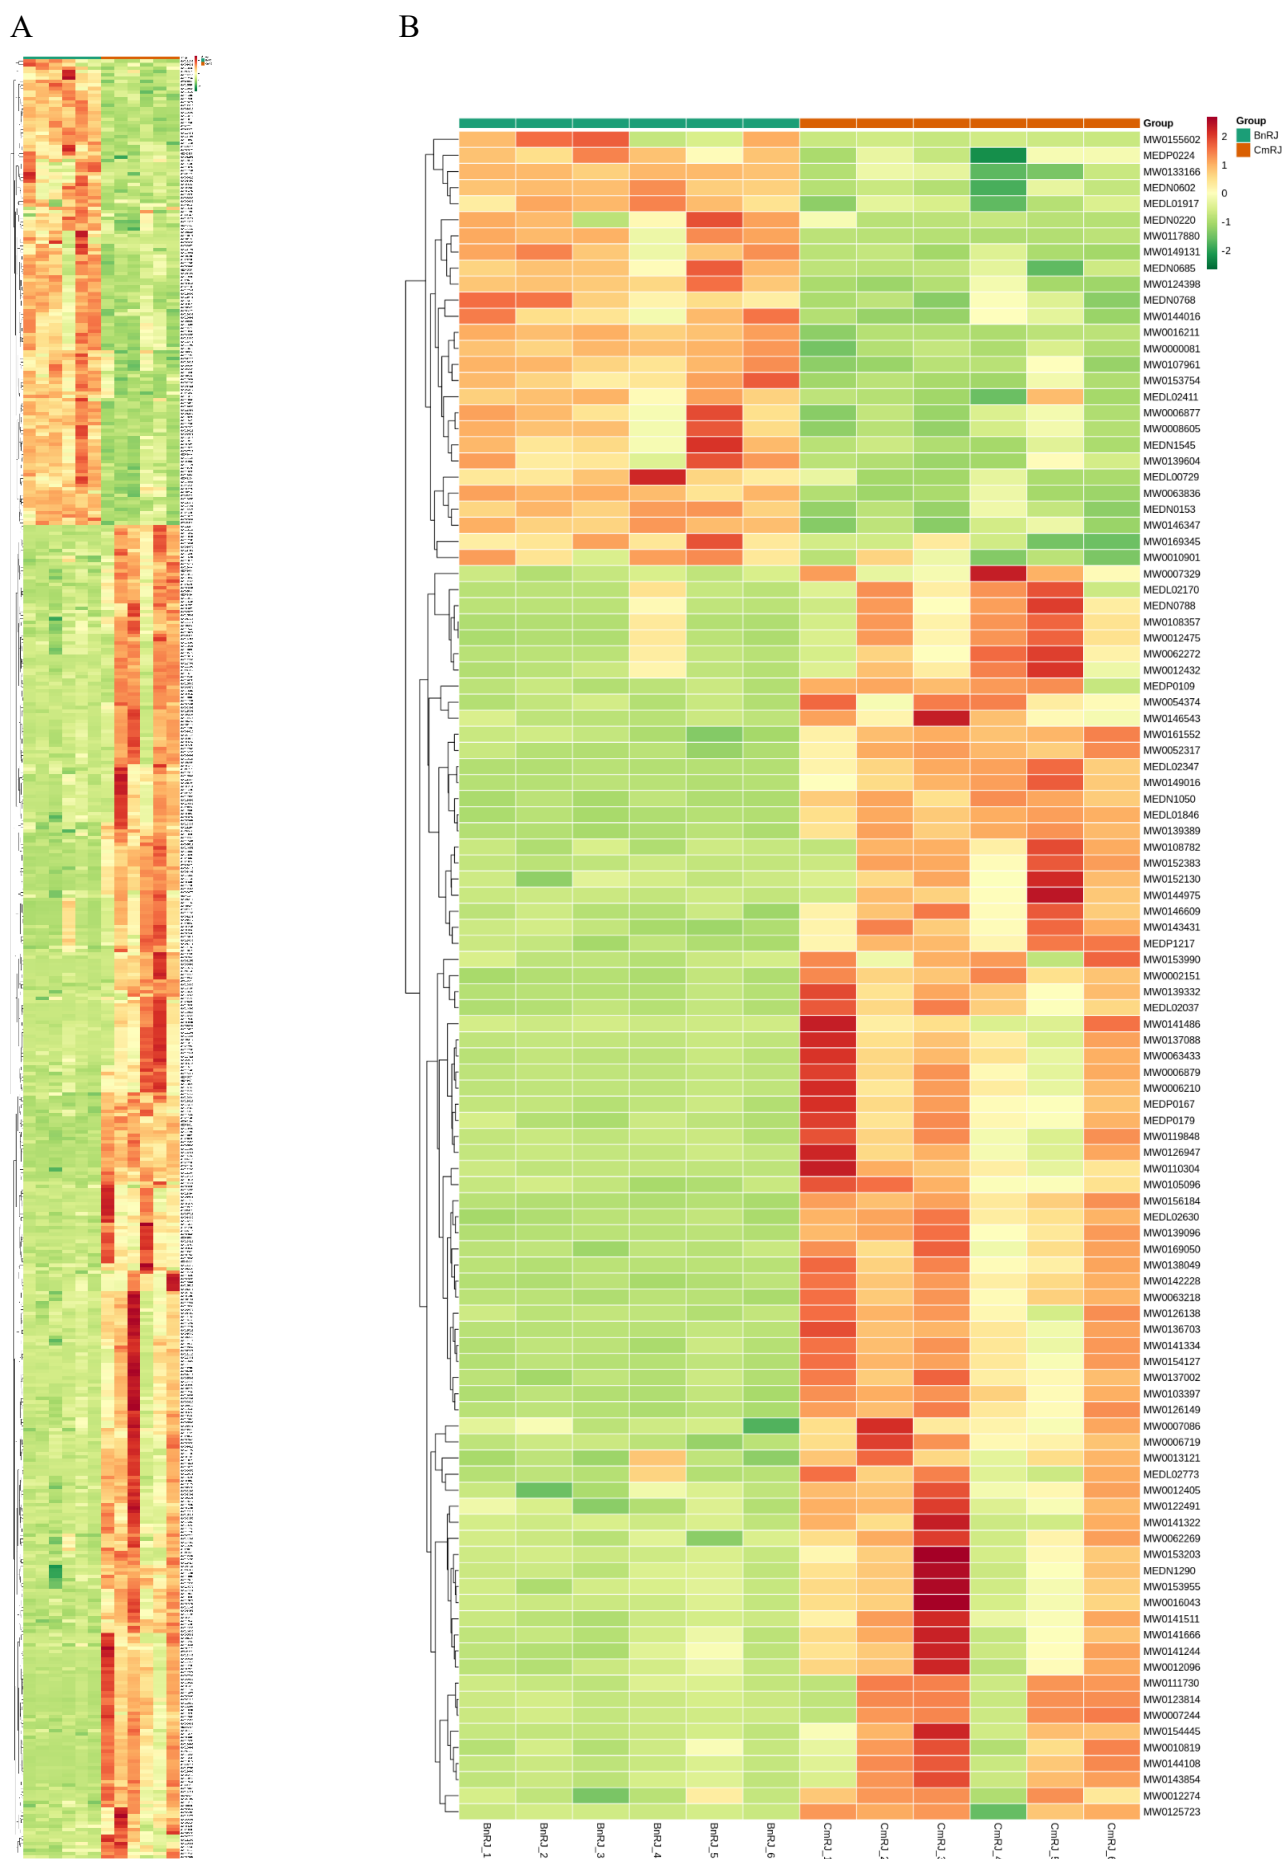

**Figure S3:** Heatmap of differential compounds between CmRJ-Zj and BnRJ-Zj in positive ion mode (A) and negative ion mode (B). The levels of changed compounds are shown in rows with red representing increase and green representing decrease, and separated samples are shown in columns.
