# Supplementary material for: Royal jelly from different floral sources possesses distinct wound-healing mechanisms and ingredient profiles
Source: Royal Society of Chemistry journal article supplement (doi:10.1039/d1fo00586c), 2021-01-01
Supplement: d1fo00586c4.xlsx [file d1fo00586c4.xlsx]

## Sheet: Sheet1
Table S1: Differentially expressed proteins in CmRJ-Zj and BnRJ-Zj
Protein accession	Protein description	CmRJ-Zj/BnRJ-Zj Ratio	CmRJ-Zj/BnRJ-Zj P value	Regulated Type	MW (kDa)	Coverage (%)	Peptides	Unique peptides	KEGG pathway	Biological Process	Cellular Component	Molecular Function	Domain description	KOG category	KOG NO.	KOG description
XP_016770898.2	polyubiquitin-A isoform X2 [Apis mellifera]	1000	0.001	Up	97.938	21.7	2	2	map03320 PPAR signaling pathway				Ubiquitin family	J	KOG0003	Ubiquitin/60s ribosomal protein L40 fusion
XP_006563422.1	chymotrypsin inhibitor [Apis mellifera]	1000	0.001	Up	8.1304	23.7	2	2			GO:0005576 extracellular region;		Trypsin Inhibitor like cysteine rich domain
XP_006565048.1	glucose dehydrogenase [FAD, quinone] isoform X2 [Apis mellifera]	1000	0.001	Up	63.242	4.3	2	2		GO:0002165 instar larval or pupal development; GO:0006629 lipid metabolic process; GO:0007275 multicellular organism development; GO:0008152 metabolic process; GO:0008202 steroid metabolic process; GO:0009791 post-embryonic development; GO:0009987 cellular process; GO:0010817 regulation of hormone levels; GO:0032501 multicellular organismal process; GO:0032502 developmental process; GO:0034754 ce…		GO:0003824 catalytic activity; GO:0016491 oxidoreductase activity;	GMC oxidoreductase; GMC oxidoreductase	E	KOG1238	Glucose dehydrogenase/choline dehydrogenase/mandelonitrile lyase (GMC oxidoreductase family)
XP_016766413.1	uncharacterized protein LOC726803 isoform X2 [Apis mellifera]	1000	0.001	Up	13.578	9.1	1	1
XP_022550336.1	uncharacterized protein LOC106378802 [Brassica napus]	1000	0.001	Up	27.698	5.5	1	1					Sulfotransferase domain
NP_001011598.1	alpha-amylase precursor [Apis mellifera]	2.9052	0.000853133	Up	55.947	46.2	15	15	map00500 Starch and sucrose metabolism; map01100 Metabolic pathways; map04972 Pancreatic secretion; map04973 Carbohydrate digestion and absorption	GO:0005975 carbohydrate metabolic process; GO:0008152 metabolic process; GO:0044238 primary metabolic process; GO:0071704 organic substance metabolic process;		GO:0003824 catalytic activity; GO:0004553 hydrolase activity, hydrolyzing O-glycosyl compounds; GO:0004556 alpha-amylase activity; GO:0005488 binding; GO:0005509 calcium ion binding; GO:0016160 amylase activity; GO:0016787 hydrolase activity; GO:0016798 hydrolase activity, acting on glycosyl bonds; GO:0043167 ion binding; GO:0043169 cation binding; GO:0046872 metal ion binding;	Alpha amylase, catalytic domain; Alpha amylase, C-terminal all-beta domain	G	KOG2212	Alpha-amylase
XP_006563421.1	chymotrypsin inhibitor-like [Apis mellifera]	2.8093	0.00869234	Up	8.0825	31.1	2	2					Trypsin Inhibitor like cysteine rich domain
XP_006562399.1	membrane metallo-endopeptidase-like 1 isoform X3 [Apis mellifera]	2.3283	0.028738	Up	84.87	17.9	11	11						E	KOG3624	M13 family peptidase
XP_001121077.2	chymotrypsin inhibitor [Apis mellifera]	2.1351	0.00593027	Up	9.3146	25.9	2	2			GO:0005576 extracellular region;		Trypsin Inhibitor like cysteine rich domain
XP_016771167.1	venom serine carboxypeptidase isoform X1 [Apis mellifera]	2.0986	0.00325438	Up	53.719	4.1	1	1		GO:0006403 RNA localization; GO:0006508 proteolysis; GO:0006807 nitrogen compound metabolic process; GO:0006810 transport; GO:0008152 metabolic process; GO:0009056 catabolic process; GO:0009057 macromolecule catabolic process; GO:0009987 cellular process; GO:0015931 nucleobase-containing compound transport; GO:0019538 protein metabolic process; GO:0030163 protein catabolic process; GO:0033036 mac…		GO:0003824 catalytic activity; GO:0004180 carboxypeptidase activity; GO:0004185 serine-type carboxypeptidase activity; GO:0008233 peptidase activity; GO:0008236 serine-type peptidase activity; GO:0008238 exopeptidase activity; GO:0016787 hydrolase activity; GO:0017171 serine hydrolase activity; GO:0070008 serine-type exopeptidase activity; GO:0070011 peptidase activity, acting on L-amino acid pep…	Serine carboxypeptidase	O	KOG1282	Serine carboxypeptidases (lysosomal cathepsin A)
NP_001011608.1	alpha-glucosidase precursor [Apis mellifera]	1.6146	0.0143095	Up	65.564	63.1	32	32	map00052 Galactose metabolism; map00500 Starch and sucrose metabolism; map01100 Metabolic pathways	GO:0000023 maltose metabolic process; GO:0005975 carbohydrate metabolic process; GO:0005984 disaccharide metabolic process; GO:0008152 metabolic process; GO:0009311 oligosaccharide metabolic process; GO:0009987 cellular process; GO:0044237 cellular metabolic process; GO:0044238 primary metabolic process; GO:0044262 cellular carbohydrate metabolic process; GO:0071704 organic substance metabolic pr…		GO:0003824 catalytic activity; GO:0004553 hydrolase activity, hydrolyzing O-glycosyl compounds; GO:0015926 glucosidase activity; GO:0016787 hydrolase activity; GO:0016798 hydrolase activity, acting on glycosyl bonds; GO:0032450 maltose alpha-glucosidase activity; GO:0090599 alpha-glucosidase activity;	Alpha amylase, catalytic domain	G	KOG0471	Alpha-amylase
NP_001011572.1	transferrin 1 precursor [Apis mellifera]	1.5616	0.00727612	Up	78.657	28.2	16	16		GO:0007610 behavior; GO:0007635 chemosensory behavior; GO:0009605 response to external stimulus; GO:0009607 response to biotic stimulus; GO:0009620 response to fungus; GO:0042048 olfactory behavior; GO:0042221 response to chemical; GO:0043207 response to external biotic stimulus; GO:0050896 response to stimulus; GO:0051704 multi-organism process; GO:0051707 response to other organism;			Transferrin
XP_016770111.1	nucleobindin-2 [Apis mellifera]	0.6117	0.0369889	Down	63.299	14.4	7	7		GO:0006950 response to stress; GO:0006952 defense response; GO:0009605 response to external stimulus; GO:0009607 response to biotic stimulus; GO:0009617 response to bacterium; GO:0042742 defense response to bacterium; GO:0043207 response to external biotic stimulus; GO:0050829 defense response to Gram-negative bacterium; GO:0050896 response to stimulus; GO:0051704 multi-organism process; GO:00517…	GO:0005622 intracellular; GO:0005623 cell; GO:0005737 cytoplasm; GO:0005794 Golgi apparatus; GO:0012505 endomembrane system; GO:0043226 organelle; GO:0043227 membrane-bounded organelle; GO:0043229 intracellular organelle; GO:0043231 intracellular membrane-bounded organelle;		EF-hand domain pair	S	KOG3866	DNA-binding protein of the nucleobindin family
XP_016770320.2	esterase B1 [Apis mellifera]	0.5389	0.00330281	Down	61.798	34.5	14	14	map00983 Drug metabolism - other enzymes				Carboxylesterase family	G	KOG1516	Carboxylesterase and related proteins
XP_026299326.1	venom dipeptidyl peptidase 4 isoform X1 [Apis mellifera]	0.4528	0.0127048	Down	88.009	8.5	5	5	map04974 Protein digestion and absorption	GO:0006508 proteolysis; GO:0006807 nitrogen compound metabolic process; GO:0008152 metabolic process; GO:0019538 protein metabolic process; GO:0043170 macromolecule metabolic process; GO:0044238 primary metabolic process; GO:0071704 organic substance metabolic process; GO:1901564 organonitrogen compound metabolic process;		GO:0003824 catalytic activity; GO:0004177 aminopeptidase activity; GO:0008233 peptidase activity; GO:0008238 exopeptidase activity; GO:0008239 dipeptidyl-peptidase activity; GO:0016787 hydrolase activity; GO:0070011 peptidase activity, acting on L-amino acid peptides; GO:0140096 catalytic activity, acting on a protein;	Prolyl oligopeptidase family	O	KOG2100	Dipeptidyl aminopeptidase
