# Supplementary material for: Royal jelly from different floral sources possesses distinct wound-healing mechanisms and ingredient profiles
Source: Royal Society of Chemistry journal article supplement (doi:10.1039/d1fo00586c), 2021-01-01
Supplement: d1fo00586c5.xlsx [file d1fo00586c5.xlsx]

## Sheet: Positive ion mode
Table S2: Compounds identified from CmRJ-Zj and BnRJ-Zj in positive ion mode
Index	Compounds	Formula	Precursor (g/mol)	Mass (g/mol)	Score	RT (min)	CAS_ID	HMDB_ID	cpd_ID	Metlin_ID	Pubchem.CID	Class.I	Class.II	CmRJ-Zj-1	CmRJ-Zj-2	CmRJ-Zj-3	CmRJ-Zj-4	CmRJ-Zj-5	CmRJ-Zj-6	BnRJ-Zj-1	BnRJ-Zj-2	BnRJ-Zj-3	BnRJ-Zj-4	BnRJ-Zj-5	BnRJ-Zj-6
MW0105657	Arg Gly Asp	C12H22N6O6	347.17	346.1601	0.5731	3.2534	99896-85-2	--	--	19218	104802	Organic acids and derivatives	Carboxylic acids and derivatives	30745.86	34824.19	56305.93	34746.58	39107.41	36328.61	33083.49	32789.41	31993.06	41942.69	41479.87	39733.92
MEDP0058	L-Saccharopine	C11H20N2O6	259.1282	276.1321	0.7677	6.0512	997-68-2	HMDB0000279	C00449	--	160556	Amino acid and Its metabolomics	Amino acids	40036.25	38057.47	43078.91	42826.48	45470.79	46726.9	52573.82	54536.89	53654.1	58458.98	59261.62	62755.05
MW0149111	Exserohilone	C20H22N2O6S2	489.055	450.0919	0.5401	0.0586	99572-22-2	--	C10593	--	355914	Organic acids and derivatives	Carboxylic acids and derivatives	6691.1	7543.93	8264.32	8189.07	2822.48	5996.22	6854.42	5388.72	5546.6	6361.82	6146.22	6874.04
MW0122884	Antibiotic K 252b	C26H19N3O5	517.1487	453.1325	0.6243	3.737	99570-78-2	--	--	--	9981344	Organoheterocyclic compounds	Indoles and derivatives	1318.69	3072.82	2918.58	2308.85	2543.9	2114.24	1652.04	2427.79	855.67	2330.7	1623.92	2300.93
MW0000938	[3-Ethoxy-4-(ethoxycarbonyl)phenyl]acetic acid	C13H16O5	217.0856	252.0998	0.6243	1.0472	99469-99-5	--	--	--	10131212	Benzenoids	Benzene and substituted derivatives	204.69	86.06	532.18	484.14	17.8	245.57	143.31	631.82	193.67	2263.91	119.64	124.27
MW0143619	5-Formyl-5,6,7,8-tetrahydromethanopterin;5-Formyl-H4MPT	C31H45N6O17P	868.2749	804.2579	0.6058	0.6145	99451-79-3	--	C01274	--	135398666	--	--	2099.18	1475.09	1599.65	1112.18	161.85	1674.05	4286.38	1867.63	2210.71	2879.53	2452.94	903.98
MW0157250	Stypandrol	C26H22O6	545.0159	430.1416	0.8579	0.659	99305-33-6	--	C09971	--	188516	Benzenoids	Naphthalenes	22884.09	25644.2	25036.82	23349.71	22630.59	27921.99	14046.03	12886.14	14173.4	16152.8	12007.61	15789.34
MW0011866	1,2-Didocosahexaenoyl-sn-glycero-3-phosphocholine	C52H80NO8P	900.5561	877.5622	0.8794	8.8217	99296-81-8	HMDB0008748	--	--	24779134	Lipids and lipid-like molecules	Glycerophospholipids	7937.59	4257.74	5198.51	6267.07	4694.58	5517.13	6017.47	7421.78	6935.88	8999.87	8162.97	5626.76
MW0114979	N-Demethylerythromycin	C36H65NO13	720.4515	719.4456	0.5918	8.1159	992-62-1	--	--	--	10010092	Organic oxygen compounds	Organooxygen compounds	4303.07	7796.58	9531.14	1114.34	4360.51	6681.34	2163.74	1987.6	2704.01	2786.26	3103.11	2165.35
MW0140157	(+/-)-2-(4'-Isobutylphenyl)propionitrile	C13H17N	397.2623	187.1361	0.5917	4.2847	99148-34-2	--	C04469	--	127247	--	--	1798.97	2728.2	2636.91	2037.55	2196.09	2616.8	747.23	1588.31	1036.18	1050.48	2892.12	1813.81
MW0005091	4-Hydroxybenzoic acid	C7H6O3	121.0283	138.0317	0.6539	9.6323	99-96-7	HMDB0000500	C00156	3263	135	Benzenoids	Benzene and substituted derivatives	11012.98	12188.62	11144.34	11807.71	11405.23	10272.13	12084.38	10795.68	12004.27	12023.12	10544.12	12151.26
MW0143277	4-Chloroacetophenone;p-Chloroacetophenone	C8H7ClO	347.0001	154.0185	0.642	0.8414	99-91-2	--	C06647	--	7467	Organic oxygen compounds	Organooxygen compounds	10603.14	19483.21	18582.41	15357.32	18628.55	9456.3	23851.84	25756.01	21098.72	29396.15	26452.34	22708.76
MEDL01894	Valproic acid	C8H16O2	145.1222	144.115	0.6698	6.9942	99-66-1	HMDB0001877	C07185	--	3121	Organic acids	Organic acids	11461.89	11353.16	12748.61	10509.02	11970.09	11108.42	14119.0	13782.19	14592.4	15004.02	16336.05	16359.26
MEDN0224	D-Trehalose	C12H22O11	361.1525	342.116	0.901	0.8665	99-20-7	HMDB0000975	C01083	--	7427	Carboxylic acids and derivatives	Sugars	224912.66	213006.38	256558.09	197399.95	184394.57	226460.96	150896.0	159227.67	133418.5	130881.39	128646.37	144901.96
MW0115164	Populin	C20H22O8	408.1655	390.1315	0.6666	3.8532	99-17-2	--	C10823	--	92735	Organic oxygen compounds	Organooxygen compounds	175774.95	237056.14	199956.83	234659.46	262388.8	227917.19	61958.73	60349.69	47704.66	58875.76	70617.78	63769.13
MEDN1476	Allantoic acid	C4H8N4O4	223.0637	176.0546	0.5673	11.8191	99-16-1	HMDB0001209	C00499	--	203	Amino acid and Its metabolomics	Amino acid derivatives	641585.92	1356338.31	1744016.27	1306357.04	572495.53	1228084.35	913837.59	1219929.62	1088174.62	642363.98	581774.22	1327913.13
MW0123674	Dihydroflavopereirine	C17H16N2	287.0933	248.1313	0.9609	4.7468	98890-48-3	--	--	--	10933868	Organoheterocyclic compounds	Quinolizines	14433.53	12888.77	15495.07	11705.27	17107.55	13681.21	17882.54	15623.36	13990.43	11144.85	12537.32	17161.35
MW0009655	Reboxetine	C19H23NO3	360.1809	313.1678	0.5083	9.3221	98769-81-4	HMDB0014379	D08472	--	127151	Benzenoids	Phenol ethers	126948.77	132392.64	127140.04	134919.6	124522.08	103065.73	129541.82	129448.1	133146.72	132789.46	130923.22	132438.31
MW0015406	9,10-Dihydrojasmonic acid	C12H20O3	235.1309	212.1412	0.6182	5.9016	98674-52-3	--	--	--	644120	Lipids and lipid-like molecules	Fatty Acyls	4398.43	5103.73	4784.03	3942.6	4453.66	7660.71	4084.61	3994.02	783.7	4751.39	5166.19	4389.73
MW0001617	1-Hydroxy-N-(4-methoxyphenyl)-2-naphthamide	C18H15NO3	338.0766	293.1052	0.6413	1.0837	98621-48-8	--	--	--	3515714	Benzenoids	Naphthalenes	1251.76	697.72	1944.87	1464.37	2128.71	1667.94	557.1	234.3	839.27	486.98	747.12	494.5
MW0123886	Ethaverine hydrochloride	C24H29NO4	396.2325	395.2097	0.5431	4.9683	985-13-7	--	D07926	44288	5702159	--	--	29283.6	35259.13	32494.62	28785.63	32080.02	33360.38	35316.26	36190.96	32712.29	30845.03	34475.47	33306.97
MW0109823	Tetramethyl 7,9-dimethyl-9aH-quinolizine-1,2,3,4-tetracarboxylate	C19H21NO8	800.2878	391.1267	0.6304	4.0126	983-36-8	--	--	--	101196	Organic acids and derivatives	Carboxylic acids and derivatives	579297.14	275357.05	326994.27	248116.77	83220.53	408658.46	31586.21	38220.58	37360.85	29321.22	51113.32	36475.75
MW0005843	7-(3-((2-((Phenylamino)carbonyl)hydrazino)methyl)-7-oxabicyclo(2.2.1)hept-2-yl)-5-heptenoic acid	C21H29N3O4	410.2051	387.2158	0.6482	3.7543	98299-61-7	--	--	43456	6437074	Benzenoids	Benzene and substituted derivatives	824.75	1955.6	2804.16	846.04	1698.99	2534.64	396.34	463.51	204.51	337.64	593.97	225.94
MW0146861	Brevetoxin A	C49H70O13	905.4453	866.4816	0.6312	4.2905	98112-41-5	--	C16839	--	10865808	Phenylpropanoids and polyketides	Brevetoxins and derivatives	6331.9	3266.26	3988.03	2067.57	768.09	3251.8	307.4	113.68	541.74	528.46	645.44	224.15
MW0123642	Difloxacin	C21H19F2N3O3	400.1467	399.1394	0.6476	1.9717	98106-17-3	--	C11234	--	56206	--	--	6028.86	4392.8	8842.66	850.06	2098.35	6818.42	555.2	622.01	331.71	679.66	805.7	459.84
MW0126515	Sarafloxacin	C20H17F2N3O3	809.2113	385.1238	0.6314	3.4795	98105-99-8	HMDB0039526	--	--	25273230	Organoheterocyclic compounds	Quinolines and derivatives	6222.19	2924.17	3203.49	9484.31	6678.74	3268.15	522.64	374.47	266.5	364.03	447.72	455.51
MW0124701	Lomefloxacin	C17H19F2N3O3	418.0928	351.1394	0.6471	4.2269	98079-51-7	HMDB0015113	C07078	1015	3948	Organoheterocyclic compounds	Quinolines and derivatives	4919.49	6899.2	7080.41	5588.79	7170.12	6260.76	6255.79	5728.54	5849.25	7190.2	6229.08	5775.73
MW0126295	Pyrazine-2-carboxylic acid	C5H4N2O2	125.0395	124.0273	0.579	1.2058	98-97-5	HMDB0059734	C19915	--	1047	Organoheterocyclic compounds	Diazines	30894.83	34010.35	30110.41	35102.75	36353.41	31186.18	33974.78	32761.84	33652.29	32796.68	36299.64	34842.23
MW0126293	Pyrazinamide	C5H5N3O	237.9188	123.0433	0.6115	0.6876	98-96-4	HMDB0014483	C01956	--	1046	Organoheterocyclic compounds	Diazines	2650.03	2152.25	2100.86	2979.4	2770.19	1413.17	1160.28	2250.36	1751.46	2651.6	957.89	1952.49
MEDL02050	Nicotinamide	C6H6N2O	123.0554	122.04799999999999	0.8377	1.5037	98-92-0	HMDB0001406	C00153	--	936	Others	Vitamin	136440.88	269382.47	279252.62	113256.89	235334.16	263390.28	148021.29	187322.93	169183.7	160556.25	215634.01	168489.31
MW0106221	Cyclohexanecarboxylic acid	C7H12O2	111.0804	128.0837	0.6489	4.8356	98-89-5	HMDB0031342	C09822	--	7413	Organic acids and derivatives	Carboxylic acids and derivatives	8221.56	7346.18	6615.05	7022.68	6779.43	7457.03	8243.84	7293.12	814.34	8451.51	7611.41	6945.73
MW0113853	Acetophenone	C8H8O	121.0646	120.0575	0.7016	11.7684	98-86-2	HMDB0033910	C07113	--	7410	Organic oxygen compounds	Organooxygen compounds	133003.94	103296.53	88839.19	144048.36	191022.91	113223.99	125084.28	142959.49	170721.69	127228.6	155885.41	116252.26
MW0006004	alpha-Methylstyrene	C9H10	119.0854	118.0783	0.7081	12.5948	98-83-9	HMDB0059899	C14395	--	7407	Benzenoids	Benzene and substituted derivatives	45026.46	94559.69	33465.35	108338.45	51816.18	51047.42	49486.92	46241.27	56507.23	43926.38	39951.67	52923.75
MW0155489	Phenylboronic acid;Benzeneboronic acid	C6H7BO2	285.0635	122.0539	0.6389	5.9467	98-80-6	--	C16200	--	66827	Benzenoids	Benzene and substituted derivatives	5872.12	8190.01	8794.67	7713.92	7403.44	8338.81	6936.72	5666.96	6162.88	7256.55	5660.91	5604.05
MEDN0017	D-Pyroglutamic acid	C5H7NO3	281.0787	129.0426	0.6205	0.8729	98-79-3	HMDB0000267	C01879	--	439685	Amino acid and Its metabolomics	Amino acid derivatives	3193.87	4177.04	7182.17	1950.95	682.24	3405.12	7227.61	8477.78	7083.87	13977.0	4369.67	6011.72
MEDP1242	4-tert-butylbenzoic acid	C11H14O2	143.0851	178.0994	0.6186	0.2511	98-73-7	-	C14535	--	7403	Benzene and substituted derivatives	Phenolic acids	13085.69	15794.84	13458.02	14095.5	15579.82	10590.25	11484.98	14503.94	14612.25	15723.06	15280.52	17060.64
ZINC1648266	Furfurol	C5H6O2	121.1009	98.101	0.5852	2.5746	98-00-0	HMDB0013742	C20441	--	7361	Organoheterocyclic compounds	Heteroaromatic compounds	3634.27	2400.01	2712.56	5378.24	5786.0	4574.85	6168.04	6222.09	5890.95	7316.2	6395.16	7384.98
MW0114573	Haploperoside E	C28H38O17	664.2438	646.2109	0.6048	0.6293	97938-29-9	--	--	--	21607628	Organic oxygen compounds	Organooxygen compounds	3780.65	3505.9	892.31	4005.21	4632.14	3170.85	6721.2	5409.83	6613.24	5534.31	6184.46	5534.37
MW0154391	N-Ethylmaleimide-S-glutathione	C16H22N4O8S	453.1058	430.1158	0.6372	0.5994	97908-43-5	--	C11370	--	443150	Organic acids and derivatives	Carboxylic acids and derivatives	79243.91	86858.6	80226.9	85765.78	84540.72	89304.16	103507.0	26743.35	114413.63	80697.99	101878.95	93403.28
MW0103657	S-(5'-Adenosyl)-L-homocysteine	C14H20N6O5S	403.1635	384.1216	0.7617	1.3292	979-92-0	HMDB0000939	C00021	296	439155	Nucleosides, nucleotides, and analogues	5'-deoxyribonucleosides	2375.57	5485.89	4158.55	3325.7	5396.34	4603.83	1730.02	1753.49	2109.5	1267.39	1357.21	1510.06
MW0054563	LysoPC(P-18:0)	C26H54NO6P	525.4018	507.3689	0.5926	11.4485	97802-55-6	HMDB0013122	--	--	24779527	Lipids and lipid-like molecules	Glycerophospholipids	924.1	1013.33	946.95	350.46	803.08	989.38	1286.34	748.33	274.36	818.68	838.25	464.93
MW0011789	1-(1Z-Hexadecenyl)-sn-glycero-3-phosphocholine	C24H50NO6P	480.3522	479.3376	0.5864	9.1743	97802-53-4	HMDB0010407	--	--	10917802	Lipids and lipid-like molecules	Glycerophospholipids	29210.48	29860.03	25933.94	35004.82	30144.16	31004.04	34667.67	32266.78	31789.81	30378.43	32673.73	30916.38
MW0126376	Quinelorane	C14H22N4	510.4022	246.1844	0.613	11.1553	97466-90-5	--	--	--	57242	Organoheterocyclic compounds	Diazanaphthalenes	10711.06	12760.84	6780.0	10907.52	10625.44	7805.52	9082.0	13335.28	13355.2	17344.67	12814.61	9069.68
MW0125284	N-(1-Benzyl-4-piperidinyl)-2,2,2-trifluoroacetamide	C14H17F3N2O	287.1343	286.1293	0.9818	0.5687	97181-50-5	--	--	--	1531300	Organoheterocyclic compounds	Piperidines	30285.83	32817.91	32452.08	30648.99	26235.16	26819.44	29308.56	31345.9	31852.3	31012.58	36458.1	32363.92
MW0116518	1-(Piperidin-2-yl)propan-1-one	C8H15NO	321.1909	141.1154	0.5682	3.7836	97073-23-9	HMDB0033364	--	--	426124	Organoheterocyclic compounds	Piperidines	14835.25	20015.34	22065.22	11998.76	17485.53	21243.96	23440.72	23906.38	26873.95	30182.12	25807.48	24598.29
MW0127753	(+)-Gallocatechin	C15H14O7	353.0868	306.074	0.6483	6.084	970-73-0	HMDB0038365	C12127	--	65084	Phenylpropanoids and polyketides	Flavonoids	4072.05	4366.92	3995.51	4131.19	4340.7	4261.1	3809.83	4065.61	3920.57	3827.94	2490.66	4601.98
MEDP0525	N-Acetyl-L-alanine	C5H9NO3	132.0655	131.0582	0.6743	1.1475	97-69-8	HMDB0000766	-	--	88064	Amino acid and Its metabolomics	Amino acid derivatives	3366.17	6393.54	5676.43	9409.15	10903.02	6491.72	23342.62	21585.8	18244.8	6786.76	24090.42	22855.36
MW0103874	(2S)-2-Hydroxybutanedioic acid	C4H6O5	286.0755	134.0215	0.5973	5.8271	97-67-6	HMDB0000156	C00149	45931	222656	Organic acids and derivatives	Hydroxy acids and derivatives	4930.59	4119.94	4802.43	17077.21	9792.35	3103.6	5831.02	9455.31	1054.58	8487.8	6480.56	5715.47
MEDP0843	Ethyl isobutyrate	C6H12O2	81.0698	116.0837	0.6498	3.8801	97-62-1	HMDB0031248	-	--	7342	Aldehyde,Ketones,Esters	Esters	18030.26	13859.96	13383.5	19229.94	16732.06	17987.38	34462.17	10288.18	2050.43	11247.2	11552.39	11823.21
ZINC1843030	D00121	C4H6N4O3	334.2674	158.11700000000002	0.6079	5.7451	97-59-6	-	C01551	--	439713	Organoheterocyclic compounds	Azolidines	10098.85	8656.86	10217.67	9891.99	10673.98	10897.45	7916.97	8108.71	7132.0	10631.13	10760.43	8560.41
MEDL02156	2-Methoxy-4-[(E)-prop-1-enyl]phenol	C10H12O2	182.1173	164.0837	0.5527	5.1307	97-54-1	HMDB0005802	C10469	--	853433	Phenolic acids	Phenolic acids	6538.38	10344.89	7823.01	14764.86	15338.77	8618.11	12969.47	13860.99	12739.56	9670.45	18272.62	14836.74
MW0005934	Acetarsol	C8H10AsNO5	567.9906	274.9775	0.5579999999999999	0.5587	97-44-9	--	D07110	43583	1985	Benzenoids	Benzene and substituted derivatives	1627.75	3918.31	4864.79	3219.35	3201.25	3971.08	2479.09	2516.35	1728.27	660.26	1538.08	2758.8
MW0016414	Carvyl acetate	C12H18O2	159.1168	194.1307	0.5802	5.4204	97-42-7	HMDB0038046	--	--	7335	Lipids and lipid-like molecules	Prenol lipids	6475.5	5769.26	5549.71	5989.62	5878.98	6660.72	6567.93	7026.68	6555.34	8530.66	7917.24	6588.94
MW0168856	BITHIONOL	C12H6Cl4O2S	417.8988	353.8843	0.562	0.6889	97-18-7	--	C07967	43584	2406	--	--	2273.49	2205.54	2087.97	404.86	2732.3	2667.12	1554.54	925.36	162.26	2117.16	680.35	953.21
MW0001547	1-Chloro-2,4-dinitrobenzene	C6H3ClN2O4	404.9634	201.9781	0.6437	0.6743	97-00-7	--	C14397	--	6	Benzenoids	Benzene and substituted derivatives	2618.23	2379.59	2199.24	4055.19	3515.44	3860.75	2141.91	2872.86	2159.38	3010.87	1416.93	2540.98
MW0001361	1,4-Bis[(p-hydroxyphenethyl)amino]anthraquinone	C30H26N2O4	523.1612	478.1893	0.863	0.6281	96969-83-4	--	--	--	2817242	Benzenoids	Anthracenes	7139.16	6125.95	5474.09	9967.77	8842.0	6592.43	5249.9	5694.05	5915.18	5425.01	6691.07	4808.07
MW0012746	19-Oxoandrost-4-ene-3,17-dione;19-Oxoandrostenedione	C19H24O3	347.2029	392.166	0.5807	7.574	968-49-0	HMDB0006768	C05297	--	92854	Lipids and lipid-like molecules	Steroids and steroid derivatives	399.04	888.26	2134.15	100.56	1557.43	1080.65	421.08	70.51	432.31	448.11	160.23	37.14
MW0106578	Ectoine	C6H10N2O2	187.0447	142.0742	0.5847	0.5653	96702-03-3	--	C06231	--	126041	--	--	7940.11	5621.36	7409.34	6197.13	4358.4	7478.38	5957.13	6289.05	5130.78	6366.53	2360.69	6767.85
MW0131297	3-(4-Bromophenyl)-7-hydroxy-4H-chromen-4-one	C15H9BrO3	354.9365	315.9735	0.6346	0.3683	96644-05-2	--	--	--	5398367	Phenylpropanoids and polyketides	Isoflavonoids	1523.04	822.93	710.09	1125.58	628.23	513.47	441.08	647.78	609.61	891.52	527.73	645.12
MW0156544	Sarothralin	C31H34O8	557.2143	534.2254	0.6263	10.0603	96624-40-7	--	C09969	--	354448	Benzenoids	Benzene and substituted derivatives	845.24	1246.25	750.82	1426.14	1945.56	634.4	1685.24	1862.54	2116.72	1807.22	916.51	1699.14
MW0125942	Ocinaplon	C17H11N5O	343.1299	301.0964	0.6263	3.2593	96604-21-6	--	--	--	216456	Organoheterocyclic compounds	Pyrazolopyrimidines	5728.19	2920.87	1378.83	5709.16	4652.16	2763.03	5601.96	6481.49	1820.41	9597.16	5838.55	6563.73
MW0139633	Salvianolic acid A	C26H22O10	495.1255	494.1213	0.5309	7.6322	96574-01-5	--	C10492	--	5281793	Phenylpropanoids and polyketides	Stilbenes	3460.71	2911.81	1768.91	4457.75	4149.62	2857.06	8368.82	4814.21	6248.42	4529.17	5809.03	5536.67
MW0117456	2-(2H-1,2,3-Benzotriazol-2-yl)-4-(2-hydroxyethyl)phenol	C14H13N3O2	533.1901	255.1008	0.6081	0.2951	96549-95-0	--	--	--	688251	Organoheterocyclic compounds	Azoles	1244.13	1080.75	1069.99	1138.84	1092.81	1459.52	1984.46	1423.57	1218.81	598.65	1851.46	1728.68
MW0009611	Pyridaben	C19H25ClN2OS	365.13599999999997	364.1376	0.7018	9.749	96489-71-3	--	C18614	72412	91754	Benzenoids	Benzene and substituted derivatives	181199.93	158447.81	61230.79	148211.25	173157.91	158330.35	231895.4	37972.52	234538.05	239682.59	241848.45	271993.77
MW0118135	2-[3-(2H-1,2,3-Benzotriazol-2-yl)-4-hydroxyphenyl]ethyl 2-methylacrylate	C18H17N3O3	365.161	323.127	0.6306	7.4842	96478-09-0	--	--	--	726893	Organoheterocyclic compounds	Azoles	1835.64	1178.86	1628.81	2069.52	1072.79	1137.03	2567.98	3144.06	3079.17	2088.34	2508.5	2802.26
MW0108330	Microcystin LA	C46H67N7O12	951.5167	909.4848	0.5898	3.6071	96180-79-9	--	--	--	6437382	Organic acids and derivatives	Peptidomimetics	703.7	238.89	341.9	1037.55	1465.78	286.48	2351.68	1574.54	185.03	1469.51	2628.08	2373.64
MW0002216	2,4,6-Tri-tert-butylaniline	C18H31N	561.456	261.2456	0.5703	10.8223	961-38-6	--	--	--	70402	Benzenoids	Benzene and substituted derivatives	1052.0	1782.66	2530.18	207.48	494.62	1063.31	304.41	238.26	422.03	92.27	398.39	259.99
MW0103343	2'-Deoxyguanosine	C10H13N5O4	802.2969	267.0968	0.9877	1.7983	961-07-9	HMDB0000085	C00330	--	135398592	Nucleosides, nucleotides, and analogues	Purine nucleosides	25070.06	23107.52	28257.51	23760.53	22521.93	21649.29	4792.3	9909.72	6254.7	6933.01	8293.92	5648.16
MW0114980	N-Desethylamiodarone	C23H25I2NO3	655.9555	616.9924	0.6485	0.5388	96027-74-6	HMDB0060528	--	64893	178801	--	--	726.88	938.72	956.35	160.65	1466.96	1305.14	1208.74	1222.73	1485.07	1277.54	915.8	307.54
MW0112221	2-Methylbutyraldehyde	C5H10O	196.1412	86.0732	0.9199	5.4119	96-17-3	HMDB0031526	C02223	--	7284	Organic oxygen compounds	Organooxygen compounds	14807.88	14303.61	13797.02	13417.98	13390.07	14438.02	14094.2	15423.18	14661.19	12945.95	16904.77	14747.43
MW0156204	Pterostilbene Phosphate	C16H17O6P	359.0654	336.0763	0.6378	11.8178	959699-21-9	--	--	263501	--	--	--	33415.92	23205.33	46631.19	39487.76	31710.96	35744.08	33403.65	26405.26	34634.66	29799.6	25754.69	29733.81
MW0117281	1-Piperidinecarboxamide, N-phenyl-4-(3-quinolinylmethyl)-	C22H23N3O	346.1861	345.1841	0.5589	3.3485	959151-50-9	--	--	45298	25154868	Organoheterocyclic compounds	Quinolines and derivatives	1946.79	3227.2	4155.61	1547.43	2593.72	3586.11	1572.92	2957.74	2986.82	1365.46	1810.85	2332.36
MW0111378	(1R)-2alpha-[4'-(3-Phenylureido)-4-biphenylylcarbonyl]cyclopentane-1beta-carboxylic acid	C26H24N2O4	429.17800000000005	428.1736	0.7099	4.9829	959122-11-3	--	--	64728	24768261	Organic oxygen compounds	Organooxygen compounds	133433.28	147905.26	139010.74	144435.3	138588.86	135318.89	116075.17	111992.66	114412.04	120023.39	120100.59	113103.48
MW0012940	1-Oleoyl-2-myristoyl-sn-glycero-3-phosphocholine	C40H78NO8P	732.5469	731.5465	0.5577	10.0467	95896-56-3	HMDB0008097	--	--	24778931	Lipids and lipid-like molecules	Glycerophospholipids	77393.65	81747.88	79767.01	85679.95	82523.29	71191.19	81234.96	76606.6	78337.16	76155.55	82260.08	78489.16
MW0001799	2-(2-Naphthyl)-1,3-benzoxazol-5-amine	C17H12N2O	538.2246	260.095	0.6041	4.3113	95888-12-3	--	--	--	736012	Benzenoids	Naphthalenes	91978.17	34935.74	44409.23	35607.93	10063.61	50067.22	4393.84	4317.79	4205.66	3826.58	5293.23	4075.9
MW0117949	2,4-Thiazolidinedione, 5-[[4-(4-pyridinyl)-6-quinolinyl]methylene]-, (5Z)-	C18H11N3O2S	372.0209	333.0572	0.6115	0.5538	958852-01-2	--	--	--	23582824	Organoheterocyclic compounds	Pyridines and derivatives	1458.51	2913.0	1859.06	2466.44	1768.15	1804.79	1498.09	2098.81	1149.02	1769.15	2701.27	2188.63
MEDN0422	2'-Deoxyadenosine	C10H13N5O3	269.1385	251.102	0.5858	3.1833	958-09-8	HMDB0000101	C00559	--	13730	Nucleotide And Its metabolomics	Nucleotide and Its metabolomics	18087.51	35592.38	56213.24	20886.84	38642.84	34974.05	28639.32	26900.69	25977.45	15602.72	35666.98	16322.44
MW0154352	Nedaplatin	C2H8N2O3Pt	345.05199999999996	303.0183	0.8958	0.5541	95734-82-0	--	C12862	--	6917890	Organic acids and derivatives	Hydroxy acids and derivatives	28203.19	25109.38	28157.32	26964.3	27692.64	29182.91	25290.2	23576.41	24791.85	24170.08	27280.74	24208.78
MW0009000	N-Cyclopropyl 2-bromo-4-trifluoromethoxybenzenesulfonamide	C10H9BrF3NO3S	718.8959	358.9439	0.613	0.6891	957062-79-2	--	--	--	26985678	Benzenoids	Benzene and substituted derivatives	2341.73	2963.49	55.84	5670.81	5207.88	544.06	7905.73	5527.71	4835.28	5680.74	7188.18	5566.09
MW0009652	Ranolazine	C24H33N3O4	428.249	427.2471	0.5596	3.2578	95635-55-5	HMDB0014388	D05700	--	56959	Benzenoids	Phenol ethers	8126.11	9847.27	14803.73	9343.96	9859.76	6104.18	9133.9	8052.19	7475.44	9013.23	9879.08	9016.58
MW0003745	3-[(4-Chloro-3,5-dimethyl-1H-pyrazol-1-yl)methyl]-4-methoxybenzoic acid	C14H15ClN2O3	589.1616	294.0771	0.6463	2.123	956204-52-7	--	--	--	4715107	Benzenoids	Benzene and substituted derivatives	2220.64	2127.36	1420.67	2410.33	2232.1	2000.49	2951.37	2799.88	3328.2	3768.79	3587.51	2914.03
MW0143282	4-Chlorochalcone;3-(4-Chlorophenyl)-1-phenyl-2-propen-1-one	C15H11ClO	284.079	242.0498	0.5286	4.9757	956-04-7	--	C14585	--	5377022	Phenylpropanoids and polyketides	Linear 1,3-diarylpropanoids	41815.6	42490.4	43169.05	42577.27	43414.7	44536.05	38019.77	37234.38	39217.8	34423.41	34566.19	40676.82
MW0106183	Corynebactin	C39H42N6O18	946.2707	882.2556	0.627	0.9431	95536-04-2	--	C12219	--	125349	Organic acids and derivatives	Peptidomimetics	26546.8	39887.76	28620.73	35663.69	42213.32	18896.12	8724.51	8629.62	9596.93	6318.64	6628.33	13410.51
MW0117445	2-(2-Chlorophenyl)-4-methyl-5-(pyridin-2-ylmethyl)-1H-pyrazolo[4,3-c]pyridine-3,6(2H,5H)-dione	C19H15ClN4O2	443.0076	366.0884	0.6409999999999999	0.9118	955272-06-7	--	--	--	17027464	Organoheterocyclic compounds	Azoles	4837.89	4139.65	3389.24	4167.73	4073.94	4172.2	6258.85	4904.51	6417.03	5963.83	7780.98	5785.08
MW0103767	5-Bromo-2-(furan-2-ylmethylamino)-3-nitropyridine	C10H8BrN3O3	343.9877	296.9749	0.6497	0.5539	954216-03-6	--	--	--	24903360	Organic 1,3-dipolar compounds	Allyl-type 1,3-dipolar organic compounds	5975.22	3443.7	6575.4	3471.52	4245.55	6536.9	1349.96	3836.9	3644.11	2959.84	4160.25	1689.87
MW0110037	Trinexapac-ethyl	C13H16O5	294.1378	252.0998	0.6508	6.0676	95266-40-3	--	C18541	--	92421	Organic acids and derivatives	Vinylogous acids	7306.23	8028.53	6719.29	8920.17	8327.93	9712.48	8921.97	8721.99	9091.05	9972.77	11608.43	9511.65
MW0006094	Atovaquone	C22H19ClO3	408.1364	366.1023	0.6284	3.0526	95233-18-4	HMDB0015249	C06835	--	74989	Benzenoids	Naphthalenes	2048.71	2325.67	1728.85	2071.19	2523.26	2676.4	3249.26	2832.09	2780.74	3035.09	2681.85	2990.16
MW0008519	N-(Furan-2-ylmethyl) 3-bromo-5-trifluoromethylbenzenesulfonamide	C12H9BrF3NO3S	497.8204	382.9439	0.5547	9.9268	951884-84-7	--	--	--	26986220	Benzenoids	Benzene and substituted derivatives	744.26	2045.3	3602.11	344.15	1646.16	1960.27	146.52	360.99	94.89	367.89	354.22	288.77
MW0001104	1-(3-Bromo-5-trifluoromethylphenylsulfonyl)piperidine	C12H13BrF3NO2S	742.9682	370.9802	0.6303	0.6675	951884-69-8	--	--	--	26986229	Benzenoids	Benzene and substituted derivatives	8085.33	10891.1	10558.06	9525.34	10478.92	11987.47	4191.63	4140.02	1191.3	4353.05	2400.99	4252.58
MW0002824	2-Bromo-N-hexylbenzenesulfonamide	C12H18BrNO2S	677.0108	319.0242	0.6147	0.5541	951883-96-8	--	--	--	16060181	Benzenoids	Benzene and substituted derivatives	1825.73	1620.11	3028.51	341.61	2436.38	1102.56	249.33	1959.53	670.23	706.35	1653.34	2171.48
MW0002825	2-Bromo-N-isopropylbenzenesulfonamide	C9H12BrNO2S	323.9904	276.9772	0.6208	0.6059	951883-94-6	--	--	--	7937971	Benzenoids	Benzene and substituted derivatives	7993.76	5678.77	5721.61	5374.73	5451.52	6160.13	4456.06	3202.36	3731.05	4969.73	6467.03	2667.97
MW0002306	2,5-Bis(trifluoromethyl)benzenesulfonamide	C8H5F6NO2S	311.0284	292.9945	0.6496	0.5356	951625-11-9	--	--	--	28306200	Benzenoids	Benzene and substituted derivatives	3193.36	519.62	2307.2	3260.05	2081.16	92.54	1497.07	225.66	1710.66	958.3	2902.99	2097.21
MW0002764	2-Bromo-4,6-difluorobenzenesulfonamide	C6H4BrF2NO2S	317.92400000000004	270.9114	0.6318	0.6812	951624-79-6	--	--	--	16793741	Benzenoids	Benzene and substituted derivatives	9691.26	11078.14	9958.07	7889.27	8576.15	9395.17	4201.81	5014.53	3856.66	5287.68	2042.04	5142.42
MW0109081	Perindoprilat	C17H28N2O5	305.1858	340.1998	0.6374	4.4481	95153-31-4	HMDB0060574	C21517	--	72022	Organic acids and derivatives	Carboxylic acids and derivatives	1552.46	1365.37	2072.06	293.17	1023.97	1542.51	605.31	1080.96	157.86	488.42	716.48	629.93
MEDN0141	2'-Deoxyuridine	C9H12N2O5	211.0715	228.075	0.5686	2.286	951-78-0	HMDB0000012	C00526	--	13712	Nucleotide And Its metabolomics	Nucleotide and Its metabolomics	1230.16	1474.82	448.11	1832.96	865.87	1142.91	976.98	1150.7	2069.13	2622.1	1818.84	1182.56
MW0103337	2'-Deoxycytidine	C9H13N3O4	472.2141	227.0906	0.5819	4.9683	951-77-9	HMDB0000014	C00881	--	13711	Nucleosides, nucleotides, and analogues	Pyrimidine nucleosides	14283.96	24341.69	20356.41	21133.23	25341.41	20921.21	26056.42	30296.64	27654.47	26050.83	22810.72	28611.21
MW0103837	(2E)-4-Hydroxynon-2-enoic acid	C9H16O3	155.1067	172.1099	0.9443	4.5818	95087-42-6	--	--	--	10442150	Organic acids and derivatives	Hydroxy acids and derivatives	57517.43	63319.16	52331.97	60792.95	66021.49	66212.69	84495.98	85094.11	80246.32	96034.53	95199.14	81968.97
MW0141081	1,2,4,5-Tetramethylbenzene;Durene	C10H14	157.101	134.1096	0.7256	13.6113	95-93-2	--	C14534	--	7269	Benzenoids	Benzene and substituted derivatives	14399.52	3397.57	2648.74	2661.07	3287.87	4990.64	2844.44	2389.74	2292.07	2413.91	3524.88	5124.93
MW0142527	2'-O-Methylodoratol;Methylodoratol	C18H20O5	655.2517	316.1311	0.6399	4.2529	94943-13-2	--	C09774	--	442421	Phenylpropanoids and polyketides	Linear 1,3-diarylpropanoids	199.01	1020.74	1878.82	873.08	293.43	771.68	208.45	1106.34	221.96	680.47	853.57	294.29
MEDP1238	Coniferyl acetate	C12H14O4	224.0975	222.0892	0.8637	4.8503	94930-81-1	-	C20225	--	12835430	Aldehyde,Ketones,Esters	Esters	42973.92	45407.5	47605.84	44825.35	45355.99	48712.33	41264.93	40914.92	43990.95	46992.78	45709.97	42084.64
MW0118383	2-Chloro-3-(2-chloroethyl)-6-bromoquinoline	C11H8BrCl2N	644.8089	302.9217	0.5469	3.3161	948294-46-0	--	--	--	17039758	Organoheterocyclic compounds	Quinolines and derivatives	6873.83	4918.05	3122.61	7386.0	2900.54	4315.76	6187.77	6566.26	6399.92	7772.53	11297.66	6772.93
MW0006485	Carbamic acid, N-methyl-N-[[3-(4-pyridinyl)phenyl]methyl]-, 4'-(aminocarbonyl)[1,1'-biphenyl]-4-yl ester	C27H23N3O3	438.1812	437.1739	0.8952	1.0397	947669-91-2	--	--	45314	17759121	Benzenoids	Benzene and substituted derivatives	24340.66	24649.38	34591.17	16286.67	18901.21	24479.69	12012.18	10938.04	14085.09	16836.72	14840.97	12197.21
MW0116324	1-(2-Fluoroethyl)piperidin-4-ylamine	C7H15FN2	293.2522	146.1219	0.5733	2.9216	947263-70-9	--	--	--	16748092	Organoheterocyclic compounds	Piperidines	1300.74	2247.92	1819.9	2104.84	2138.47	1787.53	2407.05	2071.4	2054.85	2165.76	1804.95	2350.22
MW0121214	5-Bromo-3-(2,2,2-trifluoroethoxy)pyrazin-2-amine	C6H5BrF3N3O	542.9216	270.9568	0.6119	11.394	947249-22-1	--	--	--	59251962	Organoheterocyclic compounds	Diazines	6564.35	40515.55	14430.39	9095.61	11571.93	9489.14	11464.89	11078.39	45523.35	7167.41	7599.1	14937.77
MW0145223	Arachidonoyl Ethanolamide-d4	C22H33D4NO2	352.3209	351.3075	0.521	11.333	946524-40-9	--	--	96417	24762159	Organic nitrogen compounds	Organonitrogen compounds	12858.81	24771.98	15317.81	10609.82	28218.55	19877.46	25798.21	13770.49	25335.82	17299.09	11793.41	17593.35
MW0006588	Cinosulfuron	C15H19N5O7S	827.2095	413.1005	0.6066	0.6137	94593-91-6	--	C18818	--	92420	Benzenoids	Benzene and substituted derivatives	4718.4	5854.16	3734.43	5800.49	4359.34	4029.22	5093.44	6689.28	5068.4	5050.21	7475.98	3766.06
MW0002425	2-[([1,1'-Biphenyl]-4-ylcarbonyl)amino]benzoic acid	C20H15NO3	652.2444	317.1052	0.6447	1.9147	94578-69-5	--	--	--	914489	Benzenoids	Benzene and substituted derivatives	3301.63	2818.87	5415.78	1205.66	861.87	3539.85	445.96	214.34	277.44	272.53	86.32	52.88
MW0115746	(±)-Cromakalim	C16H18N2O3	331.1031	286.1317	0.6442	0.6105	94470-67-4	--	--	--	71191	Organoheterocyclic compounds	Benzopyrans	7270.59	8823.33	7530.38	7095.24	5418.88	7239.44	9261.72	9639.54	11523.42	10054.2	11411.3	9673.78
MW0152041	Knipholone	C24H18O8	452.1342	434.1002	0.6397	4.8503	94450-08-5	--	C10365	--	442753	Benzenoids	Anthracenes	2854.7	3332.62	3146.36	3313.64	4109.58	3427.78	3522.24	2938.41	3072.85	3399.72	3282.81	2777.08
MEDP1857	Eicosanoyl-EA	C22H45NO2	356.3524	355.345	0.7764	7.4693	94421-69-9	-	-	--	3787294	Organic acid And Its derivatives	Organicacid and Its derivatives	94644.63	98412.56	44614.47	82257.78	54381.55	57245.06	74044.9	112413.0	53144.16	82360.44	128265.79	102359.03
MEDP1163	Palmitoyl-EA	C18H35NO2	336.2167	297.2668	0.6147	4.7915	94421-67-7	-	-	--	4671	Alcohol and amines	Amines	20118.58	22129.06	20868.97	16863.09	19274.07	22201.74	19924.21	17180.32	20959.42	30559.59	29710.8	19851.67
MEDN0273	1,3-Dimethyluric Acid	C7H8N4O3	431.095	196.06	0.75	1.0188	944-73-0	HMDB0001857	-	--	70346	Amino acid and Its metabolomics	Amino acid derivatives	4443.65	1625.26	3188.62	725.46	897.34	3300.82	995.93	712.5	2057.65	2317.82	1753.86	1363.91
MW0007211	Fonofos	C10H15OPS2	531.0239	246.0302	0.6336	1.013	944-22-9	--	C18987	--	13676	Benzenoids	Benzene and substituted derivatives	1519.35	1868.22	1823.36	1009.43	1440.83	2766.3	3692.46	2643.65	2440.64	3932.77	3403.43	3338.08
MW0122318	7-(Chloromethyl)-2-methyl-5H-[1,3]thiazolo[3,2-a]pyrimidin-5-one	C8H7ClN2OS	280.95	213.9968	0.6428	0.6438	943656-55-1	--	--	--	17604716	Organoheterocyclic compounds	Diazines	31852.22	38450.46	36073.37	40804.42	43857.48	44385.49	20215.71	22766.02	22554.26	21781.12	21853.31	22995.45
MW0055329	N-Nervonoyl-D-erythro-sphingosylphosphorylcholine	C47H93N2O6P	813.6839	812.6771	0.8134	7.9034	94359-13-4	HMDB0012107	--	--	44260126	Lipids and lipid-like molecules	Sphingolipids	1840.03	1379.19	584.73	774.12	1459.06	268.76	132.11	15.33	27.56	446.58	5173.8	3831.44
MW0104690	2-Bromo-N-(tert-butyl)propanamide	C7H14BrNO	432.0855	207.0259	0.6396	11.8021	94318-80-6	--	--	--	154557	Organic acids and derivatives	Carboxylic acids and derivatives	143185.1	135564.12	86670.84	128483.76	19354.13	116230.82	156478.84	77628.42	104946.87	73565.12	102671.21	60661.53
MW0107880	L-Homophenylalanine	C10H13NO2	381.1758	179.0946	0.5839	4.3562	943-73-7	--	C17235	43203	2724505	--	--	3833.1	3459.65	5718.76	1597.02	1463.2	4081.67	1331.97	1765.74	1755.14	1416.1	1870.01	1663.25
MW0105406	Acetamide, N-[2-[(1S,4R) -6-[[4-(cyclobutylamino)-5-(trifluoromethyl)-2-pyrimidinyl] amino]-1,2,3,4-tetrahydronaphthalen-1,4-imin-9-yl]-2- oxoethyl]-	C23H25F3N6O2	439.1848	474.1991	0.6217	1.022	942487-16-3	--	--	--	51346455	Organic acids and derivatives	Carboxylic acids and derivatives	4243.63	3157.69	4462.26	1325.05	2345.78	2779.16	1436.05	1116.36	1806.77	1959.56	1356.84	1192.5
MW0123744	DL-α-Lipoamide	C8H15NOS2	269.0765	205.0595	0.5042	5.6639	940-69-2	HMDB0000962	C00248	3372	863	Organoheterocyclic compounds	Dithiolanes	969.63	975.65	1118.55	671.05	1096.69	765.23	1254.16	1166.09	189.35	1560.85	1964.18	1221.25
MEDL02249	Chalcone	C15H12O	434.2117	208.0888	0.6387	5.2185	94-41-7	HMDB0003066	C01484	--	637760	Flavonoids	Chalcones	58197.72	76407.85	75755.41	76108.83	80190.44	72742.86	57605.88	57961.8	58319.69	61050.07	59230.66	60393.13
MEDN0746	Butylparaben	C11H14O3	195.1013	194.0943	0.5820000000000001	11.5369	94-26-8	HMDB0032575	-	--	7184	Benzene and substituted derivatives	Phenolic acids	48973.67	19121.07	25835.59	43045.37	55016.38	43631.6	49854.99	52382.85	49604.24	80552.67	60248.16	40491.98
MW0156344	Rebeccamycin	C27H21Cl2N3O7	645.9934	569.0757	0.5842	0.6516	93908-02-2	--	C19701	--	73110	Organoheterocyclic compounds	Indoles and derivatives	1614.2	2492.5	4304.79	4532.86	3254.66	4387.56	807.47	1006.88	1624.8	2109.65	364.57	1171.05
MW0123049	Benzenemethanol, 5-[2-[(2R,6S)-2,6-dimethyl-4-morpholinyl]-4-(4-morpholinyl)pyrido[2,3-d]pyrimidin-7-yl]-2-methoxy-, rel-	C25H31N5O4	510.2092	465.2376	0.6317	1.8999	938440-64-3	--	--	--	16736978	Organoheterocyclic compounds	Pyridines and derivatives	1305.04	3037.7	1459.59	2696.04	2842.01	2327.9	558.06	1153.1	408.66	420.54	550.39	816.07
MW0103348	2'-Deoxyinosine 5'-monophosphate	C10H13N4O7P	687.0938	332.0522	0.6458	1.7841	93841-33-9	HMDB0006555	C06196	--	135398614	Nucleosides, nucleotides, and analogues	Purine nucleotides	4809.61	8154.38	4733.02	3179.22	2865.95	463.3	9609.06	9738.19	6269.36	5902.74	9295.5	11485.92
MW0007301	Heptanediamide, N1-(2-aminophenyl)-N7-(4-methylphenyl)-	C20H25N3O2	304.1834	339.1947	0.5041	4.449	937039-45-7	--	--	45494	16070100	Benzenoids	Benzene and substituted derivatives	13515.69	11622.27	19560.53	2924.7	7854.66	13109.67	5807.01	5245.74	6615.29	6629.91	7071.9	5645.7
MW0120700	4-Quinazolinamine, 2-(hexahydro-4-methyl-1H-1,4-diazepin-1-yl)-6,7-dimethoxy-N-[1-(phenylmethyl)-4-piperidinyl]-	C28H38N6O2	529.2662	490.3056	0.7818	6.3176	935693-62-2	--	--	45462	25150857	Organoheterocyclic compounds	Piperidines	12800.24	12302.05	11989.36	12625.76	13455.71	12005.85	10747.78	13564.87	12297.11	10735.42	16671.09	12241.35
MW0122519	7-Methyladenine	C6H7N5	213.08599999999998	149.0701	0.6495	0.9145	935-69-3	HMDB0011614	C02241	62383	71593	Organoheterocyclic compounds	Imidazopyrimidines	3695.03	3324.1	4356.53	2956.78	3079.74	2564.07	2941.26	2454.53	2308.05	2413.29	3194.65	3875.57
MW0002755	2-Bromo-3,6-difluorobenzaldehyde	C7H3BrF2O	220.9413	219.9335	0.6154	0.6742	934987-26-5	--	--	--	50998399	Benzenoids	Benzene and substituted derivatives	13878.64	16511.8	15127.19	11403.99	12171.69	15740.07	7924.73	7734.64	6918.03	8784.42	4176.84	8569.2
MW0155601	Plakinamine B	C31H50N2	489.3602	450.3974	0.6212	9.1026	93474-14-7	--	C16895	--	21606896	Lipids and lipid-like molecules	Prenol lipids	847.89	3293.1	5438.71	1049.99	3878.08	3484.54	789.99	1078.58	570.33	603.87	788.95	803.04
MW0062212	Prostaglandin A1 ethyl ester	C22H36O4	347.2582	364.2614	0.5912	8.9399	93464-24-5	--	--	45366	12149511	Lipids and lipid-like molecules	Fatty Acyls	51938.75	44616.05	61404.54	24628.57	35266.66	41559.14	23705.3	33670.9	29858.42	27407.16	28597.86	22745.7
MW0006274	Benzoic acid, 4-hydroxy-3-[[2-(4-tricyclo[3.3.1.1(3,7)]dec-1-ylphenoxy)acetyl]amino]-, methyl ester	C26H29NO5	499.2204	435.2046	0.8986	5.593	934593-90-5	--	--	45359	16124726	Benzenoids	Benzene and substituted derivatives	8083.63	5149.43	3555.83	10322.23	9639.99	4831.32	5883.41	7029.18	5965.57	10022.08	7167.33	7074.32
MW0116001	(7R)-2-Amino-7-[4-fluoro-2-(6-methoxy-2-pyridyl)phenyl]-4-methyl-7,8-dihydro-6H-pyrido[4,3-d]pyrimidin-5-one	C20H18FN5O2	781.2788	379.1445	0.6267	0.6438	934343-74-5	--	--	--	46216556	Organoheterocyclic compounds	Pyridines and derivatives	971.41	833.46	1607.41	2537.2	462.15	2156.89	2316.14	4045.25	4038.48	5817.88	4603.45	3618.37
MW0104901	3,3,3-Trifluoropropanehydrazide	C3H5F3N2O	323.0343	142.0354	0.622	4.3301	934171-99-0	--	--	--	16786607	Organic acids and derivatives	Carboxylic acids and derivatives	9980.8	6700.19	7164.66	5933.59	3041.76	6767.7	2504.45	2393.2	941.64	1107.38	1638.65	1478.49
MW0146342	Asperlicin C	C25H18N4O2	407.1505	406.14300000000003	0.6368	3.2435	93413-06-0	--	C21147	--	146429	Organoheterocyclic compounds	Pyrimidodiazepines	6456.14	7228.01	7694.05	7028.75	7460.99	5885.82	6519.79	7773.67	7437.36	8366.35	7108.45	7994.4
MW0118282	2-Aminobenzimidazole	C7H7N3	151.0963	133.064	0.5428	10.8211	934-32-7	--	C10901	--	13624	Organoheterocyclic compounds	Benzimidazoles	41320.47	62853.79	13764.08	44926.2	45773.97	56596.94	50813.36	55049.59	54201.36	49230.84	63965.44	67844.97
MW0117119	1H-Pyrrole-2-carboxamide, N-[1-(3-chloro-4-fluorophenyl)-2-hydroxyethyl]-4-[4-(3-chlorophenyl)-1H-pyrazol-3-yl]-	C22H17Cl2FN4O2	503.0424	458.0713	0.6394	0.5636	933786-58-4	--	--	--	135523966	Organoheterocyclic compounds	Azoles	4564.82	2772.49	5077.54	4789.47	1947.32	3605.03	1261.83	2446.29	2213.45	1344.94	1702.87	470.31
MW0117207	1-Methyl-4-(1-piperazinylsulfonyl)piperazine	C9H20N4O2S	271.12	248.1307	0.6476	4.3133	933038-72-3	--	--	--	25312923	Organoheterocyclic compounds	Diazinanes	7638.65	4219.21	3497.27	3201.63	2410.89	5479.18	1592.96	1934.56	991.04	1983.05	2160.41	1265.77
MW0116338	1-(2-Hydroxyethyl)-2-imidazolidinethione	C5H10N2OS	310.1367	146.0514	0.6453	3.9896	932-49-0	--	--	--	2801741	Organoheterocyclic compounds	Azolidines	10888.05	10154.98	4321.48	8181.18	10467.07	11298.8	13991.78	12552.1	14478.52	14402.22	14743.87	11883.17
MW0001303	1,3,4-Oxadiazol-2(3H)-one, 3-[1-[[1-(4-methylphenyl)cyclopropyl]carbonyl]-4-piperidinyl]-5-phenyl-	C24H25N3O3	824.4129	403.1896	0.643	8.1896	931695-79-3	--	--	--	23612552	Benzenoids	Benzene and substituted derivatives	2523.18	2862.14	3090.74	1606.69	2473.29	3051.68	1393.8	1473.13	2038.16	2431.03	2111.48	2378.35
MW0130531	2-[2-(3,4-Dimethoxyphenyl)ethyl]-4-methoxy-2,3-dihydropyran-6-one	C16H20O5	275.1229	292.1311	0.7171	5.4123	93159-88-7	HMDB0030767	--	44639	592220	Phenylpropanoids and polyketides	Kavalactones	16840.49	30800.74	32452.7	17820.73	17483.19	23426.86	22912.34	22101.79	22093.81	40677.17	23046.37	23178.62
MW0123822	Enrofloxacin	C19H22FN3O3	736.3627	359.1645	0.6412	7.3778	93106-60-6	HMDB0029861	D02473	--	71188	--	--	6660.22	13849.24	14219.35	9003.59	12737.52	14277.16	4289.1	3478.68	3087.07	8775.44	5147.91	4087.73
MW0008501	N-(6-Amino-1-butyl-2,4-dioxo-1,2,3,4-tetrahydro-5-pyrimidinyl)-N-methylbenzenesulfonamide	C15H20N4O4S	317.1062	352.1205	0.6132	5.6198	930952-94-6	--	--	--	17564369	Benzenoids	Benzene and substituted derivatives	1783.58	2188.14	2088.23	1591.9	1064.13	2656.59	444.7	2281.29	357.38	1750.96	2338.35	740.99
ZINC1706	Nikomet	C7H7NO2	292.3111	137.138	0.5573	7.3523	93-60-7	HMDB0029806	-	--	7151	Organoheterocyclic compounds	Pyridines and derivatives	1643.0	2723.54	3583.87	1176.95	2929.49	3311.29	1083.86	1246.9	724.49	1256.79	2001.96	1203.09
MEDL02426	Methyl Benzoate	C8H8O2	137.0598	136.0524	0.7881	3.8283	93-58-3	HMDB0033968	C20645	--	7150	Phenolic acids	Phenolic acids	15106.94	15166.53	14710.99	15644.2	15399.12	14657.03	7451.87	8581.52	1292.03	7319.56	7782.04	7876.14
MEDL02752	Umbelliferone	C9H6O3	225.1098	162.0317	0.7639	3.5924	93-35-6	HMDB0029865	C09315	--	5281426	Lignans and Coumarins	Coumarins	157730.42	179804.64	171038.83	164313.72	177420.31	176636.99	180198.73	185113.81	184470.49	209461.4	204857.59	195254.97
MW0139397	Pracinostat	C20H30N4O2	376.2706	358.2369	0.7423	5.9772	929016-96-6	--	--	96423	49855250	Phenylpropanoids and polyketides	Cinnamic acids and derivatives	2515.28	2450.99	2381.16	1648.43	2719.58	2169.38	1400.81	1375.01	1445.56	2661.37	2044.47	1727.31
MW0112024	2-[2-[2-(2-aminoethoxy)ethoxy]ethoxy]ethylamine	C8H20N2O3	157.1334	192.1474	0.8919	1.7697	929-75-9	--	--	--	70250	Organic oxygen compounds	Organooxygen compounds	50136.45	42291.27	75882.73	42461.6	41093.3	66244.12	21737.8	19348.16	21360.5	46712.75	21077.44	21264.11
MW0011520	(E)-3-Hexen-1-ol	C6H12O	142.1226	100.0888	0.6497	0.3204	928-96-1	--	--	--	5284503	Lipids and lipid-like molecules	Fatty Acyls	7949.23	7908.8	7929.93	5897.4	5229.54	5401.95	7966.18	2813.53	6708.63	5581.88	6296.01	5621.19
MW0014460	4-Hexen-1-ol, (E)-	C6H12O	219.2147	100.0888	0.9670000000000001	4.7312	928-92-7	--	--	--	641248	Lipids and lipid-like molecules	Fatty Acyls	3026.52	3034.89	2604.8	2517.0	2542.65	2862.15	3616.02	2972.08	2348.26	2847.52	3629.83	3571.38
MW0140277	(2-Fluorophenyl) N-[2-[[(1R,2S)-2-(butoxymethyl)cyclohexyl]methoxy]ethyl]carbamate	C21H32FNO4	399.2545	381.2315	0.5218	4.9829	926657-43-4	--	--	45188	52204060	Benzenoids	Benzene and substituted derivatives	4264.34	3522.52	967.7	1311.92	4256.53	3823.55	3369.33	3422.43	4856.8	3465.97	4058.52	4164.18
MW0123271	Cefprozil	C18H19N3O5S	779.2166	389.1045	0.6408	2.8807	92665-29-7	HMDB0015281	C06888	--	5281006	Organoheterocyclic compounds	Lactams	1003.65	972.56	1687.24	1222.62	1413.88	1008.58	833.21	540.77	397.39	196.96	1265.61	681.04
MW0116502	1-(Cyclopentylcarbonyl)-4-piperidinamine	C11H20N2O	431.2787	196.1576	0.6214	7.9776	926234-06-2	--	--	--	16772636	Organoheterocyclic compounds	Piperidines	2066.35	1991.48	2275.78	1582.68	405.86	1729.04	1216.27	578.7	290.38	1484.53	479.01	379.41
MW0115786	(1-Benzyl-5-nitro-1H-benzimidazol-2-yl)methanol	C15H13N3O3	850.2814	283.0957	0.9047	1.4893	92555-02-7	--	--	--	791816	Organoheterocyclic compounds	Benzimidazoles	25604.84	19542.65	21725.24	13310.41	11053.65	18895.05	2103.29	1076.76	2028.82	1468.36	1538.18	1579.93
MW0116764	1-[(4R)-4-(6-Bromo-1,3-benzodioxol-5-yl)-3a,4,5,9b-tetrahydro-3H-cyclopenta[c]quinolin-8-yl]ethanone	C21H18BrNO3	456.0193	411.04699999999997	0.5814	0.922	925420-28-6	--	--	64662	45028686	--	--	19100.24	12513.62	25027.35	11043.56	9692.98	14091.82	15094.97	15051.58	16374.98	18338.98	25434.05	14526.35
MW0000802	(R)-N-[1-[4-(2,4-Dimethoxybenzyl)-5-phenethyl-4H-1,2,4-triazol-3-yl]-2-(1H-indol-3-yl)ethyl]picolinamide	C35H34N6O3	609.2909	586.2692	0.5325	5.5156	925239-03-8	--	--	45361	53394052	Benzenoids	Benzene and substituted derivatives	385.14	840.35	473.46	2518.35	2032.08	365.81	990.97	532.66	1718.49	3668.74	4135.34	3170.13
MW0111720	1,5-Hexadien-3-ol	C6H10O	81.0699	98.0732	0.6488	12.7997	924-41-4	--	--	--	79122	Organic oxygen compounds	Organooxygen compounds	15574.62	14752.6	20257.33	25732.75	15416.97	13453.23	42566.03	48422.65	28527.15	15586.49	17661.86	18556.0
MW0125649	Navitoclax	C47H55ClF3N5O6S3	956.2958	973.2955	0.5401	11.4388	923564-51-6	--	D09935	--	24978538	Organoheterocyclic compounds	Diazinanes	2837.28	3919.82	3971.74	2795.84	3763.13	2951.5	3152.99	2157.34	5912.15	2697.36	12895.93	7575.06
MW0110719	2-Chloro-5-fluoro-4-(1-pyrrolidinyl)pyrimidine	C8H9ClFN3	246.0186	201.0469	0.6202	2.4341	923119-59-9	--	--	--	16762742	Organic nitrogen compounds	Organonitrogen compounds	1234.45	1908.27	1656.88	1742.54	2607.66	1854.1	1592.94	1047.38	12.55	1620.27	1549.82	1748.8
MW0148330	Devapamil	C26H36N2O3	425.2868	424.2726	0.5812	7.441	92302-55-1	--	C13763	--	65832	Benzenoids	Benzene and substituted derivatives	97198.87	96975.87	44511.0	38910.66	37308.2	51997.77	48976.37	54313.46	55209.05	54752.24	68256.58	47713.42
MW0108718	N-Carbamoyl-L-aspartate	C5H8N2O5	149.0439	176.0433	0.7094	13.6257	923-37-5	HMDB0000828	C00438	--	93072	Organic acids and derivatives	Carboxylic acids and derivatives	15893.61	4553.83	8236.1	3729.38	5061.4	8577.43	6728.53	7981.06	17366.18	5284.99	5747.55	6946.66
MW0125299	N-(1-Methyl-2-oxo-1,2,3,4-tetrahydroquinolin-6-yl)-1-(p-tolyl)methanesulfonamide	C18H20N2O3S	362.1538	344.1195	0.6131	4.8358	922058-97-7	--	--	--	40889570	Organoheterocyclic compounds	Quinolines and derivatives	1114.21	1849.39	1772.68	1301.97	2243.56	1504.65	1330.52	1304.03	262.91	816.94	1912.18	1196.8
MW0116483	1-(7H-Purin-6-yl)-N-(3-(trifluoromethyl)phenyl)piperidine-4-carboxamide	C18H17F3N6O	803.2727	390.1416	0.6411	7.9108	920434-12-4	--	--	--	16414316	Organoheterocyclic compounds	Imidazopyrimidines	2245.13	2090.84	1228.89	2597.16	2092.49	1477.51	1665.83	2241.64	561.75	2966.04	2181.92	1485.8
MW0143417	4-Nitrobiphenyl;4-Nitro-1,1'-biphenyl	C12H9NO2	437.0898	199.0633	0.649	0.6779	92-93-3	--	C19473	--	7114	Benzenoids	Benzene and substituted derivatives	11037.0	6008.43	2776.95	13895.92	11621.97	4276.05	15805.72	7116.17	10660.78	13923.49	11846.31	11983.19
MW0126110	Phenylpiperazine	C10H14N2	342.264	162.1157	0.6827	6.0803	92-54-6	--	--	96615	7096	Organoheterocyclic compounds	Diazinanes	1737.6	2239.24	1869.37	2089.15	2762.32	2102.57	4223.66	2203.01	2430.22	2320.38	2728.28	4019.76
MW0009164	Norsertraline	C16H15Cl2N	336.0292	291.0582	0.6321	2.9187	918933-19-4	--	--	85020	577181	Benzenoids	Tetralins	12593.29	10205.17	10874.1	7096.29	5430.87	10357.53	2532.93	2926.67	2439.36	2950.34	3325.88	2516.63
MW0000779	(E)-3-(4-Chloroanilino)-N-(4-chlorophenyl)-2-(3-methylisoxazol-5-yl)acrylamide	C19H15Cl2N3O2	429.0885	387.0541	0.6064	12.4128	917837-54-8	--	--	--	16005981	Benzenoids	Benzene and substituted derivatives	136098.78	103416.45	103569.09	99139.35	80445.45	196962.25	97375.25	87797.34	103633.18	134376.66	76964.96	397320.62
MW0155632	p-Menthane-3,8-diol;(-)-3,8-p-Menthanediol	C10H20O2	196.1413	172.1463	0.9193	6.3034	91739-72-9	--	C02904	--	19100	Lipids and lipid-like molecules	Prenol lipids	11011.65	10882.43	11305.22	11065.91	11113.37	10627.49	11516.44	13080.65	11319.94	10671.76	16154.98	13171.01
MW0109756	Spiro[3H-indole-3,3'-pyrrolidine]-1(2H)-acetic acid, 5-chloro-1'-[(2-fluorophenyl)methyl]-2,2',5'-trioxo-	C20H14ClFN2O5	417.0709	416.0575	0.542	5.4413	916046-55-4	--	--	45351	15950102	Organic acids and derivatives	Carboxylic acids and derivatives	2663.7	1640.77	2197.9	3657.14	2979.11	3421.11	3920.38	2767.79	3949.17	3135.54	3075.42	3860.62
MW0117736	2-(Trifluoromethyl)-1,3-thiazole-4-carboxylic acid	C5H2F3NO2S	411.9858	196.9758	0.6294	2.9245	915030-08-9	--	--	--	28875557	Organoheterocyclic compounds	Azoles	396.14	271.29	137.87	516.18	626.48	398.74	1082.06	814.82	393.05	1373.35	1032.26	1011.93
MW0015342	8-iso-15-Ketoprostaglandin E2	C20H30O5	351.2163	350.2093	0.7484	6.3618	914804-63-0	HMDB0002341	--	--	53477750	Lipids and lipid-like molecules	Fatty Acyls	141926.19	68216.04	207809.87	85785.58	94786.14	68270.03	56202.33	57600.15	53465.6	74063.86	81501.82	61773.25
MW0007623	Methanone, [5-(2-chlorophenyl)-1-pentyl-1H-pyrrol-3-yl]-1-naphthalenyl-	C26H24ClNO	803.3175	401.1546	0.6133	0.8096	914458-27-8	--	--	--	16049784	Benzenoids	Naphthalenes	1619.4	1641.92	1577.03	777.89	2290.06	1861.72	611.23	434.55	428.0	430.14	138.71	564.4
MW0007624	Methanone, [5-(2-fluorophenyl)-1-pentyl-1H-pyrrol-3-yl]-1-naphthalenyl-	C26H24FNO	452.1377	385.1842	0.635	1.9231	914458-26-7	--	--	--	16049783	Benzenoids	Naphthalenes	4558.26	3643.93	5403.29	3219.86	2291.72	5548.14	1303.78	1526.77	1922.46	852.32	1651.67	1645.32
MW0126674	tert-Butyl 3-((5-bromopyrimidin-2-yl)oxy)pyrrolidine-1-carboxylate	C13H18BrN3O3	382.0109	343.0532	0.5125	3.2504	914347-79-8	--	--	--	23115998	Organoheterocyclic compounds	Pyrrolidines	1947.65	1066.83	3867.83	2101.26	2543.67	2376.19	2564.96	2566.84	1126.15	2641.84	2414.7	2958.85
MW0003918	3-Chloro-4-fluoro-5-trifluoromethylaniline	C7H4ClF4N	289.916	212.9968	0.6458	0.3731	914225-61-9	--	--	--	29934847	Benzenoids	Benzene and substituted derivatives	2343.27	570.34	1046.32	1035.0	828.23	964.95	603.53	653.37	968.14	579.57	508.31	972.38
MW0000116	Acetamide, N-[2-[5-(acetyloxy)-3,6-dimethoxy-1-phenanthrenyl]ethyl]-N-methyl-	C23H25NO5	459.1887	395.1733	0.6235	6.4795	91295-74-8	--	--	--	23258168	Alkaloids and derivatives	6,6a-secoaporphines	1776.48	2656.73	1486.67	2678.64	3119.55	2411.43	2067.36	2011.1	2212.92	868.22	1648.07	2011.39
MW0151989	Kalihinol A	C22H33ClN2O2	439.2363	392.2231	0.6211	5.4112	91294-83-6	--	C17004	--	185105	Lipids and lipid-like molecules	Prenol lipids	942.65	1011.33	1757.21	5383.55	1436.4	187.97	1486.19	2464.86	3290.98	3745.32	4105.78	3438.92
MW0116980	1H-Benzimidazole-7-carboxamide, 2-[(2R)-2-methyl-2-pyrrolidinyl]-	C13H16N4O	245.1358	244.1324	0.7273	2.9787	912444-00-9	--	D09692	--	11960529	Organoheterocyclic compounds	Benzimidazoles	7905.36	15451.5	13739.36	11205.38	21379.64	15223.67	15624.9	18012.52	21186.1	19474.55	22703.0	16372.21
MW0003884	3-Bromo-N-(2-hydroxyethyl)benzenesulfonamide	C8H10BrNO3S	596.8748	278.9565	0.5822	0.6887	911111-96-1	--	--	--	25307187	Benzenoids	Benzene and substituted derivatives	16655.4	19228.61	16475.76	10457.84	12152.7	17703.58	4566.72	6031.31	2314.43	5289.28	379.9	6262.46
MEDN0824	7-ketodeoxycholic acid	C24H38O5	408.2801	406.2719	0.862	9.1751	911-40-0	HMDB0000391	-	--	188292	Hormones and hormone related compunds	Hormones and hormone related compunds	301221.69	350087.4	480360.89	227006.41	299953.65	344175.38	226345.26	230596.14	220598.32	280345.01	281936.05	240583.46
MW0054667	Malonyl-L-carnitine	C10H17NO6	294.1185	247.1056	0.5574	1.1535	910825-21-7	HMDB0062592	--	--	91825606	--	--	17404.06	32918.74	23166.31	41427.94	50403.41	29578.52	92023.06	76496.76	70969.85	28510.33	92601.28	90628.42
MW0056741	Palmitoleoyl 3-carbacyclic phosphatidic acid	C20H37O5P	799.4802	388.2379	0.7403	6.9393	910228-13-6	--	--	44868	9909601	Lipids and lipid-like molecules	Fatty Acyls	6225.1	10718.26	19373.59	3837.98	9059.59	10609.58	3278.05	4003.88	3496.91	4339.28	6809.69	3674.35
MW0009910	Thiocarlide	C23H32N2O2S	401.2282	400.2184	0.7288	9.1032	910-86-1	--	D07246	64625	3001386	Benzenoids	Benzene and substituted derivatives	25024.36	20434.1	23747.69	23450.82	25777.19	22442.27	28005.82	27233.03	26437.29	28090.85	36336.94	32059.19
MW0009615	Pyrilamine	C17H23N3O	324.1475	285.1841	0.5801	2.5385	91-84-9	HMDB0015639	C11798	--	4992	Benzenoids	Benzene and substituted derivatives	80068.88	67286.13	60823.42	41101.23	36519.34	54050.18	32510.57	42539.85	43250.86	94520.72	36715.93	36896.6
MW0009987	Tripelennamine	C16H21N3	278.1606	255.1735	0.5728	6.0797	91-81-6	HMDB0014930	C07180	--	5587	Benzenoids	Benzene and substituted derivatives	3786.7	3370.34	3526.66	3503.31	3093.2	3202.49	4084.41	2900.23	1301.53	3836.61	2535.25	3541.39
MW0123897	Ethoxyquin	C14H19NO	264.1594	217.1467	0.562	5.4557	91-53-2	HMDB0039531	--	44287	3293	Organoheterocyclic compounds	Quinolines and derivatives	884.08	1913.72	1485.93	2537.95	2832.08	2079.67	4760.84	4388.64	2679.53	2188.85	3880.85	5360.94
MW0007274	Guaiacol methyl ether	C8H10O2	139.0753	138.0681	0.5901	3.8867	91-16-7	HMDB0032139	--	--	7043	Benzenoids	Benzene and substituted derivatives	3608.32	3712.63	3669.67	4123.38	4729.55	3009.56	2750.86	3879.52	3429.9	3225.35	4010.08	3596.42
MW0006231	Benzhydrol	C13H12O	391.168	184.0888	0.9516	3.0545	91-01-0	--	--	--	7037	Benzenoids	Benzene and substituted derivatives	25019.79	24266.61	22520.26	24780.49	24143.05	25463.56	24715.2	23969.03	24505.5	27313.4	22795.36	19826.63
MW0063341	Rhizoxin	C35H47NO9	648.3158	625.3251	0.5828	2.2113	90996-54-6	--	--	85113	6437358	Lipids and lipid-like molecules	Prenol lipids	87.42	1806.84	1553.71	3177.16	5582.39	1713.46	66.55	77.13	13.81	13.44	66.4	16.99
MW0109259	Phosphonic acid, P-[(3R)-3-amino-4-[(3-hexylphenyl)amino]-4-oxobutyl]-	C16H27N2O4P	343.1731	342.1708	0.7435	3.773	909725-61-7	--	--	45167	6857802	Organic acids and derivatives	Carboxylic acids and derivatives	98813.49	131732.0	139358.43	86572.88	145632.04	153911.85	167879.47	178606.12	178227.02	228741.77	177484.37	178987.36
MW0118395	2-Chloro-3-iodopyridin-4-amine	C5H4ClIN2	546.7854	253.9108	0.614	7.6913	909036-46-0	--	--	--	24229208	Organoheterocyclic compounds	Pyridines and derivatives	2020.56	2623.83	986.36	2414.56	2186.22	959.07	4407.35	3016.1	4723.82	3080.6	5598.36	3234.52
MW0053772	Goshonoside F5	C32H54O13	611.3426	646.3564	0.6485	7.2798	90851-28-8	--	--	--	13855771	Lipids and lipid-like molecules	Prenol lipids	765.65	480.31	222.47	387.64	1025.42	697.9	1644.95	2455.16	1953.92	3559.34	2983.12	2222.96
MEDL01985	Goshonoside F4	C32H54O12	648.3951	630.3615	0.628	4.8136	90851-27-7	HMDB0038377	-	--	131752350	Terpenoids	Ditepenoids	1374.04	1439.08	1537.34	1618.64	1468.24	1454.98	1753.71	1794.77	1694.47	1930.23	1452.92	2116.72
MW0000595	(2-Bromo-4-ethylphenoxy)acetic acid	C10H11BrO3	322.0052	257.9892	0.63	0.6743	90841-60-4	--	--	--	693155	Benzenoids	Benzene and substituted derivatives	12061.92	11448.76	11999.74	13382.18	11029.0	9192.26	15143.74	15551.56	13883.72	15032.45	9719.89	15033.4
MW0140001	(+/-)-10-Hydroxy-4Z,7Z,11E,13Z,16Z,19Z-Docosahexaenoic Acid	C22H32O3	711.4587	344.2351	0.6127	2.6575	90780-50-0	HMDB0060037	--	--	11537494	Lipids and lipid-like molecules	Fatty Acyls	2562.05	3309.29	7063.71	3311.88	4352.16	3564.87	2996.6	3419.63	2999.84	6415.31	4023.32	3475.88
MW0155029	Pfaffoside A	C40H60O13	771.3927	748.4034	0.6485	4.7613	90745-17-8	--	C08966	--	441937	Lipids and lipid-like molecules	Prenol lipids	2138.42	3471.98	2491.7	2589.49	1818.94	2787.16	2304.85	1257.57	2244.4	1510.96	2530.64	2075.9
MW0006953	Ebastine	C32H39NO2	452.2955	469.2981	0.597	10.6051	90729-43-4	HMDB0060159	D01478	--	3191	Benzenoids	Benzene and substituted derivatives	20115.76	19523.76	16243.17	24196.37	22244.87	20456.92	24811.14	24395.35	23865.88	23801.56	23834.75	25263.7
MW0006506	Carebastine	C32H37NO4	482.2691	499.2723	0.6398	6.3761	90729-42-3	--	--	--	65820	Benzenoids	Benzene and substituted derivatives	1566.28	1086.27	1546.26	940.14	905.68	966.36	1574.46	1518.37	1493.11	1446.66	1644.11	1363.69
MW0004373	4-(Difluoromethoxy)-3-nitrobenzoic acid	C8H5F2NO5	297.0295	233.0136	0.6388	2.9191	906747-90-8	--	--	--	43137735	Benzenoids	Benzene and substituted derivatives	195.85	456.63	117.17	591.97	328.4	294.05	1322.57	730.12	1103.51	922.57	1142.15	1114.98
MW0146496	Azidopine	C27H26F3N5O5	621.2043	557.1886	0.6443	0.6438	90523-31-2	--	C11282	--	656406	Benzenoids	Benzene and substituted derivatives	9272.91	10655.03	10021.25	10874.01	7278.61	8433.44	5025.96	13428.73	16706.26	10877.83	13556.03	12630.03
MW0103804	(-)-Indolactam V	C17H23N3O2	346.1503	301.17900000000003	0.6449	1.9	90365-57-4	--	--	--	105000	Organic acids and derivatives	Carboxylic acids and derivatives	2212.35	3946.08	2986.09	3673.61	2988.44	2866.84	2804.13	3592.24	4311.26	3699.44	3812.62	2598.09
MW0008732	N-[4-Cyano-3-(trifluoromethyl)phenyl]-3-[(4-fluorophenyl)thio]-2-hydroxy-2-methylpropionamide	C18H14F4N2O2S	421.0663	398.0712	0.6028	2.1238	90356-78-8	--	--	--	9800987	Benzenoids	Benzene and substituted derivatives	4249.52	4331.38	4453.24	4384.87	4331.46	4116.72	4418.95	4241.69	4187.95	4446.19	4644.58	4106.86
MW0120082	4,6-Dichloroindoline	C8H7Cl2N	231.9665	186.9956	0.625	1.3479	903551-23-5	--	--	--	16244448	Organoheterocyclic compounds	Indoles and derivatives	968.25	3426.49	2606.34	2050.4	3363.84	1980.26	2611.59	2416.7	1917.82	2359.08	1761.46	2151.9
MW0015236	7-Xylosyltaxol	C52H59NO18	950.3615	985.3732	0.5795	0.6423	90332-66-4	--	--	--	11094265	Lipids and lipid-like molecules	Prenol lipids	2305.04	653.06	1391.69	3630.15	3523.17	2396.66	2744.33	6374.51	7240.48	7175.49	7554.34	7072.85
MW0126669	tert-Butyl 2,4-dichloro-5H-pyrrolo[3,4-d]pyrimidine-6(7H)-carboxylate	C11H13Cl2N3O2	328.0043	289.0385	0.7187	2.5731	903129-71-5	--	--	--	17998715	Organoheterocyclic compounds	Pyrrolopyrimidines	1294.52	638.7	1944.53	505.95	806.95	2024.95	519.09	2260.79	1722.24	2112.74	2867.15	2163.23
MW0110765	3-(3-Methyl-1,2,4-oxadiazol-5-yl)piperidine	C8H13N3O	132.0913	167.1059	0.5984	0.6295	902837-17-6	--	--	--	6486603	Organic nitrogen compounds	Organonitrogen compounds	761.52	737.74	1742.2	1599.31	950.62	601.99	2076.67	2604.77	2183.9	2259.03	3241.62	2519.23
MW0103345	2'-Deoxyguanosine 5'-monophosphate	C10H14N5O7P	348.0709	347.0631	0.848	1.6655	902-04-5	HMDB0001044	C00362	--	135398597	Nucleosides, nucleotides, and analogues	Purine nucleotides	321046.94	480708.83	277869.06	739141.87	342799.69	95190.43	397842.85	1284788.49	920664.02	483218.92	1238165.58	907530.84
MW0110740	2-Cyano-N-(1,3-thiazol-2-yl)acetamide	C6H5N3OS	209.049	167.0153	0.6365	0.6629999999999999	90158-62-6	--	--	--	693166	Organic nitrogen compounds	Organonitrogen compounds	4194.77	6274.51	5353.57	2956.26	3565.82	4972.9	4754.55	4792.62	5320.85	3844.39	3142.49	5193.25
MW0116323	1-(2-Fluorobenzyl)-4-piperidinecarboxylic acid	C13H16FNO2	497.2222	237.1165	0.6397	5.9611	901313-43-7	--	--	--	3942648	Organoheterocyclic compounds	Piperidines	743.18	573.29	1090.87	1905.99	332.72	803.04	1241.14	2052.58	1166.86	1732.88	1106.45	1298.03
ZINC13481432	4-Hydroxy-2-methoxybenzoic acid	C8H8O4	232.1625	168.148	0.5526	4.7922	90111-34-5	-	-	--	12695575	Benzenoids	Benzene and substituted derivatives	8389.03	8171.9	8105.09	8863.9	9658.01	7852.8	11671.49	9646.89	9718.32	10646.72	12003.38	12104.83
MW0149223	Flocoumafen	C33H25F3O4	560.2063	542.1705	0.5474	4.3148	90035-08-8	--	C18696	--	54698175	Benzenoids	Naphthalenes	14699.96	6739.47	7426.2	6853.24	1373.5	8107.71	721.54	961.82	227.23	737.58	1327.97	908.33
MW0007815	Michler's ketone	C17H20N2O	537.3265	268.1576	0.5764	5.3816	90-94-8	--	C19266	--	7031	Benzenoids	Benzene and substituted derivatives	9212.46	11408.06	10829.61	9986.55	14767.82	11456.99	18413.61	16041.84	16707.49	21398.52	22509.13	21652.32
MW0114256	Diethylpropion	C13H19NO	252.1596	205.1467	0.6392	5.5153	90-84-6	HMDB0015072	C06954	--	7029	Organic oxygen compounds	Organooxygen compounds	1364.42	4012.37	3783.63	6288.9	8118.65	3821.58	1689.15	1371.31	375.03	2924.88	1310.94	2132.37
MW0006979	Ephedrine	C10H15NO	207.1489	165.1154	0.6296	3.1267	90-83-5	HMDB0015451	C01575	44682	9294	Benzenoids	Benzene and substituted derivatives	14978.2	19946.91	21492.09	17939.32	20686.82	20307.43	26849.34	25453.1	27507.12	27567.4	28453.28	28546.96
MEDL02637	Pseudoephedrine	C10H15NO	166.1226	165.1154	0.7092	3.8280000000000003	90-82-4	HMDB0001943	C02765	--	7028	Alkaloids	Amphetamine alkaloids	1002.93	333.35	224.53	2300.87	2203.94	554.4	4770.46	3258.4	3349.41	7866.69	3227.37	5138.61
MEDP0234	D-Glucono-1,5-Lactone	C6H10O6	180.0585	178.0477	0.9692	0.8656	90-80-2	HMDB0000150	C00198	--	7027	Carboxylic acids and derivatives	Carboxylic acids and derivatives	20436.6	17315.42	18640.31	11596.59	12637.43	13536.93	11476.69	10526.15	11679.79	12972.02	11336.42	9112.9
MW0114753	Lobeline	C22H27NO2	384.2183	337.2042	0.535	8.9841	90-69-7	--	C07475	--	3945	Organic oxygen compounds	Organooxygen compounds	156.21	1296.06	1058.7	428.71	1737.67	1122.23	354.04	303.23	117.59	462.93	473.84	282.04
MW0132537	3,4,5-Trimethoxycinnamic acid	C12H14O5	239.0889	238.0841	0.5312	5.0707	90-50-6	HMDB0124869	--	--	735755	Phenylpropanoids and polyketides	Cinnamic acids and derivatives	18960.46	18755.27	19569.7	18606.6	17300.46	19689.69	17239.22	17735.05	672.76	17804.74	18394.23	20598.95
MW0126966	Xanthone	C13H8O2	197.0598	196.0524	0.6469	1.9001	90-47-1	--	--	--	7020	Organoheterocyclic compounds	Benzopyrans	1257.23	1954.75	1711.78	2626.37	2251.53	1606.93	5262.9	4675.76	6159.69	3449.32	6440.75	5926.39
MEDL02051	7-Hydroxy-4-methylcoumarin	C10H8O3	177.0545	176.0474	0.7771	7.2205	90-33-5	HMDB0059622	C03081	--	5280567	Lignans and Coumarins	Coumarins	3437.16	3197.06	3396.06	3803.82	3081.0	3394.55	3193.53	3419.28	3323.04	3465.02	3359.46	3535.48
MEDN1502	2-Phenylbutyric acid	C10H12O2	166.0943	164.0837	0.9682	4.8358	90-27-7	HMDB0000329	-	--	7012	Organic acid And Its derivatives	Organicacid and Its derivatives	20599.6	21465.43	20257.36	20775.8	19763.86	19887.25	18256.27	19382.58	20224.31	21556.85	21628.12	20963.65
MW0003138	2-Hydroxybenzenemethanol	C7H8O2	125.0597	124.0524	0.7753	3.592	90-01-7	HMDB0059709	C02323	--	5146	Benzenoids	Benzene and substituted derivatives	2638.48	2846.94	3880.77	2219.72	2032.28	2506.39	2237.6	2079.62	2520.67	2245.54	2463.97	2807.43
MW0121083	5-Amino-1-(2-pyrimidinyl)-1H-pyrazole-4-carbonitrile	C8H6N6	262.9844	186.0654	0.6433	0.3859	89978-00-7	--	--	--	11988225	Organoheterocyclic compounds	Diazines	2701.2	2033.15	2571.25	2227.47	1341.94	1960.46	2556.54	2358.39	2141.16	1783.35	1806.0	2954.13
MW0116397	1-(3-Phenyl-6,7-dihydro-2H-pyrazolo[4,3-c]pyridin-5(4H)-yl)propan-1-one	C15H17N3O	528.308	255.1372	0.6341	10.0306	899378-40-6	--	--	--	7694334	Organoheterocyclic compounds	Azoles	3874.53	3754.37	3834.55	3671.5	3940.3	2598.31	4294.81	4075.26	4782.6	3369.87	3898.93	4422.03
MEDN0491	9(S)-HOTrE	C18H30O3	277.2164	294.2195	0.6984	8.3938	89886-42-0	HMDB0031934	-	--	6439873	Oxidized lipids	Oxidized lipids	22967.11	25900.57	33123.28	13644.41	20428.27	26806.71	19979.2	21599.47	33690.45	23773.95	25144.24	19129.48
MW0116306	1-(2-Chloro-6-fluorobenzyl)piperidine-4-carboxylic acid	C13H15ClFNO2	318.0903	271.0775	0.6482	6.4919	897094-28-9	--	--	--	3943794	Organoheterocyclic compounds	Piperidines	1603.64	1417.86	1798.2	1361.63	600.5	1458.37	1655.19	1639.82	1723.45	1309.97	1308.03	1694.8
MW0103621	N6-2-(4-Aminophenyl)ethyladenosine	C18H22N6O4	369.1664	386.1703	0.6071	1.8707	89705-21-5	--	--	--	9952135	Nucleosides, nucleotides, and analogues	Purine nucleosides	17107.85	9153.97	13634.46	12900.47	11387.45	13827.13	11867.21	14103.85	14907.95	12537.42	16938.47	12956.08
MW0015775	Androsta-1,4-diene-3,17-dione	C19H24O2	353.1721	284.1776	0.6057	7.0274	897-06-3	HMDB0003422	C20144	--	13472	Lipids and lipid-like molecules	Steroids and steroid derivatives	1400.42	649.93	642.75	1049.01	1044.5	996.81	1886.96	1508.97	1726.04	1562.64	2093.62	1833.24
MW0128691	[3,3'-Bi-4H-1-benzopyran]-4,4'-dione, 2,2',3,3'-tetrahydro-5,5',7,7'-tetrahydroxy-2,2'-bis(4-methoxyphenyl)-	C32H26O10	647.0741	570.1526	0.7881	0.6587	89595-71-1	--	--	--	57509362	Phenylpropanoids and polyketides	Flavonoids	61569.24	43121.9	47440.88	61961.24	51847.08	50718.78	55672.57	56316.97	58159.19	57320.5	48206.3	57056.45
MEDP1160	LPE(18:1/ 0:0)	C23H46NO7P	480.3088	479.3012	0.8656	8.9849	89576-29-4	-	-	--	--	GP	PE	295230.48	309108.12	210227.17	326755.19	293365.18	263444.03	257316.07	289362.5	274906.73	305731.9	374157.8	290746.47
MW0157528	Thiotropocin	C8H4O3S2	446.907	211.9602	0.7307	10.2669	89550-93-6	--	C12105	--	55977	Hydrocarbon derivatives	Tropones	8470.01	9554.29	8952.91	8392.87	10123.88	8158.44	9690.46	9154.5	8840.54	7887.85	7416.05	8543.62
MW0120183	4-Amino-2-(methylthio)pyrimidine-5-carboxamide	C6H8N4OS	386.1178	184.0419	0.8875	9.422	89533-28-8	--	--	--	225432	Organoheterocyclic compounds	Diazines	9047.9	10532.93	14602.15	6072.7	8693.5	9735.23	5932.04	5444.9	5448.16	6468.74	6543.22	5828.42
MW0125453	N'-(7-Fluoropyrrolo[1,2-a]quinoxalin-4-yl)pyrazinohydrazide	C16H11FN6O	399.0169	322.0978	0.6461	0.9112	895158-95-9	--	--	--	400169	Organoheterocyclic compounds	Diazanaphthalenes	4086.47	4494.19	3212.2	2963.27	3568.58	4335.74	4400.37	3981.11	5420.64	4654.26	6199.14	5063.28
MW0007665	Methyl 2-(Cbz-amino)-2-(tetrahydrothiopyran-4-ylidene)acetate	C16H19NO4S	660.2403	321.1035	0.6235	4.8503	894790-18-2	--	--	--	58678801	Benzenoids	Benzene and substituted derivatives	5077.92	4774.06	4145.79	4136.5	4416.85	3805.53	2959.86	2882.11	3756.99	3562.56	3109.61	3242.01
MW0116646	1,3-Dichloro-5-ethyl-5-methyl-1,3-diazolidine-2,4-dione	C6H8Cl2N2O2	442.9825	209.9963	0.6074	0.5547	89415-87-2	--	--	--	62299	Organoheterocyclic compounds	Azolidines	3818.63	3414.85	1912.01	1096.97	2485.81	4236.72	2573.78	2515.27	2641.98	2372.94	2495.32	1737.23
MW0145154	Anthemis glycoside A	C39H49NO21	914.2913	867.2797	0.6091	0.6295	89354-48-3	--	C08326	--	5281121	Organic oxygen compounds	Organooxygen compounds	1422.03	467.47	1260.52	1365.59	1076.68	1372.19	3631.13	1747.57	2902.58	2839.82	3344.88	3164.6
MW0103753	3-Nitro-6-(trifluoromethyl)pyridin-2-amine	C6H4F3N3O2	432.085	207.0256	0.6497	13.5759	893444-21-8	--	--	--	53404040	Organic 1,3-dipolar compounds	Allyl-type 1,3-dipolar organic compounds	9264.22	7141.61	10239.31	11224.71	21593.64	31082.79	17679.4	10187.27	15410.94	9954.49	7117.58	14831.58
MW0120993	5,7-Dichloro-1,2,3,4-tetrahydroisoquinoline	C9H9Cl2N	425.0113	201.0112	0.6209	0.5547	89315-56-0	--	--	--	12595073	Organoheterocyclic compounds	Tetrahydroisoquinolines	34301.77	31901.57	35536.51	35751.94	33852.3	36728.32	29795.23	27204.53	29959.73	26020.71	31999.8	28948.82
MW0007144	Ferimzone	C15H18N4	255.1479	254.1531	0.7714	5.3226	89269-64-7	--	C18579	--	9013425	Benzenoids	Benzene and substituted derivatives	6045.32	6628.86	4221.97	7858.5	5129.39	8125.06	8790.43	10440.73	1661.2	6574.21	9658.37	11067.43
MW0143601	5-Deoxy-5-chloroadenosine	C10H12ClN5O3	593.1152	285.0629	0.6463	1.7841	892-48-8	--	C19768	--	5327118	Nucleosides, nucleotides, and analogues	5'-deoxyribonucleosides	3439.84	4791.02	2464.49	5166.91	8212.14	4025.9	2946.99	4370.45	3157.38	3781.53	3626.9	3265.39
MW0118491	2-Cyclopentyl-4-(5-phenyl-1H-pyrrolo[2,3-b]pyridin-3-yl)benzoic acid	C25H22N2O2	803.2993	382.1681	0.6424	1.7841	890842-28-1	--	--	--	25022668	Organoheterocyclic compounds	Pyridines and derivatives	7581.72	1885.7	7985.4	7332.47	7609.76	5909.69	26.48	924.99	2524.62	371.07	1736.42	491.07
MW0110590	1,2-Bis(heptanoylthio) glycerophosphocholine	C22H44NO6PS2	536.227	513.2348	0.5391	8.8063	89019-63-6	--	--	63009	57369907	Organic nitrogen compounds	Organonitrogen compounds	3018.47	1421.48	662.18	2950.62	2040.44	946.55	2893.91	3105.18	3267.32	2635.83	1979.03	3007.13
MEDP0150	2'-Deoxyinosine	C10H12N4O4	253.0821	252.0859	0.8267	1.7101	890-38-0	HMDB0000071	C05512	--	135398593	Nucleotide And Its metabolomics	Nucleotide and Its metabolomics	1387.66	235.62	173.61	2454.67	669.11	260.02	7059.76	6197.77	7487.74	2775.45	8419.86	7019.03
MEDP1026	2,4-Dihydroxy Benzoic Acid	C7H6O4	137.0241	154.02700000000002	0.6218	11.7893	89-86-1	HMDB0029666	-	--	1491	Benzene and substituted derivatives	Phenolic acids	6186.76	6340.18	5646.5	6909.33	5083.57	4265.12	3865.05	5325.38	3518.09	5988.9	5601.84	5448.54
MEDN1422	8(S)-HETrE	C20H34O3	369.2623	322.2508	0.5195	7.4924	889573-69-7	-	-	--	53394269	Oxidized lipid	Oxidized lipid	50.19	1407.74	1159.69	1848.92	1728.63	113.3	2836.31	4423.9	3548.19	2983.19	4084.98	3403.8
MW0146527	Bafilomycin B1	C44H65NO13	879.4613	815.4456	0.6461	4.1333	88899-56-3	--	--	--	6440917	Phenylpropanoids and polyketides	Macrolides and analogues	5297.69	6032.1	7176.75	7120.61	6782.32	5839.64	14090.52	10729.47	1167.79	8730.57	13403.35	14225.7
MW0146526	Bafilomycin A1	C35H58O9	645.3979	622.4081	0.6265	10.9775	88899-55-2	--	--	--	6436223	Phenylpropanoids and polyketides	Macrolides and analogues	4297.24	6480.24	2567.18	3923.12	5597.35	3864.05	2271.43	1846.28	3370.76	2132.26	2804.7	1109.37
MW0103430	8-Hydroxy-2'-deoxyguanosine	C10H13N5O5	306.0812	283.0917	0.5967	1.4895	88847-89-6	HMDB0003333	--	--	135440064	Nucleosides, nucleotides, and analogues	Purine nucleosides	101339.0	93054.41	121506.0	89628.21	83196.03	110647.5	52133.84	55484.31	50830.01	50237.53	56222.54	49530.85
MW0111203	Nervonoyl ethanolamide	C26H51NO2	476.3468	409.392	0.5521	10.0462	887405-21-2	--	--	--	24762162	Organic nitrogen compounds	Organonitrogen compounds	4535.19	4833.99	7341.59	3148.43	4411.38	4613.9	3860.07	4985.85	4543.04	3676.34	3634.37	4301.06
MW0115591	1-(Trifluoromethyl)-1,2-benziodoxol-3(1H)-one	C8H4F3IO2	357.955	315.9208	0.6219	0.539	887144-94-7	--	--	--	24850981	Organohalogen compounds	Aryl halides	6602.57	6550.03	7148.9	40635.78	8331.57	5642.2	7748.5	6493.27	5441.27	6810.18	7158.09	6736.69
MW0007508	Liranaftate	C18H20N2O2S	485.1033	328.1245	0.912	0.5625	88678-31-3	--	D01550	--	3936	Benzenoids	Tetralins	4947.42	4564.73	5627.35	3695.05	4606.63	2750.18	3621.97	2960.91	3261.18	3344.15	4837.83	3739.36
MW0126675	tert-Butyl 3-(2-fluorophenyl)-1-piperazinecarboxylate	C15H21FN2O2	319.122	280.1587	0.6417	5.8868	886767-09-5	--	--	--	71298764	Organoheterocyclic compounds	Diazinanes	4526.48	5895.06	5036.32	4443.05	5717.13	5683.95	5962.97	7173.56	5598.73	4956.51	5828.55	4887.36
MW0007865	Myclobutanil	C15H17ClN4	577.2356	288.1142	0.6462	3.0518	88671-89-0	--	C18477	72283	6336	Benzenoids	Benzene and substituted derivatives	2667.46	3331.43	5844.11	3768.04	3397.56	3301.63	4083.33	3601.86	4198.61	4042.24	3886.97	4492.94
MW0125378	N-(3-Piperidinyl)propanamide	C8H16N2O	201.0974	156.1263	0.6371	0.5539	886504-11-6	--	--	--	3520588	Organoheterocyclic compounds	Piperidines	11021.36	6175.71	7827.76	12578.09	4823.91	8351.41	6212.82	7404.71	4696.78	7007.68	7097.75	3004.25
MW0004821	4-Chloro-3-(trifluoromethoxy)phenol	C7H4ClF3O2	212.9921	211.9852	0.6219	0.445	886500-85-2	--	--	--	17750695	Benzenoids	Phenol ethers	5070.72	5546.47	4383.81	4839.6	6175.07	4451.78	4957.84	4488.2	4462.86	5772.71	4637.48	3892.47
MW0002895	2-Chloro-6-(trifluoromethyl)benzyl alcohol	C8H6ClF3O	174.9919	210.0059	0.6437	12.9537	886500-21-6	--	--	--	17750680	Benzenoids	Benzene and substituted derivatives	699.69	689.85	308.92	1544.9	798.52	1462.86	494.1	749.45	101.81	608.34	2214.73	1244.62
MW0117166	1-Isonicotinoyl-4-piperidinylamine	C11H15N3O	223.1554	205.1215	0.6479	2.3453	886497-91-2	--	--	--	4778217	Organoheterocyclic compounds	Pyridines and derivatives	8658.77	11278.05	14202.32	7767.4	11715.53	11683.69	10260.53	8749.45	9716.07	9889.19	11291.76	9297.82
MW0140083	(+)-8-Hydroxycalamenene	C15H22O	265.1799	218.1671	0.6481	0.4492	88642-92-6	--	C09938	--	442519	Lipids and lipid-like molecules	Prenol lipids	5241.42	4855.73	4420.59	6123.4	4783.19	5606.64	7175.54	9777.93	7487.6	9487.17	8982.0	7346.11
MW0115798	(1-Phenyl-1H-1,2,3-triazol-4-yl)methanamine	C9H10N4	197.0788	174.0905	0.7225	2.7447	886361-75-7	--	--	--	18526002	Organoheterocyclic compounds	Azoles	2085.02	1996.0	2112.23	1855.34	1727.42	1184.04	1665.89	1841.52	3118.71	3252.75	2220.83	1641.54
MW0147432	Chlorphenesin carbamate	C10H12ClNO4	268.035	245.0455	0.8842	0.5687	886-74-8	HMDB0003551	C07930	--	2724	Benzenoids	Phenol ethers	373426.65	364234.71	376780.46	377283.77	391782.53	371212.36	354841.48	317101.54	339756.65	314775.13	377126.04	338690.52
MW0119841	4-(2-Ethyl-2-methyltetrahydro-2H-pyran-4-yl)-1,3-thiazol-2-amine	C11H18N2OS	293.0671	226.114	0.6374	4.5821	88572-17-2	--	--	--	2833394	Organoheterocyclic compounds	Azoles	1491.29	1620.91	1783.79	1258.0	1855.29	1639.9	1916.63	2049.89	1980.73	1989.9	2043.08	2008.91
MW0005145	4-Iodopiperidine-1-carboxylic acid benzyl ester	C13H16INO2	729.0104	345.0226	0.5653	0.5533	885275-00-3	--	--	--	53249826	Benzenoids	Benzene and substituted derivatives	3664.31	2087.7	3207.42	2530.12	2197.3	2511.67	2507.31	1741.58	692.65	1815.55	1417.77	2467.16
MW0002320	2,5-Dichloro-N,N-dimethylbenzenesulfonamide	C8H9Cl2NO2S	299.9861	252.9731	0.6334	0.5246	88522-19-4	--	--	--	779173	Benzenoids	Benzene and substituted derivatives	6170.88	7676.85	7589.06	7349.79	7178.45	7709.67	7010.43	6260.55	6767.51	6461.82	7270.68	6157.54
MW0010622	Manassantin A	C42H52O11	755.3442	732.3510000000001	0.9659	7.403	88497-87-4	--	--	--	10190528	Lignans, neolignans and related compounds	Furanoid lignans	2646.49	14425.37	7158.97	15801.68	18445.6	7043.78	152.05	245.87	270.52	7834.53	1045.11	233.22
MW0115667	5-Chloro-1,3-dimethyl-1H-pyrazole-4-sulfonyl chloride	C5H6Cl2N2O2S	294.9057	227.9527	0.6238	0.3748	88398-93-0	--	--	--	2777126	Organohalogen compounds	Aryl halides	9649.6	8215.95	8235.91	7898.57	7130.53	7125.44	8156.51	7148.63	6936.76	7139.86	6275.6	7208.48
MW0149575	Gibberellin A44 diacid;Gibberellin A44 open lactone	C20H28O6	348.1889	364.1886	0.9792	7.3533	88373-65-3	--	C06095	--	440915	Lipids and lipid-like molecules	Prenol lipids	42064.3	11550.09	10526.6	30523.94	7237.73	13347.52	1496.67	1672.21	126.46	2531.34	989.36	989.04
MW0104693	2-Bromo-N-cyclopentylacetamide	C7H12BrNO	448.9837	205.0102	0.6438	0.6879	883521-80-0	--	--	--	10584382	Organic acids and derivatives	Carboxylic acids and derivatives	3912.73	1571.8	2316.1	4018.75	2727.91	1614.64	2533.79	3887.63	2467.65	3500.22	1462.45	2524.68
MW0116254	1-(1,4'-Bipiperidin-3-yl)-N,N-dimethylmethanamine	C13H27N3	264.1804	225.2205	0.5729	3.6405	883515-98-8	--	--	--	23004742	Organoheterocyclic compounds	Piperidines	5439.2	6246.2	5857.11	5598.66	6624.1	7067.84	6871.44	8741.76	6532.41	8305.88	7831.13	8082.27
MW0005534	5-{[4-(Trifluoromethoxy)phenyl]amino}-1,3,4-thiadiazole-2-thiol	C9H6F3N3OS2	335.0243	292.9904	0.6422	2.9048	883041-73-4	--	--	--	2732843	Benzenoids	Phenol ethers	5613.89	4376.65	4958.16	3053.67	2543.71	5189.79	1069.51	537.19	766.05	754.3	1069.7	691.3
MW0148931	ent-Fisetinidol-(4beta->8)-catechin-(6->4beta)-ent-fisetinidol	C45H38O16	852.2493	834.216	0.8788	11.2371	88269-47-0	--	C10225	--	442680	Phenylpropanoids and polyketides	Flavonoids	14832.45	9070.12	9500.15	20810.76	6237.87	76753.02	20693.09	186242.02	17506.03	5419.61	3355.87	4781.03
MW0155635	PM-Toxin A	C33H60O8	602.4622	584.4288	0.6245	11.0708	88212-12-8	--	C08553	--	159223	Lipids and lipid-like molecules	Fatty Acyls	3265.1	267.21	11737.49	545.07	942.03	8206.51	789.58	209.54	564.03	216.97	1517.6	1073.13
MW0106096	Calpain Inhibitor III	C22H26N2O4	449.1424	382.1893	0.6393	6.9837	88191-84-8	--	--	--	11199915	Organic acids and derivatives	Carboxylic acids and derivatives	1372.83	1086.4	1317.78	1457.39	1958.43	1828.56	2033.44	2461.49	2148.15	2182.87	2728.37	3373.3
MW0114415	Ethanone, 1-[2-hydroxy-3-propyl-4-[4-(2H-tetrazol-5-yl)butoxy]phenyl]-	C16H22N4O3	365.1809	318.1692	0.5764	3.2511	88107-10-2	--	D02851	43454	3969	Organic oxygen compounds	Organooxygen compounds	201730.64	230270.05	347546.06	235671.59	265516.36	223285.74	249073.25	233358.06	225750.59	263005.98	283602.59	260691.94
MW0054417	LTB3	C20H34O4	339.2537	338.2457	0.5919	9.1022	88099-35-8	--	--	43393	3906	--	--	812743.2	928626.16	978834.54	672764.7	885152.69	898348.61	787437.12	716560.4	669542.13	1000539.8	993516.72	784031.41
MW0008500	N-(6-Amino-1-butyl-2,4-dioxo-1,2,3,4-tetrahydro-5-pyrimidinyl)-N-methylbenzamide	C16H20N4O3	633.3142	316.1535	0.6407	6.202000000000001	880426-02-8	--	--	--	8917951	Benzenoids	Benzene and substituted derivatives	1144.29	4581.75	4670.66	1834.03	5412.71	4898.4	1204.83	2131.34	1863.6	2129.99	2659.73	1832.08
MW0001988	2-(Aminomethyl)-4-(tert-butyl)-6-(methylsulfonyl)phenol	C12H19NO3S	553.1809	257.1086	0.6155	4.6571	88041-40-1	--	--	--	3038493	Benzenoids	Benzene and substituted derivatives	10208.45	7062.31	2658.09	2851.43	2408.47	4350.71	2184.37	685.38	1447.93	1149.26	1544.36	1437.61
MW0002415	2,6-Di-tert-butyl-4-hydroxymethylphenol	C15H24O2	219.1743	236.1776	0.8646	5.0265	88-26-6	HMDB0032048	--	--	6929	Benzenoids	Benzene and substituted derivatives	64225.08	64195.35	64906.74	62748.04	63957.84	66371.93	63404.06	62029.24	62267.37	63094.38	61521.07	61777.5
MEDN1308	2-Ethylbutyric Acid	C6H12O2	233.1747	116.0837	0.6484	4.4192	88-09-5	HMDB0031221	-	--	6915	Organic acid And Its derivatives	Organicacid and Its derivatives	10836.77	17961.36	6720.29	14713.82	16670.62	15169.09	1430.24	16565.19	20168.33	23894.53	20014.57	22694.07
MW0142038	2,4,6-Trihydroxytoluene;2-Methylphloroglucinol	C7H8O3	105.0334	140.0473	0.8259	9.3218	88-03-9	--	C16401	--	66606	Benzenoids	Phenols	11154.53	11331.02	11746.42	11621.92	11095.09	9703.15	12471.51	12448.98	11688.22	12016.8	11017.54	11870.84
MW0142036	2,4,6-Triaminotoluene	C7H11N3	276.2043	137.0953	0.8519	7.3535	88-02-8	--	C16400	--	66605	Benzenoids	Benzene and substituted derivatives	8249.73	11081.12	13609.29	5590.48	11348.23	12678.69	6414.01	6568.09	5636.61	6288.66	7991.83	5984.24
MW0012348	13S-Hydroxy-9Z,11E,15Z-octadecatrienoic acid	C18H30O3	295.2269	294.2195	0.5746	9.1322	87984-82-5	--	C16316	36051	16061072	Lipids and lipid-like molecules	Fatty Acyls	7263.96	4822.58	3381.06	14314.14	12476.66	6121.48	17308.14	19168.09	20068.28	17784.12	20077.11	10655.52
MW0103842	(2-Methyl-6,7-dihydro-1H-[1,4]dioxino[2,3-f]benzimidazol-1-yl)acetic acid	C12H12N2O4	293.0511	248.0797	0.6421	0.2646	879045-15-5	--	--	--	6485563	Organic acids and derivatives	Carboxylic acids and derivatives	12787.07	11349.42	14160.63	4031.21	12372.66	11524.98	11078.27	13450.56	10844.01	17757.91	15208.33	10657.72
MEDP0529	Indole-3-acetamide	C10H10N2O	175.0863	174.0793	0.7498	1.3013	879-37-8	HMDB0029739	C02693	--	397	Heterocyclic compounds	Indole and Its derivatives	5145.76	791.66	1026.97	13483.19	8695.44	320.56	7114.5	8815.91	8857.09	8825.81	8545.21	7460.05
MW0012435	15-Deoxy-.DELTA.12,14-prostaglandin J2	C20H28O3	299.2005	316.2038	0.9516	7.9844	87893-55-8	HMDB0005079	C14717	--	5311211	Lipids and lipid-like molecules	Fatty Acyls	5014.68	6734.78	5200.04	3923.36	5024.96	5366.86	3150.85	4130.84	2942.31	4566.6	3928.63	3390.1
MW0049196	delta-12-Prostaglandin J2	C20H30O4	318.2148	334.2144	0.9794	7.9843	87893-54-7	HMDB0004238	C05958	--	5280885	Lipids and lipid-like molecules	Fatty Acyls	6566.22	7583.55	7905.63	4227.28	6509.59	7174.1	3918.84	3910.74	4229.11	5025.54	4748.6	4537.58
MW0005732	5-Phenylpent-4-enyl-1-hydroperoxide	C11H14O2	223.0646	178.0994	0.5035	5.5304	87864-20-8	--	--	64860	6438577	Benzenoids	Benzene and substituted derivatives	12432.54	16369.85	2185.89	21650.78	22267.11	14787.21	23619.99	17468.41	1174.51	18883.78	16469.9	16796.66
MW0115381	Tralkoxydim	C20H27NO3	330.2058	329.1991	0.6111	2.3368	87820-88-0	--	C18769	72540	135492483	Organic oxygen compounds	Organooxygen compounds	1590.19	1709.36	2602.88	1290.04	1412.39	2386.33	1677.99	883.87	1285.87	1877.04	498.92	302.76
MW0147494	Cinmethylin	C18H26O2	275.2008	274.1933	0.56	8.687999999999999	87818-31-3	--	C10903	--	91745	Lipids and lipid-like molecules	Prenol lipids	5933.41	9503.11	8190.03	6074.13	8462.63	8229.64	7372.32	3994.59	13527.54	5777.69	8351.93	4184.6
MW0155602	Plakortic acid	C17H30O4	281.2111	298.2144	0.6594	6.8053	87803-10-9	--	C17158	--	10402441	Organoheterocyclic compounds	Dioxanes	3535.42	2581.69	2264.21	2409.53	2807.29	4495.8	5229.81	3801.71	4261.4	6080.76	6982.1	5677.56
MW0111073	Leukotriene B4 ethanolamide	C22H37NO4	402.2634	379.2723	0.7365	4.582	877459-63-7	HMDB0002304	--	36243	5283127	Organic nitrogen compounds	Organonitrogen compounds	2708.61	18179.06	14896.11	23166.51	41721.32	20577.76	2158.97	1313.65	1989.29	6297.17	2338.58	1075.74
MW0116401	1-(4-Boc-piperidyl)-4-iodopyrazole	C13H20IN3O2	777.1077	377.06	0.8358	0.6061	877399-73-0	--	--	--	45480389	Organoheterocyclic compounds	Piperidines	2389.92	3055.22	1740.16	2908.97	1449.87	910.48	2451.32	1240.24	517.14	1184.48	893.98	1303.49
MW0004721	4-Bromo-2-fluoro-N-isopropylbenzamide	C10H11BrFNO	556.9648	259.0008	0.8984	0.5588	877383-76-1	--	--	--	24710073	Benzenoids	Benzene and substituted derivatives	13935.4	9876.1	12847.74	6309.76	7598.09	10388.15	2939.94	1948.39	4281.04	1309.17	4233.95	2178.28
MW0108900	N-Phenethylacetamide	C10H13NO	349.1861	163.0997	0.5753	3.0436	877-95-2	--	C06746	--	70143	Organic acids and derivatives	Carboxylic acids and derivatives	105748.55	123681.85	130311.27	116976.31	176292.01	127465.82	136353.5	124785.54	126739.2	128853.45	195891.83	140396.24
MEDL01744	Heterophylliin A	C34H26O22	900.965	786.0916	0.5961	0.6737	87687-52-3	HMDB0039264	-	--	471120	Tannins	Tannin	3404.82	3670.75	3437.16	4549.28	4696.8	5023.57	2558.03	2776.75	3713.34	2390.11	2066.91	4588.08
MW0156556	Scabraside	C40H44O20	809.2284	844.2426	0.6398	2.1137	87686-79-1	--	C17918	--	159134	Organic acids and derivatives	Carboxylic acids and derivatives	181.97	503.13	785.22	488.53	1525.03	809.69	807.63	951.03	956.41	975.46	1619.72	1053.05
MW0109998	Trandolaprilat	C22H30N2O5	403.223	402.2155	0.7417	3.3927	87679-71-8	HMDB0060583	C21515	--	5464097	Organic acids and derivatives	Carboxylic acids and derivatives	7181.86	7356.01	7414.72	11825.77	11726.61	8398.24	12157.86	9808.42	10968.97	8899.6	13475.42	11076.04
MW0109997	Trandolapril	C24H34N2O5	431.259	430.2468	0.5202	3.7197	87679-37-6	HMDB0014660	--	--	13069290	Organic acids and derivatives	Carboxylic acids and derivatives	169937.11	185568.77	174343.32	185333.45	183877.5	189323.05	184811.31	202449.11	184629.44	194358.16	190061.93	184037.97
MW0123698	Dimethenamid	C12H18ClNO2S	298.0585	275.0747	0.7303	4.8503	87674-68-8	--	C18499	--	91744	Organoheterocyclic compounds	Heteroaromatic compounds	20484.35	21797.72	24123.5	22246.28	22488.6	22541.67	18203.77	17327.32	19510.44	19068.58	17832.75	15916.39
MW0114672	Kelampayoside A	C20H30O13	443.1576	478.1686	0.5422	6.7551	87562-76-3	HMDB0038714	--	--	23928091	Organic oxygen compounds	Organooxygen compounds	15312.97	18827.78	26050.56	11909.72	15224.05	18947.16	11814.06	12709.39	12273.99	12812.03	14262.5	11954.33
MW0124134	Flumiclorac-pentyl	C21H23ClFNO5	869.2388	423.1249	0.6393	0.8364	87546-18-7	HMDB0034860	C10990	--	443048	Organoheterocyclic compounds	Pyrrolines	12571.69	11572.26	11552.89	17832.22	19779.75	12127.51	14334.51	15329.3	13941.16	8752.33	18383.22	19072.25
MW0005128	4-Imidazolidinone, 3-decyl-5,5-diphenyl-2-thioxo-	C25H32N2OS	472.2394	408.2235	0.647	3.9964	875014-22-5	--	--	--	11502403	Benzenoids	Benzene and substituted derivatives	4827.46	2426.52	2224.58	2203.47	1290.02	3194.52	882.97	1108.04	603.27	1128.57	1927.02	1305.42
MW0119637	3'-Hydroxyrepaglinide	C27H36N2O5	469.2768	468.2624	0.6169	2.6588	874908-14-2	HMDB0060979	--	--	46781896	Organoheterocyclic compounds	Piperidines	2736.58	4666.26	8797.36	5589.73	6009.56	2932.28	2810.6	2373.41	4518.42	8513.35	5679.45	2937.29
MW0002478	2-[(4-Amino-6-anilino-1,3,5-triazin-2-yl)methoxy]benzaldehyde	C17H15N5O2	643.2524	321.1226	0.6495	0.6289	874758-35-7	--	--	--	1972117	Benzenoids	Phenol ethers	3642.72	2683.66	1008.2	1367.9	1428.12	2657.98	4555.92	4065.13	4261.29	2613.16	5112.07	4442.62
MW0148270	Denudatin B	C21H24O5	374.1964	356.1624	0.6442	6.1997	87402-88-8	--	C10554	--	442834	Phenylpropanoids and polyketides	2-arylbenzofuran flavonoids	4368.46	2067.57	1933.56	4465.14	2038.66	1450.86	61.43	63.84	76.96	141.42	185.66	517.87
MW0116783	1-[3-(Trifluoromethyl)-2-pyridinyl]piperazine	C10H12F3N3	298.0517	231.0983	0.6464	5.5153	87394-63-6	--	--	--	2777786	Organoheterocyclic compounds	Diazinanes	13564.21	7176.38	6797.5	18017.71	16605.64	6202.3	9017.14	12238.56	12038.11	17304.73	10866.3	12903.29
MW0000965	[5-(1H-Pyrrolo[2,3-b]pyridin-3-ylmethyl)-2-pyridyl]-[4-(trifluoromethyl)benzyl]amine	C21H17F3N4	383.1479	382.1405	0.6417	4.2121	873786-09-5	--	--	--	11545419	Benzenoids	Benzene and substituted derivatives	3692.34	3759.53	3641.03	3928.68	1940.41	3366.41	605.11	2495.94	2913.59	6226.82	2665.06	3157.51
MW0109524	Ramipril	C23H32N2O5	439.2152	416.2311	0.5513	4.5677	87333-19-5	HMDB0014324	D00421	2243	5362129	Organic acids and derivatives	Carboxylic acids and derivatives	3721.77	3913.07	3473.11	3346.01	1369.34	4812.42	1973.68	2583.09	3660.98	335.59	748.41	1972.18
MW0002388	2,6-Difluoro-α-methylbenzenemethanol	C8H8F2O	123.0403	158.0543	0.639	0.569	87327-65-9	--	--	--	5012075	Benzenoids	Benzene and substituted derivatives	6505.66	6202.78	2109.29	7191.87	7659.06	7592.2	6858.77	6587.95	6744.72	5862.04	9171.59	8008.98
MW0106072	Butanoic acid, 4-((1,2-dioxohexadecyl)amino)-, ethyl ester	C22H41NO4	384.3081	383.3036	0.7714	5.7978	873079-69-7	--	--	64840	15950454	Organic acids and derivatives	Carboxylic acids and derivatives	9934.47	8230.1	11468.24	9217.41	15808.74	12615.22	14769.39	14120.02	19919.45	16257.13	15842.12	20463.4
MW0053901	Hexadecanedioic acid, 3,3,14,14-tetramethyl-	C20H38O4	702.5897	342.277	0.5737	11.0892	87272-20-6	--	--	62960	121871	Lipids and lipid-like molecules	Fatty Acyls	1560.87	592.93	426.9	794.88	1972.59	338.94	1529.71	189.68	341.31	2197.99	1124.14	47.62
MW0108798	N-Hexadecanoyl-L-homoserine lactone	C20H37NO3	406.2306	339.2773	0.649	2.3453	87206-01-7	--	--	45449	11609787	Organic acids and derivatives	Carboxylic acids and derivatives	1485.1	1638.14	1941.9	1275.26	1733.57	1622.6	1904.93	1832.3	1018.88	2546.17	2005.66	1808.61
MEDP1982	2-Methyl-1-Pyrroline	C5H9N	84.0808	83.0735	0.7662	1.0785	872-32-2	-	C20808	--	70103	Heterocyclic compounds	Heterocyclic compounds	3031.61	8105.01	3163.69	4412.91	4379.77	2809.17	3594.92	4722.97	5240.17	9691.76	5702.36	4254.35
MEDL02686	Caffeoylcholine	C14H20NO4+	571.2116	266.124	0.6295	3.7032	87189-10-4	HMDB0136312	-	--	6440794	Alkaloids	Alkaloids	12.8	288.88	604.07	623.33	1566.73	138.76	1978.6	957.89	1843.08	216.63	1566.6	2577.15
MW0001554	1-Cinnamylpiperazine	C13H18N2	220.1814	202.14700000000002	0.6096	12.8181	87179-40-6	--	--	--	726896	Benzenoids	Benzene and substituted derivatives	58570.32	92451.03	74825.19	53730.72	61139.77	54407.06	96153.62	121686.05	65931.86	35611.85	74312.37	60126.66
MW0005858	7-Chloro-N-(4-nitrophenyl)thiazolo[5,4-d]pyrimidin-2-amine	C11H6ClN5O2S	371.0088	306.9931	0.6472	2.9245	871266-83-0	--	--	--	11630922	Benzenoids	Benzene and substituted derivatives	1775.79	2375.1	1354.96	3239.75	4375.48	2200.93	5710.26	5326.48	4628.26	6906.72	5230.61	6098.18
MW0110241	Tyr-Asp	C13H16N2O6	631.1614	296.1008	0.5770000000000001	1.1651	87085-11-8	HMDB0029101	--	--	9817652	Organic acids and derivatives	Carboxylic acids and derivatives	21177.07	38914.07	24627.63	57283.13	60998.1	26939.73	28491.9	17583.1	26947.93	18389.83	25822.96	21905.96
MW0054311	Leptomycin B	C33H48O6	523.3422	540.3451	0.6255	7.5742	87081-35-4	--	--	--	71684517	Lipids and lipid-like molecules	Fatty Acyls	2084.75	2643.62	2450.39	1195.43	987.81	1484.47	2338.65	2313.79	2317.19	3198.53	3143.43	1373.49
MW0009640	rac-4-Sulfoxypropranolol	C16H21NO6S	711.2254	355.10900000000004	0.6425	7.7188	87075-33-0	--	--	--	135862	Benzenoids	Naphthalenes	8809.62	9946.44	10903.44	10064.69	10393.37	9409.07	11057.33	13631.4	13624.41	10910.64	10303.51	12029.63
MW0119043	3-(4-Fluorophenyl)-1H-pyrazole-5-carboxylic acid	C10H7FN2O2	229.0384	206.0492	0.6495	0.5389	870704-22-6	--	--	--	940540	Organoheterocyclic compounds	Azoles	5658.02	4579.12	5043.46	5939.49	3419.23	4620.29	4746.93	3928.29	3866.62	4881.8	3663.21	5809.97
MW0052777	Euphohelioscopin A	C30H42O6	516.3322	498.2981	0.6429	2.2137	87064-61-7	--	--	--	129008900	Lipids and lipid-like molecules	Prenol lipids	14745.31	4743.67	27798.32	6282.07	1534.55	9046.86	4716.68	4254.01	6297.02	21056.89	6598.02	4628.95
MW0103809	(+)-Diethyl L-tartrate	C8H14O6	248.1133	206.079	0.7046	5.5156	87-91-2	HMDB0033584	--	--	6993580	Organic acids and derivatives	Hydroxy acids and derivatives	4717.94	3476.57	2713.46	5265.52	5430.75	3068.47	3233.65	4143.49	1785.36	4253.61	3857.49	4517.9
MW0008565	N,N-Dibutyl-N'-(3-chloro-2-methylphenyl)urea	C16H25ClN2O	431.1675	296.1655	0.9674	4.2841	86781-36-4	--	--	--	17381642	Benzenoids	Benzene and substituted derivatives	12863.73	21080.35	20726.39	16004.04	15202.81	23471.44	4659.67	5030.25	4721.47	3332.33	6732.64	6017.24
MW0120344	4-Chloro-2-methyl-6-trifluoromethylquinoline	C11H7ClF3N	287.0557	245.0219	0.6495	4.0037	867167-05-3	--	--	--	17039878	Organoheterocyclic compounds	Quinolines and derivatives	43.85	745.29	574.38	5173.97	5711.01	757.95	1461.51	528.05	119.06	1696.64	445.91	931.44
MW0055252	Nbd-ceramide	C30H49N5O6	576.3749	575.3683	0.6142	7.7058	86701-10-2	--	--	63013	16219783	Lipids and lipid-like molecules	Sphingolipids	1758.22	1755.75	2109.73	1091.97	1444.06	2006.22	1811.54	2082.95	2053.08	2877.62	4054.65	3020.02
MW0123756	Dorsomorphin	C24H25N5O	422.2016	399.2059	0.7444	4.7019	866405-64-3	--	--	--	11524144	Organoheterocyclic compounds	Pyrazolopyrimidines	455.17	625.91	336.44	1531.36	1245.48	667.76	2837.8	2488.82	1807.13	1756.11	3833.17	3086.79
MW0000105	7-Ethyl-10-hydroxycamptothecin	C22H20N2O5	415.1262	392.1372	0.63	3.8477	86639-52-3	HMDB0060510	C11173	--	104842	Alkaloids and derivatives	Camptothecins	1750.69	2528.56	2274.5	2892.93	2737.88	2024.78	661.71	679.76	221.37	234.19	393.57	63.5
ZINC49889257	3,4,5-Tricaffeoylquinic acid	C34H30O15	701.5916	678.5989999999999	0.5138	11.0665	86632-03-3	-	-	--	6440783	Organic oxygen compounds	Organooxygen compounds	7608.86	2716.09	6723.87	4601.97	6994.1	6941.72	8499.24	3452.25	5140.11	6804.97	3759.91	4895.59
MW0151980	JWH203-3 Chrophenyl isomer	C21H22ClNO	340.1431	339.139	0.7136	2.7721	864445-56-7	--	--	85085	44397713	Organoheterocyclic compounds	Indoles and derivatives	70128.59	77588.24	61846.02	122396.63	113112.8	73234.88	184369.73	156353.85	166702.14	106673.2	206140.5	180878.08
MW0123876	Ethanone, 2-(2-chlorophenyl)-1-(1-pentyl-1H-indol-3-yl)-	C21H22ClNO	340.1418	339.139	0.9995	7.2056	864445-54-5	--	--	64902	44397500	Organoheterocyclic compounds	Indoles and derivatives	42639.34	32611.04	37236.09	48085.55	35899.34	33546.42	42417.34	46046.73	41689.03	48474.48	48534.35	45190.48
MW0125732	N-Desmethyldiltiazem	C21H24N2O4S	401.1522	400.1457	0.6554	4.5816	86408-45-9	--	--	--	107891	Organoheterocyclic compounds	Benzothiazepines	5106.51	5743.6	5467.67	5522.65	6764.69	5053.05	8468.59	8468.08	2973.45	3777.77	10112.71	7311.11
MW0012936	1-Oleoyl-2-acetyl-sn-glycerol	C23H42O5	399.3081	398.3032	0.7935	11.4265	86390-77-4	--	--	424	6437055	Lipids and lipid-like molecules	Glycerolipids	28522.98	42597.57	29820.08	37282.08	60935.91	13516.89	26469.47	38218.88	77678.28	44552.67	23052.81	21722.31
MW0123707	Dimethylenastron	C16H18N2O2S	622.2511	302.1089	0.618	4.9238	863774-58-7	--	--	--	11609157	Organoheterocyclic compounds	Diazanaphthalenes	25139.29	6873.8	10954.19	19936.55	5936.67	10167.99	2583.27	3784.23	3287.45	2848.2	3099.41	3499.55
MW0123248	Cebranopadol	C24H27FN2O	420.2438	378.2107	0.596	8.6287	863513-91-1	--	--	--	--	--	--	34816.85	40243.61	55197.59	24084.28	29319.79	38111.32	19500.58	22245.36	20028.0	21785.16	26404.02	19821.53
MW0120428	4-Desmethoxy-4-chloroomeprazole	C16H16ClN3O2S	372.0512	349.0652	0.6481	7.4117	863029-89-4	--	--	--	20695566	Organoheterocyclic compounds	Benzimidazoles	3754.66	5131.25	3684.98	5181.84	3424.42	4238.74	2155.03	2432.99	2280.21	1974.53	1188.31	270.1
MW0054757	Menatetrenone	C31H40O2	445.3022	444.3028	0.5398	3.3854	863-61-6	HMDB0030017	D00100	--	5282367	Lipids and lipid-like molecules	Prenol lipids	1940.73	1016.62	1720.9	1680.0	1321.38	1654.15	763.77	953.93	267.27	1111.56	892.95	795.81
MW0012818	1-Hexadecyl-2-(5Z,8Z,11Z,14Z-eicosatetraenoyl)-sn-glycero-3-phosphocholine	C44H82NO7P	790.5881	767.5829	0.5265	10.565999999999999	86288-11-1	--	--	43414	14389476	Lipids and lipid-like molecules	Glycerophospholipids	126209.96	127387.08	127760.05	119683.73	147737.83	118381.2	150513.84	150027.42	150683.26	196527.57	128464.01	128011.66
MW0118901	2-Thiophenecarbonitrile, 5-(5,6-dimethoxy-1H-benzimidazol-1-yl)-3-[[2-(methylsulfonyl)phenyl]methoxy]-	C22H19N3O5S2	487.1103	469.0766	0.6334	10.6668	862812-98-4	--	--	45319	11626927	Organoheterocyclic compounds	Benzimidazoles	1.21	2.22	0.64	2.02	65.2	0.95	2.42	1.99	27.69	2.67	2.59	1.76
MW0119865	4-(3,4-Dichlorophenyl)-2-hydrazinyl-6-(trifluoromethyl)pyrimidine	C11H7Cl2F3N4	360.9553	322.0	0.6842	0.6439	862658-93-3	--	--	--	7018677	Organoheterocyclic compounds	Diazines	21560.23	29150.34	28595.55	18344.0	21159.89	28855.41	7823.77	2861.96	8193.19	11129.76	6805.64	8443.44
MW0119978	4-(Difluoromethyl)-2-hydrazinyl-6-(3-methoxyphenyl)pyrimidine	C12H12F2N4O	333.0511	266.0979	0.6387	1.2416	861226-63-3	--	--	--	7018706	Organoheterocyclic compounds	Diazines	8421.24	6613.47	9179.87	10767.88	7371.91	8183.86	10427.79	8684.6	9127.85	7782.72	8792.2	9010.42
MEDL02687	Feruloylcholine	C15H22NO4+	344.1544	280.1384	0.6324	4.2404	85927-25-9	HMDB0032800	-	--	131751314	Alkaloids	Alkaloids	3057.27	2676.24	2800.57	589.95	352.9	2005.7	3510.26	3204.72	3744.23	2903.68	3853.18	3494.95
MW0010059	Vialinin A	C34H26O8	585.1515	562.1628	0.619	1.8853	858134-23-3	--	--	45274	11563133	Benzenoids	Benzene and substituted derivatives	6676.1	6178.35	7806.1	6733.84	5595.82	4980.02	5155.4	5098.15	4927.96	6033.92	5603.6	4875.79
MW0006996	Esprocarb	C15H23NOS	266.1598	265.15	0.7145	0.7043	85785-20-2	--	C14526	--	91740	Benzenoids	Benzene and substituted derivatives	31110.6	138764.3	123806.51	40808.06	139077.63	131283.58	67517.71	84552.31	77359.0	66906.92	69465.47	68372.95
MW0126688	Tert-butyl 4-((3-(pyridin-4-yl)-1,2,4-oxadiazol-5-yl)methoxy)piperidine-1-carboxylate	C18H24N4O4	721.3656	360.1798	0.8457	4.8209	857652-30-3	--	--	64655	11462546	Organoheterocyclic compounds	Piperidines	17062.36	16332.4	16737.85	17280.43	15361.94	16591.06	18302.83	18367.61	17643.3	17057.42	18839.86	15461.67
MW0123340	Ciprofloxacin	C17H18FN3O3	354.1222	331.1332	0.627	2.7169	85721-33-1	HMDB0014677	C05349	--	2764	--	--	9530.87	9835.87	7440.93	17170.27	16236.66	8380.21	25372.55	21628.34	23926.62	14502.77	28891.89	26480.23
MW0115727	(-)-Blebbistatin	C18H16N2O2	293.1361	292.1212	0.5119	6.4026	856925-71-8	--	--	45431	5287792	Organoheterocyclic compounds	Quinolines and derivatives	5558.2	9765.44	7698.83	2819.96	11140.41	13524.1	1563.64	2474.65	1501.22	2620.65	3218.9	2514.18
MW0126632	Tedizolid	C17H15FN6O3	409.0825	370.119	0.6261	0.6725	856866-72-3	--	--	--	11653580	Organoheterocyclic compounds	Pyridines and derivatives	12015.18	47039.65	10085.52	38459.17	26897.09	32224.71	77301.46	72684.47	71169.95	68774.31	63355.25	76219.47
MW0112949	4-(4-Chloro-3-nitrophenyl)-3-methyl-4-oxobutanoic acid	C11H10ClNO5	254.0239	271.0248	0.5831	3.5061	85633-96-1	--	--	--	2874446	Organic oxygen compounds	Organooxygen compounds	1871.28	2297.22	1867.63	1721.22	1826.35	2233.93	1832.39	1926.78	1885.98	2312.56	1794.49	1462.69
MW0108247	Methyl {[(4-methoxyphenyl)sulfonyl]amino}acetate	C10H13NO5S	298.015	259.0514	0.6223	2.3601	85622-73-7	--	--	--	743488	Organic acids and derivatives	Carboxylic acids and derivatives	1077.27	1228.08	594.47	1219.5	1511.66	1369.74	1169.04	1810.06	488.92	1608.01	1603.19	1135.75
MW0110602	1,4-Cyclohexadiene-1-ethanamine, N,α-dimethyl-	C10H17N	320.3065	151.1361	0.6201	5.7537	855312-71-9	--	--	--	57487843	Organic nitrogen compounds	Organonitrogen compounds	5681.2	3969.88	4760.29	5032.39	7743.69	5940.38	6032.01	5534.59	7155.09	6465.88	7193.16	7320.07
MW0145173	Antibiotic OA-6129D	C20H33N3O8S	476.2042	475.1988	0.6907	4.3149	85414-25-1	--	C17375	--	134990	--	--	12701.84	869.16	643.59	8989.45	621.74	1736.63	1955.28	172.25	200.7	113.97	2165.0	2245.57
MW0004148	3-Nitro-N-(2-pyridinyl)benzamide	C12H9N3O3	504.1627	243.0644	0.6477	0.5538	85367-01-7	--	--	--	676057	Benzenoids	Benzene and substituted derivatives	2369.46	2009.15	2108.29	2453.12	2010.17	1851.94	2408.15	943.3	1328.14	1538.92	716.98	1737.51
MW0110669	2,2',2''-(1-Oxa-4,7,10-triazacyclododecane-4,7,10-triyl)triethanol	C14H31N3O4	611.4702	305.2315	0.6471	11.1401	85325-51-5	--	--	--	649206	Organic nitrogen compounds	Organonitrogen compounds	4159.02	1339.87	5796.81	849.83	3019.69	9006.94	3250.16	1678.83	1670.73	8739.0	5943.17	8363.87
MW0147304	Cefpimizole sodium	C28H25N6O10S2.Na	715.0972	692.0971	0.6009	0.6284	85287-61-2	HMDB0041851	C13024	--	443996	Organic acids and derivatives	Carboxylic acids and derivatives	2779.78	2668.53	4319.7	3438.21	1631.63	5876.91	929.53	1664.02	1378.79	2089.91	2161.44	1257.86
MW0107120	Glycine, N,N'-[1,2-ethanediylbis(oxy-2,1-phenylene)]bis[N-(carboxymethyl)-	C22H24N2O10	953.2934	476.1431	0.6462	4.2332	85233-19-8	--	--	--	104751	Organic acids and derivatives	Carboxylic acids and derivatives	2252.54	1149.11	2542.87	2100.86	504.34	3404.5	108.08	896.67	934.62	80.72	1029.24	865.15
MW0127378	6,6'-Thiobis(4-chloro-2-nitrophenol)	C12H6Cl2N2O6S	774.8521	375.9324	0.5739	0.6890000000000001	852-20-0	--	--	--	70063	Organosulfur compounds	Thioethers	4112.14	7441.11	8154.41	5613.87	2535.72	8731.06	2374.31	5117.67	283.33	488.53	46.11	1932.63
MW0015859	Arachidonoyl amine	C20H33NO	370.2091	303.2562	0.6174	3.8975	85146-53-8	--	--	36680	5283393	Lipids and lipid-like molecules	Fatty Acyls	2065.83	2952.84	2763.57	2667.72	3404.81	3532.9	3318.12	2733.52	2735.44	3133.92	3167.68	3214.72
MW0004275	4-(3-Bromo-4-methylbenzenesulfonyl)morpholine	C11H14BrNO3S	676.9415	318.9878	0.53	0.6588	850429-74-2	--	--	--	7213309	Benzenoids	Benzene and substituted derivatives	1799.02	2737.98	2780.64	3061.07	4614.51	2442.06	1469.76	1702.86	1741.53	959.57	1224.78	593.7
MW0006306	Benzyl butyl phthalate	C19H20O4	642.3122	312.1362	0.5431	3.2595	85-68-7	--	C14211	44515	2347	Benzenoids	Benzene and substituted derivatives	7019.01	49700.64	43431.39	65619.49	95764.63	49941.74	3323.49	2731.57	3819.81	3415.43	3995.04	2598.14
ZINC8100883	Phthalic Anhydride	C8H4O3	190.1518	148.11700000000002	0.5706	4.2849	85-44-9	-	-	--	6811	Organoheterocyclic compounds	Benzofurans	55623.14	75494.72	67414.2	63237.42	78029.95	68764.08	96989.35	90899.03	95554.66	93013.8	108861.19	94056.05
MW0144247	Acetrizoic acid	C9H6I3NO3	574.7839	556.7482	0.5539	3.3332	85-36-9	--	C14164	--	6806	Benzenoids	Benzene and substituted derivatives	4259.47	509.1	236.14	4664.5	287.68	535.44	7134.76	5778.7	6601.61	5383.81	10133.39	5011.67
MEDN1545	Guanosine-5'-monophosphate	C10H14N5O8P	364.0655	363.05800000000005	0.8426	1.1543	85-32-5	HMDB0001397	C00144	--	135398631	Nucleotide And Its metabolomics	Nucleotide and Its metabolomics	203994.46	216650.59	211247.35	326133.25	289885.99	225621.71	404808.72	380852.83	386586.03	300661.18	481499.89	424816.24
MW0157231	Streptidine	C8H18N6O4	542.3117	262.139	0.639	7.684	85-17-6	--	C00837	--	439323	Organic oxygen compounds	Organooxygen compounds	13547.21	17827.93	3279.66	14545.27	11053.63	8443.44	15156.41	16333.01	18088.01	15866.69	20511.41	16347.37
ZINC967819	Phenanthrene	C14H10	217.195	178.234	0.75	6.9545	85-01-8	-	C11422	--	995	Benzenoids	Phenanthrenes and derivatives	5171.7	4481.94	4002.18	5727.57	4683.54	3946.47	4700.09	5620.32	4955.39	5396.04	6304.01	5389.05
MW0123269	Cefpirome	C22H22N6O5S2	578.1255	514.1093	0.6271	13.9772	84957-29-9	HMDB0041852	C11199	--	5479539	Organoheterocyclic compounds	Lactams	2664.55	763.88	2407.29	2472.63	2930.42	3350.31	1695.91	2798.27	435.75	2664.63	2816.82	2724.14
MW0127298	3-[(2-Methylbenzyl)sulfanyl]-1H-1,2,4-triazol-5-ylamine	C10H12N4S	458.1903	220.0783	0.642	6.4919	849524-40-9	--	--	--	4317248	Organosulfur compounds	Thioethers	2442.85	3128.99	2624.18	2844.87	2919.07	2709.88	2492.64	2898.32	2502.92	2752.23	1352.6	2953.74
MW0116216	[6-Chloro-9-[(4-methoxy-3,5-dimethyl-2-pyridyl)methyl]purin-2-yl]amine	C14H15ClN6O	301.0963	318.0996	0.6499	5.0854	848695-25-0	--	--	--	16736529	Organoheterocyclic compounds	Imidazopyrimidines	3348.03	3308.16	4214.73	3096.07	4200.89	2699.92	3021.93	2792.8	4598.04	1774.51	3590.26	3038.75
MW0013025	2-(14,15-Epoxyeicosatrienoyl)glycerol	C23H38O5	377.2663	394.2719	0.7082	10.5756	848667-56-1	HMDB0013651	--	44863	53481916	Lipids and lipid-like molecules	Glycerolipids	1854.28	1646.73	669.05	3641.08	2266.36	364.28	539.82	637.65	7.52	391.95	287.98	271.47
MW0124711	Lormetazepam	C16H12Cl2N2O2	398.0433	334.0276	0.643	2.9115	848-75-9	HMDB0041919	D01657	--	13314	Organoheterocyclic compounds	Benzodiazepines	9341.62	6465.5	8395.66	8281.01	5914.22	7774.62	2094.92	2540.11	2667.93	1608.07	2467.85	1672.46
MEDN1159	FFA(15:1)	C15H28O2	205.195	240.2089	0.6494	12.2744	84743-29-3	-	-	--	--	FA	FFA	142542.42	493917.58	322998.47	113318.39	138245.27	147111.32	100962.99	164220.08	144826.59	220348.18	241348.77	227328.78
MW0154088	N-(Cyclohexylmethyl)cyclohexanamine	C13H25N	196.2061	195.1987	0.6428	11.4136	84681-77-6	--	--	--	1531417	Organic nitrogen compounds	Organonitrogen compounds	4816.46	10489.59	3964.58	5337.77	3615.24	4495.98	4962.01	5282.14	1512.72	2377.27	2895.37	2731.07
MEDP1625	Androstanedione	C19H28O2	336.2255	288.2089	0.991	7.6032	846-46-8	HMDB0000899	C00674	--	222865	Hormones and hormone related compunds	Hormones and hormone related compunds	7319.09	21357.98	12370.37	42415.61	43072.23	15526.18	2690.72	2663.77	12555.19	19385.29	4726.01	2688.95
MW0149233	Flumipropyn;S-23121	C18H15ClFNO3	365.1062	347.0724	0.6395	3.029	84478-52-4	--	C10993	--	158434	Organoheterocyclic compounds	Pyrrolines	11369.08	16774.55	17018.55	18815.87	22526.99	22625.32	9387.32	8723.06	2609.56	8054.51	6224.71	6632.86
MW0118196	2-Amino-1-(3-methoxyphenyl)-1H-pyrrolo[2,3-b]quinoxaline-3-carboxamide	C18H15N5O2	400.0759	333.1226	0.6468	0.6589	844460-37-3	--	--	--	938979	Organoheterocyclic compounds	Pyrroles	2811.25	2436.61	2141.26	2132.05	3313.89	2084.55	2184.46	2480.25	2517.96	2419.65	2410.55	882.17
MW0055067	Mifepristone	C29H35NO2	430.277	429.2668	0.6984	1.345	84371-65-3	HMDB0014972	C07652	1303	55245	Lipids and lipid-like molecules	Steroids and steroid derivatives	4301.85	2882.55	7036.68	2700.77	2377.6	4024.31	2999.97	2389.24	3341.04	4458.91	2728.29	2361.72
MW0133278	4-(3,7-dimethylocta-2,6-dien-1-yl)-5-(6-hydroxy-1-benzofuran-2-yl)benzene-1,3-diol	C24H26O4	774.4007	378.1831	0.6255	5.9463	84323-14-8	HMDB0030071	C08732	--	5281297	Phenylpropanoids and polyketides	2-arylbenzofuran flavonoids	1647.82	1741.04	1808.17	2043.65	1984.45	1538.93	2006.66	2360.62	1006.4	2338.68	2846.1	1743.89
MW0120654	4'-O-β-D-Glucosyl-5-O-methylvisamminol	C22H28O10	475.1569	452.1682	0.9865	6.8198	84272-85-5	--	--	--	21670038	Organoheterocyclic compounds	Benzopyrans	10298.41	9388.99	10706.31	10511.75	9831.4	10444.48	13469.75	14552.63	13558.77	15177.09	14437.68	16118.71
MW0009775	Sudan I	C16H12N2O	312.1104	248.095	0.6201	6.5572	842-07-9	--	C19525	--	13297	Benzenoids	Naphthalenes	23467.57	23485.65	20344.13	25130.53	24446.31	23302.0	36783.58	26929.96	25093.45	24056.12	27756.57	27207.83
MW0001955	2-(4-Morpholinyl)ethyl 2,4-dihydroxybenzoate	C13H17NO5	557.2107	267.1107	0.6475	0.8798	84139-72-0	--	--	--	824673	Benzenoids	Benzene and substituted derivatives	5288.67	5908.64	6643.11	4299.05	4385.54	5634.18	3257.19	2848.28	3634.28	1935.26	2190.53	2557.41
MW0009283	Ostarine	C19H14F3N3O3	503.9738	389.0987	0.6458	0.5531	841205-47-8	--	D10221	--	11326715	Benzenoids	Benzene and substituted derivatives	1498.66	351.47	1633.81	1374.77	882.93	1322.15	1054.53	196.09	381.38	829.8	1256.77	805.49
MW0125003	Methoprotryne	C11H21N5OS	294.1381	271.1467	0.7305	6.5682	841-06-5	--	C19104	--	13290	Organoheterocyclic compounds	Triazines	1709.21	2122.06	1791.65	1515.57	1653.09	1861.84	1997.47	1761.17	2194.77	1714.55	2447.62	2084.26
MW0108326	Mevinic acid	C23H36O6	450.2846	408.2512	0.6192	4.3449	84064-38-0	--	--	--	23899997	Organic acids and derivatives	Hydroxy acids and derivatives	1023.47	145.99	77.67	2402.46	840.08	21.45	1878.64	1947.55	1665.3	787.6	2363.26	2485.29
MW0106675	Ethyl N-acetyl-L-tyrosinate	C13H17NO4	541.195	251.1158	0.6407	2.6460000000000004	840-97-1	HMDB0000866	C01657	--	13289	Organic acids and derivatives	Carboxylic acids and derivatives	1125.02	1622.46	1475.34	2135.38	2810.79	2052.98	543.19	473.25	31.76	553.55	798.69	326.09
MW0110033	Trimeprazine	C18H22N2S	316.1834	298.1504	0.5799	5.7404	84-96-8	HMDB0015376	C07172	2942	5574	Organoheterocyclic compounds	Benzothiazines	2461.23	2606.31	3114.33	3109.14	4570.66	2922.25	3595.14	3529.11	2659.06	3823.56	4530.72	4308.87
MEDL01942	Dibutyl phthalate	C16H22O4	279.158	278.1518	0.7991	6.317	84-74-2	HMDB0033244	C14214	--	3026	Phenolic acids	Phenolic acids	84152.05	87085.1	82506.08	89269.33	85308.57	187525.17	93131.18	245505.85	97041.43	188283.81	130567.94	101455.46
MEDL01994	Diisobutyl phthalate	C16H22O4	355.0703	278.1518	0.557	11.799000000000001	84-69-5	HMDB0013835	C15205	--	6782	Phenolic acids	Phenolic acids	2201719.43	2741197.77	1910463.46	2646111.6	2619821.26	2695116.71	1987936.32	1989197.49	1864027.69	2426334.34	3140582.3	1954412.18
MW0002393	2,6-Dihydroxyanthraquinone	C14H8O4	287.0554	240.0423	0.6278	3.6733	84-60-6	--	C14267	--	6776	Benzenoids	Anthracenes	5343.8	6918.71	7407.95	8638.72	11793.27	8319.91	1459.52	2915.09	732.73	2596.29	2228.98	1892.15
MW0103362	3'-Adenylic acid	C10H14N5O7P	350.0755	347.0631	0.9968	1.1521	84-21-9	HMDB0003540	C01367	--	41211	Nucleosides, nucleotides, and analogues	Ribonucleoside 3'-phosphates	88421.02	102863.76	92156.4	132745.45	119812.85	100076.23	142610.72	141017.29	164553.78	155378.24	151400.34	152772.35
MW0137951	Dienestrol diacetate	C22H22O4	389.1119	350.1518	0.7741	9.631	84-19-5	--	--	--	5805243	Phenylpropanoids and polyketides	Stilbenes	110.0	129.84	104.71	101.01	63.7	88.3	74.27	129.98	117.66	139.45	147.82	83.56
MW0055405	N-Palmitoyltaurine	C18H37NO4S	349.2222	363.2443	0.6081	5.3822	83982-06-3	--	--	44910	14504290	Lipids and lipid-like molecules	Fatty Acyls	2330.73	1839.92	4799.72	496.54	1431.06	2169.06	1691.02	1623.56	1812.54	1802.8	1924.61	1950.82
MW0118288	2-Amino-N-cyclopentyl-1-(3-methoxypropyl)-1H-pyrrolo[2,3-b]quinoxaline-3-carboxamide	C20H25N5O2	434.1538	367.2008	0.6266	3.7786	839699-72-8	--	--	45193	1882365	Organoheterocyclic compounds	Diazanaphthalenes	1064.58	1130.04	1082.79	939.9	1219.65	581.16	756.15	734.09	146.72	629.42	336.05	712.16
MW0006519	Cetirizine	C21H25ClN2O3	389.1639	388.1554	0.5439	7.574	83881-51-0	HMDB0005032	C07778	--	2678	Benzenoids	Benzene and substituted derivatives	16624.96	28795.9	30326.47	20293.65	29394.13	26248.65	15585.27	16384.64	16251.46	16460.28	18040.25	18199.64
MEDL00917	LPE(0:0/20:4)	C28H50NO7P	526.3307	543.3325	0.5638	5.6353	83799-24-0	HMDB0011487	-	--	--	GP	LPE	1647.09	3343.93	1587.64	4199.9	5737.22	2239.62	2245.24	3267.94	2851.55	5242.82	3488.38	2810.6
MW0149283	Fosmethilan	C13H19ClNO3PS2	385.0638	367.0232	0.5852	7.7791	83733-82-8	--	C18989	--	55138	Benzenoids	Benzene and substituted derivatives	2427.71	2289.56	3678.65	1283.41	1919.25	2646.43	562.18	713.74	496.4	1182.25	1568.56	1276.63
MW0009214	N-Trityl-L-homoserine	C23H23NO3	425.1833	361.1678	0.63	0.6284	83427-79-6	--	--	--	13943565	Benzenoids	Triphenyl compounds	4071.11	4298.51	2147.12	1357.59	2574.68	1150.5	3058.13	3960.48	2870.33	2910.9	2090.87	3463.76
MW0118802	2-Oxoticlopidine	C14H14ClNOS	297.0824	279.0485	0.649	13.2134	83427-51-4	HMDB0013923	--	--	134227	Organoheterocyclic compounds	Piperidines	218861.27	252907.23	148037.16	129094.98	92653.09	123033.43	140888.1	189313.81	170627.46	124567.88	89624.21	262180.76
MW0122824	Ametryn	C9H17N5S	266.0845	227.1205	0.7177	8.0719	834-12-8	--	C18700	--	13263	Organoheterocyclic compounds	Triazines	1343.71	1177.12	677.2	1529.69	726.87	986.88	1801.66	1369.49	302.77	1446.39	1363.57	1189.78
MW0001449	1-[2-(4-Fluorophenoxy)phenyl]-N-methylmethanamine	C14H14FNO	480.2456	231.1059	0.6388	3.2111	833482-53-4	--	--	--	10421413	Benzenoids	Benzene and substituted derivatives	1949.22	2526.28	3400.24	982.99	2449.37	2443.04	233.24	179.05	89.84	264.96	324.77	275.39
MW0116512	1-(Methylsulfonyl)-3-piperidinecarbohydrazide	C7H15N3O3S	481.1298	221.0834	0.6326	0.7040000000000001	832741-28-3	--	--	--	4045908	Organoheterocyclic compounds	Piperidines	7997.34	5470.86	4787.19	8174.72	8877.15	6066.86	13445.06	11821.12	8095.67	12935.27	20252.73	13729.41
MW0150710	HC Toxin	C21H32N4O6	459.225	436.2322	0.6755	8.0723	83209-65-8	--	--	64768	107864	Organic acids and derivatives	Carboxylic acids and derivatives	4517.03	7199.42	10186.52	4717.53	6962.05	6274.58	5188.78	4674.69	1248.56	4713.11	4864.85	3374.94
MW0141787	1-Methylphenanthrene	C15H12	402.2225	192.0939	0.5877	3.2511	832-69-9	--	C19457	--	13257	Benzenoids	Phenanthrenes and derivatives	5508.74	6890.84	11467.26	7350.38	7929.43	5933.94	6594.92	6965.93	6101.65	8023.39	8780.59	7332.75
MW0006829	Diflufenican	C19H11F5N2O2	395.0844	394.0741	0.6252	3.3188	83164-33-4	--	C18549	72354	91735	Benzenoids	Benzene and substituted derivatives	8194.98	9351.48	12612.1	8030.96	9772.57	7802.29	6805.56	6838.82	6180.95	6898.08	8184.99	6196.77
MW0120095	4,6-Dimethyl-2-{[3-(morpholin-4-yl)propyl]amino}pyridine-3-carbonitrile	C15H22N4O	330.1694	274.1794	0.7279	5.6342	831183-48-3	--	--	--	2013066	Organoheterocyclic compounds	Pyridines and derivatives	1483.39	1428.15	1524.51	2075.38	2341.69	1723.68	1486.67	1557.1	1368.58	1862.55	1896.98	1657.8
MW0157300	Sultamicillin tosilate;Sultamicillin tosylate	C25H30N4O9S2.C7H8O3S	784.2025	766.1648	0.5103	0.6134	83105-70-8	--	C13129	--	444021	Organoheterocyclic compounds	Lactams	5442.33	3852.27	2196.94	5606.48	3699.32	3380.91	5920.58	3841.1	4329.36	3647.06	6204.08	3191.84
MEDL02383	Ethyl gallate	C9H10O5	181.0495	198.0528	0.6499	13.0856	831-61-8	HMDB0033836	-	--	13250	Tannins	Tannin	4865.05	359.99	2310.62	1918.64	1580.43	1686.7	1710.38	2281.25	1189.56	1850.51	2754.55	1901.05
MW0006134	Bensulfuron-methyl	C16H18N4O7S	859.1419999999999	410.0896	0.6352	0.6587	83055-99-6	--	C10937	--	54960	Benzenoids	Benzene and substituted derivatives	2098.57	2012.91	618.85	3479.62	2490.89	1919.13	1612.64	2026.31	1634.97	155.85	1617.69	529.92
MW0054320	Leukotriene B4 dimethylamide	C22H37NO3	328.2635	363.2773	0.5784	9.9861	83024-92-4	HMDB0005085	--	36242	5283126	Lipids and lipid-like molecules	Fatty Acyls	12560.19	14653.42	12199.2	12824.8	13232.15	10893.6	13780.73	15075.54	15125.12	13238.85	13395.43	15006.66
MW0005346	5-(1,1-Dimethylheptyl)-2-[5-hydroxy-2-(3-hydroxypropyl)cyclohexyl]phenol	C24H40O3	377.3245	376.2977	0.7069	10.3107	83002-04-4	--	--	62954	4412255	Benzenoids	Benzene and substituted derivatives	6672.16	8326.43	6815.21	11138.61	10908.73	23481.76	7126.53	10781.17	11002.96	9025.33	29247.24	9806.03
MEDN0261	3-Indolepropionic Acid	C11H11NO2	190.08599999999998	189.079	0.5131	3.6626	830-96-6	HMDB0002302	-	--	3744	Heterocyclic compounds	Indole and Its derivatives	4192.94	2150.74	1677.86	3928.94	3735.96	1752.95	2009.63	1061.4	1772.5	1498.05	1638.49	1780.74
MEDP0250	Riboflavin	C17H20N4O6	377.1455	376.1383	0.8868	3.0676	83-88-5	HMDB0000244	C00255	--	493570	CoEnzyme and vitamins	CoEnzyme and vitamins	28813.98	21325.91	18204.76	35545.36	19997.76	19418.91	8077.52	7466.04	6833.48	8079.37	9280.89	8948.78
MW0148401	Diacetylaminoazotoluene;Pellidole;Periphermine	C18H19N3O2	348.111	309.1477	0.6432	4.1079	83-63-6	--	C17380	--	6751	Organoheterocyclic compounds	Azobenzenes	1769.78	2382.14	1883.08	2520.04	2679.38	2208.98	3392.3	2163.71	2829.97	3768.82	3834.71	3528.11
MEDP1158	Deoxycholic acid	C24H40O4	394.3046	392.2927	0.9543	7.1616	83-44-3	HMDB0000626	C04483	--	222528	Bile acids	Bile acids	6667.61	11011.58	12315.23	8358.04	21245.93	11165.94	9296.26	9220.55	4056.34	9028.29	10355.3	8556.11
MW0169474	Methylprednisolone; LC-ESI-ITFT; MS2; CE	C22H30O5	397.19699999999995	374.2093	0.6555	5.6646	83-43-2	--	D00407	--	--	--	--	5288.58	5413.03	5377.54	5463.14	5604.42	5847.22	6578.8	6998.6	5297.9	7246.33	9756.58	6065.88
MW0001622	1-Indanone	C9H8O	133.0645	132.0575	0.7197	13.984000000000002	83-33-0	HMDB0059602	C01504	--	6735	Benzenoids	Indanes	257.95	5498.31	685.46	2352.19	4576.67	3491.97	5435.32	2140.43	2379.43	4445.88	3453.82	2700.06
MW0122831	Aminoantipyrine	C11H13N3O	250.1187	203.1059	0.6497	13.3273	83-07-8	--	--	24054	2151	Organoheterocyclic compounds	Azoles	1997.3	4177.55	2023.92	1843.55	1932.37	2154.79	2902.41	3629.48	2105.14	7428.58	3298.62	3000.52
MW0157949	Tolrestat	C16H14F3NO3S	737.1184	357.0646	0.6442	1.2127	82964-04-3	--	C01621	--	53359	Benzenoids	Naphthalenes	5202.59	5562.43	4869.09	4483.42	5179.23	5966.83	6671.39	4262.2	4896.83	6113.44	3274.43	3769.23
MEDP1156	DG(10:0/10:0/0:0)	C23H44O5	383.3132	400.3189	0.5069	9.631	82950-64-9	-	-	--	162916	GL	DG	4063.32	3955.19	3032.65	3856.74	3682.9	3430.23	3014.16	3401.28	3470.19	3728.23	4206.23	4356.72
MW0104315	2-(2-Butoxyethoxy)acetic acid	C8H16O4	141.0907	176.1049	0.6324	12.7824	82941-26-2	--	--	--	106312	Organic acids and derivatives	Carboxylic acids and derivatives	1680.21	1781.53	3011.45	3310.31	1499.39	1636.51	1047.69	1533.29	172.6	2137.28	2743.25	1288.27
MW0012351	13-Tetradecynoic acid	C14H24O2	359.1764	224.1776	0.7274	5.8879	82909-47-5	--	--	--	5312715	Lipids and lipid-like molecules	Fatty Acyls	8614.1	8672.66	9718.34	9579.23	9956.65	9060.31	11044.12	11535.72	10252.27	11074.83	12242.92	11080.51
MW0114383	Echinacoside	C35H46O20	833.2748	786.2582	0.7695	0.6503	82854-37-3	--	C10450	68333	5281771	Organic oxygen compounds	Organooxygen compounds	2143.91	775.08	1862.04	2948.82	1421.2	469.93	4457.25	4153.28	7847.51	6054.03	7198.42	6747.59
MW0138008	DL-3-Phenyllactic acid	C9H10O3	149.0591	166.063	0.6940000000000001	1.8952	828-01-3	HMDB0000748	--	--	3848	Phenylpropanoids and polyketides	Phenylpropanoic acids	20455.49	24627.35	27577.94	28813.95	35284.23	24748.28	12368.89	12015.26	11186.76	13120.01	13027.29	11371.03
MW0012964	1-Palmitoyl-2-lauroyl-sn-glycero-3-phosphorylcholine	C36H72NO8P	716.4614	677.4996	0.5908	6.2507	82765-47-7	--	--	--	10676014	Lipids and lipid-like molecules	Glycerophospholipids	68.83	1285.12	1369.0	80.87	1789.52	704.21	149.28	210.63	220.55	268.35	164.38	284.0
MW0000753	(5-Chloro-4-formyl-2-methoxyphenoxy)acetic acid	C10H9ClO5	489.0549	244.0139	0.9908	0.2773	827592-22-3	--	--	--	19575264	Benzenoids	Benzene and substituted derivatives	16963.78	11768.35	8304.62	4178.11	13211.95	9264.15	11298.0	9202.64	11494.58	11450.05	10616.32	10539.83
MW0106212	Cyclo(phenylalanyltryptophyl)	C20H19N3O2	356.13699999999994	333.1477	0.8991	7.2175	82597-82-8	--	--	--	158183	Organic acids and derivatives	Carboxylic acids and derivatives	5447.83	4328.13	4781.45	7414.98	5735.43	4848.54	5811.32	7392.51	6958.71	7337.27	6519.59	6737.79
MW0007440	Isoxaben	C18H24N2O4	687.3378	332.1736	0.5939	3.7658	82558-50-7	--	C18504	72310	73672	Benzenoids	Benzene and substituted derivatives	2629.37	1762.69	10678.64	195.47	40.84	1465.68	21443.52	17994.66	24760.52	20257.61	24953.05	26125.76
MW0155685	Precorrin 2;Dihydrosirohydrochlorin	C42H48N4O16	882.3407	864.3065	0.6394	7.7719	82542-92-5	--	C02463	--	5280516	Organoheterocyclic compounds	Tetrapyrroles and derivatives	1431.79	673.04	844.37	1077.86	743.73	2307.72	1476.54	1493.57	1139.75	534.2	1743.23	762.35
MW0134614	5-Methyl-7-methoxyisoflavone	C17H14O3	533.1927	266.0943	0.5943	4.0158	82517-12-2	--	--	84979	2734290	Phenylpropanoids and polyketides	Isoflavonoids	4031671.69	2161461.86	2492724.78	1963775.2	836877.18	2893245.84	412399.67	447732.18	437985.38	394163.44	583535.68	453493.48
MW0145170	Antibiotic OA 6129B(sub 1)	C20H31N3O8S	456.1798	473.1832	0.6447	5.6192	82510-13-2	--	C17373	--	133928	Organoheterocyclic compounds	Lactams	1258.07	1665.02	371.07	2258.02	2113.12	913.77	2805.68	1934.52	1649.51	1912.23	1310.73	2910.33
MW0145169	Antibiotic OA 6129A	C20H31N3O7S	422.1746	457.1883	0.6311	4.9757	82475-11-4	--	C20813	--	128473	Organoheterocyclic compounds	Lactams	4624.69	4837.2	4206.2	2734.12	5144.64	5162.7	3525.6	3140.05	2967.59	4461.81	3176.79	2668.69
MW0147001	Calcium salicylate	C14H10CaO6	666.9856	314.0103	0.5692	0.67	824-35-1	--	C19600	--	517068	--	--	3479.65	4519.05	4243.37	1287.81	1704.68	3056.69	341.92	1167.41	764.68	1043.68	1013.55	475.31
MW0000752	(5-Chloro-2-methoxyphenyl)-N-methylmethanamine	C9H12ClNO	249.0765	185.0607	0.6452	0.6136	823188-85-8	--	--	--	4723324	Benzenoids	Benzene and substituted derivatives	3393.48	3476.17	4344.06	2909.84	2061.08	2633.33	3065.14	2748.13	2471.76	2717.96	5091.11	4219.47
MEDP1001	Delta-Hexalactone	C6H10O2	229.1427	114.0681	0.664	3.6451	823-22-3	HMDB0000453	-	--	13204	Aldehyde,Ketones,Esters	Esters	14946.25	15123.83	15563.17	14759.45	13634.31	14027.86	18392.66	15148.52	15302.39	15869.78	19036.42	19316.73
MW0168792	Atomoxetine; LC-ESI-ITFT; MS2; CE	C17H21NO	294.1186	255.1623	0.905	0.8394	82248-59-7	--	D07473	--	--	--	--	10613.19	17873.5	19893.16	16960.05	32482.33	20674.94	62508.64	57408.69	20716.55	24693.52	59733.77	58758.19
MW0143401	4-Methylimidazole	C4H6N2	127.0251	82.0531	0.5961	0.5687	822-36-6	--	C19262	--	13195	Organoheterocyclic compounds	Azoles	11019.58	8970.98	8904.44	9274.29	7462.72	7219.87	8055.94	9364.75	7566.25	9430.34	10656.05	8335.92
MW0007157	Flerobuterol	C12H18FNO	326.0123	211.1372	0.6445	0.5547	82101-10-8	--	--	--	71254	Benzenoids	Benzene and substituted derivatives	170177.68	164153.81	175503.01	175895.6	174328.6	173558.75	158896.64	149444.2	159137.49	140479.71	167127.95	153385.74
MEDN0604	Tetradecanedioic acid	C14H26O4	276.2168	258.1831	0.7321	5.605	821-38-5	HMDB0000872	C11002	--	13185	FA	FFA	10423.86	12085.81	10135.75	11712.38	12681.93	10868.52	21192.65	16671.95	13774.66	14150.05	19959.06	15089.09
MW0009969	Triasulfuron	C14H16ClN5O5S	841.0747	401.0561	0.6261	0.8799	82097-50-5	--	C10961	--	73282	Benzenoids	Benzene and substituted derivatives	5464.24	5572.29	6423.77	5229.09	7996.75	5423.29	8318.35	7712.57	8377.41	9407.49	8638.04	8773.01
MW0106150	Cilastatin	C16H26N2O5S	381.148	358.1562	0.7117	4.2121	82009-34-5	HMDB0015535	C01675	--	6435415	Organic acids and derivatives	Carboxylic acids and derivatives	56896.23	58300.48	54655.95	50300.91	41618.87	55245.98	32722.39	38150.09	41378.66	87720.6	40430.14	34726.25
MEDL02459	4-Pyridoxic Acid	C8H9NO4	166.0497	183.0532	0.7589	1.6358	82-82-6	HMDB0000017	C00847	--	6723	Others	Vitamin	729.6	2550.39	1793.46	2338.63	2764.22	2063.1	3307.67	2816.34	3385.82	3097.52	3802.24	3358.03
MW0006887	Diphacinone	C23H16O3	698.2534	340.1099	0.6367	0.4095	82-66-6	--	C18698	--	6719	Benzenoids	Benzene and substituted derivatives	2902.24	3414.29	3482.02	2226.1	2288.14	2359.6	3618.62	3708.27	3700.81	3235.41	2757.19	3637.96
MW0139607	Rottlerin	C30H28O8	539.1635	516.1784	0.7685	0.4303	82-08-6	--	C10721	--	5281847	Phenylpropanoids and polyketides	Diarylheptanoids	13633.52	16131.13	16475.47	15542.87	12738.58	14861.16	12240.69	13735.92	14113.42	14319.33	13189.87	13041.78
MW0152044	Kolanone	C33H42O4	467.2942	502.3083	0.8863	6.1556	81827-55-6	--	C09948	--	101844743	Lipids and lipid-like molecules	Prenol lipids	49349.78	51326.58	46622.96	55152.44	55642.24	53660.85	55945.39	58769.07	55301.54	65347.73	73123.86	56989.88
MW0152747	Lolitrem B	C42H55NO7	686.3587	685.3979	0.5508	11.0217	81771-19-9	--	C20551	--	11947793	Organoheterocyclic compounds	Naphthopyrans	32921.26	9791.48	22119.41	26286.71	12182.54	16513.47	30569.31	23302.58	971.64	32023.44	36494.95	38470.36
MW0004162	3-Oxo-N-[2-(trifluoromethyl)phenyl]butanamide	C11H10F3NO2	246.0659	245.0664	0.7278	0.6068	81761-28-6	--	--	--	366757	Benzenoids	Benzene and substituted derivatives	2244.67	2854.89	5072.7	3169.65	3633.16	4819.65	3843.82	2479.57	3759.18	4582.77	6251.66	2770.52
MW0124616	Kahweol palmitate	C36H56O4	667.2917	552.4179	0.5959	5.0707	81760-45-4	--	--	--	101046637	Organoheterocyclic compounds	Naphthofurans	15846.52	17404.58	10890.83	16739.33	17870.04	16711.28	15415.74	17184.56	18541.06	18022.21	17192.46	17150.01
MW0107787	Leucine Enkephalin	C28H37N5O7	556.278	555.2693	0.7373	7.7644	81678-16-2	--	--	24069	90477426	--	--	897.38	1709.62	1282.48	2696.04	2116.32	1986.28	2753.03	4239.24	4737.56	4222.32	3848.95	2561.87
MW0141219	10-Deoxymethynolide	C17H28O4	344.2156	296.1988	0.9947	7.1137	81644-19-1	--	C11993	--	5282031	Phenylpropanoids and polyketides	Macrolides and analogues	74563.5	106522.77	137648.65	51877.95	86459.29	105961.66	50477.22	53553.49	48978.32	54095.94	66094.91	50036.8
MW0011927	1,2-Distearoyl-sn-glycero-3-phosphocholine	C44H88NO8P	790.638	789.6248	0.5268	9.4103	816-94-4	HMDB0008036	--	--	94190	Lipids and lipid-like molecules	Glycerophospholipids	14857.5	21174.08	40908.59	5766.31	12278.67	16507.86	12004.89	8325.5	10728.74	11465.38	11570.32	7885.48
MEDN1155	4-methyl-2-oxovaleric acid	C6H10O3	150.0548	130.063	0.5533	4.747	816-66-0	-	-	--	70	Organic acid And Its derivatives	Organicacid and Its derivatives	389.14	226.09	253.0	290.61	413.68	224.04	4399.58	3594.15	2924.41	3902.13	4030.83	4103.9
MW0000858	[(2-Bromobenzoyl)amino]acetic acid	C9H8BrNO3	514.9452	256.9688	0.6262	0.5393	81568-83-4	--	--	--	133721	Benzenoids	Benzene and substituted derivatives	2293.99	2238.48	3167.2	2308.48	2476.47	2124.21	1963.27	2210.46	1872.61	2110.53	2961.03	1513.33
MEDL02745	Citpressine I	C16H15NO5	340.0581	301.095	0.6393	0.5981	81525-58-8	HMDB0029323	-	--	5494827	Alkaloids	Alkaloids	9047.36	11880.7	9571.52	7949.04	9130.06	10253.19	13228.14	9184.45	12882.95	3999.29	13422.88	11484.11
MW0008517	N-(Diphenylmethylene)glycine benzyl ester	C22H19NO2	347.1707	329.1416	0.5537	5.7607	81477-91-0	--	--	44984	11782449	Benzenoids	Benzene and substituted derivatives	5407.36	11020.71	6051.58	9169.66	10441.11	8244.44	8823.52	7542.3	1540.05	10093.01	13110.98	9516.31
MW0000158	Cabergoline	C26H37N5O2	920.6080000000001	451.2947	0.5044	9.1012	81409-90-7	HMDB0014393	C08187	--	54746	Alkaloids and derivatives	Ergoline and derivatives	1118.7	3723.89	2309.97	3242.15	2492.13	2615.23	393.28	1169.8	26059.29	827.42	1937.04	890.84
MW0004484	4-[(2,2-Diphenylacetyl)oxy]-1,1-dimethylpiperidinium cation	C21H26NO2	325.1999	324.1964	0.7112	7.4106	81405-11-0	--	--	--	1734	Benzenoids	Benzene and substituted derivatives	12710.69	14529.74	28248.68	8928.53	20241.56	9477.99	16285.92	15650.27	17954.31	18554.96	26478.48	18942.57
MW0122763	Alfuzosin	C19H27N5O4	801.3984	389.2063	0.741	4.3729	81403-68-1	HMDB0014490	D07124	45581	2092	Organoheterocyclic compounds	Diazanaphthalenes	4313.32	6520.56	4564.96	8444.96	9915.47	6022.27	4718.58	5991.02	67.55	4133.56	10405.5	5333.65
MW0141666	19(R)-hydroxy-PGF1	C20H36O6	390.2844	372.2512	0.5937	8.1896	81371-59-7	--	--	36115	5283045	Lipids and lipid-like molecules	Fatty Acyls	419843.49	484029.16	677066.82	238660.74	341393.38	473580.05	235328.17	229355.77	217667.53	269557.31	315220.89	233795.78
MW0140401	(3Z,6Z,9Z)-3,6,9-Dodecatrien-1-ol;(Z,Z,Z)-3,6,9-Dodecatrien-1-ol	C12H20O	181.1587	180.1514	0.6497	0.2562	81345-02-0	--	C08375	--	5281129	Lipids and lipid-like molecules	Fatty Acyls	4268.28	11914.01	10849.01	16331.56	11927.39	4036.27	5971.07	9202.66	23236.46	16227.14	8961.01	5386.76
MW0107526	Imazapyr	C13H15N3O3	284.0991	261.1113	0.5684	0.8368	81334-34-1	--	C18864	--	54738	Organic acids and derivatives	Carboxylic acids and derivatives	303411.24	298384.25	48630.95	423906.82	306519.7	297601.13	172612.64	212807.45	188513.79	123915.52	188041.27	90885.45
MEDN0750	(±)12-HEPE	C20H30O3	675.4011	318.2195	0.603	7.4265	81187-21-5	HMDB0010202	-	--	--	Oxidized lipids	Oxidized lipids	989.64	3519.89	2571.13	1824.95	2138.56	2251.85	2160.51	622.57	492.56	1689.59	2702.37	2327.59
MW0105294	5,8,11,14-Tetraoxa-2-azahexadecanoic acid, 16-amino-, 1,1-dimethylethyl ester	C15H32N2O6	375.1898	336.226	0.6094	4.285	811442-84-9	--	--	--	11688612	Organic acids and derivatives	Carboxylic acids and derivatives	9958.72	23163.83	21283.65	19488.57	27064.36	16422.98	31420.1	24426.25	31937.5	24551.02	34715.8	34171.96
MW0140524	(E)-2-Butenyl-4-methyl-threonine;2-Butenyl-4-methylthreonine	C9H17NO3	229.1546	187.1208	0.6497	1.33	81135-57-1	--	C12029	--	5282047	Organic acids and derivatives	Carboxylic acids and derivatives	3312.58	2585.43	3483.28	2056.23	2122.63	3920.66	345.43	1204.88	104.73	716.39	1070.98	1013.2
MW0154937	Patellamide C	C37H46N8O6S2	829.2516	762.2982	0.6447	1.2445	81120-74-3	--	C15735	--	9767970	Organic acids and derivatives	Carboxylic acids and derivatives	3082.86	2204.73	3188.68	2540.08	1530.47	2696.66	1742.83	1491.18	178.57	2444.52	2540.36	2514.64
MW0154935	Patellamide A	C35H50N8O6S2	707.3152	742.3295	0.6317	3.3416	81120-73-2	--	C15734	--	157454	Organic acids and derivatives	Carboxylic acids and derivatives	6403.12	4754.82	6617.35	8004.76	7533.15	5719.58	14332.73	10244.41	809.27	8302.49	13853.56	14611.33
MW0109521	Racecadotril	C21H23NO4S	403.1624	385.1348	0.5174	6.2347	81110-73-8	--	D08464	--	107751	Organic acids and derivatives	Carboxylic acids and derivatives	1663.2	4360.6	4838.82	1398.98	4389.16	4500.41	1631.68	1798.89	697.67	1911.51	1819.57	1633.51
MW0006596	Cisapride	C23H29ClFN3O4	483.2168	465.1831	0.6419	1.9003	81098-60-4	HMDB0014742	C06910	1777	2769	Benzenoids	Phenol ethers	151.71	1492.97	1702.08	2358.15	3721.69	2225.83	214.38	138.85	79.9	70.44	337.68	148.54
MW0154936	Patellamide B	C38H48N8O6S2	777.3303	776.3138	0.5241	4.0158	81098-23-9	--	C15736	--	4693	Organic acids and derivatives	Carboxylic acids and derivatives	360179.35	338127.6	347677.97	392762.57	284703.3	344221.54	264887.08	228689.78	224589.38	184887.78	304075.22	266946.48
MW0007547	manganese(2+); 2-methoxy-6-[2-[(3-methoxy-2-oxidanidyl-phenyl)methylideneamino]ethyliminomethyl]phenolate; chloride	C18H18ClMnN2O4	850.1016	416.0336	0.6277	0.6393	81065-76-1	--	--	44942	45489809	Benzenoids	Phenol ethers	5001.2	4621.65	3197.81	5702.79	4664.09	5888.16	1161.69	1095.34	468.1	2051.65	1637.43	1186.03
MW0145615	Aridanin	C38H61NO8	736.3584	659.4397	0.634	3.2475	81053-26-1	--	C08922	--	73146	Lipids and lipid-like molecules	Prenol lipids	3440.82	2238.33	2989.96	4690.26	5123.75	2953.86	6830.46	5356.1	6153.96	4922.24	6604.03	7372.2
MW0148341	D-Fructose,1,6-bis(dihydrogen phosphate), trisodium salt	C6H11Na3O12P2	724.9402	350.9757	0.6305	0.6864	81028-91-3	--	--	--	129893469	--	--	6367.69	2291.52	3784.41	5896.08	5723.91	5866.51	68.65	1893.53	344.54	3353.0	160.18	2531.43
MW0152077	Lactitol dihydrate	C12H24O11.2H2O	363.1498	380.153	0.6386	0.5670000000000001	81025-03-8	--	C13542	--	157354	Lipids and lipid-like molecules	Fatty Acyls	1805.72	1318.83	2345.17	890.28	2261.29	1174.09	2306.54	1463.47	1877.6	2175.32	2197.43	2182.47
MW0003730	3,9-Dibromo-7H-benz[de]anthracen-7-one	C17H8Br2O	424.8571	385.8942	0.6276	0.3722	81-98-1	--	--	--	66498	Benzenoids	Phenanthrenes and derivatives	1868.64	1505.46	1314.38	1061.24	965.67	955.63	828.39	514.35	1071.31	871.86	213.19	437.79
MW0154276	Naphthalic anhydride;1,8-Naphthalic anhydride	C12H6O3	221.0233	198.0317	0.7081	0.7193	81-84-5	--	C19125	--	6693	Benzenoids	Naphthalenes	27730.06	17333.92	17086.32	29490.31	19964.97	26542.78	29792.9	29790.48	26907.12	25347.79	30812.82	27693.42
MW0139953	Warfarin	C19H16O4	291.0918	308.1049	0.6761	4.7469	81-81-2	HMDB0001935	C01541	--	54678486	Phenylpropanoids and polyketides	Coumarins and derivatives	10239.03	18602.44	4959.5	9744.45	9348.3	6967.06	5076.65	6775.18	7941.74	5970.28	6762.09	7324.85
MEDN1153	Dehydrocholic acid	C24H34O5	403.2547	402.2406	0.524	2.3011	81-23-2	-	-	--	6674	Bile acids	Bile acids	11171.28	59395.83	57541.46	72432.58	117460.05	60854.8	7637.95	6699.19	7711.56	7428.83	7728.37	7384.53
MW0114201	Dexpanthenol	C9H19NO4	433.2521	205.1314	0.6471	2.6184	81-13-0	HMDB0004231	C05944	--	131204	Organic oxygen compounds	Organooxygen compounds	743.38	246.01	2086.23	34.17	14.1	588.98	22.73	6.67	13.82	8.56	26.42	20.05
MW0140046	(-)-Isopiperitenone;(-)-(4R)-Isopiperitenone	C10H14O	151.1117	150.1045	0.6547	4.032	80995-97-7	--	C02485	--	439733	Lipids and lipid-like molecules	Prenol lipids	359508.88	276406.56	297219.75	248244.97	198420.8	308978.7	136814.16	140538.36	144126.49	142893.13	157320.95	146245.84
MW0111021	d-Threo-PDMP	C23H38N2O3	429.2514	390.2882	0.8542	4.7184	80938-69-8	--	--	64637	16219895	--	--	6459.23	9175.48	7138.63	6975.33	7501.52	8308.64	11299.45	10123.47	9756.21	13035.05	12113.63	9633.48
MW0157156	Spergualin	C17H37N7O4	459.2838	403.2907	0.5821	6.4943	80902-43-8	--	C16747	--	15916864	Organic acids and derivatives	Carboxylic acids and derivatives	4507.04	4261.82	4233.78	2541.42	4089.27	4119.58	3641.64	4384.79	4362.51	4646.75	4330.45	4648.8
MW0147741	Concanamycin A	C46H75NO14	980.3929	865.5188	0.6217	7.9405	80890-47-7	--	C15761	--	6438151	Phenylpropanoids and polyketides	Macrolides and analogues	3405.12	3857.73	3040.5	2636.37	1398.16	4005.59	2118.56	3228.18	661.72	2783.02	5106.59	3017.25
MW0104474	2-Acetamidooctanoic acid	C10H19NO3	202.1439	201.1365	0.5273	5.0419	80782-69-0	HMDB0059745	--	--	95555	Organic acids and derivatives	Carboxylic acids and derivatives	8893.11	7950.99	5608.21	14157.89	13925.75	7845.54	11272.97	13282.04	11625.67	17344.91	13541.89	12828.82
MW0142580	2-tetracosanamidoethanesulfonic acid	C26H53NO4S	522.3833	475.3695	0.5935	11.0145	807370-75-8	--	--	3736	53442599	Lipids and lipid-like molecules	Fatty Acyls	3302.22	4215.83	12161.74	944.72	3835.74	5763.82	2118.67	2545.65	1518.54	3505.17	3494.14	2215.93
MW0147246	Castasterone	C28H48O5	465.3553	464.3502	0.5832	11.0935	80736-41-0	--	C15794	--	133534	Lipids and lipid-like molecules	Steroids and steroid derivatives	41333.08	15859.79	68082.92	14822.63	35327.2	38139.07	34812.83	17147.18	23127.35	41277.7	56570.21	45235.87
MW0004097	3-Methoxy-5-pentyl-2-prenylphenol	C17H26O2	563.349	262.1933	0.6062	9.0788	80489-92-5	--	--	--	51136386	Benzenoids	Phenols	20058.72	54803.77	35606.39	26997.9	46777.59	36837.25	18687.1	18571.4	1189.29	24004.56	24117.58	19595.86
MW0120117	4-[(3,5-Dimethyl-1H-pyrazole-4-)sulfonyl]morpholine	C9H15N3O3S	491.1739	245.0834	0.6324	7.1905	80466-86-0	--	--	--	3245583	Organoheterocyclic compounds	Oxazinanes	1989.6	1498.44	1334.62	1930.42	1658.36	845.87	1813.63	2060.4	734.28	1427.19	1392.35	1445.45
MW0013214	20-Carboxy-leukotriene B4	C20H30O6	389.191	366.2042	0.7451	7.3081	80434-82-8	HMDB0006059	C05950	36247	5280877	Lipids and lipid-like molecules	Fatty Acyls	9490.24	12491.54	13172.22	24676.45	9898.07	14318.12	7737.23	7794.35	7811.57	9090.62	8689.89	8674.01
MW0154530	Nitrovin;Difurazone	C14H12N6O6	378.1158	360.0818	0.6441	3.3184	804-36-4	--	C19487	--	6252910	Organoheterocyclic compounds	Furans	2355.44	2118.89	4840.24	1934.3	3926.5	3393.01	3163.5	2573.2	3325.34	4034.08	3540.55	3210.46
MW0062288	Protoplumericin A	C36H42O19	825.2453	778.232	0.6334	2.8882	80396-57-2	--	--	--	3563944	--	--	1824.03	2220.42	1484.42	2033.99	1770.83	1719.46	1054.9	1334.93	454.38	804.5	1727.32	700.48
MW0159439	Yiamoloside B	C43H68O15	847.445	824.4558	0.648	7.7351	80311-28-0	--	C08990	--	441956	Lipids and lipid-like molecules	Prenol lipids	5679.13	4605.74	5795.95	3693.36	6202.3	5014.87	4638.9	3392.63	4889.59	6879.39	4235.22	5896.04
MW0145634	Artemisinate;Artemisinic acid	C15H22O2	303.1539	234.162	0.596	7.2175	80286-58-4	--	C20309	--	10922465	Lipids and lipid-like molecules	Prenol lipids	3123.11	2345.66	2346.61	3585.03	5240.64	2275.69	3196.23	4302.62	4219.19	4044.08	4312.34	4502.53
MW0111134	N-(5-Benzyl-1,3-thiazol-2-yl)-2-[(4,6-dimethylpyrimidin-2-yl)sulfanyl]acetamide	C18H18N4OS2	208.0327	370.0922	0.7375	0.264	801227-82-7	--	--	--	1096276	Organic nitrogen compounds	Organonitrogen compounds	17109.67	22417.45	18366.01	16358.37	18598.53	19681.36	18081.67	18678.2	19016.01	22056.88	11644.17	19083.9
MW0055237	N-Acetylleukotriene E4	C25H39NO6S	526.2217	481.2498	0.6147	3.4675	80115-95-3	HMDB0005084	C11361	36239	4341	Lipids and lipid-like molecules	Fatty Acyls	794.98	601.91	1010.04	2086.43	1587.6	871.72	2940.18	851.45	1089.69	1485.72	3386.18	3471.54
MW0114726	Lewis B Tetrasaccharide	C26H45NO19	698.2453	675.2586	0.5407	3.1969	80081-06-7	--	--	--	45480568	Organic oxygen compounds	Organooxygen compounds	32734.53	48146.3	48039.31	36565.73	48137.92	47494.08	52904.62	49033.91	44996.46	43850.37	43519.29	43098.89
MW0006763	Diafenthiuron	C23H32N2OS	385.2216	384.2235	0.7836	7.9844	80060-09-9	--	C18781	--	3034380	Benzenoids	Benzene and substituted derivatives	11439.28	11937.48	15718.26	7635.56	9994.2	14019.54	7967.04	7507.98	6907.08	9499.9	9747.36	8348.83
MW0004534	4-[1,1'-Biphenyl]-4-yl-2-methyl-3-butyn-2-ol	C17H16O	490.2744	236.1201	0.6297	6.3625	80033-02-9	--	--	--	11379361	Benzenoids	Benzene and substituted derivatives	109965.1	105011.9	103884.34	115255.63	107514.05	101295.65	114741.75	107918.45	104452.72	121190.77	120622.45	116179.71
MEDP0888	2'-Deoxycytidine 5'-Diphosphate	C9H15N3O10P2	352.0091	387.0233	0.7496	1.3451	800-73-7	HMDB0001245	C00705	--	150855	Nucleotide And Its metabolomics	Nucleotide and Its metabolomics	2274.91	4329.14	2013.24	1316.22	2541.45	3128.91	1369.51	1647.61	1985.82	1659.18	2384.69	1791.72
MEDP1630	Pregnandiol	C21H36O2	367.2847	320.2715	0.6012	9.1832	80-92-2	HMDB0004025	-	--	219833	Hormones and hormone related compunds	Hormones and hormone related compunds	1369824.1	1590239.48	2223693.47	950841.24	1280991.28	1562943.09	920844.63	929279.87	866353.77	1114472.54	1095234.59	925597.09
MEDL01849	Solanidine	C27H43NO	124.12	397.3339	0.5971	13.924000000000001	80-78-4	HMDB0003236	C06543	--	65727	Alkaloids	Alkaloids	1056.06	1803.14	6249.2	1547.44	1201.08	1658.96	1384.39	1558.53	1180.96	2395.32	2142.49	2450.54
MW0119389	3-Amino-2-oxazolidinone	C3H6N2O2	67.029	102.0429	0.6495	11.4212	80-65-9	HMDB0060739	--	--	65725	Organoheterocyclic compounds	Azolidines	14559.69	3199.41	17294.62	18996.35	20861.91	17486.62	10575.95	15037.75	71882.37	51081.14	26729.09	22266.85
ZINC1664994	Methyl 2-chloroacrylate	C4H5ClO2	184.5524	120.535	0.5337	5.056	80-63-7	-	-	--	6659	Organic acids and derivatives	Carboxylic acids and derivatives	6867.57	6817.55	7248.86	6478.89	6066.29	7120.86	7012.75	8248.71	6600.07	6998.05	7389.33	7643.85
MW0013569	2-methylbut-2-enoic acid	C5H8O2	201.112	100.0524	0.6435	3.8579	80-59-1	HMDB0001470	C08279	--	125468	Lipids and lipid-like molecules	Fatty Acyls	24580.39	24112.19	24791.6	25631.25	27349.01	24598.9	26356.1	23943.26	26705.66	25229.39	28818.17	17225.77
MW0010733	(-)-Verbenone	C10H14O	151.1116	150.1045	0.6527	11.7731	80-57-9	--	C09913	68005	29025	Lipids and lipid-like molecules	Prenol lipids	86510.14	80048.08	64172.34	80432.03	59194.68	88989.65	74247.46	113269.01	111999.83	72882.79	96619.77	80293.36
MW0062117	p-Menthane-1,8-diol	C10H20O2	362.3265	172.1463	0.5813	5.7982	80-53-5	HMDB0035595	--	--	6651	Lipids and lipid-like molecules	Prenol lipids	73141.06	55883.44	64867.12	60288.74	98223.77	80187.5	77990.29	67287.82	87602.18	79338.98	82649.8	89526.73
MW0063769	Terpinyl acetate	C12H20O2	179.143	196.1463	0.6384	4.8209	80-26-2	HMDB0032051	C12300	--	111037	Lipids and lipid-like molecules	Prenol lipids	154683.98	295438.07	291026.18	285107.88	283980.51	183780.75	341156.95	194279.65	175509.64	185384.33	207753.93	326477.17
MW0006387	Bisphenol A	C15H16O2	251.0942	228.115	0.588	4.0158	80-05-7	HMDB0032133	C13624	--	6623	Benzenoids	Benzene and substituted derivatives	35618.17	23590.15	26686.36	20290.7	11721.29	28110.67	6425.61	7274.77	8026.13	6755.11	7988.25	6785.28
MW0007308	Hexaconazole	C14H17Cl2N3O	314.0815	313.0749	0.633	3.7097	79983-71-4	--	C18466	--	66461	Benzenoids	Benzene and substituted derivatives	2798.79	4228.85	4249.7	3800.7	4261.36	2806.38	2225.97	3440.62	2364.78	2805.92	2618.81	2584.63
MW0141695	1-arachidonoyl-2-hydroxy-sn-glycero-3-phosphate	C23H39O7P	497.20099999999996	458.2433	0.7318	5.3373	799268-65-8	--	--	265064	136212577	--	--	2553.95	3626.01	2841.04	2597.48	1559.43	3555.59	3440.42	1382.01	3688.02	3333.58	5544.4	2628.13
MW0126557	Simvastatin	C25H38O5	457.2468	418.2719	0.6904	5.3073	79902-63-9	HMDB0005007	D00434	2443	54454	Organoheterocyclic compounds	Lactones	15412.13	14928.7	15608.63	9455.45	11793.45	15297.58	13810.56	11943.96	13985.06	13239.02	18723.79	11060.11
MW0157378	Tellimagrandin I;1-Desgalloyleugeniin	C34H26O22	863.0115	786.0916	0.6212	0.6893	79786-08-6	--	C10241	--	73179	Phenylpropanoids and polyketides	Tannins	825.38	1438.41	1109.85	1541.9	2769.8	2520.74	3392.14	3426.94	2622.45	3437.8	1826.65	3857.18
MW0013231	20-Hydroxyarachidonic acid	C20H32O3	321.2425	320.2351	0.7875	6.88	79551-86-3	HMDB0005998	C14748	3843	5283157	Lipids and lipid-like molecules	Fatty Acyls	12771.14	18830.86	20878.35	11721.39	18698.43	19938.11	11574.35	11937.02	10851.72	16626.7	15874.6	13362.62
MW0013212	20-carboxy Arachidonic Acid	C20H30O4	669.4309	334.2144	0.7734	9.9722	79551-84-1	--	--	35986	6437827	Lipids and lipid-like molecules	Fatty Acyls	3532.21	5130.5	10381.06	1061.62	4379.1	4354.71	2680.71	2369.74	3011.13	2728.51	3793.74	2923.0
MW0149079	Eupacunolin	C22H28O8	484.1941	420.1784	0.6464	2.1229	79491-59-1	--	C09428	--	5281450	Lipids and lipid-like molecules	Prenol lipids	1195.88	1806.54	1638.36	2426.63	2386.62	2818.02	2185.71	2361.53	2950.49	2526.53	2655.3	3066.37
MW0141375	13-Deoxydaunorubicin;Feudomycin A	C27H31NO9	590.1194	513.1999	0.626	1.7842	79466-09-4	--	C12429	--	157384	Phenylpropanoids and polyketides	Anthracyclines	13413.1	15320.54	16058.4	16960.62	14378.43	14564.82	8336.85	8799.07	9586.58	9156.39	8717.05	9484.45
MW0001658	1-Naphthalenesulfonamide, N-(6-aminohexyl)-	C16H22N2O2S	348.1738	306.1402	0.6359	4.2392	79458-81-4	--	--	--	4314	Benzenoids	Naphthalenes	88103.87	85970.52	104175.89	75000.19	81727.16	87293.0	67891.07	63115.71	66609.21	70394.44	79891.63	59767.99
MW0114082	Ciclopirox β-D-glucuronide	C18H25NO8	767.3236	383.158	0.6372	5.9462	79419-54-8	--	--	--	92043549	Organic oxygen compounds	Organooxygen compounds	3014.29	2806.31	2889.63	4034.89	2636.99	3548.99	2490.96	3322.06	2838.5	2597.82	3051.85	3066.81
MW0116725	1,6-Diamino-2-oxo-4-phenyl-1,2-dihydro-3,5-pyridinedicarbonitrile	C13H9N5O	274.07	251.0807	0.6492	0.4396	79388-04-8	--	--	--	338057	Organoheterocyclic compounds	Pyridines and derivatives	2615.3	3038.27	2057.02	1576.27	2038.09	1233.66	2383.86	2547.86	1693.27	2665.31	1841.13	2210.07
MW0119235	3,5-Dimethyl- 4-(2-chloroethyl)-1H-pyrazole	C7H11ClN2	181.0503	158.0611	0.6446	3.8517	79379-05-8	--	--	--	911572	Organoheterocyclic compounds	Azoles	3174.02	3901.88	2694.18	3817.03	3747.54	3823.46	1057.77	2206.54	1147.15	1259.62	1128.53	1518.49
MW0120358	4-Chloro-5,6-dimethyl-2-[(4-methylpiperidin-1-yl)methyl]thieno[2,3-d]pyrimidine	C15H20ClN3S	657.1766	309.1066	0.8963	0.6595	793727-86-3	--	--	--	2566108	Organoheterocyclic compounds	Thienopyrimidines	9979.01	8655.32	13144.29	5883.76	4802.05	5328.25	11730.19	12711.79	13690.39	11148.75	9390.98	12789.97
MW0055332	Nocloprost	C22H37ClO4	447.2514	400.23800000000006	0.8913	5.2039	79360-43-3	--	--	--	6917718	Lipids and lipid-like molecules	Fatty Acyls	11350.15	12067.76	10843.79	11413.07	12122.88	12716.52	12751.52	13190.68	13000.87	11965.07	13287.87	14217.43
MW0126786	Thifensulfuron-methyl	C12H13N5O6S2	797.0516	387.0307	0.6153	0.5548	79277-27-3	--	C10957	--	73674	Organoheterocyclic compounds	Thiophenes	14330.98	13238.33	12870.24	17255.23	18805.01	13812.75	18028.8	13254.12	10053.09	9034.18	13485.24	15879.89
MW0104210	11-dehydro-2,3-dinor Thromboxane B2	C18H28O6	323.1831	340.1886	0.5588	6.4666	79250-60-5	--	--	45640	35024530	Organic acids and derivatives	Hydroxy acids and derivatives	33576.92	68527.51	63840.83	43418.17	78173.29	72777.55	43837.94	41231.18	38773.45	57081.14	64512.73	44206.88
MW0000926	[2-Amino-1-(2-chlorophenyl)ethyl]dimethylamine	C10H15ClN2	181.0897	198.0924	0.5988	4.0863	791601-04-2	--	--	--	3158580	Benzenoids	Benzene and substituted derivatives	675.58	3532.04	2461.95	3230.76	5935.24	3051.99	871.28	1004.49	1495.2	973.79	1881.42	1343.53
MW0156265	Pyrroloquinoline quinol	C14H8N2O8	287.0305	332.0281	0.8846	0.5551	79127-57-4	--	C01359	--	135398668	--	--	153349.85	154515.03	167547.38	146311.2	155104.43	154367.52	144692.3	132017.37	144674.3	135657.7	158494.61	144205.59
MW0009138	NO-Losartan A	C30H28ClN7O5	602.1917	601.184	0.63	1.8953	791122-48-0	--	--	64634	10371403	Benzenoids	Benzene and substituted derivatives	904.17	727.79	614.87	1524.46	1093.87	893.23	3577.81	3026.95	2887.79	4479.0	3209.4	3884.5
MW0103120	Vitamin K	C31H46O2	468.3894	450.3498	0.5356	10.2227	79083-00-4	HMDB0003555	C02059	--	5280483	Lipids and lipid-like molecules	Prenol lipids	309174.62	326833.52	336971.92	401551.15	327668.5	305374.43	316803.48	323100.81	324027.5	308782.93	317331.01	330062.51
MW0148959	Epithienamycin F	C13H18N2O8S2	417.0341	394.0505	0.6645	0.2816	79057-45-7	--	C17399	--	10365832	Organoheterocyclic compounds	Lactams	8706.94	7081.38	10968.24	11099.88	9776.45	4381.18	8374.0	8567.0	7302.01	4732.93	11246.05	9600.75
MW0016343	Camphene	C10H16	159.11700000000002	136.1252	0.579	4.5077	79-92-5	HMDB0059839	C06076	64046	6616	Lipids and lipid-like molecules	Prenol lipids	3700.29	3697.6	3800.37	3936.38	2517.19	2832.2	3659.64	4145.86	4182.75	2946.66	3524.98	4635.04
MEDL02200	Pantothenate	C9H17NO5	220.1187	219.1107	0.8211	2.1238	79-83-4	HMDB0000210	C00864	--	6613	Others	Vitamin	1311205.4	1268420.19	1299162.19	1371653.38	1190498.58	1236715.43	1548530.09	1385859.82	1465424.71	1451619.19	1630010.19	1653037.1
MW0054273	Lanosterol	C30H50O	511.3624	426.3862	0.7799	8.219	79-63-0	HMDB0001251	C01724	--	246983	Lipids and lipid-like molecules	Prenol lipids	9042.19	15783.65	12214.54	9258.64	12158.14	11940.28	12017.29	11111.34	11461.06	12645.16	18546.31	11382.93
MEDN1152	Dihydrolanosterol	C30H52O	514.382	428.4018	0.7333	8.4233	79-62-9	HMDB0006839	-	--	440560	Hormones and hormone related compunds	Hormones and hormone related compunds	936.4	3690.92	607.08	1621.53	1856.32	2164.18	933.72	2442.15	1836.4	2045.13	3055.37	1698.71
MW0139228	Oxytetracycline	C22H24N2O9	524.1633	460.1482	0.6109	0.6284	79-57-2	HMDB0014733	C06624	1690	54675779	--	--	3973.12	2137.6	1731.69	4501.5	59.86	2365.58	227.69	1749.84	1881.25	1885.38	2255.72	1845.07
MW0107126	Glycolic acid	C2H4O3	145.0076	76.016	0.5839	1.6948	79-14-1	HMDB0000115	C00160	--	757	--	--	82751.67	92531.05	27585.76	206400.76	92342.8	79530.74	90188.01	95849.35	5572.78	93532.91	93506.49	97416.33
MW0142932	3-Hydroxy-16-imino-17-azaandrostan-11-one	C18H28N2O2	327.2017	304.2151	0.6443	2.8518	78774-26-2	--	C13797	--	119544	--	--	323.35	414.28	294.25	289.01	516.96	320.75	247.78	199.1	282.65	300.37	204.33	203.62
MW0110842	4-Fluoro-N-(3-pyridinylmethyl)aniline	C12H11FN2	266.1066	202.0906	0.633	5.836	78675-95-3	--	--	--	645683	Organic nitrogen compounds	Organonitrogen compounds	1958.63	2406.3	1710.69	7666.14	4048.52	2797.85	3721.76	3352.07	6902.08	5030.19	3718.15	3353.39
MW0117130	1H-Spiro[benzo[4,5]imidazo[1,2-a][1,3,5]triazine-4,1'-cyclohexan]-2-amine	C14H17N5	533.2862	255.1484	0.6447	3.8723	78650-14-3	--	--	--	2983796	Organoheterocyclic compounds	Benzimidazoles	1083.16	1385.41	2243.67	3649.73	1653.59	1995.32	9126.48	6236.03	6037.06	5040.29	9340.44	8646.12
MW0119840	4-(2-Chlorophenyl)-3,4-dihydro[1,3,5]triazino[1,2-a]benzimidazol-2-amine	C15H12ClN5	282.0525	297.0781	0.7424	9.632	78650-07-4	--	--	--	2998780	Organoheterocyclic compounds	Benzimidazoles	125.34	99.48	93.35	66.14	106.44	72.9	105.03	96.14	64.92	71.96	110.44	120.11
MW0127422	Carbophenothion	C11H16ClO2PS3	380.9258	341.9739	0.5224	0.6445	786-19-6	--	C18968	--	13081	Organosulfur compounds	Thioethers	3817.4	3951.24	3903.81	5220.92	5167.44	5230.91	2000.33	1646.53	1814.38	2192.98	991.21	1243.77
MW0103367	3-Deaza-2'-deoxyadenosine	C11H14N4O3	273.1024	250.1066	0.557	4.585	78582-17-9	--	--	96553	122636	Nucleosides, nucleotides, and analogues	Imidazole[4,5-c]pyridine ribonucleosides and ribonucleotides	2838.37	3725.33	3333.6	4078.18	5058.11	2985.1	3080.69	3322.23	3217.41	2964.08	3679.42	3551.43
MW0005752	6-(4-Methylbenzenesulfonamido)hexanoic acid	C13H19NO4S	399.9787	285.1035	0.6338	0.5625	78521-39-8	--	--	--	95822	Benzenoids	Benzene and substituted derivatives	22317.53	19423.87	19684.94	13266.45	16776.25	19268.18	7239.44	8097.34	10099.44	7217.71	10486.7	7951.83
MW0123602	Diazolidinyl urea	C8H14N4O7	279.0935	278.0862	0.6482	11.3942	78491-02-8	--	--	--	62277	Organoheterocyclic compounds	Azolidines	124932.49	323175.35	108726.04	224074.79	56420.84	69070.65	95036.95	153373.9	91697.45	52781.22	55308.41	111810.4
MW0125186	Milrinone	C12H9N3O	229.1034	211.0746	0.597	0.6141	78415-72-2	HMDB0014380	C07224	1312	4197	Organoheterocyclic compounds	Pyridines and derivatives	100899.11	99140.15	105048.8	115662.33	104354.59	99644.49	158052.64	143239.65	155639.45	141006.01	176985.28	149360.97
MW0055262	N-Docosanoyltaurine	C24H49NO4S	430.3339	447.3382	0.8242	6.4943	783284-48-0	--	--	--	42607333	Lipids and lipid-like molecules	Fatty Acyls	18864.88	18741.99	18606.56	17823.78	18673.83	18601.75	18231.35	18349.07	16761.25	15697.38	17922.16	17727.85
MW0154984	Penitrem E	C37H45NO6	644.2948	599.3247	0.5937	11.4542	78213-66-8	--	C20597	--	3086087	Organoheterocyclic compounds	Naphthopyrans	4908.76	4663.73	13980.05	8982.64	4765.66	18231.02	2687.38	1452.87	1809.58	3281.13	5390.44	1582.25
MW0119541	3-Cyano-N-(2,5-diphenylpyrazol-3-yl)benzamide	C23H16N4O	431.0855	364.1324	0.632	12.2815	781652-57-1	--	--	--	11245456	Organoheterocyclic compounds	Azoles	20842.26	22896.74	17580.32	22102.51	16152.96	18043.6	15102.3	35897.49	16750.89	13895.9	24274.94	14522.82
MW0154715	Okadaic acid	C44H68O13	769.4388	804.466	0.5337	8.2771	78111-17-8	HMDB0030441	--	--	446512	Organic oxygen compounds	Organooxygen compounds	169345.79	162578.92	214517.13	136953.29	167325.82	170720.76	121220.52	123741.05	110926.85	144433.42	143732.81	131554.98
MW0120064	4,6,6-Trimethyl-3-(2-phenylethyl)-2-sulfanyl-3,4,5,6-tetrahydro-4-pyrimidinol	C15H22N2OS	579.2798	278.1453	0.6459999999999999	7.1947	78102-47-3	--	--	--	3721698	Organoheterocyclic compounds	Diazinanes	555.16	523.44	376.85	1170.22	792.99	166.78	1384.18	922.93	743.88	209.92	1118.16	1082.64
MW0118143	2-[3-[(4-Ethoxycarbonylphenyl)hydrazinylidene]-6-oxo-1-cyclohexa-1,4-dienyl]acetic Acid	C17H16N2O5	375.119	328.1059	0.628	7.1622	78028-01-0	--	--	63042	2601	Organoheterocyclic compounds	Azobenzenes	1278.29	1111.54	2620.03	1197.15	2391.85	2397.33	732.51	806.8	590.77	498.81	1381.51	1093.53
MW0114863	Methyl vinyl ketone	C4H6O	71.0492	70.0419	0.6492	0.0349	78-94-4	HMDB0061873	C20701	--	6570	Organic oxygen compounds	Organooxygen compounds	4723.87	5456.86	1497.07	1550.32	4699.22	4861.38	1151.55	437.57	1774.26	1627.28	1707.88	3572.38
MW0111062	Isobutylamine	C4H11N	170.162	73.0891	0.5261	6.5542	78-81-9	HMDB0034198	C02787	--	6558	Organic nitrogen compounds	Organonitrogen compounds	1785.1	1853.48	1668.75	2067.02	1523.56	1966.3	2048.54	2325.95	2035.51	1755.89	3874.27	2306.88
MW0151857	Isoprene;2-Methyl-1,3-butadiene	C5H8	91.0541	68.0626	0.8614	4.9829	78-79-5	--	C16521	--	6557	Hydrocarbons	Unsaturated hydrocarbons	27139.76	10469.98	9529.37	9603.07	9811.5	9810.91	9995.62	9522.51	10785.34	10095.63	11267.88	9967.61
MEDP0827	Isophorone	C9H14O	139.1115	138.1045	0.6108	3.1594	78-59-1	HMDB0031195	C14743	--	6544	Aldehyde,Ketones,Esters	Ketones	11536.4	10632.6	6643.23	14220.14	11829.96	11744.39	17119.34	17008.64	1395.93	20054.52	17072.47	17508.85
MW0110042	Tris(2-butoxyethyl) phosphate	C18H39O7P	465.1993	398.2433	0.585	3.7249	78-51-3	--	C14446	--	6540	Organic acids and derivatives	Organic phosphoric acids and derivatives	112534.81	119760.53	111682.66	119837.61	159256.1	111056.75	94433.06	97499.14	97139.39	140577.47	91995.23	89688.42
MW0127096	Butyl Phosphorotrithioate	C12H27OPS3	381.0495	314.0962	0.648	1.9736	78-48-8	--	--	44546	5125	Organophosphorus compounds	Organothiophosphorus compounds	6898.61	7208.99	11430.07	4246.77	5301.26	7276.02	1336.29	107.82	70.89	120.2	2709.62	40.24
MW0106120	Carisoprodol	C12H24N2O4	261.1852	260.1736	0.5482	6.747000000000001	78-44-4	HMDB0014539	C07927	--	2576	Organic acids and derivatives	Carboxylic acids and derivatives	203.96	4360.12	3622.77	12294.36	13533.24	4468.85	646.2	322.08	128.16	1587.28	856.92	1611.25
MW0139894	Triparanol	C27H32ClNO2	498.1675	437.2122	0.6549	3.6962	78-41-1	--	--	6203	6536	Phenylpropanoids and polyketides	Stilbenes	4140.95	4698.82	4285.69	4961.36	6601.74	4069.13	3623.01	3379.57	4233.71	3385.19	3573.64	2682.54
MW0005726	5'-O-Trityl-2'-deoxythymidine	C29H28N2O5	507.189	484.1998	0.6441	5.1001	7791-71-1	--	--	--	514178	Benzenoids	Triphenyl compounds	3351.72	2964.29	2359.33	3599.29	3288.07	3441.98	3015.56	2986.44	2864.15	2392.56	3770.81	3191.92
MW0004528	4-[(Propan-2-yl)carbamoyl]benzoic acid	C11H13NO3	225.1236	207.0895	0.5897	1.4375	779-47-5	HMDB0060608	--	--	69903	Benzenoids	Benzene and substituted derivatives	50388.25	42983.21	43616.46	55474.15	44655.02	43169.37	61427.59	33218.04	31433.17	41109.72	58424.16	65888.15
MW0114522	Gilvocarcin V	C27H26O9	989.3223	494.1577	0.6382	0.6442	77879-90-4	--	--	--	334288	--	--	1903.69	949.84	904.92	2456.31	1849.11	2749.56	4772.17	6115.96	5971.15	4998.13	2467.2	6074.43
MW0052896	Fenchone	C10H16O	153.1275	152.1201	0.6641	6.4943	7787-20-4	HMDB0034985	C09859	--	14525	Lipids and lipid-like molecules	Prenol lipids	300895.03	318335.59	326578.06	315591.13	329758.62	312863.55	351670.08	348485.81	326649.14	372743.97	380721.68	363069.52
MEDP1152	4-Vinylguaiacol	C9H10O2	133.0606	150.0681	0.6563	1.8706	7786-61-0	HMDB0013744	C17883	--	332	Benzene and substituted derivatives	Benzene and substituted derivatives	31184.06	20879.62	25777.42	28376.56	22282.66	26041.55	22070.95	24677.88	26348.83	24636.46	30616.07	23816.5
MW0010757	(+)-alpha-Terpineol	C10H18O	156.1462	154.1358	0.9602	4.8211	7785-53-7	HMDB0004043	C09902	--	442501	Lipids and lipid-like molecules	Prenol lipids	25181.19	25779.87	25709.45	25357.38	26595.77	25853.93	28191.94	29265.36	26028.82	29363.56	29997.64	28526.71
MW0140022	(-)-alpha-Pinene;(1S,5S)-2,6,6-Trimethylbicyclo[3.1.1]hept-2-ene	C10H16	159.1165	136.1252	0.7097	7.409	7785-26-4	HMDB0035658	C06308	--	440968	Lipids and lipid-like molecules	Prenol lipids	752.26	3042.39	1509.85	2801.17	2496.9	1419.39	691.17	885.44	570.71	1513.35	702.81	506.26
MW0005204	4-Methyl-1-phenyl-2-pentanol	C12H18O	161.1321	178.1358	0.6208	11.7766	7779-78-4	HMDB0031568	--	--	62661	Benzenoids	Benzene and substituted derivatives	24484.08	31874.25	48449.38	58251.58	19659.43	10184.55	16876.36	63994.08	44202.16	71388.97	9330.39	21696.6
MW0148511	Dihydromacarpine;13,14-Dihydro-5,7-dimethoxy-13-methyl-[1,3]benzodioxolo[5,6-c]-1,3-dioxolo[4,5-i]phenanthridine	C22H19NO6	432.0846	393.1212	0.6385	0.0331	77785-12-7	--	C05316	--	440631	Alkaloids and derivatives	Benzophenanthridine alkaloids	7739.56	10348.62	4741.59	13585.81	9671.67	13653.48	13067.1	4880.69	9618.7	8974.37	5689.06	3858.48
MW0123995	Ethyl 4-chloro-6-fluoro-3-quinolinecarboxylate	C12H9ClFNO2	529.0505	253.0306	0.6484	0.555	77779-49-8	--	--	--	1479088	Organoheterocyclic compounds	Quinolines and derivatives	2303.23	4021.32	5701.64	5620.26	4961.32	3407.38	4525.12	5246.02	4345.37	3613.78	3996.98	4102.53
MW0125275	N-(1,3-Diphenyl-1H-pyrazol-5-yl)benzamide	C22H17N3O	386.1503	339.1372	0.6264	3.858	77746-90-8	--	--	--	4156919	Organoheterocyclic compounds	Azoles	17793.19	14520.03	14808.08	12406.54	14932.35	15374.79	9781.15	11773.72	12314.71	11275.32	11788.6	9542.03
MW0118912	2-Thiophenethiol	C4H4S2	162.9893	115.9754	0.5729	0.5696	7774-74-5	HMDB0029720	--	--	522674	Organoheterocyclic compounds	Heteroaromatic compounds	7038.5	5820.3	6926.6	5330.71	5316.64	5873.79	4579.38	3233.06	3986.57	3885.29	4227.5	3202.37
MW0123290	Cetylpyridinium	C21H37N	304.3008	303.2926	0.5683	6.9296	7773-52-6	--	D07666	34547	2683	Organoheterocyclic compounds	Pyridines and derivatives	828.98	3143.25	2320.34	898.71	2980.25	3117.55	666.38	812.07	445.35	610.0	827.47	650.17
MW0111257	Phosphonic acid, P-[[[(1R,2S)-2-aminocyclohexyl]amino]carbonyl]-, rel-	C7H15N2O4P	286.095	222.0769	0.6287	6.4943	777075-44-2	--	--	45355	44457233	Organic nitrogen compounds	Organonitrogen compounds	26574.23	25671.13	27994.5	26992.55	27238.9	28428.62	27923.23	26398.72	25863.08	26731.43	26148.14	24051.78
MW0010555	Arctigenin	C21H24O6	762.3485	372.1573	0.6486	3.1180000000000003	7770-78-7	HMDB0030087	C10545	--	64981	Lignans, neolignans and related compounds	Furanoid lignans	378.08	424.45	151.98	2340.27	3346.37	751.95	2404.83	2408.68	2201.29	1684.25	3954.01	1885.37
MEDP1869	His-Leu	C12H20N4O3	270.1641	261.1434	0.9964	2.3453	7763-65-7	HMDB0028889	C05010	--	189008	Amino acid and Its metabolomics	Small Peptide	38223.82	56957.56	67032.93	38239.79	50695.29	55101.12	47606.3	43977.36	46331.25	52202.13	51347.32	41083.59
MW0168250	Potassium dibasic phosphate	K2HPO4	174.8956	173.8887	0.7081	0.7043	7758-11-4	--	C13197	--	24450	--	--	4017.11	4091.41	1784.6	4000.33	3574.7	2713.7	3083.99	3859.12	3642.46	2960.24	6708.39	4497.73
MW0007188	Fluoroglycofen-ethyl	C18H13ClF3NO7	448.0416	447.0333	0.5815	0.6438	77501-90-7	--	--	--	53672	Benzenoids	Benzene and substituted derivatives	6933.99	9361.48	8352.38	6866.7	7289.84	9130.58	3882.38	4741.74	4388.74	3780.74	4171.13	4290.09
MW0149241	Fluoroglycofen	C16H9ClF3NO7	856.04	419.00199999999995	0.5751	0.5506	77501-60-1	--	C18732	--	92395	Benzenoids	Benzene and substituted derivatives	3994.23	1889.37	3511.44	2257.49	2000.57	1261.21	1071.36	2509.45	2735.56	2497.98	2574.75	2610.84
MW0118209	2-Amino-3,8-dimethylimidazo[4,5-f]quinoxaline	C11H11N5	196.0986	213.1014	0.6164	2.2355	77500-04-0	HMDB0029864	C19255	--	62275	Organoheterocyclic compounds	Diazanaphthalenes	1076.68	587.35	1215.88	276.4	1175.02	1532.52	1789.89	3138.11	526.24	1776.76	2277.87	1749.1
MW0003626	3,4-Dihydroxymandelic acid	C8H8O5	149.0237	184.0372	0.7956	9.6312	775-01-9	HMDB0001866	C05580	696	85782	Benzenoids	Phenols	984775.12	1062265.81	1022688.72	1044115.22	1049628.68	917226.71	1005729.25	977395.65	1047403.38	1002883.41	1012463.95	1039735.9
MW0115949	(5-Bromo-1H-indol-3-yl)acetonitrile	C10H7BrN2	234.987	233.9793	0.6169	0.4281	774-14-1	--	--	--	13805944	Organoheterocyclic compounds	Indoles and derivatives	7407.33	7566.11	6415.75	6875.46	6807.14	5942.62	6367.71	5336.25	5715.55	6663.1	5592.63	6056.6
MW0141453	16(R)-AFP 07(free acid)	C22H30F2O5	479.1589	412.2061	0.6128	4.9830000000000005	773825-80-2	--	--	96476	95549471	--	--	2519.89	1913.73	1583.08	1276.79	2401.4	1483.32	1388.74	1330.01	791.65	1001.79	1800.49	825.84
MEDL01873	[8]-Gingerdione	C19H28O4	384.2146	320.1988	0.6486	4.865	77334-06-6	HMDB0039276	-	--	14440537	Phenolic acids	Phenolic acids	758.42	1385.51	4662.62	399.79	2899.14	231.3	6125.17	1942.06	3238.11	2830.28	4475.57	4734.36
MW0006743	Desmethylverapamil	C26H36N2O4	487.2809	440.2675	0.613	7.7351	77326-93-3	--	--	--	157039	Benzenoids	Benzene and substituted derivatives	253.38	1350.33	343.92	4227.71	1119.17	3718.54	3932.98	1593.09	1329.13	4481.51	2255.77	3392.97
MW0007745	Methyl 4-bromo-2-(methylsulfonyl)benzoate	C9H9BrO4S	606.8677	291.9405	0.5251	3.0932	773134-43-3	--	--	--	53393139	Benzenoids	Benzene and substituted derivatives	2748.23	1047.79	3074.8	1066.46	796.0	1846.03	465.79	406.04	439.0	530.48	999.43	380.61
MW0013619	2-O-methyl PAF C-18	C27H58NO6P	524.3958	523.4002	0.6566	11.4535	77286-66-9	--	--	43416	6918215	Lipids and lipid-like molecules	Glycerophospholipids	1677.69	3347.17	1998.35	2453.35	4010.65	2863.75	5451.94	4531.29	830.55	5523.24	6053.59	5320.15
MW0108345	Monoethylglycinexylidide	C12H18N2O	189.1384	206.1419	0.5895	4.9829	7728-40-7	HMDB0060656	C16561	996	24415	Organic acids and derivatives	Carboxylic acids and derivatives	37978.13	45617.24	50386.48	43401.68	46191.33	44476.97	41199.84	42011.53	45557.85	29136.33	49101.74	48270.76
MEDP1991	N6-Isopentenyladenosine	C15H21N5O4	336.1676	335.1594	0.9119	2.7426	7724-76-7	-	-	--	24405	Nucleotide And Its metabolomics	Nucleotide and Its metabolomics	5883.56	5325.93	4992.72	4460.7	4323.44	5831.77	348.77	157.89	433.38	34.95	433.26	451.49
MW0108728	N-cis-p-Coumaroyltyrosine	C18H17NO5	350.0941	327.1107	0.5660000000000001	1.7909	77201-65-1	--	--	--	51136557	Organic acids and derivatives	Carboxylic acids and derivatives	2860.19	3188.76	4350.87	1823.18	2455.23	2428.01	4414.24	5407.14	3561.66	5337.25	3783.68	3519.09
MW0005555	5'-Amino-4-methyl-[1,1'	C21H15N3	386.0457	309.1266	0.6495	6.7563	77198-51-7	--	--	--	880489	Benzenoids	Benzene and substituted derivatives	2163.14	2763.36	3478.88	1279.32	2212.54	2418.48	2027.86	1867.15	1882.89	2209.69	2745.26	1991.73
MW0144832	Alamarine	C19H18N2O4	694.2878	338.1267	0.6284	3.6073	77156-18-4	--	C09326	--	442157	Organoheterocyclic compounds	Diazanaphthalenes	1640.8	324.28	1132.65	1034.81	1675.36	500.55	1426.11	1706.23	1746.87	2050.82	2488.09	2130.11
MW0104720	2-Chloro-N-[(cyclopropylamino)carbonyl]acetamide	C6H9ClN2O2	290.9103	176.0353	0.648	0.3763	771499-64-0	--	--	--	2090935	Organic acids and derivatives	Organic carbonic acids and derivatives	12814.22	9906.02	9359.89	8950.34	8456.02	7381.88	10091.82	8001.92	6199.53	8973.85	5735.34	7424.04
MW0142409	2'-Hydroxybiphenyl-2-sulfinate;2-(2-Hydroxyphenyl)benzenesulfinate	C12H10O3S	486.1042	234.0351	0.6463	0.5652	77136-31-3	--	C06742	--	441161	Benzenoids	Benzene and substituted derivatives	1341.25	2454.7	2772.81	1529.47	1240.08	1653.29	1126.91	856.78	1915.1	1429.27	1240.17	850.35
MW0150783	Hexadecyl Acetyl Glycerol	C21H42O4	359.3154	358.3083	0.6328	6.2137	77133-35-8	--	--	43452	11024766	Lipids and lipid-like molecules	Glycerolipids	13544.16	305678.84	323683.1	391239.87	210855.64	275596.4	372339.05	355044.6	18554.79	381758.03	289786.67	311841.08
MEDP1604	Indole-3-acetonitrile	C10H8N2	203.0812	156.0687	0.5798	1.547	771-51-7	HMDB06524	C02938	--	351795	Heterocyclic compounds	Indole and Its derivatives	2756.65	2459.68	1621.06	8100.39	6556.61	2032.53	2079.63	4424.58	4333.94	5534.78	2897.66	3576.26
MW0005664	5H-Dibenzo[a,d]cyclohepten-5,10-imine, 10,11-dihydro-5-methyl-, (5S,10R)-	C16H15N	288.0738	221.1204	0.6493	4.9683	77086-21-6	--	C13737	--	180081	Benzenoids	Dibenzocycloheptenes	2108.42	1860.36	2094.03	1614.38	1650.96	1943.75	2068.39	1853.73	1114.2	1114.72	918.29	1397.56
MW0115076	Oxymorphone 3-β-D-glucuronide	C23H27NO10	972.3567	477.1635	0.5236	0.6609999999999999	770735-01-8	--	--	--	91800215	Organic oxygen compounds	Organooxygen compounds	192.22	56.1	48.95	44.74	28.91	58.41	140.89	164.85	96.51	310.4	292.61	229.27
MW0111667	1,1,1-Tris(hydroxymethyl)propane	C6H14O3	117.09100000000001	134.0943	0.6485	12.564	77-99-6	--	--	--	6510	Organic oxygen compounds	Organooxygen compounds	2320.38	1860.77	1743.31	1868.2	1450.67	1565.18	1421.4	1796.39	3011.42	2317.91	1677.71	1872.96
MW0111360	(-)-Quinic acid	C7H12O6	157.0493	192.0634	0.6347	0.8531	77-95-2	HMDB0003072	C00296	3329	6508	Organic oxygen compounds	Organooxygen compounds	16941.25	12925.18	19122.61	8897.62	11169.74	12250.74	10716.3	9685.27	10079.57	12891.22	9374.4	7450.17
MW0110025	Triethyl citrate	C12H20O7	299.115	276.1209	0.5192	7.0274	77-93-0	HMDB0034263	D06228	--	6506	Organic acids and derivatives	Carboxylic acids and derivatives	7359.41	6987.21	5672.32	7642.87	7271.47	6874.67	12929.31	8347.48	9323.86	10609.75	13127.08	8092.61
MEDN0198	Citric Acid	C6H8O7	402.0878	192.02700000000002	0.6456	1.1437	77-92-9	HMDB0000094	C00158	--	311	Organic acid And Its derivatives	Organicacid and Its derivatives	4898.59	3972.72	7993.42	4376.99	4218.84	5613.37	2723.14	1987.75	3247.56	1789.69	2989.19	2769.81
MW0111075	L-Gamma-Glutamyl-L-Amino Acid	C4H11NO3	86.06	121.0739	0.6479	1.4741	77-86-1	HMDB0240288	C07182	--	6503	Organic nitrogen compounds	Organonitrogen compounds	2105.2	4359.52	2688.83	2690.49	4884.95	2841.3	2092.78	2608.12	2014.43	1904.15	2635.04	1872.55
MW0016968	Cedrol	C15H26O	264.2322	222.1984	0.5557	5.0266	77-53-2	--	C09631	--	65575	Lipids and lipid-like molecules	Prenol lipids	63914.2	60997.69	60101.57	56255.89	55665.28	66245.01	54285.05	58290.57	54293.27	60559.1	57022.35	56734.92
MW0123180	Butalbital	C11H16N2O3	487.1955	224.1161	0.8905	4.8357	77-26-9	HMDB0014386	D03182	--	2481	Organoheterocyclic compounds	Diazines	58970.09	60488.97	60381.35	68617.88	64673.1	58814.74	60528.17	62271.37	63119.2	57999.99	56840.76	51901.56
MW0107035	Glutethimide	C13H15NO2	284.0597	217.1103	0.5094	5.5312	77-21-4	HMDB0015505	C07489	--	3487	Organoheterocyclic compounds	Piperidines	40272.85	19980.09	14632.8	44556.32	41024.64	15335.65	27270.28	25404.69	24672.7	42509.15	29175.43	30671.31
MW0124225	Garcinone C	C23H26O7	397.1643	414.1679	0.7291	2.6574	76996-27-5	HMDB0029511	--	--	44159808	Organoheterocyclic compounds	Benzopyrans	37755.25	35769.4	31472.95	80074.07	69558.0	32697.68	111149.38	81451.09	79512.07	57037.0	127738.96	114255.56
MW0117283	1-Piperidinecarboxylic acid, 4-(4-bromophenyl)-, 1,1-dimethylethyl ester	C16H22BrNO2	717.1296	339.0834	0.6325	0.6792	769944-78-7	--	--	--	27281782	Organoheterocyclic compounds	Piperidines	4681.59	502.39	1514.07	6881.06	2675.65	2790.56	6057.25	7708.81	3018.71	6491.2	5929.31	7314.15
MW0147526	cis-1,2-Diphenylcyclobutane	C16H16	272.1408	208.1252	0.6339	0.5402	7694-30-6	HMDB0031821	C14467	--	111326	Phenylpropanoids and polyketides	Stilbenes	1040.61	2092.92	4037.29	5602.52	6171.99	9032.57	5400.58	6470.92	10350.13	6577.52	5951.97	10967.47
MW0146553	Beiwutine	C33H45NO12	689.3282	647.2942	0.6419	11.1553	76918-93-9	--	C08663	--	21627927	Lipids and lipid-like molecules	Prenol lipids	3504.96	2989.49	1797.11	46.38	1135.79	6080.42	3117.1	3774.22	3842.3	3841.38	4998.94	6421.17
MW0000166	Camptothecin	C20H16N2O4	371.1011	348.111	0.5611	10.9765	7689-03-4	--	C01897	3491	24360	Alkaloids and derivatives	Camptothecins	1840.49	379.63	774.39	839.1	704.34	418.23	48057.18	769.18	7046.13	2400.31	1217.45	1161.03
MW0007422	Isoprenaline	C11H17NO3	423.2488	211.1208	0.6449	4.9829	7683-59-2	HMDB0015197	C07056	--	3779	Benzenoids	Phenols	4629.91	3948.54	3166.52	1535.56	3981.48	5244.96	5372.37	4823.6	3568.07	3638.02	2160.17	1888.2
MW0126072	Pepcid	C8H15N7O2S3	376.0087	337.0449	0.6095	0.5548	76824-35-6	HMDB0001919	D00318	--	5702160	--	--	4458.86	5241.28	8738.16	4402.59	6716.44	7333.12	3836.15	4249.93	4278.84	1709.11	4742.18	3609.83
MW0121331	5-Carboxyfluorescein	C21H12O7	418.0923	376.0583	0.6352	3.2163	76823-03-5	--	--	--	123755	Organoheterocyclic compounds	Benzopyrans	1470.63	1442.81	1075.15	1290.89	1941.87	1276.67	1704.97	1277.31	1909.83	1813.54	1593.94	1690.83
MW0159624	Sodium iodate	NaIO3	396.7657	197.87900000000002	0.6209	6.4943	7681-55-2	--	C18366	--	--	--	--	494.65	728.32	695.64	1276.57	935.47	919.4	1252.53	1559.83	1246.67	1729.62	1462.09	820.64
MW0110906	Amantadine	C10H17N	325.2645	151.1361	0.5763	8.4975	768-94-5	HMDB0015051	C06818	--	2130	Organic nitrogen compounds	Organonitrogen compounds	15652.4	19547.01	25510.81	12305.19	16984.08	19067.14	12199.33	12337.38	11416.59	13214.14	13012.52	11960.36
MW0118862	2-Pyrazinecarbohydrazide	C5H6N4O	299.0972	138.0542	0.8635	0.5625	768-05-8	--	--	--	258796	Organoheterocyclic compounds	Diazines	11510.73	9755.19	12713.74	10050.95	11609.34	9184.43	9885.37	7015.23	9865.26	8794.29	8763.37	11540.6
MW0116272	1-(2,2-Difluoroethyl)piperazine	C6H12F2N2	318.228	150.0969	0.6201	3.9164	767609-14-3	--	--	--	19622797	Organoheterocyclic compounds	Diazinanes	1589.94	1644.31	1503.03	1541.4	1545.22	1694.52	2538.52	1782.86	1901.15	3547.13	2566.96	2524.67
MW0009323	Paclobutrazol	C15H20ClN3O	276.1263	293.1295	0.6414	6.1552	76738-62-0	--	--	--	616765	Benzenoids	Benzene and substituted derivatives	4742.56	4136.36	4156.96	5224.12	4121.36	3938.66	6501.76	6329.56	6210.45	6323.68	6381.8	6028.9
MW0154044	Myxothiazol A	C25H33N3O3S2	997.3822	487.1963	0.6392	0.6181	76706-55-3	--	C15674	--	10972974	Organoheterocyclic compounds	Azoles	963.67	550.19	790.04	1751.45	1488.71	754.63	5952.97	4383.03	6316.59	5331.74	5733.97	5823.01
MW0136621	6-Bromo-2-oxo-2H-chromene-3-carbonitrile	C10H4BrNO2	293.9136	248.9425	0.627	0.3743	76693-35-1	--	--	--	776095	Phenylpropanoids and polyketides	Coumarins and derivatives	2964.32	2966.42	2797.86	1712.64	2090.02	2220.16	2735.64	2494.39	2464.74	2148.35	2575.27	3021.22
MEDP0637	Phe-Pro	C14H18N2O3	263.1394	262.1317	0.8029	2.7963	7669-65-0	HMDB0011177	-	--	7020642	Amino acid and Its metabolomics	Amino acid derivatives	6968.17	5038.76	11160.11	10383.93	10943.64	11964.6	9435.95	8830.85	10273.73	10472.02	10620.78	9551.82
MW0108473	N-(N-(3-Carboxyoxirane-2-carbonyl)leucyl)isoamylamine	C15H26N2O5	315.188	314.1842	0.6238	0.6291	76684-89-4	--	--	44982	123664	Organic acids and derivatives	Carboxylic acids and derivatives	72517.43	69058.68	78871.21	79358.81	69140.53	65232.99	170274.3	161657.09	162457.4	147601.2	180540.52	156410.15
MEDN1149	N-hexadecyl hydroxyproline	C21H41NO3	402.3211	355.3086	0.8748	8.2771	76652-69-2	-	-	--	--	Amino acid and Its metabolomics	Amino acid derivatives	587253.94	666938.67	683186.57	517352.75	599913.63	641584.77	462668.3	435290.06	439709.28	491838.66	457839.97	437148.94
MW0010218	Sulfate	H2SO4	140.0018	97.9674	0.7083	0.5696	7664-93-9	HMDB01448	C00059	--	--	--	--	123415.64	118008.03	133352.94	105491.06	110282.55	119382.05	76588.45	74764.86	92145.77	95100.84	107857.58	82890.63
MW0118358	2-Butylquinoline	C13H15N	388.2742	185.1204	0.6013	1.7697	7661-39-4	--	--	--	459597	Organoheterocyclic compounds	Quinolines and derivatives	23806.26	26337.3	41694.42	14968.57	21882.61	26713.62	11231.81	9751.09	11444.69	26350.82	13484.68	8898.54
MW0003715	3,5-Dinitrocatechol	C6H4N2O6	438.9764	200.0069	0.6054	1.1567	7659-29-2	--	--	44188	3870203	Benzenoids	Phenols	3854.38	3312.98	2943.87	3060.2	3135.25	3223.35	2320.58	3183.74	2447.7	1799.69	4204.76	1648.62
MW0009633	Quizalofop-ethyl	C19H17ClN2O4	373.0996	372.0877	0.7316	13.6304	76578-14-8	--	C18530	--	53518	Benzenoids	Benzene and substituted derivatives	222621.54	174610.31	133849.35	214130.62	106515.56	144286.01	100214.57	98833.4	171576.53	147346.19	98082.95	196554.67
MW0107891	Lisinopril	C21H31N3O5	428.205	405.2264	0.5416	5.2185	76547-98-3	HMDB0001938	D08131	--	5362119	--	--	4071.98	2624.42	6645.82	3657.44	3106.73	4174.79	5899.91	3514.46	633.88	3958.78	3862.88	4396.28
MW0111690	1,2-Cyclohexanedione	C6H8O2	113.0597	112.0524	0.65	11.7901	765-87-7	HMDB0031344	C06105	--	13006	Organic oxygen compounds	Organooxygen compounds	30736.28	28545.93	19710.8	19943.5	9810.92	20117.97	18821.6	18764.06	4367.91	16437.36	17335.44	16377.93
ZINC1562127	10-Hydroxy-2-decenoic acid	C10H18O3	187.1328	186.25099999999998	0.7689	3.1267	765-01-5	-	-	--	5312738	Organic acids and derivatives	Hydroxy acids and derivatives	68751.23	91510.2	91702.51	84919.59	94935.55	88963.51	118605.93	107765.02	117000.87	119580.49	121343.63	129410.06
MEDL02656	Chalcomoracin	C39H36O9	687.2	648.236	0.6094	4.2410000000000005	76472-89-4	HMDB0030069	-	--	434768	Others	Others	28075.48	25255.19	28038.22	23472.59	19281.84	25353.31	18907.41	13259.94	4496.51	17598.98	16112.36	17588.82
MW0152055	Kuwanone H	C45H44O11	805.2591	760.2884	0.6264	0.6435	76472-87-2	HMDB0030075	C10100	--	5281668	Phenylpropanoids and polyketides	Flavonoids	6781.48	1256.2	6906.07	4367.5	4280.1	6538.51	11929.31	2818.41	7014.76	3634.07	11410.73	4731.75
MW0106589	Enalaprilat dihydrate	C18H28N2O7	385.1967	384.1897	0.6269	3.2547	76420-72-9	--	D03769	--	6917719	Organic acids and derivatives	Carboxylic acids and derivatives	11817.77	12129.8	21166.15	13139.19	15494.85	12766.97	13567.58	12546.48	12986.37	15603.29	17202.04	15373.48
MW0013531	2-Hydroxypalmitic acid	C16H32O3	290.2691	272.2351	0.6452	5.8575	764-67-0	HMDB0031057	--	34495	92836	Lipids and lipid-like molecules	Fatty Acyls	6570.39	5650.95	4542.66	4898.85	5399.59	5154.16	4598.2	5951.02	4178.47	4889.37	5961.63	8218.93
MW0110980	D-erythro-Sphinganine	C18H39NO2	302.306	301.2981	0.7889	6.4346	764-22-7	HMDB0000269	C00836	395	91486	Organic nitrogen compounds	Organonitrogen compounds	376543.13	419307.07	182716.13	292673.4	244998.37	244678.73	297761.24	388264.42	195828.93	318953.81	428976.11	376657.96
MW0152148	Latrunculin A	C22H31NO5S	386.1783	421.1923	0.7613	3.5481	76343-93-6	--	--	64706	445420	Phenylpropanoids and polyketides	Macrolides and analogues	11587.38	16139.05	15366.24	14457.52	20763.22	21644.51	12017.32	17469.41	14770.29	18192.95	18482.79	12594.39
MW0000410	Psychotrine	C28H36N2O4	465.2603	464.2675	0.5257	5.2626	7633-29-6	--	--	--	3496498	Alkaloids and derivatives	Emetine alkaloids	2108.22	4287.64	2026.24	4159.83	4321.12	2502.09	2881.96	2930.66	2168.48	6295.85	6371.93	3165.41
MW0119148	3,3'-(2-Oxopropane-1,3-diyl)bis(3-hydroxyindolin-2-one)	C19H16N2O5	429.0251	352.1059	0.6473	9.1793	76325-81-0	--	--	--	299561	Organoheterocyclic compounds	Indoles and derivatives	2213.74	2299.72	3312.97	1305.84	1411.58	1625.79	1063.26	584.33	282.46	867.39	1031.51	1241.64
MEDL01746	3-Methylbutyl glucosinolate	C12H23NO9S2	412.0708	389.0814	0.6455	0.6136	76265-22-0	HMDB0038412	-	--	131752360	Others	Glucosinolates	1622.72	2495.93	1697.18	4783.87	2042.59	4340.11	3671.8	3158.19	2535.13	2021.46	3226.04	2979.06
MW0119697	3-Methyl-3H-imidazo[4,5-f]quinolin-2-amine	C11H10N4	199.0942	198.0905	0.555	2.5683	76180-96-6	HMDB0029706	C19180	--	53462	Organoheterocyclic compounds	Quinolines and derivatives	23622.08	27695.49	28889.83	27251.02	30110.88	28948.52	27081.22	29400.65	26905.83	25696.72	32765.01	28040.12
MW0108336	Mildronate	C6H14N2O2	331.1756	146.1055	0.5983	3.1706	76144-81-5	--	D10504	--	123868	Organic acids and derivatives	Carboxylic acids and derivatives	42192.81	42974.24	38805.79	22396.07	29348.82	46761.5	24985.35	20461.44	25902.67	25530.76	25816.58	20401.19
MW0004220	4-(2,3-Dihydro-1H-perimidin-2-yl)-N,N-dimethylaniline	C19H19N3	601.3042	289.1579	0.6027	5.8867	76139-80-5	--	--	--	256660	Benzenoids	Naphthalenes	299.23	1576.3	1118.42	2631.58	1835.49	1257.88	1489.99	1902.51	106.43	2678.07	1701.35	1867.93
MW0140540	(E)-Cinnamoyl-CoA	C30H42N7O17P3S	898.1667	897.1571	0.5708	0.6513	76109-04-1	--	C00540	--	6444037	Lipids and lipid-like molecules	Fatty Acyls	2850.17	3006.38	3268.13	2682.71	1059.18	913.68	1800.64	1166.39	2281.15	2542.26	1463.07	386.06
MW0116369	1-(3-Bromo-4-methylphenyl)piperidine	C12H16BrN	329.9659	253.0466	0.6381	0.6888	761001-65-4	--	--	--	46739304	Organoheterocyclic compounds	Piperidines	12616.96	8106.28	6782.7	12193.64	9263.41	6797.13	5368.12	5940.41	5215.29	7157.21	3064.28	6313.82
MW0156574	Scorpioidin	C16H20O4	277.14099999999996	276.1362	0.6057	5.4856	76045-40-4	--	C09548	--	11953939	Lipids and lipid-like molecules	Prenol lipids	2981.65	3200.09	2848.17	4214.12	4139.27	2814.69	4420.02	6892.77	6955.88	8043.41	7745.6	6351.2
MW0063252	Quassin	C22H28O6	389.1941	388.1886	0.6461	6.7127	76-78-8	HMDB0036587	--	--	5320819	Lipids and lipid-like molecules	Prenol lipids	4130.78	1524.25	5533.46	662.31	760.29	4025.4	394.42	551.26	222.84	165.1	549.28	208.37
MW0123165	Bromothymol blue	C27H28Br2O5S	660.9653	622.0024	0.6327	0.6591	76-59-5	--	--	--	6450	Organoheterocyclic compounds	Benzofurans	18037.94	20026.76	17993.48	26395.68	23597.91	23746.75	12932.52	12907.06	6268.96	15736.82	8527.57	14524.22
MW0000185	Codeine	C18H21NO3	300.1572	299.1521	0.8006	6.3549	76-57-3	HMDB0004995	--	--	5702288	Alkaloids and derivatives	Morphinans	17316.03	20617.91	17941.66	30918.21	30974.64	20568.75	67321.12	63787.97	63551.91	47353.12	87771.62	68944.84
MW0052926	Fluoxymesterone	C20H29FO3	400.2255	336.2101	0.6211	0.6289	76-43-7	HMDB0015316	D00327	--	6446	Lipids and lipid-like molecules	Steroids and steroid derivatives	520.71	44.37	264.42	334.18	1853.65	1112.77	5887.6	5255.28	3967.51	3936.09	5007.13	5273.26
MW0102919	Triamcinolone acetonide	C24H31FO6	435.2141	434.2105	0.59	8.138	76-25-5	--	C08183	--	6436	Lipids and lipid-like molecules	Steroids and steroid derivatives	4433.36	2614.56	6704.09	917.85	772.43	3094.02	605.29	304.49	63.68	667.71	744.6	368.76
MW0121744	6-(4-Chlorobenzyl)-2,3-dihydro-5H-[1,3]thiazolo[3,2-a]pyrimidine-5,7(6H)-dione	C13H11ClN2O2S	627.0102	294.02299999999997	0.8459	0.5548	75963-52-9	--	--	--	128798	Organoheterocyclic compounds	Diazines	15542.94	13360.58	16189.35	12945.13	20253.69	26203.05	11369.55	9390.12	11159.63	9059.1	11380.07	9121.8
MW0143235	4-[2,2-Dichloro-1-(4-methoxyphenyl)ethenyl]phenol;Monohydroxymethoxychlor olefin	C15H12Cl2O2	611.0323	294.0214	0.8894	0.5547	75938-34-0	--	C14237	--	156639	Benzenoids	Benzene and substituted derivatives	26957.02	28806.83	28657.66	30649.46	28222.44	27619.28	27778.98	23468.16	28060.22	25591.74	28946.16	26337.92
MEDP1470	Diethyl 2-methyl-3-oxosuccinate	C9H14O5	244.2351	202.2	0.5553	12.4388	759-65-9	HMDB0032306	C07056	--	97750	Aldehyde,Ketones,Esters	Aldehydes	3429.91	2554.04	2258.48	1463.09	934.73	1396.58	1363.65	1652.84	5046.68	1391.42	1544.56	2603.08
MW0014501	4-Hydroxynonenal	C9H16O2	139.1116	156.115	0.593	11.7695	75899-68-2	HMDB0004362	C21642	--	5283344	Lipids and lipid-like molecules	Fatty Acyls	248049.0	379443.21	289252.01	152306.95	168124.04	235414.67	246351.83	168419.74	163407.57	157284.33	267111.69	254321.53
MW0012516	16,16-Dimethyl-6-ketoprostaglandin E1	C22H36O6	419.2204	396.2512	0.7978	8.4083	75874-32-7	--	--	45595	10905349	Lipids and lipid-like molecules	Fatty Acyls	3281.78	1308.28	5977.17	385.55	332.15	1890.78	159.39	87.81	130.21	162.63	193.41	220.7
MW0168878	C20H28N2O5; PlaSMA ID-2094	C20H28N2O5	394.2339	376.1998	0.6369	2.5733	75847-73-3	--	C06977	--	--	--	--	1321.52	1837.27	3854.78	1142.06	910.61	1909.29	361.96	334.5	39.2	528.24	394.45	236.49
MW0000667	(3-Bromophenyl)(3-fluorophenyl)methanone	C13H8BrFO	341.9896	277.9743	0.6145	0.5552	75762-58-2	--	--	--	19780750	Benzenoids	Benzene and substituted derivatives	24033.65	19201.31	23817.07	13741.29	16568.6	25349.53	12836.28	8134.08	13109.32	11871.9	13426.28	10288.8
MW0120329	4-Chloro-1,1-dioxidotetrahydro-3-thienyl acetate	C6H9ClO4S	230.0251	211.99099999999999	0.6362	2.5682	75754-25-5	--	--	--	282947	Organoheterocyclic compounds	Thiolanes	644.06	1113.08	1383.49	1209.6	1260.64	1107.55	1267.22	1179.32	717.36	1038.66	930.85	730.65
MW0104055	[(5E)-5-(3-Ethyl-1,3-benzothiazol-2(3H)-ylidene)-4-oxo-2-thioxo-1,3-thiazolidin-3-yl]acetic acid	C14H12N2O3S3	705.0083	352.001	0.6057	0.6592	7570-41-4	--	--	--	3115056	Organic acids and derivatives	Carboxylic acids and derivatives	20463.99	11214.37	18060.41	27162.84	26577.79	6961.43	8313.31	14191.05	16311.97	17577.1	8293.01	19407.79
MW0124519	Isradipine	C19H21N3O5	394.1408	371.1481	0.6573	4.271	75695-93-1	HMDB0014415	D00349	872	3784	Organoheterocyclic compounds	Benzoxadiazoles	6806.41	10167.09	8709.99	8037.6	7216.67	8803.07	7809.96	10161.79	9183.88	31537.92	7688.73	8550.58
MEDP1647	2-Amino-1-phenylethanol	C8H11NO	120.0811	137.0841	0.8645	1.8952	7568-93-6	HMDB0001065	C02735	--	1000	Alcohol and amines	Alcohols	795146.48	974659.32	1121382.17	1159024.74	1292126.87	997345.74	445074.5	460128.77	469926.35	475882.7	505085.89	478578.23
MW0108050	Lys-Gly	C8H17N3O3	424.2898	203.127	0.5692	3.6010000000000004	7563-03-3	--	--	65079	7022320	Organic acids and derivatives	Carboxylic acids and derivatives	17728.58	17936.04	17558.77	17351.86	18302.38	18037.13	23458.67	22395.33	21385.65	21156.98	26062.31	23699.56
MW0013870	3-[(Cholamidopropyl)dimethylammonio]-1-propanesulfonate	C32H58N2O7S	637.3746	614.3965	0.5056	3.718	75621-03-3	--	C11321	--	107670	Lipids and lipid-like molecules	Steroids and steroid derivatives	83014.13	88605.75	88094.98	97511.23	98495.74	91732.4	92687.1	102529.7	94133.1	103623.81	98291.57	100333.94
MW0103564	Fludarabine 5'-monophosphate	C10H13FN5O7P	327.1214	365.0537	0.5798	6.4944	75607-67-9	HMDB0015206	D01907	--	30751	Nucleosides, nucleotides, and analogues	Purine nucleotides	70680.38	71805.79	74636.54	77559.4	74880.69	75526.32	77257.51	75599.11	72727.03	76569.34	75573.84	71524.81
MW0123501	Debromohymenialdisine	C11H11N5O2	491.1798	245.0913	0.5212	0.7628	75593-17-8	--	C19897	--	135451156	--	--	2824.72	4650.12	2770.85	8671.89	6217.06	5064.0	5505.24	6347.9	4113.11	5548.04	4688.6	5579.49
MW0004415	4,1-Benzothiazepin-2(3H)-one, 7-chloro-5-(2-chlorophenyl)-1,5-dihydro-	C15H11Cl2NOS	646.9937	322.9938	0.5879	0.6591	75450-34-9	--	--	--	2688	Benzenoids	Benzene and substituted derivatives	1247.59	2446.78	683.09	1805.75	2062.27	2901.73	667.49	204.65	611.65	799.37	358.36	577.41
MW0003812	3-Amino-4-hydroxyphenyl sulfone	C12H12N2O4S	281.0514	280.0518	0.6049	10.6779	7545-50-8	--	--	4086	82047	Benzenoids	Benzene and substituted derivatives	39.85	47.41	24.37	52.68	40.37	54.28	29.9	61.29	36.78	51.47	51.47	36.6
MW0169686	PIRENPERONE	C23H24FN3O2	484.1735	393.1853	0.652	3.7933	75444-65-4	--	D05495	44422	4847	--	--	4245.96	10348.32	4298.1	4993.35	5507.28	4454.85	6327.15	6975.15	5577.05	7219.58	5661.24	6388.3
MW0061660	Phytol	C20H40O	297.3153	296.3079	0.7811	11.8003	7541-49-3	HMDB0002019	C01389	--	5280435	Lipids and lipid-like molecules	Prenol lipids	7402.28	8793.09	2356.01	9697.06	9587.69	12232.48	8645.81	8012.72	4995.37	1149.06	7367.46	11029.56
MW0152769	L-Prolinamide;(S)-Pyrrolidine-2-carboxamide	C5H10N2O	159.0504	114.0793	0.6304	0.5548	7531-52-4	--	C19781	--	111306	Organoheterocyclic compounds	Pyrrolidines	1562.86	3340.61	961.6	3983.96	3181.52	3176.54	3074.97	3551.04	3970.35	2334.86	2194.66	2647.67
MW0107931	Lovastatin acid	C24H38O6	423.2714	422.2668	0.904	7.8229	75225-51-3	--	C21130	--	64727	Organic acids and derivatives	Hydroxy acids and derivatives	78500.93	44261.88	58885.05	57672.52	41854.64	46881.41	30588.55	30735.11	59498.43	35538.2	40212.26	61468.93
MW0014138	3-Isobutylpentanedioic acid	C9H16O4	211.0942	188.1049	0.6494	4.4468	75143-89-4	--	--	--	10976240	Lipids and lipid-like molecules	Fatty Acyls	722.42	1159.68	903.04	1456.01	1249.53	755.79	2082.88	1922.33	165.77	1748.04	1872.91	1909.06
MEDP0232	N-Acetyl-D-Glucosamine	C8H15NO6	204.0867	221.0899	0.5795	6.1107	7512-17-6	HMDB0000215	C00140	--	439174	Carboxylic acids and derivatives	Sugar derivatives	2583.58	2233.57	1770.75	5273.36	4367.12	2477.54	7554.05	6463.15	5101.37	7987.32	9065.98	8295.32
MW0054684	Manoalide	C25H36O5	439.2452	416.2563	0.6203	9.0443	75088-80-1	--	C17156	--	6437368	Lipids and lipid-like molecules	Prenol lipids	11835.8	6768.03	19792.64	3952.25	3644.23	8894.04	2706.96	3096.61	2415.2	2904.16	2286.53	1884.78
MW0112102	2-Chloro-1-(2-hydroxy-3,4-dimethoxyphenyl)ethanone	C10H11ClO4	268.998	230.0346	0.6363	1.3259	7507-92-8	--	--	--	344485	Organic oxygen compounds	Organooxygen compounds	742.3	5020.5	2234.7	5035.74	5723.34	2396.49	8140.25	6160.56	7731.04	6435.68	6999.47	7296.62
MW0113852	Acetone cyanohydrin	C4H7NO	155.045	85.0528	0.7181	2.3748	75-86-5	HMDB0060427	C02659	--	6406	Organic oxygen compounds	Organooxygen compounds	5135.72	5303.33	4792.16	5162.65	5537.74	5057.54	5475.34	4720.95	5093.31	5382.46	4907.48	5809.07
MW0112202	2-Methyl-2-butanol	C5H12O	199.148	88.0888	0.6594	13.179	75-85-4	HMDB0033772	C21401	--	6405	Organic oxygen compounds	Organooxygen compounds	2709.61	1288.42	1409.18	1240.72	1104.55	1298.97	1481.53	2183.76	1392.03	1544.51	1815.19	3807.31
MEDN0741	Methanesulfonic acid	CH4O3S	138.0219	95.9881	0.6485	2.5442	75-75-2	-	C11145	--	6395	Organic acid And Its derivatives	Sulfonic acids	3662.34	2799.61	2358.94	1727.14	768.54	2162.82	972.34	1738.25	1809.26	4394.65	1067.83	994.84
MW0141050	1,1-Dichloroethylene;Vinylidene chloride;1,1-DCE	C2H2Cl2	159.9698	95.9534	0.6026	7.265	75-35-4	--	C14039	--	6366	Organic oxygen compounds	Organooxygen compounds	18697.74	18589.54	12126.33	22777.45	19434.3	15524.25	18018.3	17044.74	16549.55	16868.34	16918.53	11247.24
MW0119028	3-(4-Bromophenyl)-5,6-dihydroimidazo[2,1-b][1,3]thiazole	C11H9BrN2S	577.9687	279.967	0.6028	0.6587	7496-59-5	--	--	--	346934	Organoheterocyclic compounds	Imidazothiazoles	1881.48	1985.13	665.54	1714.41	2093.39	2547.07	879.87	1010.54	579.42	498.1	243.18	368.47
MW0109279	Piracetam	C6H10N2O2	143.0814	142.0742	0.5946	1.4083	7491-74-9	--	D01914	44173	4843	Organic acids and derivatives	Carboxylic acids and derivatives	10120.98	3447.42	3066.5	9552.03	3389.92	4257.41	3542.46	3601.36	3871.07	3512.42	4156.51	3023.52
MW0148583	Diphenhydramine salicylate	C17H21NO.C7H6O3	457.2092	393.194	0.6115	9.0435	7491-10-3	--	C14015	--	24098	--	--	3995.43	4003.15	6742.09	2850.03	2213.09	2235.09	2357.97	1928.75	2271.37	2405.34	2159.32	2215.67
MW0115426	Trifluperidol	C22H23F4NO2	392.1633	409.1665	0.6425	2.5848	749-13-3	--	D02625	--	5567	Organic oxygen compounds	Organooxygen compounds	3605.95	1754.76	1232.17	3172.66	4260.56	3822.88	593.37	1033.93	2314.89	1654.72	3322.67	2987.57
MW0115313	Spiperone	C23H26FN3O2	437.2292	395.2009	0.5491	8.3942	749-02-0	--	D01051	43483	5265	Organic oxygen compounds	Organooxygen compounds	64160.72	28458.26	77742.29	13462.83	10188.16	46075.58	5328.61	5602.53	5101.75	5783.83	5960.7	5615.17
MW0105695	Argatroban;(2R,4R)-4-Methyl-1[Nalpha-[(3-methyl-1,2,3,4-tetrahydro-8-quinolinyl)sulfonyl]-L-arginyl]-2-piperadinecarboxylic acid	C23H36N6O5S	555.2594	508.2468	0.638	3.3364	74863-84-6	HMDB0014423	D00181	--	92722	Organic acids and derivatives	Carboxylic acids and derivatives	4324.98	2460.84	1007.04	4034.71	638.03	2225.11	5158.93	5809.27	5510.53	6196.32	7517.05	4619.94
MW0147305	Cefpiramide sodium	C25H23N8O7S2.Na	698.1218	634.1029	0.5209	1.3727	74849-93-7	HMDB0014574	C13376	--	23663969	Organic acids and derivatives	Carboxylic acids and derivatives	1864.13	1021.88	774.84	2919.75	2742.51	319.16	5312.04	3424.32	4801.07	3317.2	4169.2	3766.92
MW0012345	13S-HOTrE(gamma)	C18H30O3	336.2528	294.2195	0.6146	8.3642	74784-20-6	--	--	35514	5282971	Lipids and lipid-like molecules	Fatty Acyls	225.46	592.99	308.13	641.09	319.93	473.52	2554.47	2254.68	2360.44	1134.73	2541.87	2341.98
MW0132598	3',4'-Dimethoxy-2'-hydroxychalcone	C17H16O4	569.2115	284.1049	0.6406	2.9092	7478-65-1	HMDB0133973	--	--	5385206	Phenylpropanoids and polyketides	Linear 1,3-diarylpropanoids	136666.53	64360.7	98582.56	88377.51	47453.75	91752.32	7352.03	6426.27	8291.33	5835.93	12546.09	7116.23
MW0158342	Tylactone;Protylonolide	C23H38O5	395.2765	394.2719	0.6443	7.2644	74758-60-4	--	C12000	--	10250053	Phenylpropanoids and polyketides	Macrolides and analogues	151.24	673.14	1722.69	1437.95	1459.18	1000.52	3395.71	4173.56	3784.4	5041.99	5471.39	4144.41
MW0007531	Luminespib	C26H31N3O5	532.1795	465.2264	0.6414	2.8747	747412-49-3	--	D10646	--	135539077	Benzenoids	Benzene and substituted derivatives	3094.59	2574.82	2220.85	3849.57	3281.69	3219.95	4880.92	4030.8	3631.5	3480.55	5007.99	5316.77
MW0118854	2-Propyl-4-quinolinecarbohydrazide	C13H15N3O	274.0929	229.1215	0.6465	1.8853	7466-63-9	--	--	--	345257	Organoheterocyclic compounds	Quinolines and derivatives	1004.85	1250.97	2506.14	2893.02	1812.2	1481.43	510.7	315.64	141.38	318.08	1016.86	1168.17
MW0113778	6'-Sialyllactose	C23H39NO19	748.086	633.2116	0.6223	3.1266	74609-39-5	HMDB0006569	--	--	23679057	Organic oxygen compounds	Organooxygen compounds	1310.0	1773.64	1706.44	1384.99	1738.08	1648.49	3713.91	3502.63	3122.02	3689.3	4449.53	3949.79
MW0008011	N-(2-Chlorophenyl)-4-fluorobenzenesulfonamide	C12H9ClFNO2S	267.9994	285.0027	0.6452	0.2602	7454-61-7	--	--	--	341408	Benzenoids	Benzene and substituted derivatives	16493.57	18776.49	17070.84	22476.41	13479.23	23443.86	17372.78	29130.58	22816.59	22095.57	15585.24	12655.58
MW0147830	Cristacarpin	C21H22O5	469.0212	354.1467	0.6159	0.5547	74515-47-2	HMDB0034025	C10206	--	126540	Phenylpropanoids and polyketides	Isoflavonoids	214143.11	198984.76	220507.3	224474.92	217680.5	208367.0	197379.9	188616.01	195436.01	176889.24	206113.85	188024.96
MW0107062	Gly Gly His	C10H15N5O4	287.1491	269.1124	0.5515	3.1825	7451-76-5	--	--	16121	6992501	--	--	28871.17	62948.05	99877.7	36042.57	71469.37	65342.15	50519.84	47215.23	64063.62	51843.3	26232.53	46344.62
MW0062234	Prostaglandin E1	C20H34O5	377.2204	354.2406	0.7103	7.603	745-65-3	HMDB0001442	C04741	--	5280723	Lipids and lipid-like molecules	Fatty Acyls	1109.48	2632.51	2124.45	4457.21	5598.09	2263.7	810.11	990.23	210.7	2954.5	343.34	339.7
MW0061346	PGF1α [9α,11α,15S-trihydroxy-prost-13E-en-1-oic acid]	C20H36O5	357.2644	356.2563	0.9043	9.1022	745-62-0	HMDB0002685	C06475	--	5280939	Lipids and lipid-like molecules	Fatty Acyls	1649467.03	1862023.03	1962643.76	1300711.34	1685062.17	1738466.76	1540110.77	1453620.45	1317723.43	1984562.21	1954986.41	1549567.29
MW0014351	4,4-Dimethylcholest-8(9),24-dien-3β-ol	C29H48O	477.3972	412.3705	0.7235	9.0286	7448-02-4	--	--	--	165609	Lipids and lipid-like molecules	Prenol lipids	2690.59	3418.84	4582.09	2374.86	3345.56	3046.8	1578.74	1323.93	1715.7	1284.22	1543.31	1748.29
MW0168207	Plutonium	Pu	305.0029	238.0496	0.6478	0.5548	7440-07-5	--	C19159	--	23940	Homogeneous metal compounds	Homogeneous actinide compounds	3981.46	2507.77	2143.36	542.98	1583.6	3527.89	1454.7	2293.61	1710.3	1756.41	2171.05	977.71
MW0113053	4-Hydroperoxy-2-nonenal	C9H16O3	190.1439	172.1099	0.69	4.582	7439-43-2	HMDB0060287	--	--	6435432	Organic oxygen compounds	Organooxygen compounds	5834.72	6642.14	7008.07	6570.11	7077.54	7511.11	10429.12	10503.44	10905.15	12922.93	12392.1	10638.01
MW0012921	1-Octadecyl-2-acetyl-sn-glycero-3-phosphocholine	C28H58NO7P	534.3992	551.3951	0.5383	8.9244	74389-69-8	--	--	43410	2733535	Lipids and lipid-like molecules	Glycerophospholipids	4447.66	17214.1	22420.02	4195.06	10656.25	15155.87	3673.92	3875.61	3592.99	2916.27	3071.2	3875.69
MEDP0537	LPC(O-16:0/2:0)	C26H54NO7P	524.3707	523.3638	0.8404	9.8684	74389-68-7	HMDB0062195	-	--	--	GP	LPC	49257.89	81172.64	60463.64	63902.42	80664.44	70067.17	54506.01	53026.1	46523.3	62899.84	74764.44	59223.97
MW0103151	Xanthotoxol geranyl ether	C21H22O4	699.3028	338.1518	0.662	3.3184	7437-55-0	HMDB0039309	--	--	5317564	Lipids and lipid-like molecules	Prenol lipids	15966.64	24060.32	52060.21	19984.55	30047.76	24655.21	3568.23	19699.72	17007.81	20802.13	29766.11	21560.13
MW0147300	Cefotetan disodium;Cefotetan sodium	C17H15N7O8S4.2Na	619.9739	618.966	0.9254	1.2814	74356-00-6	--	C14007	--	53024	Organic acids and derivatives	Carboxylic acids and derivatives	14797.88	25244.82	21006.98	19261.69	14959.69	20308.65	24636.75	27147.25	21264.94	22251.98	18272.82	18289.5
MW0001420	1-[(3-Fluorophenyl)sulfonyl]piperazine	C10H13FN2O2S	300.0549	244.0682	0.7391	4.8648	743441-88-5	--	--	--	2106912	Benzenoids	Benzene and substituted derivatives	9015.97	8931.83	7956.2	9488.42	9358.43	8870.89	7030.63	6852.26	7745.81	10150.68	4639.33	6445.33
MW0139667	Schizandrin	C24H32O7	433.2169	432.2148	0.6583	6.9393	7432-28-2	--	C17064	--	23915	Phenylpropanoids and polyketides	Tannins	13333.32	15953.45	19520.87	12217.46	15942.13	18477.63	12386.59	13520.76	13266.36	13661.96	15105.11	13854.56
MW0011917	1,2-Dipalmitoyl-sn-glycero-3-phospho-(1'-rac-glycerol)	C38H75O10P	764.5417	722.5098	0.5742	4.9684	74313-95-4	--	--	--	11846227	Lipids and lipid-like molecules	Glycerophospholipids	3358.98	2893.61	3019.37	2410.33	2650.97	3086.95	2635.0	3615.67	2919.01	3789.81	3791.13	3393.55
MW0102977	Triptophenolide	C20H24O3	647.3338	312.1725	0.5352	3.5935	74285-86-2	--	--	44381	173273	Lipids and lipid-like molecules	Steroids and steroid derivatives	12357.58	18615.4	19713.01	19810.88	19458.6	19921.52	17866.31	21128.55	20820.37	24557.25	22447.08	16620.61
MW0144273	Acetylintermedine	C17H27NO6	700.4003	341.1838	0.5978	6.0512	74243-01-9	--	C16750	--	3035235	Alkaloids and derivatives	--	9645.07	8057.9	7314.71	8632.68	7694.51	7415.19	8309.68	8663.76	8042.38	9906.19	9324.88	8959.33
MW0152664	L-Histidine beta-naphthylamide	C16H16N4O	322.1698	280.1324	0.5633	7.2027	7424-15-9	--	--	44316	688489	Organic acids and derivatives	Carboxylic acids and derivatives	2707.84	2078.88	1745.73	3123.12	2280.87	1865.72	3487.44	4057.36	3640.44	4429.09	3304.59	3764.44
MEDN1145	P-chlorophenylalanine	C9H10ClNO2	200.0474	199.04	0.7877	2.3748	7424-00-2	-	-	--	4652	Benzene and substituted derivatives	Phenolic acids	82623.33	85705.45	83291.99	82650.63	84979.68	83981.53	80504.86	80465.97	80998.39	83573.77	79854.04	83371.87
MW0009814	Sulfometuron methyl	C15H16N4O5S	387.0734	364.0841	0.6449	7.9844	74222-97-2	--	C10955	--	52997	Benzenoids	Benzene and substituted derivatives	6685.21	6351.44	8788.95	3003.65	4203.73	7359.42	3092.07	3162.78	3205.6	3663.1	4032.66	2420.88
MW0158818	Uplandicine;7-Acetyl-9-echimidinylretronecine	C17H27NO7	753.3209	357.1788	0.6455	6.0512	74202-10-1	--	C10412	--	156778	Alkaloids and derivatives	--	1620.24	1477.2	1223.47	1254.65	1353.84	1008.17	1032.25	1170.73	393.86	739.08	1388.94	1013.56
MW0105267	4-Oxatetradecanoic acid	C13H26O3	195.1742	230.1882	0.8907	0.2542	7420-16-8	--	--	43400	1754	Organic acids and derivatives	Carboxylic acids and derivatives	22869.6	23449.68	24180.51	39426.53	51227.92	52775.82	58832.46	62917.12	45643.15	49553.92	55790.82	56032.11
MW0124713	Lovastatin	C24H36O5	427.2431	404.2563	0.7048	9.3813	74133-25-8	HMDB0014372	C07074	1036	53232	Organoheterocyclic compounds	Lactones	5588.21	7233.29	9651.06	4084.08	6528.19	7016.92	5085.02	5640.95	5612.19	6208.16	6870.64	5825.08
MW0010395	Ethylene	C2H4	57.07	28.0313	0.5847	11.7405	74-85-1	HMDB0029594	C06547	--	6325	Hydrocarbons	Unsaturated hydrocarbons	29792.38	26431.66	24714.68	19082.08	12540.39	29237.67	30774.04	31013.15	1780.9	27336.31	30515.6	29995.97
MEDL00586	L-Arginine	C6H14N4O2	175.1188	174.1117	0.8632	0.6892	74-79-3	HMDB0000517	C00062	--	6322	Amino acids and derivatives	Amino acids and derivatives	305945.32	242982.49	271617.88	417783.12	318968.29	260325.1	363974.81	364980.04	380863.15	381623.04	409175.67	351994.79
MW0150722	Hederoside F	C42H68O14	863.4147	796.4609	0.6334	6.4919	73907-85-4	--	--	--	133562302	--	--	1708.42	1643.93	1804.98	1543.95	888.08	560.33	1911.47	1430.62	1746.17	1485.4	674.67	1267.48
MW0110229	Tyr Tyr Tyr	C27H29N3O7	508.2079	507.2006	0.6483	2.7767	7390-78-5	--	--	16919	14717800	--	--	40530.76	41638.17	52713.73	57081.52	53347.93	54285.6	62720.67	59678.54	59917.89	50896.1	63686.89	68640.85
MW0126887	Trimipramine	C20H26N2	267.2142	294.2096	0.5314	5.9016	739-71-9	HMDB0014864	D00394	2964	5584	Organoheterocyclic compounds	Benzazepines	4046.25	2689.76	4060.58	5486.73	5310.37	2313.8	5504.58	5990.69	6299.77	6144.81	7484.66	6510.57
MW0141024	1-(4-Hydroxy-3-methoxyphenyl)-2-(2-methoxyphenoxy)propane-1,3-diol	C17H20O6	663.2414	320.126	0.8954	0.6291	7382-59-4	--	C21422	--	6424189	Lignans, neolignans and related compounds	--	7285.13	7610.89	9212.62	8468.27	3615.75	6922.02	12531.95	11386.9	9859.7	8803.69	12247.22	13453.34
MW0001478	1-{3-[(2-Oxo-1-azepanyl)carbonyl]benzoyl}-2-azepanone	C20H24N2O4	735.3365	356.1736	0.6489	3.5659	7381-13-7	--	--	--	81857	Benzenoids	Benzene and substituted derivatives	5021.07	4883.6	4802.61	7018.62	8302.96	5447.06	10379.9	9474.81	7643.17	9533.17	12698.2	7717.98
MW0012356	14(15)-Epoxy-5Z,8Z,11Z-eicosatrienoic acid, methyl ester	C21H34O3	335.2578	334.2508	0.6569	7.6457	73804-67-8	--	--	62934	11002157	Lipids and lipid-like molecules	Fatty Acyls	47044.1	22984.8	21459.1	40878.06	29501.0	33457.04	49882.18	53824.98	58058.25	48915.11	62675.88	56086.19
MW0012153	11S-Hydroxy-5Z,8Z,12E,14Z-eicosatetraenoic acid	C20H32O3	680.4414	320.2351	0.892	7.3629999999999995	73804-65-6	--	--	3838	14123410	Lipids and lipid-like molecules	Fatty Acyls	38257.98	68252.15	83846.39	28249.62	63598.49	69972.19	33091.97	36341.58	29844.54	41591.87	54449.95	36303.43
MW0157212	Sterculic acid	C19H34O2	259.242	294.2559	0.6494	0.2645	738-87-4	--	C08366	--	12921	Lipids and lipid-like molecules	Fatty Acyls	8806.67	10144.08	9044.83	9360.6	10749.43	8420.58	8988.34	9034.64	8612.07	10000.1	9214.39	9873.87
MW0120628	4-Methylpiperidine-1-carboximidamide	C7H15N3	106.11200000000001	141.1266	0.5929	0.7195	73771-19-4	--	--	--	3056395	Organoheterocyclic compounds	Piperidines	2464.04	4184.96	3744.81	2572.48	509.58	2494.38	321.75	2655.89	1062.0	768.71	2587.47	2083.09
MW0108438	N-(4-Aminobenzoyl)-β-alanine	C10H12N2O3	209.0923	208.0848	0.5769	1.8965	7377-08-4	HMDB0060757	--	--	719629	Organic acids and derivatives	Carboxylic acids and derivatives	2595.22	2655.96	3390.69	3152.24	2962.34	3526.0	2129.12	2244.41	2482.9	3932.33	3293.41	2014.06
MW0125954	O-Desmethylastemizole	C27H29FN4O	445.2401	444.2325	0.6321	6.4952	73736-50-2	HMDB0061013	--	--	155805	Organoheterocyclic compounds	Benzimidazoles	2345.6	782.86	3696.87	3584.68	3647.99	3370.07	3468.19	3718.09	3094.93	4225.7	3780.35	4706.73
MW0153998	Mycinamicin IV	C37H61NO11	718.4214	695.4245	0.7187	4.2849	73684-71-6	--	C18846	--	6447311	Organic oxygen compounds	Organooxygen compounds	134784.51	248643.07	232624.39	186913.13	287491.81	241580.89	363941.92	327789.12	383778.87	346725.4	459090.9	359585.28
MW0153996	Mycinamicin II;Mirosamicin	C37H61NO13	769.4482	727.4143	0.6472	8.0425	73684-69-2	--	C15680	--	6436150	Organic oxygen compounds	Organooxygen compounds	2302.7	1695.48	1122.91	1014.28	612.69	735.92	597.46	696.55	59.75	1373.97	367.67	1083.25
MW0004758	4-Bromoguaiacol	C7H7BrO2	202.9698	201.9629	0.6117	0.67	7368-78-7	--	--	--	262234	Benzenoids	Phenols	1671.86	2676.61	2256.44	1380.3	1332.55	2060.42	459.06	241.64	163.13	452.2	672.07	364.34
MW0159460	Ziziphin	C51H80O18	963.53	980.5345	0.6113	3.2723	73667-51-3	HMDB0035750	C08991	--	441957	Lipids and lipid-like molecules	Prenol lipids	3501.57	1057.52	2412.43	1616.98	353.01	1832.98	1976.19	2144.14	867.3	2479.92	3057.04	2192.07
MW0107196	Gly-Ser	C5H10N2O4	127.0494	162.0641	0.5914	1.9594	7361-43-5	--	--	--	73086	--	--	2821.13	2738.07	2279.6	2555.77	966.88	2588.38	1747.3	1473.51	1745.35	1294.94	1671.11	2078.1
MW0150559	Glyceryl tri(2-ethylhexanoate)	C27H50O6	471.3669	470.3607	0.7141	10.964	7360-38-5	--	C20355	--	110973	Lipids and lipid-like molecules	Glycerolipids	1451.46	3144.29	5991.06	225.17	3461.92	4310.62	2220.43	711.12	1475.58	3486.5	4031.67	3605.82
MEDN1144	9(S)-HODE	C18H32O3	343.24800000000005	296.2351	0.5397	5.3369	73543-67-6	-	C14767	--	5312830	Oxidized lipids	Oxidized lipids	10582.64	4603.33	5458.5	8735.74	11153.62	1844.14	11111.12	10545.63	10459.27	13435.3	13298.89	11517.49
MW0103454	Adenosine 5-O-(3-thiodiphophate)	C10H15N5O9P2S	426.0085	443.0066	0.5014	0.9117	73536-95-5	--	C13743	34523	5310996	Nucleosides, nucleotides, and analogues	Purine nucleotides	38063.94	42624.62	40182.56	50449.56	48709.89	47316.2	61971.41	69682.61	79521.96	73126.31	77916.61	65185.91
MW0151897	Istamycin X0;Sannamycin G	C14H30N4O4	403.1863	318.2267	0.6068	5.1222	73522-72-2	--	C17986	--	13019103	Organic oxygen compounds	Organooxygen compounds	592.39	1033.19	837.17	5859.86	5908.16	731.94	300.24	170.7	369.62	4547.44	494.97	361.32
MW0139809	Tetrangomycin	C19H14O5	645.1759	322.0841	0.6318	1.9011	7351-08-8	--	C12396	--	160887	Phenylpropanoids and polyketides	Angucyclines	444.39	254.87	321.64	1674.09	319.93	504.0	2479.12	2140.5	2011.4	2862.26	2892.78	2570.23
MW0143654	5-Methylangelicin	C12H8O3	245.0184	200.0473	0.8809	0.5653	73459-03-7	--	C19444	--	62267	Phenylpropanoids and polyketides	Coumarins and derivatives	60456.05	58226.79	62458.13	59142.92	54681.79	53227.26	51436.36	48581.16	50680.6	44651.86	56390.48	49252.06
MW0055208	N-(Eicosanoyl)sphingosine	C38H75NO3	660.5288	593.5747	0.6113	0.5544	7344-02-7	--	--	83707	5283566	Lipids and lipid-like molecules	Sphingolipids	3932.06	2939.45	1607.12	4045.84	2877.46	3582.67	3006.27	3155.38	3577.22	2954.36	2702.45	3083.94
MW0153387	Manniflavanone	C30H22O13	591.1202	590.106	0.5505	1.7842	73428-17-8	--	C09763	--	198549	Phenylpropanoids and polyketides	Flavonoids	20140.57	19520.23	19592.51	18171.62	17624.21	16600.63	10118.85	10036.32	12500.0	12088.6	11107.55	8056.06
MW0125296	N-(1H-Indazol-5-yl)-2-(6-methyl-2-pyridinyl)-4-quinazolinamine	C21H16N6	705.2945	352.1436	0.6477	3.6593	733807-13-1	--	--	--	9998128	Organoheterocyclic compounds	Diazines	4693.87	5065.77	4373.86	2939.49	2797.92	4023.83	1086.1	2367.37	1173.65	1456.3	1735.49	1683.72
MW0109562	S-(p-Azidophenacyl)glutathione	C18H22N6O7S	449.1238	466.1271	0.6499	7.779	73322-71-1	--	C11315	--	443120	Organic acids and derivatives	Carboxylic acids and derivatives	1635.97	1910.67	1954.32	1876.08	2399.3	1693.63	1181.62	2151.8	1953.99	1258.99	1520.42	2155.44
MW0002606	2-{4-[Benzyl(ethyl)amino]benzylidene}malononitrile	C19H17N3	270.139	287.1422	0.6494	3.6477	73268-91-4	--	--	--	17545865	Benzenoids	Benzene and substituted derivatives	3091.2	2056.6	1776.69	5083.01	3643.87	4843.94	4346.86	4980.15	2269.51	4462.92	5166.16	2907.05
MW0148632	DL-PDMP(hydrochloride)	C23H38N2O3	429.2434	390.2882	0.7601	3.6067	73257-80-4	--	--	43407	16760605	Organic nitrogen compounds	Organonitrogen compounds	21847.07	24792.2	22561.97	21615.32	25360.66	24317.8	24056.95	27410.24	24762.6	26690.73	26745.93	26464.57
MEDL00680	CMPentylF	C12H20N4OS	310.1694	268.1358	0.639	0.6288	73248-95-0	-	C19107	--	194501	Organic acid And Its derivatives	Organicacid and Its derivatives	1743.12	3887.35	4670.94	1986.12	3355.35	3251.58	4460.58	3685.9	3952.44	3425.36	3753.49	3483.2
MW0147720	Coenzyme F430;Factor F430	C42H51N6NiO13	952.3003	905.2868	0.6281	11.3846	73145-13-8	--	C05777	--	24892763	Organoheterocyclic compounds	Tetrapyrroles and derivatives	9496.85	10712.16	24760.23	18674.57	9777.44	11008.19	14669.92	39472.82	1276.89	21448.78	30110.01	22840.85
MW0156474	S,S-Dimethyl-beta-propiothetin;S-Dimethylsulfonium propionic acid;Dimethylpropiothetin;DMPT;DMSP	C5H10O2S	152.0704	134.0402	0.6468	2.575	7314-30-9	--	C04022	--	23736	Organic acids and derivatives	Carboxylic acids and derivatives	7573.6	8382.49	7300.19	8757.54	9589.76	8143.16	4777.17	6488.2	6931.1	5283.21	6821.22	6406.25
MW0123530	Deisopropylhydroxyatrazine	C5H9N5O	311.1682	155.0807	0.6113	2.5991	7313-54-4	--	C06557	--	135398734	Organoheterocyclic compounds	Triazines	8390.87	14235.03	13893.47	8187.86	12860.99	14258.37	9581.97	8159.32	8461.92	9792.7	10471.63	9411.65
MW0139059	N-(2-Chlorophenyl)-3-phenyl-2-propenamide	C15H12ClNO	591.0287	257.0607	0.7058	0.5539	73108-79-9	--	--	--	765318	Phenylpropanoids and polyketides	Cinnamic acids and derivatives	1491.46	1403.62	1608.01	2745.58	947.78	2047.0	2489.13	2560.55	601.7	1305.95	2264.0	2452.15
ZINC13119573	CID 25717254	C24H26O7	503.3841	426.465	0.6481	10.134	73069-28-0	-	-	--	25717254	Phenylpropanoids and polyketides	Coumarins and derivatives	9353.0	20664.97	37086.12	5149.1	17995.94	19986.41	4631.46	5540.78	5239.53	5285.87	5415.14	4977.44
MW0138118	Ethyl 6-amino-5-cyano-4-(4-methylphenyl)-2-phenyl-4H-pyran-3-carboxylate	C22H20N2O3	424.1633	360.1474	0.6382	7.9843	73035-27-5	--	--	--	335078	Phenylpropanoids and polyketides	Cinnamic acids and derivatives	3419.62	3326.75	3013.95	3308.03	3144.15	2830.77	3498.81	3291.73	3718.34	3526.42	3559.89	3023.36
MW0120697	4-Pyrimidinamine, N-cyclohexyl-2-(3,5-dimethyl-1H-pyrazol-1-yl)-6-methyl-	C16H23N5	250.1825	285.1953	0.5732	3.8667	73029-73-9	--	--	--	909822	Organoheterocyclic compounds	Diazines	3469.82	5010.95	3717.4	218.65	7592.23	6747.51	1708.54	1466.16	1422.51	670.54	586.66	1465.03
MW0008686	N-[3-(Diethylamino)propyl]-N'-phenylthiourea	C14H23N3S	248.1585	265.1613	0.6076	4.7913	730-19-8	--	--	--	2143457	Benzenoids	Benzene and substituted derivatives	1179.34	1585.09	1168.63	1490.46	1365.11	990.84	1426.25	1811.96	1935.44	1685.67	1497.38	1370.93
MW0120213	4-Amino-5-hydroxymethyl-2-methylpyrimidine	C6H9N3O	317.1124	139.0746	0.6498	4.761	73-67-6	--	C01279	--	777	Organoheterocyclic compounds	Diazines	1353.96	2868.46	1330.69	3140.25	2607.21	2326.63	2604.59	2246.83	580.13	2763.18	3275.42	2216.7
MW0123030	Bendroflumethiazide	C17H18F3N3O2S2	440.0715	417.0793	0.5503	0.5369	73-48-3	HMDB0014580	C07758	1260	2315	Organoheterocyclic compounds	Thiadiazines	1653.03	2224.2	1335.54	1582.14	2802.17	1814.33	2513.69	1527.1	1694.02	2079.43	1726.57	2978.19
MEDN0455	Guanine	C5H5N5O	152.0566	151.049	0.8416	1.8856	73-40-5	HMDB0000132	C00242	--	135398634	Nucleotide And Its metabolomics	Nucleotide and Its metabolomics	10036.27	20333.12	5919.55	21372.22	25378.46	25093.36	80497.98	44542.53	42267.42	80978.73	55653.06	49435.7
MEDL00575	L-Isoleucine	C6H13NO2	132.1016	131.0946	0.635	0.9387	73-32-5	HMDB0033923	C00407	--	6306	Amino acids and derivatives	Amino acids and derivatives	16640.68	13105.38	17437.47	17006.56	15387.39	17345.3	14647.72	17811.79	15672.64	18591.83	20629.27	17018.23
MEDN0208	Melatonin	C13H16N2O2	215.1186	232.1212	0.8069	2.6766	73-31-4	HMDB01389	C01598	--	896	Hormones and hormone related compunds	Hormones and hormone related compunds	19370.69	10416.45	9332.15	25646.97	3518.42	9241.39	8267.23	8626.61	9313.01	8049.12	9665.6	7074.16
MEDN0151	Adenine	C5H5N5	136.0621	135.055	0.8436	1.1589	73-24-5	HMDB0000034	C00147	--	190	Nucleotide And Its metabolomics	Nucleotide and Its metabolomics	2860890.05	1927155.81	2273816.28	1321942.65	1280345.73	2443622.96	289395.43	297247.39	312591.18	316218.05	404062.67	303690.83
MEDP0025	L-Tryptophan	C11H12N2O2	227.0795	204.0899	0.917	2.3116	73-22-3	HMDB0000929	C00078	--	6305	Amino acid and Its metabolomics	Amino acids	2797.31	1202.94	2763.27	52.61	133.27	1818.05	436.84	27.47	10.46	496.01	570.19	397.3
MW0139445	Psoromic acid	C18H14O8	376.1032	358.0689	0.6032	2.7128	7299-11-8	--	--	43642	23725	Phenylpropanoids and polyketides	Depsides and depsidones	535.62	697.98	951.27	1551.06	728.34	579.48	2943.38	2583.43	2293.12	1361.52	2842.89	2936.53
MW0144055	8-Epiiridotrial glucoside;Boschnaloside	C16H24O8	362.181	344.1471	0.6472	3.1495	72963-55-4	--	C11652	--	155942	Lipids and lipid-like molecules	Prenol lipids	1404.39	1287.82	1013.85	3299.84	3398.27	1124.24	2998.26	2735.95	3057.75	2624.73	3539.02	2654.48
MW0168216	Brassinolide	C28H48O6	481.352	480.3451	0.5842	10.5333	72962-43-7	HMDB34081	C08814	--	115196	Lipids and lipid-like molecules	Steroids and steroid derivatives	6094.05	9858.82	12338.19	4507.49	8931.33	9082.29	4120.11	3496.58	4738.03	5310.81	5097.98	4809.59
MW0123240	Carvedilol	C24H26N2O4	429.1782	406.1893	0.6052	6.6726	72956-09-3	HMDB0015267	C06875	1558	2585	Organoheterocyclic compounds	Indoles and derivatives	32203.47	42155.23	40543.31	29599.35	38915.02	39067.65	29014.93	27822.13	34936.6	36848.98	44257.98	31014.83
MW0110469	Vinyl-L-NIO	C9H17N3O2	200.1396	199.1321	0.583	2.9989999999999997	728944-69-2	--	--	62972	71433867	--	--	6827.78	6476.48	6176.77	6026.2	5524.12	6486.67	9776.36	9967.41	11574.2	10412.22	9034.81	8456.94
MW0119729	3-Oxo-2-[3-(trifluoromethyl)phenyl]-2,3-dihydro-1H-isoindole-4-carboxylic acid	C16H10F3NO3	397.9793	321.0613	0.5676	0.5246	728887-93-2	--	--	--	1419098	Organoheterocyclic compounds	Isoindoles and derivatives	2184.81	2220.69	2441.7	1748.69	3363.1	2956.66	2540.64	2104.8	2222.13	3084.62	1927.02	1373.71
MW0119473	3-Bromo-6-ethyl-5-methyl[1,2]thiazolo[5,4-b]pyridine	C9H9BrN2S	319.9828	255.967	0.6489	1.3395	728885-92-5	--	--	--	5299543	Organoheterocyclic compounds	Pyridines and derivatives	1437.27	4209.32	4550.49	3349.34	5125.92	3072.35	3797.45	3578.43	3653.53	2844.44	3212.26	2818.97
MW0112337	3(S)-hydroxy-all-cis-8,11,14,17-eicosatetraenoyl-CoA	C6H12O6	145.0494	180.0634	0.6417	3.1772	7283-09-2	HMDB0062202	--	--	448388	Organic oxygen compounds	Organooxygen compounds	4318.5	9482.32	8448.52	4864.78	10297.64	9133.67	3277.88	5348.82	1854.68	4075.4	4727.69	4251.33
MW0126075	Pergolide sulfone	C19H26N2O2S	715.3322	346.1715	0.6472	3.8375	72822-03-8	--	--	--	9997765	Organoheterocyclic compounds	Quinolines and derivatives	402.94	1172.48	3062.9	280.46	410.26	1139.57	2595.84	3262.41	1591.2	2168.08	4548.38	3430.24
MW0126076	Pergolide sulfoxide	C19H26N2OS	678.3857	330.1766	0.5888	2.6103	72822-01-6	--	--	--	10381998	Organoheterocyclic compounds	Quinolines and derivatives	1450.52	425.91	3719.17	848.58	58.47	1031.61	564.99	556.11	1338.29	4492.85	870.96	859.77
MW0103691	UDP-N-acetyl-alpha-D-galactosamine	C17H27N3O17P2	446.027	607.0816	0.6894	1.2244	7277-98-7	HMDB0060522	--	--	23700	Nucleosides, nucleotides, and analogues	Pyrimidine nucleotides	11672.62	12414.4	13525.03	9695.94	11992.11	13675.27	3059.6	4007.28	4740.57	1906.56	3428.01	3363.18
MW0118374	2-Chloro-1-{1-[4-(difluoromethoxy)phenyl]-2,5-dimethyl-1H-pyrrol-3-yl}propan-1-one	C16H16ClF2NO2	672.2013	327.0838	0.6416	4.1061	727696-15-3	--	--	--	3478467	Organoheterocyclic compounds	Pyrroles	4724.23	6435.49	5450.6	5073.82	4919.6	4090.33	2277.43	2284.12	516.34	2549.55	3044.64	3084.51
MW0048970	Coenzyme Q1	C14H18O4	251.1257	250.1205	0.7759	5.1907	727-81-1	HMDB0002012	--	45118	4462	Lipids and lipid-like molecules	Prenol lipids	292975.13	306914.78	288200.05	294736.73	291798.53	307450.22	283726.64	328316.39	297589.94	276209.92	362002.44	307880.76
MW0104327	2-(3,4-Dimethoxyphenyl)-1,3-thiazolidine-4-carboxylic acid	C12H15NO4S	333.0881	269.0722	0.642	0.6288	72678-92-3	--	--	--	327596	Organic acids and derivatives	Carboxylic acids and derivatives	1855.06	2046.0	1895.21	1347.1	249.5	1185.57	1016.23	1453.62	359.01	892.62	723.33	339.42
MW0144272	Acetylgitaloxin;alpha-Acetylgitaloxin	C44H66O16	889.3986	850.4351	0.8877	8.1896	7263-26-5	--	C16749	--	46173821	Lipids and lipid-like molecules	Steroids and steroid derivatives	2165.78	2780.13	3741.74	1120.31	909.98	2674.35	1698.75	1376.52	1662.15	1835.06	1777.31	1008.31
MW0147008	Calebassone;C-Calebassine	C40H48N4O2	655.3461	616.3777	0.755	6.9397	7257-29-6	--	C09085	--	118701510	--	--	6322.53	6533.45	7728.37	4109.39	3595.26	6412.21	2098.93	1888.94	2019.29	1268.2	1459.0	1559.25
MW0144117	9,11-methane-epoxy PGF1	C21H36O4	370.2956	352.2614	0.5507	9.9722	72517-81-8	--	--	45093	53394560	Lipids and lipid-like molecules	Fatty Acyls	13884.43	35370.54	22703.57	14972.68	35113.87	30589.25	13920.9	14778.81	13198.16	14032.3	17540.9	14852.27
MW0139735	Specioside	C24H28O12	547.1307	508.1581	0.5292	0.8716	72514-90-0	--	--	--	11948661	Phenylpropanoids and polyketides	Cinnamic acids and derivatives	1556.97	1257.01	947.35	3086.1	1727.6	2262.93	11047.4	6670.06	3333.57	4854.82	8518.88	7793.54
MW0006052	Aniracetam	C12H13NO3	237.1237	219.0895	0.633	2.8801	72432-10-1	--	C13355	--	2196	Benzenoids	Benzene and substituted derivatives	2393.81	2697.34	1327.15	3002.61	2434.21	1664.81	2424.17	2748.5	2220.68	2625.73	2428.32	2251.76
MW0122619	8-Hydroxy-5-[1-hydroxy-2-(isopropylamino)butyl]-2(1H)-quinolinone	C16H22N2O3	273.1641	290.163	0.5604	5.2625	72332-33-3	HMDB0015453	D08424	44346	4916	Organoheterocyclic compounds	Quinolines and derivatives	16626.62	17013.55	17544.89	16648.34	15801.17	17595.8	16335.96	16725.37	16049.72	14430.71	15901.27	17516.42
MW0009796	Sulfamethoxazole	C10H11N3O3S	276.0416	253.0521	0.6345	0.5978	723-46-6	HMDB0015150	C07315	2546	5329	Benzenoids	Benzene and substituted derivatives	15285.46	7218.86	15826.64	10624.91	11774.53	12009.44	10219.16	3464.5	9891.17	6451.71	12895.57	11621.53
MW0008242	N-(3-Nitrophenyl)decanamide	C16H24N2O3	356.1917	292.1787	0.5732	3.3184	72298-61-4	--	--	64925	5106032	Benzenoids	Benzene and substituted derivatives	109663.64	144568.42	240428.73	121851.65	154836.97	146575.62	122401.99	120719.04	112212.52	123168.78	157505.21	128634.64
MW0147338	Cerbertin	C32H44O11	627.2728	604.2884	0.8474	0.6143	7227-00-1	--	C08857	--	441851	Lipids and lipid-like molecules	Steroids and steroid derivatives	3593.43	4727.47	6145.48	9470.15	5879.2	4812.93	15556.04	14909.83	15490.26	13537.09	17495.73	14485.55
MW0147804	Coryneine	C11H18NO2	431.223	196.1338	0.6493	3.6008	7224-66-0	--	C17486	--	165581	Benzenoids	Phenols	4509.12	4972.43	5924.51	5642.96	5445.06	5270.13	4670.97	4553.34	4822.91	5685.37	4863.03	5476.92
MW0114742	Linustatin	C16H27NO11	432.1446	409.1584	0.5739	3.7769	72229-40-4	--	C08333	66912	119301	Organic oxygen compounds	Organooxygen compounds	12809.82	13638.01	13933.42	15855.05	17641.65	13460.87	12004.61	13092.9	10428.77	11958.42	12693.94	12656.6
MW0007210	Fomesafen	C15H10ClF3N2O6S	898.9689	437.99	0.6334	0.674	72178-02-0	--	C18736	--	51556	Benzenoids	Benzene and substituted derivatives	9502.06	7328.54	7760.84	9232.98	12205.43	9586.39	10254.53	10354.18	9491.88	10983.06	5705.88	8875.51
MW0111653	1-(5-Chloro-2-hydroxyphenyl)-3-(2-furyl)-1,3-propanedione	C13H9ClO4	133.0133	264.0189	0.5198	11.815999999999999	7209-68-9	--	--	--	254790	Organic oxygen compounds	Organooxygen compounds	5880.93	7938.61	4842.53	5391.77	5076.76	8374.22	7306.57	10401.4	7134.3	4667.1	2411.39	5497.02
MW0114103	Clofibric acid acyl-β-D-glucuronide	C16H19ClO9	432.1055	390.0718	0.6481	1.5772	72072-47-0	--	--	--	155696	Organic oxygen compounds	Organooxygen compounds	2187.03	7566.7	3307.06	3191.7	5423.95	3453.12	1137.88	1024.12	2274.15	1846.3	2102.28	2058.83
MW0117188	1-Methyl-1H-pyrazol-5-ylboronic acid	C4H7BN2O2	109.0585	126.0601	0.5222	3.0531	720702-41-0	--	--	--	11182610	Organoheterocyclic compounds	Azoles	5512.09	5097.15	5655.04	5547.54	5077.34	4722.33	5104.41	5061.38	4984.35	5189.3	5108.59	4601.18
MW0131149	3-(3,4-Dimethoxyphenyl)-7-hydroxy-4-phenylcoumarin	C23H18O5	766.2655	374.1154	0.6195	2.9095	720674-20-4	--	--	--	5498512	Phenylpropanoids and polyketides	Neoflavonoids	25982.92	10639.06	17454.63	9003.17	3928.33	17645.26	163.18	21.61	71.1	355.83	674.28	2935.03
MW0115753	(+) Biotinyl-6-aminohexanoic acid	C16H27N3O4S	399.20599999999996	357.1722	0.6465	3.0805	72040-64-3	--	--	--	446905	Organoheterocyclic compounds	Biotin and derivatives	1620.64	808.33	1583.11	1869.68	1777.31	2618.35	4111.64	1582.28	2983.84	2072.16	3199.47	2821.22
MW0011294	(3Z)-2-Propylpent-3-enoic acid	C8H14O2	165.0909	142.0994	0.7139	13.4613	72010-19-6	HMDB0013903	C16654	--	24892812	Lipids and lipid-like molecules	Fatty Acyls	7995.0	8018.73	7584.01	8731.95	7606.97	17114.02	5663.14	7643.07	8003.12	10511.27	7456.69	6313.92
MW0013655	2-Propyl-2,4-pentadienoic acid	C8H12O2	105.0698	140.0837	0.6481	11.7816	72010-18-5	HMDB0060682	C16656	--	6441809	Lipids and lipid-like molecules	Fatty Acyls	130981.37	133144.81	129628.13	150222.91	114970.66	94189.34	121993.42	182356.51	185372.91	222942.5	186588.53	114064.2
MW0009166	Nortriptyline	C19H21N	264.1806	263.1674	0.5211	4.7913	72-69-5	HMDB0014680	C07274	953	4543	Benzenoids	Dibenzocycloheptenes	11340.4	10831.09	9900.23	10002.32	10938.46	10955.5	13339.14	13709.6	12148.85	12148.16	15440.77	14308.89
MW0007644	Methoxychlor	C16H15Cl3O2	689.0358	344.0138	0.6044	0.6595	72-43-5	--	C11043	--	4115	Benzenoids	Benzene and substituted derivatives	3678.44	4724.63	10401.09	8368.74	4155.85	6697.12	5229.63	5720.26	4221.61	3612.48	3879.77	5720.93
MEDP1637	11-Dehydrocorticosterone	C12H28O4	431.1739	392.2927	0.7419	8.1896	72-23-1	HMDB0004029	C05490	--	6290	Hormones and hormone related compunds	Hormones and hormone related compunds	20196.49	20756.97	23549.96	16777.27	19031.37	20566.94	17374.87	15607.67	16433.49	18956.48	18678.83	16379.29
MW0003236	2-Methyl-4-(1,7,7-trimethylbicyclo[2.2.1]hept-2-yl)phenol	C17H24O	291.1957	244.1827	0.6349	7.1286	71965-25-8	--	--	--	4834348	Benzenoids	Benzene and substituted derivatives	3377.92	5081.4	4724.38	8791.67	9993.4	5450.62	2075.26	2424.99	2469.14	8579.99	3069.86	2165.2
MEDL01935	Artemether	C16H26O5	299.1822	298.178	0.6111	4.7467	71963-77-4	HMDB0015643	-	--	68911	Terpenoids	Sesquiterpenoids	4410.76	4090.95	4040.12	8018.7	5474.33	5043.7	4659.35	6233.21	5454.42	5521.33	6128.55	4853.34
MEDN0804	TxB3	C20H32O6	754.4731	368.2199	0.8796	7.7791	71953-80-5	HMDB0005099	-	--	5283140	Oxidized lipids	Oxidized lipids	302346.95	327357.72	474861.74	132616.98	209006.08	355224.71	20605.79	120108.59	118461.42	150493.53	188815.87	128747.49
MW0114715	Leiocarposide	C27H34O16	653.1429	614.1847	0.5322	1.4956	71953-77-0	--	C10805	--	156073	Organic oxygen compounds	Organooxygen compounds	2357.64	2604.5	3168.94	4066.41	3219.43	2812.36	2125.52	2666.04	317.7	2866.93	4562.23	2592.54
MW0007577	Mefruside	C13H19ClN2O5S2	803.0445	382.0424	0.5249	0.5625	7195-27-9	--	D01877	--	4047	Benzenoids	Benzene and substituted derivatives	1878.54	3102.95	1661.93	1395.18	2664.46	1562.2	1186.89	1200.06	727.05	634.65	741.31	1373.62
MEDP1141	2,6-di-tert-butyl-1,4-benzoquinone	C14H20O2	221.1536	220.1463	0.6082	11.8094	719-22-2	HMDB0013817	-	--	12867	Benzene and substituted derivatives	Benzene and substituted derivatives	186678.83	226727.61	233884.37	156430.74	259387.09	212238.99	255131.33	305215.22	164265.03	208446.58	325190.0	136358.02
MW0137527	Borrelidin	C28H43NO6	490.3078	489.309	0.831	10.565999999999999	7184-60-3	--	--	--	6436801	Phenylpropanoids and polyketides	Macrolides and analogues	3626.79	4068.83	4270.51	4647.57	4546.85	4401.14	4909.89	4824.65	4527.9	4174.17	4426.33	4633.36
MW0001616	1-Hydroxy-N-(3-nitrophenyl)-2-naphthamide	C17H12N2O4	309.0828	308.0797	0.732	12.2562	71835-65-9	--	--	--	242249	Benzenoids	Naphthalenes	1302.69	1077.54	1767.02	1054.43	988.53	1419.54	1887.62	1373.34	292.75	1710.28	1224.59	1131.13
MW0138577	Ivermectin B1a	C48H74O14	913.4706	874.5079	0.6336	9.1752	71827-03-7	--	--	879	6321424	Phenylpropanoids and polyketides	Macrolides and analogues	2234.22	2383.21	3113.94	1249.18	2114.59	2428.22	1411.87	1573.27	530.63	1406.15	1345.66	1062.14
MW0012187	12(S)-Hpete	C20H32O4	337.2381	336.2301	0.9828	6.6733	71774-10-2	HMDB0004243	C05965	3845	5280892	Lipids and lipid-like molecules	Fatty Acyls	167289.02	249866.79	279034.79	164066.69	237076.59	251852.57	156032.81	153156.01	149460.99	222224.9	227114.52	178551.04
MW0014839	5S-HpETE	C20H32O4	320.2304	336.2301	0.9707	6.982	71774-08-8	HMDB0001193	C05356	--	5280778	Lipids and lipid-like molecules	Fatty Acyls	3034.02	2854.25	3672.94	1765.59	2610.1	3434.8	3008.15	2092.02	1552.59	4081.33	3761.61	2625.93
MW0115920	(3Z)-6-Hydroxy-3-(1H-imidazol-5-ylmethylidene)-12-methoxy-7a-(2-methylbut-3-en-2-yl)-7a,12-dihydro-1H,5H-imidazo[1',2'	C23H23N5O4	884.3839999999999	433.175	0.6468	4.0347	71751-77-4	--	--	--	6437857	Organoheterocyclic compounds	Indoles and derivatives	12496.64	5340.53	12716.47	6834.14	3499.04	6924.02	1449.16	2902.06	3001.32	1123.25	2521.55	2199.47
MW0148452	Didecyldimethylammonium chloride;N-Decyl-N,N-dimethyl-1-decanaminium chloride	C22H48N.Cl	438.267	361.3475	0.6212	11.2983	7173-51-5	--	C15436	--	23558	Organic nitrogen compounds	Organonitrogen compounds	2289.78	11783.44	3814.67	5699.23	7556.15	3115.98	8434.95	2609.27	10566.73	1785.84	2385.09	906.12
MW0147264	C-Curarine;C-Curarine I	C40H44N4O	635.318	596.3515	0.9795	7.779	7168-64-1	--	C09144	--	5281386	Alkaloids and derivatives	Strychnos alkaloids	9709.47	6921.58	9409.65	4572.75	4532.43	8272.63	2692.81	2048.23	2046.2	2406.0	2816.8	2097.39
MW0103845	(2-Oxo-5-phenyl-1,3,4-oxadiazol-3(2H)-yl)acetic acid	C10H8N2O4	265.0198	220.0484	0.6442	0.2768	71679-70-4	--	--	--	4962067	Organic acids and derivatives	Carboxylic acids and derivatives	7524.2	10536.29	8779.89	7821.63	6906.18	8665.58	7159.4	7593.55	7538.0	9488.62	7776.89	8315.03
ZINC36773880	N,N-Dimethylglycine methyl ester	C5H11NO2	156.1099	117.148	0.5557	4.8358	7148-06-3	-	-	--	81569	Organic acids and derivatives	Carboxylic acids and derivatives	13277.38	13482.81	14553.17	13263.18	14427.61	20643.03	13688.96	13773.4	3811.66	14499.4	14784.61	13558.54
MW0118134	2-[3-(1H-Benzimidazol-2-yl)propyl]-1H-benzimidazole	C17H16N4	116.0704	276.1375	0.6644	1.3628	7147-66-2	--	--	--	242973	Organoheterocyclic compounds	Benzimidazoles	18833.61	18331.03	24415.88	24490.71	19247.31	156071.24	76764.67	140881.87	21770.53	17691.01	150315.22	26299.3
MW0154811	Oxolucidine B;Serratanine B	C30H49N3O2	522.3456	483.3825	0.6423	8.2047	71384-25-3	--	C09891	--	442493	Organoheterocyclic compounds	Quinolidines	36191.5	17437.29	5744.62	40189.28	19072.26	11372.23	10613.79	12638.12	12436.95	12165.28	13401.94	12451.92
MW0127054	δ-Dodecalactone	C12H22O2	199.1692	198.162	0.6033	7.8083	713-95-1	HMDB0037742	--	92565	12844	Organoheterocyclic compounds	Lactones	13490.03	14159.2	12637.31	9826.39	7961.24	31442.7	23142.46	13860.05	17832.71	15138.31	22813.39	21969.69
MW0104938	3-[(3-Carboxycyclohexyl)carbamoyl]-4-[3-[4-(4-cyclohexyloxybutoxy)phenyl]propoxy]benzoic Acid	C34H45NO8	634.2766	595.3145	0.6902	4.9683	712313-35-4	--	--	96432	10438479	Organic acids and derivatives	Carboxylic acids and derivatives	2391.37	3107.91	888.16	2652.06	1971.28	2484.61	2140.39	1380.16	2353.57	965.1	2235.09	2026.48
MW0005980	Alfentanil	C21H32N6O3	439.2475	416.2536	0.6162	3.7209	71195-58-9	HMDB0014940	C08005	--	51263	Benzenoids	Benzene and substituted derivatives	43189.96	43911.17	41797.68	54306.32	50443.82	46274.66	51200.46	48556.46	49917.48	56049.38	53472.04	56870.72
MW0118816	2-Phenyl-1,3-thiazole-4-carboxylic acid	C10H7NO2S	228.0094	205.0197	0.6248	0.5653	7113-10-2	--	--	--	138928	Organoheterocyclic compounds	Azoles	38352.57	36094.38	38466.27	36541.98	38465.53	35139.43	32973.0	29567.87	32277.67	30967.51	35587.44	34977.38
MW0153957	Montanol	C21H36O4	370.2954	352.2614	0.6454	5.1445	71117-50-5	--	C09137	--	11953925	Lipids and lipid-like molecules	Prenol lipids	2089.21	2177.2	2333.91	2449.91	850.44	2200.63	2408.95	2544.83	2287.76	2105.21	2433.91	2531.52
MW0003714	3,5-Dinitrobenzenemethanol	C7H6N2O5	236.9902	198.0277	0.5976	0.3888	71022-43-0	--	--	--	116978	Benzenoids	Benzene and substituted derivatives	15100.96	15718.72	16770.11	15702.55	15107.9	14517.54	13420.87	13538.47	14494.83	13797.5	13306.35	13833.3
MEDL00760	L-DOPA methyl ester	C10H13NO4	194.0811	211.0845	0.8314	2.2289	7101-51-1	-	D07304	--	--	Amino acid and Its metabolomics	Amino acid derivatives	15072.63	9286.17	9239.67	14837.88	10935.58	11380.13	19050.5	17512.56	14059.44	17072.49	19686.3	18468.32
MW0127058	δ-Undecalactone	C11H20O2	149.1323	184.1463	0.7597	4.5379	710-04-3	HMDB0036784	--	--	61204	Organoheterocyclic compounds	Lactones	27731.37	31437.29	27114.92	31231.44	30997.86	28453.45	34096.64	37492.85	33045.31	33177.69	40002.18	36722.13
MEDL00820	Cytosine	C4H5N3O	112.0505	111.0433	0.8255	1.1677	71-30-7	HMDB0000630	C00380	--	597	Nucleotides and derivatives	Nucleotides and derivatives	7341.26	12328.52	6968.73	10299.05	10991.35	7799.81	9130.66	8279.5	9368.15	8386.55	9196.42	7352.54
MW0115172	Propanol	C3H8O	143.1065	60.0575	0.5631	7.5736	71-23-8	HMDB0000820	C05979	--	1031	Organic oxygen compounds	Organooxygen compounds	18417.27	35768.05	38957.22	15532.63	34945.82	36172.9	16865.26	16910.38	15664.95	19587.62	20552.54	17349.27
MEDL02163	15-Hydroperoxyicosatetraenoic acid	C20H32O4	320.2301	336.2301	0.9684	8.0572	70981-96-3	HMDB0004244	C05966	--	5280893	Lipids	Free fatty acids	16883.47	21038.17	26611.71	12172.84	18292.5	21452.33	12013.61	12293.81	11665.99	15195.81	17084.95	12048.1
MW0058131	PE(16:0/20:4(5Z,8Z,11Z,14Z))	C41H74NO8P	722.5047	739.5152	0.6461	9.8231	70812-59-8	HMDB0008937	--	--	9546800	Lipids and lipid-like molecules	Glycerophospholipids	6792.1	425.98	306.56	6327.37	668.03	1470.32	282.28	960.7	869.79	974.91	2964.73	738.22
MW0011796	1-(2,2,6-Trimethylcyclohexyl)hexan-3-ol	C15H30O	227.237	226.2297	0.6459	13.8216	70788-30-6	--	--	--	116699	Lipids and lipid-like molecules	Prenol lipids	4033.52	2366.81	4335.6	3506.57	2019.91	1879.18	4577.32	4489.3	7590.66	1161.95	3085.76	1788.03
MW0120862	5-(4-Pyridinyl)-5-(2-butenyl)-2,7-nonadiene	C18H25N	533.3868	255.1987	0.6411	8.7326	70776-89-5	--	--	--	6437990	Organoheterocyclic compounds	Pyridines and derivatives	3819.37	15997.31	10138.48	5261.08	12368.36	11344.02	3083.18	3030.82	3048.95	3846.2	4515.76	3039.64
MW0151228	Hordatine A	C28H38N8O4	515.2872	550.3016	0.6167	5.9056	7073-64-5	HMDB0030461	C08307	--	45485025	Phenylpropanoids and polyketides	2-arylbenzofuran flavonoids	18729.51	20111.87	23136.73	15550.47	10773.3	21200.86	17276.99	15860.94	11031.63	19213.3	22025.49	20814.83
MW0149164	Fetidine	C40H46N2O8	665.3221	682.3254	0.6491	3.6217	7072-86-8	--	C09441	--	442233	Alkaloids and derivatives	Aporphines	19879.89	23192.61	12014.19	18716.73	18825.83	19566.61	18912.43	20936.01	23383.19	24795.11	22724.55	19588.95
MW0104165	1,1'-(Cyclohexane-1,4-diyl)bis(3,3-diethylurea)	C16H32N4O2	379.20599999999996	312.2525	0.6356	4.5821	70660-59-2	--	--	--	116786	Organic acids and derivatives	Organic carbonic acids and derivatives	1890.7	2412.3	884.35	1313.24	2059.12	898.28	2430.96	2410.05	2574.9	2876.25	1997.27	2287.87
MW0127044	γ-Decalactone	C10H18O2	171.1382	170.1307	0.7582	6.4943	706-14-9	HMDB0037217	--	--	12813	Organoheterocyclic compounds	Lactones	308054.96	323387.31	333151.73	324272.36	340362.41	316954.7	373069.93	366132.28	343231.58	399670.11	417318.77	381337.2
MW0116779	1-[2-Oxo-2-(1-piperidinyl)ethyl]piperazine	C11H21N3O	195.1563	211.1685	0.5743	5.2185	70558-13-3	--	--	--	2760439	Organoheterocyclic compounds	Diazinanes	3397.03	4485.69	4223.22	3465.0	3972.01	4510.38	3599.29	3710.88	4257.99	3772.1	3658.84	4364.23
MW0005648	5-Chlororesorcinol dimethyl ether	C8H9ClO2	383.0216	172.0291	0.6364	0.9253	7051-16-3	--	--	96393	81502	Benzenoids	Benzene and substituted derivatives	1795.59	1977.48	1288.09	1658.86	2759.23	2734.69	3792.56	4734.05	5358.22	3940.6	5786.87	4186.61
MW0127053	δ-Decalactone	C10H18O2	358.2944	170.1307	0.5869	7.1169	705-86-2	HMDB0037116	--	92087	12810	Organoheterocyclic compounds	Lactones	9983.9	7837.36	8128.02	9034.85	7927.09	7110.82	8699.81	11026.64	263.71	8448.56	8493.93	8966.12
MW0107986	Lyngbyatoxin	C27H39N3O2	455.3363	437.3042	0.5141	10.4738	70497-14-2	--	C15720	--	3979	Organic acids and derivatives	Carboxylic acids and derivatives	6933.09	8107.33	10345.77	4960.43	5313.55	7131.73	3987.6	4231.82	4370.79	5285.5	5996.19	4723.32
MW0013112	2,3-dinor Prostaglandin E1	C18H30O5	327.2173	326.2093	0.528	7.3087	7046-40-4	--	--	45460	16061101	Lipids and lipid-like molecules	Fatty Acyls	303270.0	439738.18	547568.48	233715.98	384215.71	462380.66	218934.99	225259.0	218671.64	222884.22	295280.86	212125.43
MW0154956	Pedunculagin	C34H24O22	785.0807	784.0759	0.5759	1.3106	7045-42-3	--	C10236	--	442688	Phenylpropanoids and polyketides	Tannins	1909.87	2528.01	2950.1	1525.89	1511.33	2899.58	3714.37	4047.52	1777.97	4388.77	4877.69	4242.94
MW0013409	2beta-Hydroxygibberellin 1	C19H24O7	767.2673	364.1522	0.6377	2.9095	7044-72-6	--	C03579	--	440051	Lipids and lipid-like molecules	Prenol lipids	7421.62	2357.29	4774.94	1911.73	983.62	4659.77	807.31	55.55	891.61	1014.57	990.07	22.91
MW0107193	Gly-Pro	C7H12N2O3	214.1186	172.0848	0.6489	2.8827	704-15-4	HMDB0000721	--	--	3013625	--	--	3625.84	2727.79	3605.54	3685.79	2817.66	2602.48	2467.09	2686.34	2637.54	2813.75	3262.22	2796.28
MW0130080	2-(2H-Benzotriazol-2-yl)-4,6-bis(1-methyl-1-phenylethyl)phenol	C30H29N3O	524.1477	447.2311	0.5159	3.8158	70321-86-7	--	--	--	112412	Phenylpropanoids and polyketides	Diarylheptanoids	14778.84	8411.02	10807.15	8490.76	7001.47	10751.04	1383.11	2164.0	691.02	2479.32	5225.11	1424.66
ZINC25723700	S-Petasin	C19H26O3S	686.9966	334.481	0.6174	0.5652	70238-51-6	-	-	--	16219858	Lipids and lipid-like molecules	Prenol lipids	4744.64	2740.55	2349.37	3418.74	2516.32	3118.96	975.07	2506.13	2297.49	1659.44	3369.83	343.29
MW0006161	Benzamide, N-[[(2-hydroxy-5-nitrophenyl)amino]thioxomethyl]-3,5-dimethyl-	C16H15N3O4S	346.0817	345.0783	0.542	1.3771	701947-53-7	--	--	96441	4999938	Benzenoids	Benzene and substituted derivatives	1065.78	5695.53	4255.6	3298.24	7268.08	4921.61	8514.54	4963.25	5892.29	2905.25	9904.98	9164.98
MW0052917	Flucythrinate	C26H23F2NO4	474.1555	451.1595	0.5148	3.5988	70124-77-5	--	C14524	--	50980	Lipids and lipid-like molecules	Fatty Acyls	20510.69	22473.88	20045.59	21992.25	24344.26	21838.24	23047.88	24281.95	20537.34	26490.45	23909.13	23888.83
MW0001168	1-(4-Fluorophenyl)-1-propanol	C9H11FO	326.1937	154.0794	0.5691	4.6719	701-47-3	--	--	--	102470	Benzenoids	Benzene and substituted derivatives	958.61	3195.25	1159.31	61.43	174.58	926.55	49.07	65.62	51.09	240.6	146.29	23.76
MW0122157	6-Fluoro-4-oxo-1-propyl-1,4-dihydro-3-quinolinecarboxylic acid	C13H12FNO3	521.1498	249.0801	0.6367	3.7111	70032-17-6	--	--	--	19605881	Organoheterocyclic compounds	Quinolines and derivatives	3613.62	2458.29	3602.36	1048.96	862.24	2249.71	1236.25	1041.49	1130.36	1927.2	1511.07	2385.44
MW0110952	Chlormequat	[C5H13ClN]+	105.0698	122.0731	0.6497	5.2187	7003-89-6	--	C18585	--	13837	Organic nitrogen compounds	Organonitrogen compounds	10710.88	10924.91	7567.65	6203.64	10839.31	10724.68	5921.89	7390.71	3165.63	12790.75	11347.37	8209.43
MW0118540	2-Fluoro-7H-purin-6-amine	C5H4FN5	324.124	153.0451	0.6499	6.4943	700-49-2	--	--	--	12790	Organoheterocyclic compounds	Imidazopyrimidines	1586.59	1237.15	1555.91	1952.27	1597.65	2113.92	2015.5	1677.4	1565.62	1202.17	1766.62	1524.77
MW0009593	P-Toluenesulfonamide	C7H9NO2S	136.0215	171.0354	0.5782	11.1105	70-55-3	--	C14412	--	6269	Benzenoids	Benzene and substituted derivatives	3936.44	5424.14	6482.94	6892.59	3943.03	2898.16	6009.61	5768.88	5742.6	7047.77	8507.99	4746.65
MEDL02023	L-Asparagine Anhydrous	C4H8N2O3	287.0965	132.0535	0.6313	6.4949	70-47-3	HMDB0000168	C00152	--	6267	Amino acids and derivatives	Amino acids and derivatives	2945.85	2679.85	2196.95	1808.72	2494.0	2910.14	2005.21	2305.5	2809.89	2808.13	1963.9	3033.34
MW0103575	Glutathione	C10H17N3O6S	371.0996	307.0838	0.6479	7.9844	70-18-8	HMDB0000125	C00051	--	124886	--	--	5358.48	6008.15	5930.21	3473.12	4653.11	5359.34	3579.47	4466.24	3862.21	4243.25	4780.08	3593.78
MW0112093	2-Bromoacetophenone	C8H7BrO	244.9808	197.968	0.6498	0.5677	70-11-1	--	--	--	6259	Organic oxygen compounds	Organooxygen compounds	10952.44	11571.6	12703.38	8481.3	8875.89	11736.13	6979.68	5574.56	7289.07	6702.35	8462.01	5840.67
MW0156299	Quadrigemine A	C44H50N8	730.4362	690.4158	0.9082	11.4287	69937-02-6	--	C09234	--	172448	Organoheterocyclic compounds	Indoles and derivatives	8032.2	5747.43	2780.62	180.9	7534.83	99.82	5547.57	6116.86	7964.54	125.5	52.05	7326.79
MW0139766	Swertisin	C22H22O10	429.1202	446.1213	0.5749	1.0427	6991-10-2	--	C17835	--	124034	Phenylpropanoids and polyketides	Flavonoids	39175.27	23810.12	45274.79	30967.76	30244.49	38055.23	30931.49	32274.01	31495.33	42659.06	41835.37	35148.62
MW0104482	2-Amino-2,5-dihydro-1,5,2-diazaphosphinin-6(1H)-one 2-oxide	C3H6N3O2P	312.0734	147.0198	0.6453	5.3965	69907-44-4	--	--	--	328852	Organic acids and derivatives	Organic phosphonic acids and derivatives	538.85	1406.27	698.85	2248.23	1911.17	1414.15	2574.76	2295.5	2560.64	1793.2	2541.39	2493.93
MW0009362	Pentylone	C13H17NO3	280.0763	235.1208	0.5685	0.3755	698963-77-8	--	--	85215	60208608	Benzenoids	Benzene and substituted derivatives	2120.28	2959.31	3217.23	1684.39	960.98	1138.96	909.67	2328.37	2841.57	2187.53	2445.52	1677.43
MW0125097	Methyl 5-(chlorosulfonyl)furan-2-carboxylate	C6H5ClO5S	241.989	223.9546	0.6152	0.5687	69816-05-3	--	--	--	2736845	Organoheterocyclic compounds	Furans	119138.41	105059.69	124553.58	93518.68	99134.7	113092.97	67407.39	63297.91	73294.52	67652.22	86250.37	68554.21
MW0009272	Ormetoprim	C14H18N4O2	319.1145	274.143	0.6309	0.6588	6981-18-6	--	D05273	--	23418	Benzenoids	Benzene and substituted derivatives	644.04	1488.4	2436.86	2254.23	1418.23	2282.97	2982.24	1660.91	1156.01	1909.87	2443.18	2402.6
MW0007293	Haloxyfop	C15H11ClF3NO4	475.9082	361.0329	0.6272	0.6587	69806-34-4	--	C04871	--	50895	Benzenoids	Benzene and substituted derivatives	2457.34	3690.74	2529.81	4396.6	4810.19	3576.68	1006.69	1588.31	2460.22	2133.81	105.49	1242.59
MW0149568	Gibberellin A19;Gibberellin 19	C20H26O6	380.2045	362.1729	0.6836	5.5599	6980-44-5	HMDB0036896	C02034	--	5460209	Lipids and lipid-like molecules	Prenol lipids	161.91	412.56	346.99	1199.63	718.75	430.45	3349.45	2350.01	253.74	335.01	4384.25	4842.2
MW0127057	δ-Octalactone	C8H14O2	125.0962	142.0994	0.7884	3.8871	698-76-0	HMDB0038310	--	93034	12777	Organoheterocyclic compounds	Lactones	169015.67	197278.8	199304.72	190995.36	255965.23	186678.29	191714.81	198256.47	177580.62	242958.07	213221.46	251039.38
MW0103535	Didanosine	C10H12N4O3	283.0909	236.0909	0.8023	1.4895	69655-05-6	HMDB0015037	C06953	--	135398739	Nucleosides, nucleotides, and analogues	Purine nucleosides	3895.67	3606.49	4424.28	3951.14	2673.99	3523.19	1324.4	1225.38	307.61	1646.8	1542.57	1374.26
MW0013724	3-(Octylsulfanyl)propanoic acid	C11H22O2S	201.1304	218.1341	0.6241	5.1445	6964-23-4	--	--	--	81416	Lipids and lipid-like molecules	Fatty Acyls	1975.18	2427.73	3961.58	8124.36	11289.55	4421.99	3782.95	3844.25	3227.37	3101.42	5522.94	3692.8
MW0009676	Rhododendrol	C10H14O2	184.1329	166.0994	0.6322	3.8328	69617-84-1	--	C17690	--	97790	Benzenoids	Phenols	964.58	534.45	426.4	2069.55	1881.73	594.69	3803.86	2830.21	3092.06	7292.59	2415.31	4856.09
MW0014744	5-cis Carbaprostacyclin	C21H34O4	397.2591	350.2457	0.6247	8.6287	69609-77-4	--	--	45623	91886111	--	--	456164.33	502619.41	682054.1	297168.61	369941.16	485648.66	255751.93	272161.74	252465.3	277442.1	306125.37	247333.9
MW0123682	Dihydrothymine	C5H8N2O2	129.0688	128.0586	0.7152	12.609000000000002	696-04-8	HMDB0000079	C00906	--	93556	Organoheterocyclic compounds	Diazines	2575.18	2916.53	6194.4	2728.86	2929.95	1954.73	16212.32	5808.57	4031.2	3186.27	4035.06	3600.59
MW0106246	Cyprofuram	C14H14ClNO3	576.1661	279.0662	0.6376	1.4748	69581-33-5	--	C18909	--	50590	Organic acids and derivatives	Carboxylic acids and derivatives	2010.19	2314.58	1950.58	1950.94	1794.52	1878.3	2129.24	1413.98	643.39	1485.66	1222.0	920.21
ZINC3795332	N-Methyldeoxynojirimycin	C7H15NO4	241.2157	177.2	0.6447	13.374	69567-10-8	-	-	--	92381	Organoheterocyclic compounds	Piperidines	4534.54	3556.12	4687.31	3658.24	4403.55	4096.45	6058.75	9969.59	2003.98	3422.0	4548.99	3884.63
MW0141536	17beta-[Bis(2-hydroxyethyl)amino]androst-5-en-3beta-ol	C23H39NO3	777.576	377.293	0.6201	10.0165	6956-93-0	--	C14966	--	250208	Lipids and lipid-like molecules	Steroids and steroid derivatives	15672.59	14418.03	15368.08	17596.16	20309.07	15446.63	22126.33	17610.94	17323.28	16424.47	15748.53	16024.11
MW0117682	2-(Butylthio)-4(1H)-quinazolinone	C12H14N2OS	725.2525	234.0827	0.7307	3.5375	6956-60-1	--	--	--	135443812	Organoheterocyclic compounds	Diazanaphthalenes	2173.54	2682.0	1735.1	2112.42	2493.96	1338.5	2206.06	2321.44	2321.41	2030.59	2826.42	2001.27
MW0012862	1-Myristoyl-2-palmitoyl-sn-glycero-3-phosphocholine	C38H76NO8P	688.5198	705.5309	0.5660000000000001	10.0762	69525-80-0	HMDB0007869	--	--	129657	Lipids and lipid-like molecules	Glycerophospholipids	135246.89	142818.59	141742.17	143389.0	144287.38	128508.35	138746.64	143115.42	139685.12	133449.26	140949.14	145572.99
MW0127047	γ-Hexalactone	C6H10O2	79.0542	114.0681	0.5504	11.8273	695-06-7	HMDB0003843	--	--	12756	Organoheterocyclic compounds	Lactones	216562.11	169413.43	196791.34	165758.16	77263.48	106116.37	140900.34	183930.15	127574.71	113932.27	12834.51	171355.59
MW0015616	Aleuritic acid	C16H32O5	305.2324	304.225	0.7202	4.9092	6949-98-0	--	--	35478	10790	Lipids and lipid-like molecules	Fatty Acyls	21804.87	23023.87	23517.2	21799.51	25148.51	21645.99	19905.87	20719.34	17754.53	22976.41	22569.17	18710.02
MW0141582	17beta-Hydroxy-7alpha-mercaptoandrost-4-en-3-one 7-propionate;S-(17beta-Hydroxy-3-oxoandrost-4-en-7alpha-yl)propanethioate	C22H32O3S	377.2175	376.2072	0.7024	4.1832	6947-46-2	--	C14973	--	245238	Lipids and lipid-like molecules	Steroids and steroid derivatives	7761.63	10282.35	13639.86	5718.46	7513.7	11189.12	10404.21	9105.77	14461.78	2488.04	9912.78	9518.95
MEDN0798	PGK1	C20H32O5	353.2326	352.225	0.5786	9.2937	69413-73-6	-	-	--	16061102	Oxidized lipids	Oxidized lipids	102203.02	344486.95	181853.38	124324.83	232727.81	229556.74	93024.16	88893.72	83498.47	103096.99	126665.14	98442.98
MW0005280	4-Nitro-N-(2-pyrimidinyl)benzamide	C11H8N4O3	289.0309	244.0596	0.6489	0.5451	6941-88-4	--	--	--	235802	Benzenoids	Benzene and substituted derivatives	4354.44	7069.15	10565.49	4655.43	9070.2	7404.49	9234.09	7232.63	7161.96	7068.72	8742.43	7704.42
MW0001970	2-(4-tert-Butylphenoxy)propanoic acid	C13H18O3	286.1413	222.1256	0.6433	2.9102	6941-12-4	--	--	--	246868	Benzenoids	Benzene and substituted derivatives	4737.8	2718.11	5252.98	983.59	478.04	4565.64	149.44	174.5	77.46	739.88	249.01	65.19
MW0007161	Fluazifop	C15H12F3NO4	655.1511	327.0718	0.6459	0.6256	69335-91-7	--	C18527	--	91701	Benzenoids	Benzene and substituted derivatives	2481.68	2714.35	5082.31	3784.08	1697.62	5275.49	2712.17	3697.75	2167.67	1231.31	3171.48	2292.95
MW0123173	Buprofezin	C16H23N3OS	372.1095	305.1562	0.8983	8.1896	69327-76-0	--	C10912	68681	50367	Organoheterocyclic compounds	Thiadiazinanes	11382.04	12435.44	16313.6	8357.45	10599.07	13288.61	7328.17	7738.56	8415.91	9089.23	9899.89	7745.22
MW0102909	trans-Vaccenic acid	C18H34O2	329.2693	282.2559	0.5768	8.5849	693-72-1	HMDB0003231	C08367	--	5281127	Lipids and lipid-like molecules	Fatty Acyls	297620.74	628197.21	763214.37	203647.45	558528.89	604558.5	313405.76	329499.75	317998.52	416542.37	391649.15	300581.85
MEDN0311	Dodecanedioic Aicd	C12H22O4	248.1757	230.1518	0.8449	5.9464	693-23-2	HMDB0000623	C02678	--	--	FA	FFA	1301.75	614.58	969.03	1215.0	1345.02	1218.68	1645.54	1086.83	756.16	1216.43	2027.55	1405.95
MW0053813	Harpagide	C15H24O10	751.2627	364.1369	0.6276	7.4265	6926-08-5	--	--	--	10044294	--	--	454.7	1724.09	1365.97	1576.92	1096.29	1387.08	486.01	229.35	478.61	483.5	148.31	292.73
MEDN0052	N6-Acetyl-L-Lysine	C8H16N2O3	258.1155	188.11599999999999	0.9431	6.3034	692-04-6	HMDB0000206	C02727	--	92832	Amino acid and Its metabolomics	Amino acid derivatives	1903.41	1698.49	1657.04	2121.44	2491.84	1878.07	3872.45	3226.52	3232.26	3440.31	3563.19	3425.84
MW0125356	N-(3-Amino-3-oxopropyl)-5-(dithiolan-3-yl)pentanamide	C19H34N2O2S4	451.14099999999996	450.1503	0.5907	7.9844	691410-93-2	--	--	44919	118856241	--	--	1981.37	1859.49	1844.87	2099.98	3175.01	2055.83	3100.25	3161.63	1844.47	2321.66	2273.37	2498.78
MW0151771	Iridotrial;(1S,2R,3S)-2-Formyl-alpha-(hydroxymethylene)-3-methylcyclopentaneacetaldehyde	C10H14O3	184.1052	182.0943	0.9771	7.1029	69098-42-6	--	C06070	--	53297344	Lipids and lipid-like molecules	Prenol lipids	1063.58	1454.88	1724.02	693.42	1286.0	1154.4	429.52	633.84	369.89	551.27	857.54	580.24
MW0126735	Tetrahydro-L-biopterin	C9H15N5O3	500.2698	241.1175	0.5672	3.2853	69056-38-8	HMDB0000027	C00272	64878	135398654	Organoheterocyclic compounds	Pteridines and derivatives	16364.34	26792.34	28054.76	22735.78	33016.87	25344.34	63586.95	53460.16	54882.69	50643.96	69958.09	61830.13
MW0118317	2-Bromo-4,5-diphenyl-1H-imidazole	C15H11BrN2	340.0441	298.0106	0.6296	1.8979	69045-24-5	--	--	--	911229	Organoheterocyclic compounds	Azoles	876.46	1579.25	1611.37	1592.77	1090.43	1693.66	1609.14	1956.84	1526.53	1070.46	476.54	1576.0
MW0154552	N-Methylpavine	C21H25NO4	373.2123	355.1784	0.649	7.191	6901-16-2	--	C20770	--	98569	Alkaloids and derivatives	Pavine alkaloids	694.92	1155.6	384.87	476.97	508.55	443.72	783.93	1505.87	310.39	554.34	976.82	1141.27
MW0009943	Toltrazuril	C18H14F3N3O4S	501.9839	425.0657	0.5953	0.6742	69004-03-1	--	D06187	--	68591	Benzenoids	Benzene and substituted derivatives	6655.75	7475.93	7313.96	6746.65	7445.3	8764.09	5934.18	5932.9	4729.49	6412.51	2575.2	5245.41
MW0146685	beta-Maltose	C12H22O11	307.1026	342.1162	0.9538	0.8651	69-79-4	HMDB0000163	C00208	--	10991489	Organic oxygen compounds	Organooxygen compounds	61665.18	76866.72	67169.15	88257.94	95574.22	73259.44	53055.78	59798.32	58290.42	48989.19	49210.34	62468.3
MEDL01913	Salicylic acid	C7H6O3	139.0388	138.0322	0.7692	11.8197	69-72-7	HMDB0001895	C00805	--	338	Phenolic acids	Phenolic acids	66622.06	71174.71	73324.7	72812.14	50790.43	12776.22	33741.5	28695.54	39497.12	76508.1	65669.02	103670.17
MW0145043	Ampicillin sodium	C16H18N3O4S.Na	372.1023	371.0916	0.7256	13.7026	69-52-3	HMDB0014559	C13652	--	23663979	Organic acids and derivatives	Carboxylic acids and derivatives	935529.88	408023.59	266079.35	249013.87	215245.85	191684.27	187889.8	138967.74	207599.02	289031.47	189530.64	238577.62
MW0126905	Uncarine A	C21H24N2O4	369.1812	368.1736	0.7451	4.5224	6899-73-6	--	C17593	--	188999	Organoheterocyclic compounds	Indolizidines	15874.97	40594.76	32139.3	27582.63	45341.77	37888.49	17636.85	20318.42	17991.39	18428.05	27691.06	19279.63
MW0006821	Diethyl phthalate	C12H14O4	445.1732	222.0892	0.7261	5.0266	68988-18-1	HMDB0094660	C14175	--	6781	Benzenoids	Benzene and substituted derivatives	22221.17	28115.83	26785.94	14332.36	24634.64	21799.76	19210.3	19180.63	18561.08	21841.22	18620.78	17447.01
MW0054179	Jasmonic acid	C12H18O3	249.0892	210.1256	0.6805	4.0158	6894-38-8	HMDB0032797	C08491	3345	5281166	Lipids and lipid-like molecules	Fatty Acyls	2350734.42	1530437.42	1683848.65	1345523.3	782145.96	1814399.93	452520.73	512681.87	503294.98	465474.69	584052.74	468616.82
MW0147670	Clionamide	C19H18BrN3O4	396.0343	431.0481	0.6387	8.6287	68835-91-6	--	C17092	--	23424664	Organoheterocyclic compounds	Indoles and derivatives	1937.43	1920.67	2643.3	1225.42	1394.71	2168.51	701.49	767.33	302.27	848.68	1234.26	937.48
MW0150578	Glycyrrhizinate dipotassium;Dipotassium glycyrrhizate;Dipotassium(3beta,20beta)-20-carboxy-11-oxo-30-norlean-12-en-3-yl-2-O-beta-D-gucopyranuronosyl-alpha-D-glucopyranosiduronate	C42H60O16.2K	899.3099	898.3156	0.5122	0.7771	68797-35-3	--	C14049	--	656852	Lipids and lipid-like molecules	Prenol lipids	357.55	294.12	734.07	858.63	553.01	426.6	2234.24	83.98	1193.25	1740.08	1619.97	2497.17
MW0139303	Peonidin-3-glucoside	C22H23O11	486.1134	463.124	0.6491	10.6668	68795-37-9	HMDB0013689	C12141	--	443654	Phenylpropanoids and polyketides	Flavonoids	6.61	2.38	5.42	4.86	6.54	1.28	4.67	8.77	1.32	6.38	0.34	5.59
MW0124314	Himbacine	C22H35NO2	387.3006	345.2668	0.6484	9.1751	6879-74-9	--	C10598	68418	6436265	Organoheterocyclic compounds	Naphthofurans	158591.42	186147.03	262619.8	111636.62	140892.97	182851.12	110243.77	108819.87	104302.72	129646.08	124901.57	105458.19
MW0005333	4-tert-Butyl-N'-[(E)-(2-hydroxynaphthalen-1-yl)methylidene]benzohydrazide	C22H22N2O2	385.1294	346.1681	0.6983	7.4825	68758-85-0	--	--	--	135459006	Benzenoids	Naphthalenes	1854.16	1588.63	1284.51	2168.71	1688.54	901.16	2503.83	2462.38	847.04	2368.38	2539.83	2912.06
MW0107036	Glu-Thr	C9H16N2O6	231.0967	248.1008	0.682	5.8272	6875-80-5	HMDB0028829	--	--	6998031	Organic acids and derivatives	Carboxylic acids and derivatives	10040.68	7936.19	8316.26	16276.27	15730.09	8070.77	11560.95	12263.14	11672.96	18826.75	14751.0	13646.2
MW0122723	Acetamide, N-(6-methyl-2-benzothiazolyl)-2-[[3,4,6,7-tetrahydro-3-(2-methoxyphenyl)-4-oxothieno[3,2-d]pyrimidin-2-yl]thio]-	C23H20N4O3S3	461.0563	496.0698	0.6175	1.0278	686772-17-8	--	--	--	2155264	Organoheterocyclic compounds	Thienopyrimidines	16992.17	6224.11	14615.63	6999.81	5537.68	8949.81	5004.36	6875.18	8903.34	7907.38	9885.02	8939.1
MW0127247	2-[4-(dimethylamino)butyl]isothiourea	C7H17N3S	198.0969	175.1143	0.674	2.2283	68643-23-2	--	--	--	5227	Organosulfur compounds	Isothioureas	1379.11	2516.3	2600.86	3659.58	9792.86	2903.79	3206.36	3188.01	3907.11	2487.4	2253.12	1652.18
MW0002066	2,2',4,4',5,5'-Hexabromodiphenyl ether	C12H4Br6O	679.5685	637.5362	0.5821	11.208	68631-49-2	HMDB0037525	C18137	--	155166	Benzenoids	Benzene and substituted derivatives	3139.38	336.09	935.8	180.82	2278.66	396.2	2158.84	424.83	372.07	332.31	306.76	2493.06
MW0153318	Magnoline	C36H40N2O6	597.2756	596.2886	0.5409	9.0954	6859-66-1	--	C06515	--	440585	Organoheterocyclic compounds	Isoquinolines and derivatives	661.91	2758.7	1127.84	1268.95	2307.0	1941.96	833.58	548.92	909.78	195.7	747.73	776.01
MW0124506	Isorhynchophylline	C22H28N2O4	385.2117	384.2049	0.5844	10.0597	6859-01-4	--	C16980	--	3037048	Organoheterocyclic compounds	Indolizidines	6408.64	5921.24	5345.87	9221.22	6946.15	4056.71	9067.07	9059.78	9699.4	7348.41	6577.52	8748.4
MW0154719	Oleandolide	C20H34O7	388.2413	386.2305	0.9813	6.7522	68540-16-9	--	C11990	--	443564	Phenylpropanoids and polyketides	Macrolides and analogues	90266.33	113722.07	154560.08	67621.96	97045.51	117511.41	69413.14	71512.45	67987.13	82318.65	92263.13	71435.09
MW0122093	6-Chloro-8-nitroquinoline	C9H5ClN2O2	191.0006	208.00400000000002	0.644	13.8347	68527-66-2	--	--	--	110462	Organoheterocyclic compounds	Quinolines and derivatives	2536.34	1661.09	1395.36	2010.68	1149.51	2073.34	1957.36	1724.36	742.25	675.83	4027.95	2741.03
MW0009970	Tribenzylamine N-oxide	C21H21NO	629.3143	303.1623	0.6313	9.0426	6852-46-6	--	--	24081	3624962	Benzenoids	Benzene and substituted derivatives	1802.27	1312.3	881.74	2172.69	2563.81	2129.11	2612.07	2354.98	1763.77	2282.76	2932.23	2539.28
MW0001732	2-(1,2,3,4-Tetrahydronaphthalen-1-yl)ethan-1-ol	C12H16O	149.0961	176.1201	0.7429	13.684000000000001	68480-12-6	--	--	--	98036	Benzenoids	Tetralins	3744.47	6616.78	14366.22	6726.2	7974.78	4154.08	3993.1	3658.54	7816.11	5338.49	6247.76	6421.91
MW0104380	2,2,4-Trimethyl-1,3-pentanediol diisobutyrate	C16H30O4	309.2054	286.2144	0.7517	5.7241	6846-50-0	HMDB0059777	--	--	23284	Organic acids and derivatives	Carboxylic acids and derivatives	41451.63	55850.79	62722.51	50084.38	60204.69	60560.91	59516.7	57446.99	2795.21	43151.28	63310.19	33809.72
MW0108541	N-[Tris(hydroxymethyl)methyl]-3-amino-2-hydroxypropanesulfonic acid	C7H17NO7S	242.0688	259.0726	0.9740000000000001	6.996	68399-81-5	--	--	--	109334	Organic acids and derivatives	Organic sulfonic acids and derivatives	15951.23	16473.85	16674.37	15926.93	18108.52	16726.41	20345.8	18513.19	18773.24	19007.53	19295.02	20398.44
MW0119135	3-(N-Morpholino)-2-hydroxypropanesulfonic acid	C7H15NO5S	248.0589	225.0671	0.7442	10.6668	68399-77-9	--	--	--	109333	Organoheterocyclic compounds	Oxazinanes	795.55	641.33	673.04	445.77	6.39	703.33	12.96	329.03	326.95	5.14	6.06	225.3
MW0147676	Clofilium	C21H37ClN	694.5593	338.2615	0.5482	11.187999999999999	68379-02-2	--	C13772	--	2798	Benzenoids	Benzene and substituted derivatives	15523.33	6915.79	21867.35	7029.97	24403.79	34095.75	13958.25	6904.79	12472.8	48046.94	33554.92	32361.01
MW0139282	Pentamycin	C35H58O12	693.3765	670.3928	0.7446	2.5794	6834-98-6	--	C13299	--	5282200	Phenylpropanoids and polyketides	Macrolides and analogues	3811.74	1343.8	13126.79	2174.81	149.04	2379.72	613.91	643.78	307.7	4384.97	776.8	974.9
MW0140422	(4R,7S)-7-Isopropyl-4-methyloxepan-2-one;(4R,7S)-4-Methyl-7-(1-methylethyl)-2-Oxepanone;Mentholactone	C10H18O2	343.2752	170.1307	0.988	8.5118	68330-67-6	--	C18027	--	11116489	Organoheterocyclic compounds	Lactones	69803.13	85933.02	106963.0	57645.17	79399.78	86572.76	54187.47	51061.59	50803.1	63033.11	66662.71	53853.14
MW0127106	Dioctylphosphinic acid	C16H35O2P	619.4372	290.2375	0.6046	11.4382	683-19-2	--	--	--	99411	Organophosphorus compounds	--	6961.67	11793.93	12871.61	11154.17	43586.92	7445.12	49837.63	20418.43	23662.31	55722.99	11007.59	9145.8
MW0125361	N-(3-Chlorobenzyl)quinuclidin-3-amine	C14H19ClN2	518.2816	250.1237	0.6275	2.8895	682778-37-6	--	--	--	17158964	Organoheterocyclic compounds	Quinuclidines	2292.77	3265.64	4400.47	2680.2	3063.11	3102.71	2151.76	1705.53	2010.52	1873.93	2334.83	1724.57
MW0148253	Demephion-O	C5H13O3PS2	199.0011	216.0044	0.6492	7.2285	682-80-4	--	C18975	--	115123	Organic acids and derivatives	Organic thiophosphoric acids and derivatives	16991.0	9167.53	63615.92	20480.91	9154.54	8905.1	67589.14	16480.84	27288.22	17256.68	9485.75	17903.31
MEDP1139	Linoleylethanolamide	C20H37NO2	324.2898	323.2824	0.6866	9.9115	68171-52-8	-	-	--	2183	Alcohol and amines	Amines	554.51	516.38	1782.69	996.46	1593.56	933.17	1033.94	1775.98	3034.37	1179.92	1865.86	1572.42
MW0009954	trans-3,4-Dihydro-3,4-dihydroxy-7,12-dimethylbenz[a]anthracene	C20H18O2	598.2956	290.1307	0.6338	9.2924	68162-13-0	HMDB0060517	C19490	--	156317	Benzenoids	Phenanthrenes and derivatives	714.1	2177.22	1549.21	1140.77	1786.22	1540.55	1014.39	434.78	30.31	954.79	1162.0	649.34
MW0117265	1-Phenyl-5-(3,4,5-trimethoxybenzylidene)barbituric acid	C20H18N2O6	402.0978	382.1165	0.6652	4.1082	68160-65-6	--	--	--	1353216	Organoheterocyclic compounds	Diazines	18924.22	22554.84	20546.99	20879.96	26361.87	20283.49	29889.15	26816.16	27932.67	29998.04	29041.74	28375.04
MW0103923	(4E)-2-Phenyl-4-(thiophen-2-ylmethylidene)-1,3-oxazol-5(4H)-one	C14H9NO2S	220.0215	255.0354	0.6467	0.579	68100-05-0	--	--	--	1549752	Organic acids and derivatives	Carboxylic acids and derivatives	11581.6	11290.38	13575.05	10548.47	8978.1	12391.11	6185.02	7097.81	7447.71	6859.77	9360.55	6604.6
MW0159335	Versicolorin A	C18H10O7	715.0477	338.0427	0.6083	0.6739	6807-96-1	--	C20583	--	638297	Benzenoids	Anthracenes	2319.91	3762.69	2161.86	3969.42	1689.39	3604.93	2916.05	3127.35	2477.55	2278.19	614.03	1110.26
MW0001366	1,4-Dibutoxy-2-chlorobenzene	C14H21ClO2	530.2798	256.123	0.8924	3.8525	68052-10-8	--	--	--	106465	Benzenoids	Phenol ethers	155644.41	234842.96	236715.98	658734.4	435206.95	222083.42	1077476.26	792639.47	969538.82	765728.42	1045772.98	1091081.3
MW0109553	S-(4-Nitrobenzyl)glutathione	C17H22N4O8S	465.1014	442.1158	0.7409	3.7485	6803-19-6	--	--	4098	97538	--	--	182.82	217.67	147.37	69.81	529.43	80.59	4482.34	2610.41	2913.52	4950.22	2070.48	2798.26
MW0107230	Hexamethylphosphoramide	C6H18N3OP	221.1536	179.1187	0.5711	5.3819	680-31-9	--	C19250	--	12679	Organic acids and derivatives	Organic phosphoric acids and derivatives	24565.73	30303.71	26549.47	22617.09	24304.09	26706.53	23595.52	29652.55	28896.44	31174.36	31168.45	23646.73
MEDN0163	Hypoxanthine	C5H4N4O	137.0456	136.039	0.8111	1.8924	68-94-0	HMDB0000157	C00262	--	135398638	Nucleotide And Its metabolomics	Nucleotide and Its metabolomics	23259.16	19597.21	2564.34	22893.4	15583.42	22335.04	70022.99	33446.93	33661.23	30593.34	43466.88	42946.17
MW0063823	Tetrahydrocorticosterone	C21H34O4	428.1644	350.2457	0.8167	7.9844	68-42-8	HMDB0000268	C05476	--	65553	Lipids and lipid-like molecules	Steroids and steroid derivatives	18123.32	19719.04	21010.83	19087.8	20935.08	18311.17	15658.33	16737.23	17920.86	17736.69	15708.15	15554.05
MW0123472	Cycloserine	C3H6N2O2	367.07	102.0429	0.6359	0.0194	68-41-7	HMDB0014405	C08057	--	6234	Organoheterocyclic compounds	Azolines	1166.58	1198.34	827.41	714.11	819.47	1105.13	823.18	718.49	1038.38	1078.75	1117.02	1148.03
MW0055368	Norethindrone	C20H26O2	299.1909	298.1933	0.7051	7.4118	68-22-4	HMDB0014855	C05028	--	6230	Lipids and lipid-like molecules	Steroids and steroid derivatives	2824.12	5808.97	4455.23	8374.22	9960.9	5386.88	525.86	746.33	168.99	5798.99	1065.27	872.37
MEDP0366	N,N-Dimethylformamide	C3H7NO	56.0497	73.053	0.8611	8.4086	68-12-2	HMDB0001888	C03134	--	6228	Alcohol and amines	Amines	48596.03	15845.74	21562.1	12634.36	22765.83	41531.96	52137.19	57605.4	62592.05	56683.96	55834.63	58487.72
MW0126591	Stearoylserotonin	C28H46N2O2	484.3886	442.3559	0.5799	9.1322	67964-87-8	--	--	62950	594460	Organoheterocyclic compounds	Indoles and derivatives	6422.6	3341.55	7470.43	4762.6	5494.83	4220.69	10723.79	6974.19	347.57	5823.32	5606.74	9208.72
MW0012097	11-Dehydro-thromboxane B2	C20H32O6	392.2123	368.2199	0.9556	6.3502	67910-12-7	HMDB0004242	C05964	36259	5280891	Lipids and lipid-like molecules	Fatty Acyls	2863.1	6409.19	4819.28	8123.46	8678.37	6239.29	4939.88	5165.02	2770.15	9735.26	5572.59	3341.18
MW0017148	cis-3-Hexenyl tiglate	C11H18O2	246.1489	182.1307	0.5408	5.4557	67883-79-8	HMDB0038279	--	--	15461361	Lipids and lipid-like molecules	Fatty Acyls	1488.64	4811.3	3644.09	4387.61	6195.61	4509.24	7392.02	7190.7	4463.77	3834.52	6516.79	7985.13
MEDP1824	Caftaric acid	C13H12O9	359.2425	312.23	0.8778	7.7501	67879-58-7	HMDB0013680	-	--	6440397	Organic acid And Its derivatives	Organicacid and Its derivatives	5197.65	9682.59	11858.77	6585.11	11560.25	10455.83	9907.42	10117.51	8507.44	7299.33	10677.47	9077.26
MW0156582	Scymnol;5beta-Scymnol;5beta-Cholestane-3alpha,7alpha,12alpha,24,26,27-hexol	C27H48O6	486.3778	468.3451	0.5774	8.1896	6785-34-8	--	C16260	--	165531	Lipids and lipid-like molecules	Steroids and steroid derivatives	3000.8	2917.8	3828.58	2938.03	2643.19	2702.1	1957.36	1984.29	54.53	1441.63	1702.05	1286.03
MW0119995	4-(Thiophen-2-yl)-6-(trifluoromethyl)pyrimidin-2-ol	C9H5F3N2OS	268.9966	246.0075	0.6336	13.3625	67804-95-9	--	--	--	756548	Organoheterocyclic compounds	Diazines	5233.23	3485.79	6004.13	1612.27	5658.45	2099.41	1800.69	3107.06	2243.68	2552.75	2882.35	1752.15
MEDN0545	6-ketoProstaglandin E1	C20H32O6	435.1731	368.2199	0.9671	5.5449	67786-53-2	HMDB0004241	C05962	--	5280889	Oxidized lipids	Oxidized lipids	7537.39	3768.05	3003.34	10270.83	8989.55	2763.03	7086.61	6733.57	7320.98	11253.51	8208.59	9205.3
MW0008185	N-(3-Chlorophenyl)-5-nitro-2-furamide	C11H7ClN2O4	555.008	266.0094	0.6427	0.5541	67764-28-7	--	--	--	754519	Benzenoids	Benzene and substituted derivatives	8259.3	8886.88	8785.61	7772.13	8161.1	6761.58	8076.79	6620.44	5101.15	3115.82	8451.32	5208.7
MW0017134	cis-11-Methyl-2-dodecenoic acid	C14H26O2	259.1905	226.1933	0.747	5.6084	677354-23-3	--	C18206	44999	11469920	Lipids and lipid-like molecules	Fatty Acyls	80072.07	48909.3	46094.97	44519.43	50851.0	46900.0	54205.8	98924.18	53893.83	58065.95	72677.7	62299.68
MW0105602	Amastatin	C21H38N4O8	987.5013	474.269	0.6431	11.0266	67655-94-1	--	C01552	--	439518	Organic acids and derivatives	Peptidomimetics	3645.88	20.87	1863.14	22.74	1662.54	2773.8	1753.34	2668.67	2391.61	3369.15	3896.94	3486.85
MW0109312	Pro Glu	C10H16N2O5	283.0691	244.1059	0.649	3.5206	67644-00-2	--	--	23678	194260	Organic acids and derivatives	Carboxylic acids and derivatives	3454.17	2269.27	2789.85	128.12	618.72	3446.15	242.43	460.91	330.54	83.74	163.53	264.71
MW0103830	(2,4-Dimethylcyclohexyl)methyl acetate	C11H20O2	231.1593	184.1463	0.89	4.5379	67634-22-4	--	--	--	106746	Organic acids and derivatives	Carboxylic acids and derivatives	49927.48	54706.14	48887.18	53247.77	47397.63	49621.06	61788.2	63134.7	59357.6	62155.54	78041.29	64996.55
MW0108511	N-[(3s)-2-Oxotetrahydrofuran-3-Yl]butanamide	C8H13NO3	189.1235	171.0895	0.6481	0.8358	67605-85-0	--	C11837	36732	10130163	Organic acids and derivatives	Carboxylic acids and derivatives	4782.03	5585.77	5435.73	6733.62	7918.46	5531.43	6847.24	5525.87	5559.05	4430.67	5602.52	4692.09
MW0012269	13(S)-HpOTrE； (9Z,11E,13S,15Z)-13-Hydroperoxyoctadeca-9,11,15-trienoic acid	C18H30O4	357.2276	310.2144	0.5421	6.6129999999999995	67597-26-6	--	C04785	36052	5497123	Lipids and lipid-like molecules	Fatty Acyls	7940.31	4072.44	1967.16	5264.82	2501.2	997.47	2755.53	1708.64	1737.0	2835.75	4211.31	2397.81
MW0115161	Polygodial	C15H22O2	281.1723	234.162	0.5973	6.1291	6754-20-7	--	C09712	--	72503	Organic oxygen compounds	Organic oxides	23858.46	23919.24	23961.97	33311.54	34160.46	26052.4	28601.06	35761.28	31010.39	44841.92	42860.14	32440.23
MW0109829	Thapsigargin	C34H50O12	689.2934	650.3302	0.6494	10.6197	67526-95-8	--	C09561	41196	446378	Organic acids and derivatives	Carboxylic acids and derivatives	2089.77	3064.12	3735.28	837.04	2184.1	1957.57	1341.7	820.09	1311.7	583.67	1053.12	911.43
MW0107232	Hexanoic acid, 6-(acetyloxy)-2,3,3a,4,5,6,6a,7,8,9b-decahydro-3,3a-dihydroxy-3,6,9-trimethyl-8-[(2-methyl-1-oxo-2-buten-1-yl)oxy]-2-oxo-4-(1-oxobutoxy)azuleno[4,5-b]furan-7-yl ester	C32H46O12	587.285	622.2989	0.6489	5.1742	67526-94-7	--	--	--	5353992	Organic acids and derivatives	Carboxylic acids and derivatives	7884.99	4429.01	4957.41	5065.31	1712.64	3497.8	3170.86	4021.57	3355.42	4300.69	2717.94	3101.77
MW0115710	tert-Butyl 4,4-difluorocyclohexylcarbamate	C11H19F2NO2	274.1013	235.1384	0.6242	6.3344	675112-67-1	--	--	--	22175003	Organohalogen compounds	Alkyl halides	4159.29	4538.99	3071.75	4325.86	3466.49	4265.77	3640.89	2620.56	1055.2	3513.54	4031.22	4151.94
MEDP0541	δ-Valerolactam	C5H9NO	100.0756	99.0684	0.875	2.0622	675-20-7	HMDB0011749	-	--	--	Alcohol and amines	Amines	6327.36	9377.14	8622.7	7334.62	10098.26	8371.05	13185.53	11559.49	11069.28	8945.14	16733.91	13775.74
MW0106590	Enalaprilat tert-butyl ester	C22H32N2O5	405.2399	404.2311	0.8964	10.6034	674796-29-3	--	--	--	58732182	Organic acids and derivatives	Carboxylic acids and derivatives	26984.12	27624.28	24812.37	28090.5	27516.16	22700.08	31582.31	30666.75	31531.69	29392.5	28581.9	32099.0
MW0010040	Vanylglycol	C9H12O4	202.1076	184.0736	0.6267	4.4793	67423-45-4	HMDB0001490	C05594	698	10805	Benzenoids	Phenols	5124.22	4828.77	5272.33	5015.57	5431.74	5200.43	7456.13	6131.14	5547.16	6223.17	7196.36	7175.12
MW0110926	Bethanechol cation	C7H17N2O2	340.2923	161.129	0.6175	8.8062	674-38-4	HMDB0015154	C06850	1323	2370	Organic nitrogen compounds	Organonitrogen compounds	6540.99	2005.35	2608.42	6635.52	4024.27	3894.51	7020.7	6943.27	7800.1	9469.91	8108.19	6364.92
MW0007213	Formoterol	C19H24N2O4	345.1847	344.1736	0.589	3.8978	67346-49-0	HMDB0015118	C07805	--	3410	Benzenoids	Benzene and substituted derivatives	39547.64	58063.37	61073.46	74940.89	78476.03	57038.22	66026.31	71207.08	69846.27	75057.49	70496.14	75082.38
MW0007136	Fenpropidin	C19H31N	569.4797	273.2456	0.5984	11.2882	67306-00-7	--	C18726	72501	91694	Benzenoids	Benzene and substituted derivatives	7467.16	5442.05	8261.3	7228.59	7143.69	7549.42	7513.06	4780.16	5248.69	6993.32	7299.13	6571.49
MW0110623	1-Methylhistamine	C6H11N3	170.0664	125.0953	0.6309	0.569	673-50-7	HMDB0061685	C05127	251	3614	Organic nitrogen compounds	Organonitrogen compounds	14259.68	15233.49	15403.59	12748.9	12457.69	10467.93	13763.49	13695.18	14387.0	12844.38	15590.84	14212.4
MW0112152	2-Hexenal	C6H10O	197.1537	98.0732	0.6484	9.3809	6728-26-3	HMDB0031496	C08497	--	5281168	Organic oxygen compounds	Organooxygen compounds	4509.88	5410.11	12708.1	2739.54	4305.25	5595.25	3194.73	2824.43	311.32	2608.95	3991.87	2782.84
MW0168447	12-Oxo-10,15(Z)-Phytodienoic Acid	C18H28O3	427.2074	292.2038	0.6319	7.3529	67204-66-4	--	C13816	--	--	--	--	2298.16	3373.34	2835.39	1913.57	3146.01	3286.66	2354.72	2016.69	1711.75	2053.87	3324.66	2434.56
MW0001814	2-(3,4-Dichlorophenyl)-N-methyl-N-[(1R,2R)-2-pyrrolidinocyclohexyl]acetamide	C19H26Cl2N2O	369.1522	368.1422	0.6916	4.4342	67198-13-4	--	C11796	--	3036289	Benzenoids	Benzene and substituted derivatives	7119.91	11048.54	8499.35	8605.44	10794.91	9921.43	3722.47	4206.02	4802.74	6215.13	5611.46	3690.78
MW0001757	2-(2,4-Dichlorophenyl)thiazolidine	C9H9Cl2NS	233.9827	232.9833	0.6777	0.4482	67189-27-9	--	--	--	3050889	Benzenoids	Benzene and substituted derivatives	51922.1	60242.97	50443.56	50615.52	57999.16	48801.6	56262.92	48683.96	45601.47	57846.63	49233.68	52682.02
MW0006503	Cardiogenol C	C13H16N4O2	243.1205	260.1273	0.6587	2.5798	671225-39-1	--	--	64802	11345983	Benzenoids	Benzene and substituted derivatives	17370.26	19607.86	18175.59	21718.46	23648.13	19388.26	25049.02	22823.31	22826.27	22810.48	28823.8	24131.82
MW0149882	Globomycin	C32H57N5O9	697.4474	655.4156	0.5624	6.6427	67076-74-8	--	C01700	--	115071	Organic acids and derivatives	Peptidomimetics	196.28	4120.71	3778.24	430.37	4202.21	4011.76	454.92	666.2	57.79	1256.44	1473.52	700.84
MW0009167	Norverapamil	C26H36N2O4	441.2827	440.2675	0.7044	6.1404	67018-85-3	HMDB0060540	--	3010	104972	Benzenoids	Benzene and substituted derivatives	8151.13	13428.67	16954.89	19936.86	17177.56	14656.89	19872.53	25896.81	18356.02	21076.11	21409.7	21719.8
MW0106582	Egtazic acid	C14H24N2O10	427.1548	380.1431	0.5276	3.258	67-42-5	--	D03967	--	6207	Organic acids and derivatives	Carboxylic acids and derivatives	6232.0	6434.84	8038.72	6939.75	7737.65	6533.9	7199.61	7514.57	6296.67	8204.71	7791.36	7239.88
MW0109251	Phosphocreatine	C4H10N3O5P	194.0325	211.0358	0.6462	0.6778	67-07-2	HMDB0001511	C02305	--	9548602	--	--	1606.22	789.9	1680.28	2616.33	1512.3	1551.75	1758.09	2723.34	2459.9	2580.57	2902.49	1658.99
MW0121056	5-[4-(Diethylamino)phenyl]-4-ethyl-4H-1,2,4-triazol-3-yl hydrosulfide	C14H20N4S	570.3154	276.1409	0.6394	7.4399	669748-44-1	--	--	--	2463110	Organoheterocyclic compounds	Azoles	1339.55	41.98	305.62	318.21	67.51	301.91	1082.99	1138.04	2198.46	348.24	1574.45	2018.69
MW0146686	Betamethasone 9,11-epoxide 17,21-dipropionate	C28H36O7	969.5011	484.2461	0.5976	4.2852	66917-44-0	--	--	--	--	--	--	7506.47	9734.41	10616.86	7738.94	6941.3	12033.84	5749.54	5418.84	5734.09	5494.21	7992.84	5309.8
MW0106385	Destruxin A	C29H47N5O7	600.3367	577.3476	0.6397	4.9829	6686-70-0	--	--	--	11421831	Organic acids and derivatives	Peptidomimetics	2033.87	3269.67	2066.2	2697.89	3726.37	3187.07	3257.15	2960.39	2951.59	3492.74	3149.36	2201.35
MW0157964	Tralomethrin	C22H19Br4NO3	643.8059	660.8098	0.6209	3.3161	66841-25-6	--	C18413	--	9809914	Lipids and lipid-like molecules	Fatty Acyls	29319.39	22041.8	15190.79	29262.85	15236.75	19922.02	27899.57	29050.83	28312.71	34463.89	47095.14	26558.8
MW0124676	Linagliptin	C25H28N8O2	473.2409	472.2335	0.6434	5.0414	668270-12-0	--	D09566	--	10096344	Organoheterocyclic compounds	Imidazopyrimidines	6270.42	4351.41	7071.91	12446.2	6074.4	5897.09	6937.4	10265.52	9148.81	12321.72	8428.92	11181.06
MW0138365	Hernandezine	C39H44N2O7	675.3039	652.3149	0.8899	3.4328	6681-13-6	--	C09461	--	72343	Phenylpropanoids and polyketides	Tannins	7120.81	4177.85	4745.01	6094.31	5066.98	4687.79	11615.21	7627.43	6947.34	5500.85	11243.4	12662.52
MW0149104	Evoxanthidine	C15H11NO4	314.0401	269.0688	0.6491	0.5625	668-35-9	--	C10668	--	442899	Organoheterocyclic compounds	Quinolines and derivatives	9308.49	8933.91	9836.86	10316.14	9135.92	14751.19	7200.03	3525.51	6925.36	3073.38	6141.32	5723.53
MW0139470	Pyrromycin	C30H35NO11	630.1926	585.221	0.6347	10.9628	668-17-7	--	--	44005	196990	Phenylpropanoids and polyketides	Anthracyclines	13981.93	5703.02	4092.21	4134.59	2266.4	1572.81	559490.61	3995.2	12883.08	4421.61	5496.41	5950.66
MW0144289	Aclacinomycin Y	C42H51NO15	754.27	809.3259	0.7469	0.6381	66789-14-8	--	C18639	--	53297392	Phenylpropanoids and polyketides	Anthracyclines	2613.05	1108.48	2609.06	2949.46	2614.22	3753.87	4250.41	1216.12	4437.17	2137.15	3321.92	2035.19
MW0004588	4-Allyl-3-(4-chlorobenzyl)-1H-1,2,4-triazole-5-thione	C12H12ClN3S	304.0073	265.04400000000004	0.6489	0.5552	667437-95-8	--	--	--	4586575	Benzenoids	Benzene and substituted derivatives	2274.9	1700.45	1166.55	2071.46	847.01	1751.85	756.75	380.58	1149.78	358.02	1272.73	992.83
MW0005498	5-[(4-Fluorophenoxy)methyl]-4-(prop-2-en-1-yl)-4H-1,2,4-triazole-3-thiol	C12H12FN3OS	548.1706	265.0685	0.6318	2.9059	667437-08-3	--	--	--	3767851	Benzenoids	Phenol ethers	11318.09	7168.26	8242.04	6778.85	7196.15	8004.63	2917.95	2573.86	1357.75	1725.92	5223.57	1485.78
MW0002537	2-[3-(Trifluoromethyl)phenoxy]propanehydrazide	C10H11F3N2O2	362.95300000000003	248.0773	0.5939	0.6439	667413-01-6	--	--	--	3409234	Benzenoids	Benzene and substituted derivatives	4913.05	6730.79	5576.04	4227.15	5130.35	6504.21	1415.88	1109.55	1729.58	730.6	1850.51	2049.16
MW0116743	1,8-Diazabicyclo[5.4.0]undec-7-ene	C9H16N2	327.2524	152.1313	0.6197	7.4263	6674-22-2	--	--	85157	81184	Organoheterocyclic compounds	Azepanes	6636.92	7310.1	5947.36	7834.8	5879.7	6447.43	10930.49	9742.57	10750.44	10504.57	14690.73	9859.83
MW0136703	6-Hydroxyflavone	C15H10O3	239.0685	238.063	0.5322	2.7203	6665-83-4	HMDB0141530	C14137	--	72279	Phenylpropanoids and polyketides	Flavonoids	3242.41	2214.39	2782.04	1801.92	504.03	2662.06	120.31	279.38	111.0	249.1	163.16	139.92
MEDL00349	Ser-Leu	C9H18N2O4	280.1617	233.1489	0.6466	6.2875	6665-16-3	HMDB0029043	-	--	7015695	Amino acid and Its metabolomics	Small Peptide	18794.23	32563.07	21191.7	16295.99	15393.38	14656.75	19839.29	26125.92	21458.35	26042.21	42565.03	23588.19
MW0128346	(E)-N-[2-Hydroxy-2-(4-hydroxyphenyl)ethyl]-3-(4-hydroxyphenyl)prop-2-enamide	C17H17NO4	616.2646	299.1158	0.5821	4.7019	66648-45-1	HMDB0032804	--	--	23874492	Phenylpropanoids and polyketides	Cinnamic acids and derivatives	59927.91	9920.81	24984.72	51256.95	4784.54	11065.98	3781.73	3937.75	3589.83	3491.04	4244.51	3743.01
MW0141669	19-Bromoaplysiatoxin	C32H46Br2O10	283.0194	748.1458	0.7240000000000001	1.0741	66648-18-8	--	C16770	--	46173824	Phenylpropanoids and polyketides	Macrolides and analogues	2397.83	1290.64	2057.4	3133.23	2949.06	3261.04	1463.41	2829.53	2755.38	3611.47	3029.93	1978.43
MW0105442	Agaric acid	C22H40O7	434.3109	416.2774	0.9764	7.2744	666-99-9	--	--	--	12629	Organic acids and derivatives	Carboxylic acids and derivatives	20827.45	24276.54	31616.28	15479.18	19156.69	21344.89	15240.17	16657.02	13902.78	11897.08	21865.34	14536.51
MEDN0449	4-Hydroxyretinoic Acid	C20H28O3	328.2128	316.204	0.5936	7.6034	66592-72-1	HMDB0006254	C16677	--	6438629	CoEnzyme and vitamins	CoEnzyme and vitamins	1708.06	99.09	357.04	392.32	112.54	228.81	5715.89	7334.25	3953.31	4817.97	3190.09	9604.91
MW0052939	Forskolin	C22H34O7	411.2348	410.2305	0.6371	6.4218	66575-29-9	--	C09076	--	47936	Lipids and lipid-like molecules	Prenol lipids	34434.76	26340.34	36452.68	30206.0	26531.03	29123.13	20081.23	30954.94	26350.85	24359.19	44307.71	23009.78
MW0147047	Candicine;Ammonium,(p-hydroxyphenethyl)trimethyl-	C11H18NO	219.1091	180.1388	0.511	2.4906	6656-13-9	--	C10575	--	23135	Benzenoids	Benzene and substituted derivatives	4729.8	3332.66	2567.3	2573.24	547.19	1614.58	4207.43	4630.73	3210.92	4730.75	4289.85	5237.35
MW0004839	4-Chloro-3-nitrobenzenesulfonohydrazide	C6H6ClN3O4S	297.988	250.9768	0.6516	0.5429999999999999	6655-80-7	--	--	--	2774214	Benzenoids	Benzene and substituted derivatives	10954.27	9406.19	10913.81	3753.71	7460.5	4529.27	6962.53	4131.34	5389.63	5958.66	6585.63	5446.76
MW0119856	4-(2-Pyridinyl)-2-pyrimidinamine	C9H8N4	173.0834	172.0749	0.7435	0.0699	66521-65-1	--	--	--	2764599	Organoheterocyclic compounds	Diazines	14339.95	15023.01	14952.71	15049.49	12090.29	10997.39	12765.91	6189.38	11622.48	7698.44	11225.35	11640.89
MEDP1228	Heterodendrin	C11H19NO6	308.134	261.1212	0.6704	1.3608	66465-22-3	-	C08332	--	181804	Others	Others	3420.84	6889.66	4682.12	9241.2	10008.98	6212.38	21258.82	20957.85	16337.51	6876.81	19575.49	23161.74
MW0007130	Fenoxaprop-ethyl	C18H16ClNO5	425.0874	361.0717	0.6433	0.9089	66441-23-4	--	C11024	--	47938	Benzenoids	Benzene and substituted derivatives	957.45	569.17	1721.54	1409.93	1867.26	1914.14	3341.77	2908.3	3033.25	4140.25	6683.96	2367.47
MW0122512	7-Methyl-2-(4-morpholinyl)-9-[1-(phenylamino)ethyl]-4H-pyrido[1,2-a]pyrimidin-4-one	C21H24N4O2	365.1936	364.1899	0.5134	10.6385	663619-89-4	--	--	45059	9907093	Organoheterocyclic compounds	Pyridopyrimidines	7766.26	8715.19	7071.67	10031.31	13760.48	5957.39	9899.49	10524.41	10959.28	9891.46	8789.1	10352.31
MW0000420	Ranitidine	C13H22N4O3S	449.1416	314.1413	0.6771	6.3317	66357-35-5	HMDB0001930	D00422	--	3001055	Organic nitrogen compounds	Organonitrogen compounds	1611.44	1866.47	1918.14	2121.86	2015.89	1105.18	2319.22	2272.27	93.36	2069.71	1560.35	2149.9
MW0116325	1-(2-Fluorophenoxy)-3-(4-phenyl-1-piperazinyl)-2-propanol	C19H23FN2O2	375.1456	330.1744	0.8927	3.8964	66307-47-9	--	--	--	2945814	Organoheterocyclic compounds	Diazinanes	97130.86	128113.2	123103.02	114275.88	120126.35	102280.71	103606.58	102825.96	101403.48	102343.98	97976.7	97835.17
MW0015569	Acovenoside A	C30H46O9	665.1891	550.3142	0.8942	0.6444	663-95-6	--	--	--	20055381	--	--	2995.08	1758.27	2716.95	6390.37	6328.8	1649.23	6769.62	7346.63	7030.8	8649.3	7849.28	7075.21
MW0157319	Synaptolepis factor K1	C36H54O8	615.3852	614.3819	0.5167	10.2081	66268-94-8	--	C09192	--	5281397	Lipids and lipid-like molecules	Prenol lipids	2239.09	3265.5	3471.05	1056.56	3010.98	1687.71	1475.3	1084.27	1810.29	1374.53	1525.45	1676.19
MW0009199	N-Pivaloylaniline	C11H15NO	377.2153	177.1154	0.5216	5.0124	6625-74-7	--	--	44986	81103	Benzenoids	Benzene and substituted derivatives	9982.31	8867.75	10829.91	4979.02	8801.61	6477.93	7278.57	5609.5	1923.36	5075.02	6984.88	9632.97
MW0123478	Cyromazine	C6H10N6	167.1065	166.0967	0.5742	2.58	66215-27-8	HMDB0029862	C14147	--	47866	Organoheterocyclic compounds	Triazines	10357.85	11215.08	11131.94	13243.49	13850.51	11562.64	14626.2	13888.67	13841.5	13306.38	15477.26	16227.13
MW0126532	Sedanolide	C12H18O2	195.1378	194.1307	0.7309	4.7913	66211-45-8	HMDB0034450	--	--	111213	Organoheterocyclic compounds	Isobenzofurans	167681.72	177949.52	161133.99	69551.27	178954.36	166001.52	198784.36	147480.74	188559.63	78932.58	51094.99	204635.45
MW0147484	Cimicifugoside	C37H54O11	716.3985	674.3666	0.5693	4.109	66176-93-0	--	C08935	--	441913	Lipids and lipid-like molecules	Steroids and steroid derivatives	74915.79	115842.09	117141.65	99061.98	135189.99	115832.91	160794.29	145577.24	165104.64	152246.2	178066.58	157661.76
MW0061062	Pergolide	C19H26N2S	315.1924	314.1817	0.6922	8.6658	66104-22-1	HMDB0015317	C07425	1787	47811	Organoheterocyclic compounds	Quinolines and derivatives	1377.37	2582.0	2670.0	2303.22	2418.64	4897.28	1601.38	2631.82	2333.14	2067.7	2674.85	3508.14
MW0142427	2-Hydroxymethylclavam	C6H9NO3	126.0547	143.0582	0.6355	0.8363	66036-39-3	--	C17357	--	3050259	Organoheterocyclic compounds	Lactams	6228.28	7408.56	7440.86	5424.03	5908.34	6514.49	5691.76	6922.02	6986.37	5602.33	5369.69	4195.28
MW0147518	cis-1,2-Dihydro-3-ethylcatechol;cis-2,3-Dihydroxy-2,3-dihydroethylbenzene;cis-3-Ethyl-cyclohexa-3,5-diene-1,2-diol	C8H12O2	164.0787	140.0837	0.9092	9.3211	66008-19-3	--	C06727	--	441155	Organic oxygen compounds	Organooxygen compounds	54436.21	53983.95	54413.46	57037.59	54047.75	49631.26	55415.03	53315.33	56686.71	54382.52	53589.0	55928.25
MW0123463	Cycloheximide	C15H23NO4	282.1704	281.1627	0.7259	2.7037	66-81-9	--	C06685	44124	6197	Organoheterocyclic compounds	Pyridines and derivatives	5706.35	7024.79	7586.32	3703.84	4723.92	6730.96	3765.42	2985.51	3132.56	4475.68	4324.48	4167.61
MW0001652	1-Naphthaldehyde	C11H8O	223.0108	156.0575	0.6459999999999999	0.5549	66-77-3	HMDB0060325	C14090	--	6195	Benzenoids	Naphthalenes	2340.57	1877.95	1973.39	1061.31	1421.29	1663.21	1358.44	908.12	1380.55	1898.49	1347.25	1030.63
MW0111301	Tetraethylammonium cation	C8H20N	226.2164	130.1596	0.7154	5.8272	66-40-0	--	C07512	--	5413	Organic nitrogen compounds	Organonitrogen compounds	519.25	496.58	302.85	644.53	706.71	649.31	606.8	537.96	130.59	494.99	454.28	464.29
MW0063691	Strophantidin	C23H32O6	369.2057	404.2199	0.6742	3.8882	66-28-4	--	C19988	--	6185	Lipids and lipid-like molecules	Steroids and steroid derivatives	11750.41	17799.88	15950.35	17277.55	17648.31	16609.82	16470.25	18956.38	16392.64	18742.26	18654.05	19206.08
MEDP0178	Uracil	C4H4N2O2	113.0344	112.027	0.9253	1.2265	66-22-8	HMDB0000300	C00106	--	1174	Nucleotide And Its metabolomics	Nucleotide and Its metabolomics	36493.23	42522.89	36199.88	25752.1	33322.08	34516.95	16254.18	10685.52	13304.4	13520.55	10251.45	13579.42
MW0149146	Fenitropan	C13H15NO6	320.0566	281.0899	0.7438	0.5996	65934-95-4	--	C18938	--	93358	Benzenoids	Benzene and substituted derivatives	2177.09	1879.31	3902.84	6367.95	7507.65	2709.1	2487.61	1590.03	4348.81	3592.83	3458.82	3771.04
MW0149270	Formylmethionyl-leucyl-phenylalanine methyl ester;FMLP OMe	C22H33N3O5S	515.2297	451.2141	0.8875	6.159	65929-03-5	HMDB0013243	C11221	--	122066	Organic acids and derivatives	Carboxylic acids and derivatives	20245.34	19601.59	17397.39	23815.52	19231.11	17447.08	20674.84	21883.91	20868.1	20421.02	22635.19	20060.73
MW0124185	Furathiocarb	C18H26N2O5S	405.1585	382.1562	0.7809999999999999	5.5326	65907-30-4	--	C18650	72436	47759	Organoheterocyclic compounds	Coumarans	4870.51	2815.63	1119.87	3474.33	3058.25	1027.08	2873.96	2780.52	2973.3	3035.27	2794.32	1780.82
MW0001861	2-(3-Pyridinyl)-2,3-dihydro-1H-perimidine	C16H13N3	512.2561	247.1109	0.6336	6.376	6584-41-4	--	--	--	256661	Benzenoids	Naphthalenes	9171.73	8132.69	8386.96	5163.18	8861.58	8138.24	8524.11	9297.04	9121.59	9662.89	7731.53	9780.49
MW0001739	2-(1-Naphthyl)-2,3-dihydro-1H-perimidine	C21H16N2	261.1176	296.1313	0.6369	0.7629	6584-38-9	--	--	--	257812	Benzenoids	Naphthalenes	6877.6	3783.67	4154.72	2300.42	6527.92	6643.11	2997.68	4884.04	4640.47	4620.54	3925.43	4244.66
MW0003357	2-Propenamide, N-[4-(1-benzoyl-4-piperidinyl)butyl]-3-(3-pyridinyl)-, (2E)-	C24H29N3O2	392.228	391.226	0.7684	4.5232	658084-64-1	--	--	45518	6914657	Benzenoids	Benzene and substituted derivatives	76033.23	92224.39	84681.01	99567.49	106438.69	90522.45	92112.17	94347.0	82271.36	78270.03	116088.51	93526.51
MW0007184	Fluopyram	C16H11ClF6N2O	831.0558	396.0464	0.6422	0.6669	658066-35-4	--	--	--	11158353	Benzenoids	Benzene and substituted derivatives	1345.63	2400.9	3490.45	2000.66	1064.67	1901.98	1485.56	1044.26	790.83	1840.94	1950.33	1813.7
MW0008753	N-{4-[(Ethylsulfonyl)amino]phenyl}ethanesulfonamide	C10H16N2O4S2	623.0735	292.0552	0.6491	0.9263	65749-31-7	--	--	--	305616	Benzenoids	Benzene and substituted derivatives	1248.14	1600.74	482.68	1841.29	1262.46	1243.98	2535.27	3568.72	2152.91	1918.15	3999.34	2124.43
MW0063520	S-Hydroprene	C17H30O2	267.2321	266.2246	0.5982	9.9728	65733-18-8	--	D01814	--	5282198	Lipids and lipid-like molecules	Prenol lipids	2391.87	2928.8	5080.63	1671.29	2883.41	3521.6	2050.62	1902.62	1749.65	2298.32	2082.57	1965.64
MW0006837	Dihydrocitrinone	C13H14O6	333.0324	266.079	0.6447	0.6625	65718-85-6	--	--	--	163095	Benzenoids	Benzene and substituted derivatives	1707.88	1196.1	668.9	1325.38	1634.04	414.59	315.67	560.0	601.03	891.61	789.61	947.81
MW0149129	Fasciculol E	C39H65NO11	688.4402	723.4558	0.5752	6.051	65694-20-4	HMDB0035189	C19957	--	128265	Lipids and lipid-like molecules	Prenol lipids	1632.53	1938.47	1853.98	2110.79	1837.41	1346.08	3103.62	3262.28	2787.88	2912.22	3609.75	3465.93
MW0009543	Propanedinitrile, 2-[[3-bromo-5-(1,1-dimethylethyl)-4-hydroxyphenyl]methylene]-	C14H13BrN2O	418.8958	304.0211	0.6216	0.674	65678-07-1	--	--	--	2044	Benzenoids	Benzene and substituted derivatives	2090.91	1940.24	1902.8	1991.81	951.58	1186.92	110.4	1073.24	785.55	639.89	304.16	134.23
MEDL01864	Phytolaccoside A	C36H56O10	690.4166	648.3848	0.5635	4.9239999999999995	65608-00-6	HMDB0034642	-	--	131751599	Terpenoids	Triterpene Saponin	647.99	1384.13	1550.8	701.38	1555.71	445.03	2372.99	1590.88	1715.48	2077.38	2067.36	1848.74
MW0010517	4'-Demethylepipodophyllotoxin	C21H20O8	423.1157	400.1158	0.5858	3.1248	6559-91-7	--	C21185	--	122797	Lignans, neolignans and related compounds	Lignan lactones	16078.0	15541.69	14431.27	16113.77	14080.49	14984.22	14471.26	17007.06	12399.14	12753.56	12886.8	12133.97
MEDN0237	D-Glucoronic Acid	C6H10O7	217.0343	194.043	0.5084	10.2669	6556-12-3	-	-	--	--	Carboxylic acids and derivatives	Sugar acids	14272.79	13376.35	13673.85	12483.51	13522.42	11245.88	13961.68	14666.2	14957.6	12781.28	13505.43	14751.81
MW0121288	5-Bromo-DL-tryptophan	C11H11BrN2O2	582.035	282.0004	0.6306	0.5538	6548-09-0	--	--	--	96735	--	--	2569.14	883.21	741.67	4142.85	2108.01	3005.31	1818.87	777.36	2401.2	474.18	1759.71	3306.06
MW0118151	2-[4-(4-Nitro-2,1,3-benzoxadiazol-5-yl)-1-piperazinyl]ethanol	C12H15N5O4	609.214	293.1124	0.6457	3.9452	65427-77-2	--	--	--	100317	Organoheterocyclic compounds	Diazinanes	346.92	2920.91	1791.72	3874.8	7444.3	2548.7	4513.06	8429.01	7023.83	6406.68	5605.3	9483.58
MEDL02717	12-Oxo-10E-Dodecenoic Acid	C12H20O3	195.1379	212.1412	0.6498	4.0341	65410-38-0	HMDB0037326	C16309	--	5312889	Lipids	Free fatty acids	4607.4	7048.94	5452.2	6107.73	7704.15	6542.04	9287.29	7757.59	8103.64	7336.34	9304.3	7808.07
MW0144952	alpha-D-Mannoheptulopyranose;Mannoheptulose	C7H14O7	193.0705	210.074	1.0	1.0467	654-29-5	--	C08236	--	11390178	Organic oxygen compounds	Organooxygen compounds	118851.47	100134.55	122358.92	77134.35	81052.43	98375.49	64650.75	63807.77	75819.6	83611.22	77441.0	71358.0
MW0106025	Bestatin(hydrochloride)	C16H24N2O4	309.1812	308.1736	0.6901	2.3451	65391-42-6	--	--	63060	11957481	Organic acids and derivatives	Peptidomimetics	13088.87	37224.38	38540.96	8714.41	33967.19	37225.03	10959.57	11041.43	10519.54	10316.21	14741.03	10659.85
MW0111125	N-(4-Aminobutyl)hydroxylamine	C4H12N2O	168.1097	104.095	0.5717	3.5922	6536-85-2	--	--	--	24883439	Organic nitrogen compounds	Organonitrogen compounds	12081.34	13534.87	13416.75	12735.22	12745.81	12826.96	13835.63	13282.4	14201.99	13717.62	15315.0	14144.48
MEDP1360	Mycosporine glycine	C10H15NO6	284.0467	245.0899	0.6443	0.5625	65318-21-0	-	-	--	14444486	Amino acid and Its metabolomics	Amino acid derivatives	60112.22	62289.52	68043.31	65509.96	60313.21	56687.69	43337.79	48935.1	48845.6	45039.78	61341.96	47897.09
MEDN1013	2'-Deoxyadenosine-5'-Monophosphate	C10H14N5O6P	332.0754	331.0682	0.7976	1.2718	653-63-4	HMDB0000905	C00360	--	12599	Nucleotide And Its metabolomics	Nucleotide and Its metabolomics	2179.01	3357.7	1667.0	3754.21	4180.52	2304.1	5772.47	5819.34	6265.13	6085.39	5327.09	5831.58
MW0007824	Mitoxantrone	C22H28N4O6	445.2228	444.2009	0.5831	3.6337	65271-80-9	HMDB0015335	C11195	--	4212	Benzenoids	Anthracenes	47182.25	50907.08	61819.94	19300.13	40024.32	65140.74	5685.96	17955.03	16183.4	40817.84	4239.02	2838.98
MW0015932	Arvenin II	C38H58O13	745.3843	722.3877	0.9276	6.2831	65247-28-1	--	--	--	45359751	Lipids and lipid-like molecules	Steroids and steroid derivatives	5142.01	4127.88	3737.16	6118.63	5217.03	2086.38	6049.47	7278.92	3919.45	4888.95	8189.19	8076.41
MW0009657	Remazol Brill Blue R	C22H18N2O11S3	600.0407	582.0073	0.6273	1.4321	6522-88-9	--	--	--	17410	Benzenoids	Anthracenes	712.06	693.72	680.22	729.45	666.87	988.55	1875.94	1914.89	1319.34	2090.52	2599.61	1412.13
MEDP1904	LPE(18:2/0:0)	C23H44NO7P	478.2924	477.2855	0.7340000000000001	8.1606	652149-09-2	HMDB0011517	-	--	52925130	GP	LPE	100785.28	26621.7	23523.91	114551.17	51945.17	37386.97	30732.27	35155.15	38440.72	31903.96	37518.12	32404.3
MW0146476	Avermectin B2b	C47H72O15	943.4394	876.4871	0.6157	3.1266	65195-58-6	--	C11959	--	102093854	Phenylpropanoids and polyketides	Macrolides and analogues	1136.15	758.86	969.99	997.85	888.27	600.39	2360.89	1706.74	2376.29	2400.18	1493.16	2125.63
MW0127285	3-(Dimethylamino)propyl imidothiocarbamate	C6H15N3S	323.2045	161.0987	0.6356	3.3392	65119-89-3	--	C17930	--	3077	Organosulfur compounds	Isothioureas	1805.13	2833.97	2077.39	2023.65	2525.19	2058.97	1499.19	2170.11	2357.34	2522.12	1756.67	1295.59
MW0154266	Nanchangmycin	C47H78O14.Na	936.5372	889.5289	0.7601	3.7209	65101-87-3	--	C12047	--	86278937	Lipids and lipid-like molecules	Fatty Acyls	3404.38	5194.17	4382.79	4399.44	5045.65	4345.11	16626.03	10364.12	1296.35	7311.27	15678.19	16822.59
MW0014678	5a-Cholesta-7,24-dien-3b-ol	C27H44O	452.3061	384.3392	0.6005	8.3204	651-54-7	HMDB0006842	C05439	--	440670	Lipids and lipid-like molecules	Steroids and steroid derivatives	2899.79	4112.46	5196.07	2069.69	2845.32	3285.61	1816.4	2209.66	1686.39	3585.88	2993.2	2024.08
MW0014296	3β-Allotetrahydrocortisol	C21H34O5	413.2547	366.2406	0.5729	7.6469	651-43-4	HMDB0000314	--	--	12444612	Lipids and lipid-like molecules	Steroids and steroid derivatives	12890.39	11002.79	15075.96	10244.94	9773.81	11198.72	11242.6	11498.66	1577.93	9997.47	7145.81	11689.11
MW0110721	2-Chloro-N-((2E)-6-methyl-4,5,6,7-tetrahydro-1,3-benzothiazol-2(3H)-ylidene)acetamide	C10H13ClN2OS	209.0298	244.0437	0.6458	13.732000000000001	650592-73-7	--	--	--	3368326	Organic nitrogen compounds	Organonitrogen compounds	20452.28	3528.28	3297.07	4134.42	4578.37	3080.34	2027.94	5281.45	4076.72	2908.52	2698.45	3429.05
MW0016101	beta-Citraurin;3-Hydroxy-beta-apo-8'-carotenal	C30H40O2	415.3048	1324.9409	0.5502	11.19	650-69-1	HMDB0035091	C20894	--	9845703	Lipids and lipid-like molecules	Prenol lipids	3436.97	1630.53	4548.82	2623.39	3301.9	2218.71	3633.08	2329.4	968.27	3541.68	4514.6	3352.01
MW0006244	Benzoic acid	C7H6O2	105.0335	122.0368	0.8042	11.7787	65-85-0	HMDB0001870	C00180	--	243	Benzenoids	Benzene and substituted derivatives	144622.07	175613.9	112539.86	96431.65	160736.71	120466.3	191205.76	142862.09	135650.11	185867.1	75630.7	141029.69
MEDN0243	Pyridoxine	C8H11NO3	233.0923	169.0739	0.5694	2.0127	65-23-6	HMDB0000239	C00314	--	1054	CoEnzyme and vitamins	CoEnzyme and vitamins	2653.88	5389.56	4351.21	4753.06	6634.85	4755.68	2428.0	2724.44	2810.64	3033.42	3727.24	2476.69
MW0108414	N-(2-Phosphate-1R-methylethyl)-5Z,8Z,11Z,14Z-eicosatetraenamide	C23H40NO5P	464.24800000000005	441.2644	0.5394	2.424	649569-33-5	--	--	44887	35026345	Organic acids and derivatives	Organic phosphoric acids and derivatives	3172.88	5112.26	5427.21	2580.71	5559.19	5677.43	3755.96	4575.95	3134.17	3443.3	4067.11	4373.54
MW0126915	Urapidil hydrochloride	C20H29N5O3	388.2337	387.227	0.7475	5.426	64887-14-5	--	D08662	--	167980	--	--	23010.04	24266.28	22012.26	18880.07	20585.88	24299.46	23384.79	20905.79	2694.99	23628.68	30573.02	22829.86
MW0147716	Coenzyme F420;Oxidized coenzyme F420	C29H36N5O18P	796.1699	773.1793	0.5988	0.6369	64885-97-8	--	C00876	--	123996	Organic acids and derivatives	Carboxylic acids and derivatives	3161.77	305.02	449.48	989.85	947.02	863.5	2121.74	993.22	1496.6	2698.04	1371.04	1533.72
MW0063385	Rubusoside	C32H50O13	706.3401	642.3251	0.8623	6.2486	64849-39-4	--	--	85002	24721373	Lipids and lipid-like molecules	Prenol lipids	14363.07	10727.64	14170.96	9586.62	11830.13	13434.21	10563.11	9296.5	8537.48	12255.95	12111.5	11094.04
MW0006800	Dicyclohexylphenylphosphine	C18H27P	316.2199	274.185	0.5676	7.2926	6476-37-5	--	--	--	80970	Benzenoids	Benzene and substituted derivatives	574.41	3232.48	3361.34	731.62	3532.14	3451.86	1147.02	1364.5	435.65	1577.19	1835.18	1420.47
MW0126868	Triclopyr-2-butoxy ethyl ester	C13H16Cl3NO4	711.0332	355.0145	0.5217	0.5547	64700-56-7	--	--	--	47455	Organoheterocyclic compounds	Pyridines and derivatives	28546.62	24622.11	28397.87	31028.79	27424.11	27271.28	27275.0	23042.1	25480.63	21815.57	27044.14	27112.09
MW0009979	Triflumuron	C15H10ClF3N2O3	323.0191	358.0332	0.6367	4.0169999999999995	64628-44-0	--	C18615	--	47445	Benzenoids	Benzene and substituted derivatives	4586.26	4017.67	2422.06	3068.33	1647.84	2652.6	989.66	1172.06	438.73	701.45	1083.46	648.42
MEDN1467	Thromboxane B1	C20H36O6	373.2594	372.2512	0.6016	6.6732	64626-32-0	-	-	--	71668258	Oxidized lipid	Oxidized lipid	1154346.36	1689800.23	1691977.68	1081270.82	1629628.21	1726434.9	1039011.55	1435626.01	934570.96	1479700.14	1500617.34	1100302.55
MW0141665	19(R)-hydroxy-PGE1	C20H34O6	371.24300000000005	370.2355	0.6726	6.435	64625-55-4	--	--	36196	5283115	Lipids and lipid-like molecules	Fatty Acyls	192980.62	201505.24	208334.18	192982.84	202362.49	204660.77	216744.57	195883.98	148419.26	214792.45	265261.23	223460.59
MW0012731	19-Hydroxy-PGE2	C20H32O6	391.2088	368.2199	0.772	6.3493	64625-54-3	HMDB0001908	--	3819	5283038	Lipids and lipid-like molecules	Fatty Acyls	27269.66	29127.37	45064.06	59142.81	104419.81	37028.03	23630.39	44427.66	37971.91	66095.4	59269.87	45706.45
MW0141662	19(R)-hydroxy PGF2	C20H34O6	779.4639999999999	370.2355	0.5853	8.2771	64625-53-2	--	--	36117	5283047	Lipids and lipid-like molecules	Fatty Acyls	2253.17	2835.03	2051.05	1975.31	2402.78	3868.71	2673.01	2454.65	626.26	3551.61	3198.42	3653.08
MW0055346	Nonadecanoic acid	C19H38O2	299.2945	298.2872	0.6495	13.296	646-30-0	HMDB0000772	C16535	--	12591	Lipids and lipid-like molecules	Fatty Acyls	5382.44	4935.9	9314.41	12967.02	5520.11	8969.64	6102.47	4339.76	4592.69	6676.32	6638.39	3525.51
MW0014536	4-Methylvaleric acid	C6H12O2	81.0699	116.0837	0.6619	11.7969	646-07-1	HMDB0000689	C21399	4191	12587	Lipids and lipid-like molecules	Fatty Acyls	154245.96	159165.47	215431.95	240776.91	234450.33	222341.0	278218.26	144225.81	112293.56	179491.68	118063.16	187603.73
MW0109828	Tfa-VAL-TYR-VAL-OH	C21H28F3N3O6	493.2268	475.19300000000004	0.6451	0.6287	64577-63-5	--	--	44312	40785040	Organic acids and derivatives	Carboxylic acids and derivatives	1650.4	1485.68	1535.47	1635.57	860.68	1762.87	2717.37	1161.39	2740.42	2406.42	2250.81	2334.38
MW0139730	Sofalcone	C27H30O6	473.1922	450.2042	0.5698	5.426	64506-49-6	HMDB0042013	D01956	--	5282219	Phenylpropanoids and polyketides	Linear 1,3-diarylpropanoids	19052.91	14382.55	15310.0	30556.18	6674.43	17514.93	17329.47	14801.66	17447.58	8224.73	15347.19	18664.56
MW0122843	Ammelide	C3H4N4O2	129.0396	128.0334	0.565	0.5625	645-93-2	--	C08734	--	12584	Organoheterocyclic compounds	Triazines	8269.91	8539.88	10616.21	8850.48	6527.67	6795.64	7833.82	8962.52	8476.77	7910.04	9787.42	7559.69
ZINC1680400	2-Ethyl-3-propylacrolein	C8H14O	241.0741	126.199	0.6437	10.6816	645-62-5	-	-	--	5354264	Organic oxygen compounds	Organooxygen compounds	30.2	0.6	0.66	0.22	1.5	0.14	0.38	0.32	19.74	0.25	2.54	1.73
MEDP1600	4-Propylphenol	C9H12O	119.0853	136.0888	0.6658	3.6069999999999998	645-56-7	HMDB0032625	C14311	--	12580	Benzene and substituted derivatives	Benzene and substituted derivatives	14296.09	14749.47	11919.83	16298.63	17330.9	15911.14	17132.05	13029.05	1022.03	18053.46	16837.04	15701.43
MW0106042	Bis(4-nitrophenyl) hydrogen phosphate	C12H9N2O8P	341.0181	340.0097	0.6511	11.8019	645-15-8	--	C03779	--	255	Organic acids and derivatives	Organic phosphoric acids and derivatives	160261.26	172168.32	177868.43	123468.12	260186.73	235741.14	163724.28	115543.11	202738.49	177743.94	215018.94	265136.72
MW0110905	Altretamine	C9H18N6	228.1958	210.1593	0.5754	11.3661	645-05-6	HMDB0014631	D02841	--	2123	Organic nitrogen compounds	Organonitrogen compounds	16848.11	7587.69	7032.5	10110.03	8665.41	7184.12	9922.44	19138.74	8560.35	8245.75	12498.89	14398.33
MW0013627	2-Pentadecenal	C15H28O	271.2268	224.21400000000003	0.5808	6.065	64462-00-6	--	--	265104	149211	--	--	27568.12	25406.34	24071.16	29552.0	26137.52	23808.01	29746.04	32794.89	71882.36	34133.59	39114.64	32164.28
MW0169098	DULCOSIDE A	C38H60O17	852.3998	788.3831	0.6133	7.7351	64432-06-0	HMDB0036708	--	84958	72941582	--	--	1977.21	1187.78	1612.22	2034.42	1930.56	869.64	2980.68	3150.38	398.18	5277.38	3745.47	4158.72
MW0106490	DL-2-Aminocaprylic acid	C8H17NO2	177.1636	159.1259	0.5564	11.8061	644-90-6	HMDB0000991	--	5923	69522	--	--	138047.7	156812.45	244935.27	426606.92	220383.51	343053.5	267763.12	328904.68	306039.34	206737.16	365475.86	231070.45
MW0003365	2-Propylphenol	C9H12O	183.0993	136.0888	0.5804	3.8871	644-35-9	HMDB0032624	--	--	12570	Benzenoids	Benzene and substituted derivatives	131651.08	168374.66	167588.07	159818.55	192969.3	159994.46	171427.75	173173.2	170905.17	275238.63	181365.76	174560.77
MW0108363	N-(13-Methyltetradecyl)acetamide	C17H35NO	316.2846	269.2719	0.6429	11.3852	64317-66-4	HMDB0040940	C17515	--	47346	Organic acids and derivatives	Carboxylic acids and derivatives	15964.79	6189.12	15519.93	8192.38	9149.3	6719.8	12213.33	19173.49	11867.08	10541.48	11923.52	10691.35
MW0156578	Scutianine F	C38H45N5O5	690.3057	651.3421	0.6331	4.8356	64309-19-9	--	C10014	--	5281596	Organic acids and derivatives	Carboxylic acids and derivatives	9796.59	9210.94	9595.82	9277.9	8874.58	7896.65	9819.22	7931.32	7850.13	8559.75	7843.58	7277.34
MW0145036	Ammoresinol	C24H30O4	803.3915	382.2144	0.6302	7.779	643-57-2	--	C09056	--	54712597	Lipids and lipid-like molecules	Prenol lipids	4483.51	2734.14	4447.29	3410.89	3752.7	4243.14	3547.54	3683.36	3833.4	2871.95	3670.09	3772.53
MW0138315	Gonyautoxin 5;Gonyautoxin V;GTX5;Toxin B1	C10H17N7O7S	362.0877	379.091	0.6493	1.1978	64296-25-9	HMDB0033513	C20018	--	49789073	Phenylpropanoids and polyketides	Saxitoxins, gonyautoxins, and derivatives	3636.57	2767.3	4231.94	3702.34	3631.01	3486.23	3948.21	4093.36	4766.12	3436.13	3050.39	2559.94
MW0000127	Anatoxin A	C10H15NO	166.1223	165.1154	0.6594	4.0555	64285-06-9	--	C10841	--	431734	Alkaloids and derivatives	Anatoxins	233.18	79.87	1029.24	691.4	467.76	1014.93	5031.88	3653.03	3387.29	6173.42	2611.01	5583.11
MW0011333	(3β,5α)-4,4-Dimethylcholesta-8,14,24-trien-3-ol	C29H46O	457.3709	410.3549	0.8086	10.2374	64284-64-6	HMDB0001023	C11455	--	443212	Lipids and lipid-like molecules	Steroids and steroid derivatives	15940.43	18067.8	22019.57	7907.04	16590.8	13172.42	10421.68	13426.85	11684.34	5832.12	9437.32	9741.14
MW0138556	Isosophoranone	C26H30O6	515.1238	438.2042	0.6206	8.4974	64280-18-8	--	--	--	10478290	Phenylpropanoids and polyketides	Isoflavonoids	1947.62	2379.97	2927.12	3646.73	2855.2	2320.71	2986.53	2108.15	3311.51	2752.17	1643.34	3027.15
MW0006051	Anilofos	C13H19ClNO3PS2	757.0369	367.0232	0.6052	0.5538	64249-01-0	--	C18394	72203	91687	Benzenoids	Benzene and substituted derivatives	2104.03	2057.33	2395.22	1629.93	1723.43	1885.76	1378.52	1910.7	1764.55	1699.92	689.93	1186.51
MW0122955	Atracurium	C53H72N2O12	951.4984	928.5085	0.6303	6.0501	64228-79-1	HMDB0014870	C07548	--	47319	Organoheterocyclic compounds	Isoquinolines and derivatives	1593.23	1277.45	804.15	1668.43	1402.05	809.65	818.19	1883.84	1617.14	2552.56	2076.66	2188.51
MEDP1616	Pro-Ala	C8H14N2O3	233.1125	186.1004	0.611	6.4943	6422-36-2	-	-	--	6347578	Amino acid and Its metabolomics	Amino acid and Its metabolomics	69620.94	67610.6	70237.11	75077.37	75385.61	74956.6	86940.77	79115.39	83614.59	90187.58	87591.98	88111.37
MW0155618	Plaunotol;18-Hydroxygeranylgeraniol	C20H34O2	375.2508	306.2559	0.9663	9.9722	64218-02-6	--	C13273	--	5282197	Lipids and lipid-like molecules	Prenol lipids	11321.43	27063.62	16072.88	13601.2	29827.42	22388.34	11681.05	11654.34	12203.58	13199.95	14425.79	14019.57
MW0149513	Geldanamycin Analog	C28H39N3O8	584.2368	545.2737	0.6461	0.6286	64202-81-9	--	--	96314	9893658	Phenylpropanoids and polyketides	Macrolactams	3866.81	1192.5	3144.8	3314.05	3038.6	2614.68	9698.76	7716.75	8210.16	6469.66	8478.3	5382.62
MW0123088	Benzydamine	C19H23N3O	274.16700000000003	309.1841	0.5612	2.2915	642-72-8	--	D07516	--	12555	Organoheterocyclic compounds	Benzopyrazoles	2525.7	2018.39	268.02	6000.17	2503.12	1667.38	2898.09	3198.88	3266.07	4296.41	4250.89	3753.4
MW0015111	7-(6-Oct-1-enyl-2,3-diazabicyclo[2.2.1]hept-2-en-5-yl)hept-5-enoic acid	C20H32N2O2	396.2587	332.2464	0.555	5.1297	64192-56-9	--	--	45682	53394200	--	--	22470.51	22635.99	28389.86	34607.17	42229.34	24230.84	30791.11	57527.0	31608.21	42635.04	69127.42	32699.97
MW0009088	Nilotinib	C28H22F3N7O	571.2179	529.1838	0.6354	2.907	641571-10-0	HMDB0015595	D08953	--	644241	Benzenoids	Benzene and substituted derivatives	5892.6	2776.03	4339.43	3694.86	1243.52	3227.74	98.56	74.08	224.89	178.75	350.18	79.76
MW0142785	3alpha,17alpha-Dihydroxy-5beta-pregnane-11,20-dione;17alpha-Hydroxy-11-ketopregnanolone	C21H32O4	697.4699	348.2301	0.5468	7.3959	641-78-1	--	C14598	--	101817	Lipids and lipid-like molecules	Steroids and steroid derivatives	6798.39	33168.22	21764.34	18861.56	33400.03	24282.77	941.93	2151.7	363.82	6808.52	3482.08	1931.03
MEDP1655	21-Deoxycortisol	C21H30O4	393.2249	346.2144	0.7209	6.421	641-77-0	HMDB0004030	-	--	92827	Hormones and hormone related compunds	Hormones and hormone related compunds	81227.65	86306.95	90760.88	85925.89	92768.14	90481.58	102267.61	93874.13	82852.25	109655.58	138124.09	116594.75
MW0112967	4-(Methylnitrosamino)-1-(3-pyridyl)-1-butanone	C10H13N3O2	274.05400000000003	207.1008	0.6477	2.5772	64091-91-4	HMDB0011603	C16453	62378	47289	Organic oxygen compounds	Organooxygen compounds	2358.96	1558.09	2373.61	2289.91	2659.97	2266.74	3079.6	2886.05	3270.64	2863.38	3425.22	3035.55
MW0141457	16,16-Dimethylprostaglandin D2	C22H36O5	363.2509	380.2563	0.7437	10.8588	64072-59-9	--	--	36123	5283053	Lipids and lipid-like molecules	Fatty Acyls	5099.84	6746.41	9853.66	3501.37	5136.25	5751.1	4905.25	4166.32	4465.81	5609.16	5726.36	4886.12
MW0015143	7-[2-(3-Hydroxyoctyl)-5-oxopyrrolidin-1-YL]heptanoic acid	C19H35NO4	727.4665	341.2566	0.6589	6.0356	64054-40-6	--	--	45720	44269516	Lipids and lipid-like molecules	Fatty Acyls	1578.74	1705.16	1957.93	1907.34	2485.4	1685.26	3096.67	4071.84	2562.41	4050.26	2533.62	2934.38
MW0005150	4-Isothiocyanato-N-(2-pyrimidinyl)benzenesulfonamide	C11H8N4O2S2	607.0055	292.0089	0.5718	0.5544	64047-46-7	--	--	--	46699	Benzenoids	Benzene and substituted derivatives	5678.23	3405.61	6839.16	3363.25	5398.05	5466.59	4979.89	4937.12	4614.76	3524.49	4328.94	5049.63
MEDL02729	Traumatic acid	C12H20O4	274.1111	228.1362	0.9833	5.9466	6402-36-4	HMDB0000933	C16308	--	5283028	Lipids	Free fatty acids	2185.36	2278.61	2490.33	2811.03	2413.44	2754.85	2461.8	2746.08	2688.41	3121.41	3608.3	3144.97
MW0104245	1-Ethyl-N4,N5-dimethyl-1H-imidazole-4,5-dicarboxamide	C9H14N4O2	324.9866	210.1117	0.6428	0.6143	64-99-3	--	--	--	6168	Organic acids and derivatives	Carboxylic acids and derivatives	5799.73	8253.42	6297.96	7885.36	5209.83	5290.72	4189.69	4101.38	1469.77	3336.59	3693.94	2776.63
MW0009934	Tolbutamide	C12H18N2O3S	417.1549	270.1038	0.6811	3.6209	64-77-7	HMDB0015256	C07148	--	5505	Benzenoids	Benzene and substituted derivatives	4304.71	4529.63	4219.98	4967.54	2966.02	4330.3	1915.75	2631.14	3703.77	2392.46	2703.68	1613.04
MW0114413	Ethanol	C2H6O	88.0755	46.0419	0.6338	13.4585	64-17-5	HMDB0000108	C00469	--	702	Organic oxygen compounds	Organooxygen compounds	17229.09	2614.81	15703.45	18905.53	20157.29	19378.91	62636.46	20700.63	16217.64	11914.39	20961.84	20073.52
MEDP0129	Phenethylamine	C8H11N	166.06099999999998	121.0891	0.8109	2.3453	64-04-0	HMDB0012275	C05332	--	1001	Alcohol and amines	Amines	3509.68	4907.83	6291.06	3656.16	4425.42	5094.28	4194.31	4017.22	4367.13	4557.88	4785.06	3845.84
MW0015923	Artemisinin	C15H22O5	283.1519	282.1467	0.708	4.6123	63968-64-9	--	C09538	532	68827	Lipids and lipid-like molecules	Prenol lipids	6564.54	2514.55	4492.99	713.02	814.17	6094.81	553.96	503.24	119.66	605.3	667.52	704.84
MW0114293	Dipyridamole mono-O-β-D-glucuronide	C30H48N8O10	722.3812	680.3493	0.5683	6.0512	63912-02-7	--	--	--	92132302	Organic oxygen compounds	Organooxygen compounds	4819.29	4367.58	3936.94	4884.08	4950.68	4140.1	4941.53	4827.04	4696.27	5038.09	4869.38	5447.38
MW0158073	Triphenyltin chloride	C18H15ClSn	386.9957	385.9884	0.6472	0.5547	639-58-7	--	C14413	--	12540	Benzenoids	Benzene and substituted derivatives	13091.95	10598.19	13280.41	12887.52	10135.51	14256.88	7713.61	8025.4	10841.43	8093.15	10606.47	8493.88
MW0004665	4-Amino-N-methyl-N-phenylbenzenesulfonamide	C13H14N2O2S	542.1892	262.0776	0.6463	0.6137	63826-12-0	--	--	--	308590	Benzenoids	Benzene and substituted derivatives	5910.18	6625.89	5880.78	6213.2	5768.89	5829.03	9740.97	10767.14	10782.32	9508.5	12105.24	12888.69
MW0005240	4-Methyl-N-(2-propyl-2H-tetraazol-5-yl)benzamide	C12H15N5O	268.1222	245.1277	0.5793	6.5094	638145-82-1	--	--	--	1085347	Benzenoids	Benzene and substituted derivatives	6176.74	6694.35	7563.42	7222.33	7075.27	7163.51	8734.89	7641.14	7964.08	8614.2	7600.28	9487.16
MW0055436	Octadecanal	C18H36O	157.1221	268.2766	0.6113	13.124	638-66-4	HMDB0002384	C01838	--	12533	Lipids and lipid-like molecules	Fatty Acyls	3868.05	807.3	2698.66	2704.46	6463.4	2947.01	2922.89	602.63	157.63	2585.6	2970.13	2634.67
MW0102935	Tridecanoic acid	C13H26O2	215.2005	214.1933	0.5924	11.808	638-53-9	HMDB0000910	C17076	4204	12530	Lipids and lipid-like molecules	Fatty Acyls	40557.6	48268.43	45243.36	54043.71	35905.42	51818.37	46596.99	32539.87	40516.03	27636.33	31694.63	31370.94
MW0011579	(R)-10-Hydroxystearate	C18H36O3	385.2413	300.2664	0.5464	7.5739	638-26-6	--	C03195	--	12520	Lipids and lipid-like molecules	Fatty Acyls	4488.18	1043.75	1150.49	3549.3	506.25	798.16	99.3	262.0	42.6	64.47	610.12	79.03
MW0007794	Methylisoeugenol	C11H14O2	225.1096	178.0994	0.7519	5.5301	6379-72-2	HMDB0041553	C10478	68351	637776	Benzenoids	Benzene and substituted derivatives	15831.38	11142.62	8689.79	29437.11	26647.48	10135.45	15323.64	16756.25	16223.27	33186.39	18679.53	18459.76
MW0004154	3-Nitrophenylhydrazine	C6H7N3O2	171.0931	153.0538	0.5345	2.8067	636-95-3	--	--	85168	3940977	Benzenoids	Benzene and substituted derivatives	5321.41	10338.12	7919.89	4071.92	3946.92	5771.24	2982.03	2841.38	3186.41	1958.76	3126.76	2793.52
MW0141708	1-Cyclohexenecarboxylic acid;Cyclohex-1-enecarboxylic acid;1-Cyclohexene-1-carboxylic acid	C7H10O2	144.1022	126.0681	0.6326	0.8205	636-82-8	--	C12101	--	69470	Organic acids and derivatives	Carboxylic acids and derivatives	325.08	3108.33	2858.78	2183.17	5451.48	2322.96	498.23	299.03	277.58	298.16	231.34	178.46
MEDN0074	γ-L-Glutamate-Cysteine	C8H14N2O5S	297.0698	250.0623	0.6347	0.7191	636-58-8	HMDB01049	C00669	--	--	Amino Acid metabolomics	Amino Acid metabolomics	278375.21	278894.92	302223.7	356447.41	338942.09	309504.85	382160.81	359525.4	333057.56	354030.26	386992.66	351713.7
MW0147672	Clitidine;Chrytidine	C11H14N2O6	253.0888	270.0852	0.6804	6.2979	63592-84-7	--	C19977	--	182378	Organic oxygen compounds	Organooxygen compounds	2082.93	2709.93	3023.39	1546.57	2436.26	1929.99	2073.12	2365.78	2451.38	1495.45	2143.29	2014.52
MW0007828	Modafinil acid	C15H14O3S	292.1003	274.0664	0.647	4.3278	63547-24-0	HMDB0061039	--	--	3085267	Benzenoids	Benzene and substituted derivatives	20127.46	11680.04	11319.98	12249.78	6540.93	12426.96	5115.18	4992.76	4434.41	4236.48	5038.44	4145.68
MW0137814	Cyanidin 3-O-beta-D-sambubioside	C26H29O15	582.1607	581.1506	0.6585	2.8360000000000003	63535-17-1	HMDB0037976	C20490	--	6602304	Phenylpropanoids and polyketides	Flavonoids	14454.43	19257.89	16835.33	25719.06	30227.53	17513.83	43209.81	37308.64	37431.36	36397.45	39011.87	43926.29
MW0103798	Pyridine, 2-hydrazinyl-5-nitro-	C5H6N4O2	137.0457	154.0491	0.6434	0.8552	6343-98-2	--	--	--	4031931	Organic 1,3-dipolar compounds	Allyl-type 1,3-dipolar organic compounds	51616.93	14834.97	40520.5	44140.75	25241.09	32253.37	39084.84	32152.3	39393.32	36740.5	36314.25	58207.6
MW0008628	N-[1,1'-Biphenyl]-4-yl-2-naphthalenamine	C22H17N	337.1701	295.1361	0.6369	0.6436	6336-92-1	--	--	--	236881	Benzenoids	Benzene and substituted derivatives	12433.67	15394.94	18275.42	9461.32	10483.16	15352.13	17546.2	16944.9	17280.86	17157.79	17999.08	15999.59
MW0148485	Dihydro Isorescinnamine	C35H44N2O9	654.3321	636.3047	0.731	11.022	6335-49-5	--	--	85095	232430	Alkaloids and derivatives	Yohimbine alkaloids	1027055.45	504298.8	694744.24	567471.85	626817.78	719626.68	945243.96	729247.42	864178.15	823695.29	1070489.32	1040419.0
MW0008856	N-Benzoyl(carboxymethyl)cysteine	C12H13NO5S	584.1369	283.0514	0.6454	0.659	6332-29-2	--	--	--	231318	Benzenoids	Benzene and substituted derivatives	4679.97	3305.44	5178.81	1728.09	2911.39	2908.88	3081.34	6120.53	4540.46	2941.57	4500.21	5474.95
MW0118927	3-(1,3-Dioxo-1,3-dihydro-2H-isoindol-2-yl)-3-(3-nitrophenyl)propanoic acid	C17H12N2O6	305.0561	340.0695	0.6137	1.2667	6329-28-8	--	--	--	238863	Organoheterocyclic compounds	Isoindoles and derivatives	1891.67	2367.42	1014.09	2407.14	1290.72	645.99	2656.44	1419.7	2153.65	1904.67	1259.4	2117.42
MW0009217	Nuarimol	C17H12ClFN2O	378.07800000000003	314.0622	0.6459999999999999	9.1022	63284-71-9	--	C11185	--	91683	Benzenoids	Benzene and substituted derivatives	4868.35	5939.82	5725.89	4328.44	4631.63	5220.23	5076.7	4671.06	4644.82	6883.27	6500.31	5586.58
MW0106423	Diethyl 2-(formylamino)malonate	C8H13NO5	204.0867	203.0794	0.649	3.4012	6326-44-9	--	--	--	80617	Organic acids and derivatives	Carboxylic acids and derivatives	9028.01	10276.19	10636.69	11627.06	11031.26	10122.64	11844.25	11975.03	11099.37	12188.83	14920.55	11415.69
MW0157272	Succinylproline;Succinyl-L-proline	C9H13NO5	238.0708	215.0794	0.7139	2.4639	63250-32-8	--	C11711	--	194156	Organic acids and derivatives	Carboxylic acids and derivatives	7131.13	2938.67	2757.84	6821.82	3237.87	2841.32	2697.59	2789.63	2748.74	2776.82	2236.35	2588.7
MEDN0610	2,3-Dinor-TXB2	C18H30O6	325.2007	342.2042	0.5609	5.1297	63250-09-9	HMDB0002904	-	--	5283138	FA	FFA	21802.83	28876.22	29268.22	21186.43	26081.77	29086.76	27297.1	27659.8	32449.24	32252.29	29668.6	27460.99
MW0153312	Magenta;Fuchsin;Rosaniline hydrochloride	C20H19N3.HCl	692.3027	337.1346	0.6316	4.8357	632-99-5	--	C19252	--	12447	--	--	4793.48	4787.41	5014.39	4408.87	4319.86	4219.59	3761.06	3867.01	3669.18	2560.68	3794.48	3302.51
MW0005908	9,10-Diphenyl-9,10-dihydro-9,10-anthracenediol	C26H20O2	202.0565	364.1463	0.7098	0.5653	6318-17-8	--	--	--	94976	Benzenoids	Anthracenes	4579.15	3737.96	5072.59	4188.97	3976.41	4406.61	3836.97	3788.36	3176.92	3195.32	4625.52	3142.94
MW0055408	N-stearoyl taurine	C20H41NO4S	438.2901	391.2756	0.5373	11.1909	63155-80-6	--	--	44909	168274	Lipids and lipid-like molecules	Fatty Acyls	3894.6	6533.84	3211.34	7267.09	4592.56	2471.88	4392.19	8888.43	9870.44	3888.49	3515.19	3390.93
MW0004811	4-Chloro-2-iodoaniline	C6H5ClIN	528.8177	252.9155	0.5079	3.4617	63069-48-7	--	--	--	2757615	Benzenoids	Benzene and substituted derivatives	3720.28	7554.18	7869.23	2866.72	5888.49	7633.53	502.9	789.04	159.83	830.59	1641.48	531.23
MW0116898	1-Benzyl-5-methyl-2,4(1H,3H)-pyrimidinedione	C12H12N2O2	450.215	216.0899	0.5625	5.0707	6306-73-6	--	--	--	237953	Organoheterocyclic compounds	Diazines	25339.98	26148.99	25585.2	26024.64	25611.48	28332.75	28323.2	30070.06	32159.12	33343.73	30026.29	33565.67
MW0146823	Bombykal;(Z,E)-10,12-Hexadecadienal	C16H28O	281.1725	236.21400000000003	0.7676	5.8007	63024-98-6	--	C20128	--	10922550	Lipids and lipid-like molecules	Fatty Acyls	82255.41	74896.64	65724.72	94423.91	88746.08	58379.63	97946.49	103149.36	91351.38	105148.3	129246.33	93592.62
MW0010420	Tritriacontane	C33H68	968.0312	464.5321	0.5339	0.5527	630-05-7	--	C08393	66937	12411	Hydrocarbons	Saturated hydrocarbons	4492.35	1818.58	3586.78	2023.06	2218.49	5314.59	198.88	1702.97	1799.84	1504.85	3330.1	2297.57
ZINC6920419	Hexacosane	C26H54	772.4002	366.718	0.6091	4.7614	630-01-3	-	-	--	12407	Hydrocarbons	Saturated hydrocarbons	2168.48	1379.91	1534.04	1761.22	2163.06	1689.07	1957.98	2030.17	1503.0	1641.58	1570.65	2363.3
MEDL02347	L-Phenylalanine	C9H11NO2	207.1128	165.0705	0.9184	1.8706	63-91-2	HMDB0000159	C00079	--	6140	Amino acids and derivatives	Amino acids and derivatives	13351.69	9436.56	10407.18	11405.22	8377.09	10488.83	10189.97	11414.11	13085.11	11976.2	13827.93	11177.14
MW0056883	PC(16:0/16:0)	C40H75NO9	778.5374	713.5442	0.8503	11.1531	63-89-8	HMDB0000564	D03585	--	452110	Lipids and lipid-like molecules	Glycerophospholipids	34177.07	181.13	1122.11	5337.61	14830.43	20096.33	30.86	20667.87	33882.05	64636.52	30208.5	87057.01
MEDP0020	L-Methionine	C5H11NO2S	191.0846	149.05100000000002	0.6326	3.2585	63-68-3	HMDB0000696	C00073	--	6137	Amino acid and Its metabolomics	Amino acids	1760.54	1086.25	564.06	1472.79	440.62	987.1	2072.72	2318.11	1642.47	2499.44	1564.76	2013.96
MW0103501	CMP; Cytidine-5'-monophosphate	C9H14N3O8P	368.0225	323.0519	0.6008	0.5547	63-37-6	HMDB0000095	C00055	--	6131	Nucleosides, nucleotides, and analogues	Pyrimidine nucleotides	114695.4	114310.41	125599.95	119184.07	127099.23	120549.26	111833.26	101008.78	108984.5	100813.03	117117.35	106556.4
MW0126589	Staurosporine	C28H26N4O3	467.2126	466.2005	0.5451	3.0232	62996-74-1	--	C02079	3307	44259	Organoheterocyclic compounds	Indoles and derivatives	7396.77	11878.71	21698.18	1338.19	7485.78	10707.19	1359.54	1121.12	739.54	1221.82	986.19	1528.65
MW0147244	Cassinine	C44H51NO17	866.3229	865.3157	0.6448	0.8268	62948-58-7	--	C09934	--	442516	Lipids and lipid-like molecules	Prenol lipids	11524.23	12014.49	10159.53	13665.84	22741.34	13159.8	2727.88	6174.13	6858.52	4514.59	5069.57	6578.96
ZINC1883067	Trinitrophenol	C6H3N3O7	476.2421	229.104	0.6383	2.3596	6293-52-3	-	-	--	6954	Benzenoids	Phenols	1007.89	4532.68	4252.47	618.68	4927.73	4843.9	3302.14	3508.03	4294.17	3474.67	3001.49	3458.54
MW0149121	Falaconitine	C34H47NO10	693.3358	629.32	0.6491	3.4496	62926-57-2	--	C08683	--	441732	Benzenoids	Benzene and substituted derivatives	29520.92	30228.63	31654.81	47763.13	44562.46	29934.33	92005.14	85143.57	65555.52	48117.91	79628.73	94404.16
MW0007177	Flumetralin	C16H12ClF4N3O4	497.9645	421.0452	0.6419	0.5538	62924-70-3	--	C18849	--	62210	Benzenoids	Benzene and substituted derivatives	28770.57	33852.97	37069.39	26918.49	36690.66	33104.28	33859.83	32147.07	29925.99	33131.46	33159.6	26696.61
ZINC6920415	Docosane	C22H46	660.1841	310.61	0.6062	3.1183	629-97-0	-	-	--	12405	Hydrocarbons	Saturated hydrocarbons	5753.17	4447.97	4701.02	4249.31	2656.96	4804.2	1247.33	872.05	468.07	1352.85	1428.43	775.01
ZINC32840992	Eicosanol	C20H42O	337.5186	298.555	0.6157	0.5551	629-96-9	HMDB0011619	-	--	12404	Lipids and lipid-like molecules	Fatty Acyls	1569.03	1379.43	976.33	1966.38	1402.43	1102.24	1604.15	1769.81	1434.63	1501.15	2094.31	1710.76
MW0053898	Hexadecanal	C16H32O	283.2827	240.2453	0.981	10.9918	629-80-1	HMDB0001551	C00517	--	984	Lipids and lipid-like molecules	Fatty Acyls	68188.61	44723.96	88559.41	66434.27	35468.51	49835.14	40005.21	197365.73	143988.52	147959.26	49222.13	109395.17
MEDP0513	Hexadecanamide	C16H33NO	256.2636	255.2562	0.8726	10.765999999999998	629-54-9	HMDB0012273	-	--	69421	Alcohol and amines	Amines	36426.64	26271.98	54090.58	44138.25	24466.86	32008.86	25013.14	127110.9	80300.15	83762.53	30861.91	71933.37
MW0011966	1,8-Octanediol	C8H18O2	315.243	146.1307	0.5899	9.9723	629-41-4	--	C14218	--	69420	Lipids and lipid-like molecules	Fatty Acyls	2263.2	3317.81	4697.35	1579.45	3109.51	2978.28	1817.3	1831.86	1802.04	2286.71	2222.35	2484.75
MW0141455	16,16-dimethyl Prostaglandin E2 p-(p-acetamidobenzamido) phenyl ester	C37H48N2O7	615.3423	632.3462	0.8724	5.1307	62873-55-6	--	--	45607	6449809	Lipids and lipid-like molecules	Fatty Acyls	9653.32	10776.63	9804.97	7764.43	8857.32	9719.61	10810.07	8888.94	9546.9	14882.21	14371.47	12309.6
MW0000264	Fumigaclavine C	C23H30N2O2	430.2463	366.2307	0.6327	3.6066	62867-47-4	--	C20438	--	10044441	Alkaloids and derivatives	Ergoline and derivatives	5056.45	7161.94	5806.52	5363.73	6554.66	5611.65	6352.9	6384.84	5747.47	6379.8	6926.47	6076.04
MW0004136	3-Methyl-N-(2-naphthyl)butanamide	C15H17NO	274.1435	227.13099999999997	0.5555	5.9767	6286-27-7	--	--	96371	222943	Benzenoids	Naphthalenes	10739.75	12930.36	11536.79	28462.59	27289.93	13694.86	24921.99	23053.74	21055.01	22354.0	28907.59	23273.14
MW0002847	2'-Chloro-2-hydroxy-5-methylbenzophenone	C14H11ClO2	510.1233	246.0448	0.6457	0.8364	6280-52-0	--	--	--	223480	Benzenoids	Benzene and substituted derivatives	7928.79	8489.74	9019.81	6120.38	8349.09	10873.99	8893.76	6037.9	7919.05	7668.07	6817.99	6184.25
MW0144243	Acetoxolone;Acetylglycyrrhetinic acid	C32H48O5	530.3858	512.3502	0.5555	11.4455	6277-14-1	--	C17734	--	94320	Lipids and lipid-like molecules	Prenol lipids	1280.4	1337.02	829.58	815.66	829.38	991.17	3201.0	2054.26	2715.73	991.36	2346.48	3506.26
MW0125399	N-(4-Chlorophenyl)-1,3-benzothiazol-2-amine	C13H9ClN2S	298.9802	260.0175	0.6075	0.5551	6276-78-4	--	--	--	234666	Organoheterocyclic compounds	Benzothiazoles	7309.77	5584.7	4387.65	5207.92	4288.63	5967.37	2326.41	1801.27	3641.05	4705.02	2713.15	3951.9
MW0052401	Dimethyl adipate	C8H14O4	366.2022	174.0892	0.535	3.5395	627-93-0	HMDB0041606	C14570	--	12329	Lipids and lipid-like molecules	Fatty Acyls	1016.26	560.54	1015.9	1244.51	1674.23	1124.76	986.88	1344.79	1410.28	1554.13	2201.46	1006.75
ZINC1530356	1-Buten-4-Ol	C4H8O	111.0804	72.107	0.5143	12.2901	627-27-0	HMDB0031324	-	--	69389	Organic oxygen compounds	Organooxygen compounds	5391.75	3425.66	5365.37	5548.31	2492.14	3720.9	5928.34	8595.15	13423.37	6028.07	4969.58	4635.67
MW0002495	2-[(4-Chlorophenyl)sulfonyl]-1,4-benzenediol	C12H9ClO4S	568.9893	283.991	0.6494	0.5527	6269-31-4	--	--	--	233835	Benzenoids	Benzene and substituted derivatives	7556.76	3151.87	3177.43	1932.05	2760.13	4783.12	1539.37	962.4	1064.16	2003.62	1298.88	1350.43
MW0001157	1-(4-Chlorophenyl)-2-(4-morpholinyl)ethanol	C12H16ClNO2	521.1364	241.08700000000002	0.6066	12.3211	6269-29-0	--	--	--	233837	Benzenoids	Benzene and substituted derivatives	37282.36	50201.5	45989.21	59816.45	8574.47	37935.14	47188.2	44187.9	43663.57	27947.86	55107.4	32803.74
MW0117706	2-(Hydroxymethyl)-5-methoxy-4H-pyran-4-one	C7H8O4	121.0283	156.0423	0.6475	13.7591	6269-25-6	--	--	--	234556	Organoheterocyclic compounds	Pyrans	24013.12	20147.76	18956.58	17366.79	33427.6	27472.55	13102.08	15903.73	23577.3	41426.14	34469.94	31798.25
MW0003024	2-Ethyl-N-phenylhexanamide	C14H21NO	296.0815	219.1623	0.6419	1.6506	62685-93-2	--	--	--	171552	Benzenoids	Benzene and substituted derivatives	6083.43	5294.16	6728.7	2756.42	4098.93	4035.44	2067.02	2051.81	2541.09	3826.02	2259.33	2890.86
MW0006405	Bopindolol	C23H28N2O3	403.1998	380.21	0.5611	3.8682	62658-63-3	HMDB0015696	D07537	--	44112	Benzenoids	Benzene and substituted derivatives	53030.76	71121.77	67756.5	72515.16	75047.23	70149.14	77147.31	75582.01	72998.38	81763.45	78920.7	81170.83
MW0010749	(+)-7-Isojasmonic acid	C12H18O3	257.1388	210.1256	0.6213	3.1812	62653-85-4	--	C16317	--	7251183	Lipids and lipid-like molecules	Fatty Acyls	1528.76	7267.96	8509.27	3901.59	9423.85	9432.86	1808.18	1216.16	541.02	1199.16	3004.63	1045.48
MW0117324	2-(1,3-Benzothiazol-2-yl)-4-chlorophenol	C13H8ClNOS	308.0145	261.0015	0.6322	0.5398	6265-97-0	--	--	--	233869	Organoheterocyclic compounds	Benzothiazoles	8209.46	8987.15	8835.47	7836.55	8934.47	9802.97	8523.79	9218.19	7986.52	8472.63	7846.38	8391.06
MW0008036	N-(2-Fluorobenzyl)-2-(4-morpholinyl)ethanamine	C13H19FN2O	494.3302	238.1481	0.6488	10.6901	626209-54-9	--	--	--	2772118	Benzenoids	Benzene and substituted derivatives	748.68	31631.42	37643.75	75362.54	18152.07	20308.71	44756.92	24367.94	6459.34	21065.4	21945.4	31429.16
MW0113107	4-Methyl-1-pentanol	C6H14O	125.0959	102.1045	0.5857	11.8027	626-89-1	HMDB0059889	--	--	12296	Organic oxygen compounds	Organooxygen compounds	81701.67	52626.3	63051.54	63369.78	86116.96	67783.4	52976.22	65529.92	4571.48	65478.59	39880.56	63946.75
MW0056748	Palmitoyl sphingomyelin	C39H79N2O6P	744.5967	702.5676	0.555	10.9137	6254-89-3	HMDB0061712	--	41586	9939941	Lipids and lipid-like molecules	Sphingolipids	6449.92	59925.24	54395.24	121327.42	3900.52	11338.91	30344.23	16832.04	414.96	11189.26	17115.77	14472.48
MW0103712	Xanthosine triphosphate	C10H15N4O15P3	587.9912	523.9747	0.6118	1.2363	6253-56-1	HMDB0000293	C00700	--	439296	Nucleosides, nucleotides, and analogues	Purine nucleotides	1571.61	1389.02	1496.21	836.32	378.52	1291.62	494.35	274.61	310.95	488.61	129.19	564.34
MW0149032	Ethyl 2-chloro-3-[4-(2-methyl-2-phenylpropoxy)phenyl]propanoate	C21H25ClO3	405.1206	360.1492	0.8895	4.2843	62516-91-0	--	C17302	--	194150	Benzenoids	Benzene and substituted derivatives	7516.31	11888.84	10993.47	7815.82	14638.13	9577.53	9220.04	17167.86	16065.14	16157.28	14616.84	16352.96
MW0108240	Methoxyacetic acid	C3H6O3	181.0697	90.0317	0.7978	0.9293	625-45-6	HMDB0041929	--	--	12251	Organic acids and derivatives	Carboxylic acids and derivatives	2695.42	5511.12	5573.79	6637.37	7086.28	6420.44	2096.0	2361.41	2080.45	1433.45	1688.53	2230.19
MW0114859	Methyl propenyl ketone	C5H8O	169.1224	84.0575	0.581	4.1079	625-33-2	HMDB0001184	--	58028	637920	--	--	274446.52	364502.55	343755.92	319122.01	394811.53	351711.07	404292.52	379938.29	399057.95	405178.11	461379.69	421535.97
MW0006739	Desmethylcitalopram	C19H19FN2O	311.149	310.1481	0.6136	4.2225	62498-67-3	HMDB0014021	C16608	--	162180	Benzenoids	Benzene and substituted derivatives	104776.44	116469.28	124117.77	79713.49	94004.44	123065.6	81338.67	90984.33	104514.68	83305.74	88459.67	80840.93
MW0157162	Spicamycin	C30H51N7O7	644.3755	621.385	0.5942	4.9386	62362-59-8	--	C15754	--	494023	Organic acids and derivatives	Carboxylic acids and derivatives	4982.78	5095.22	5570.84	5587.88	6796.92	5880.65	7984.4	6597.43	6276.73	6580.52	6910.3	7699.85
MW0049151	D-(-)-Citramalic acid	C5H8O5	297.0823	148.0372	0.5793	11.7801	6236-10-8	--	C02612	--	439766	Lipids and lipid-like molecules	Fatty Acyls	624340.5	578163.02	438112.82	659597.37	497500.6	401141.55	420935.63	339348.76	444562.53	355604.39	309052.8	301491.32
MW0120174	4-Allyl-5-methyl-4H-1,2,4-triazol-3-yl hydrosulfide	C6H9N3S	311.1106	155.0517	0.6397	6.0527	6232-84-4	--	--	--	2412471	Organoheterocyclic compounds	Azoles	1430.13	2056.97	2005.68	1323.67	1928.62	1142.57	1689.32	2538.59	2043.18	1362.53	2774.12	982.81
MW0107589	Isopropyl dodec-11-enylfluorophosphonate	C15H30FO2P	585.4001	292.1967	0.6114	9.3509	623114-64-7	--	--	--	85883708	Organic acids and derivatives	Organic phosphonic acids and derivatives	6005.9	5619.77	14019.68	2410.23	4154.15	5654.87	1617.12	1710.36	851.97	1651.09	1722.43	1812.36
MW0155067	Phaseolotoxin;N5-[Amino(sulfoamino)phosphinyl]-L-ornithyl-L-alanyl-N6-(aminoiminomethyl)-L-lysine	C15H34N9O8PS	554.1892	531.1989	0.5919	0.6519	62249-77-8	--	C08440	--	9936860	Organic acids and derivatives	Carboxylic acids and derivatives	1385.7	286.12	1060.84	1697.01	452.11	282.81	2478.68	1704.56	3300.05	3136.71	4181.18	1774.2
MW0011547	(E,E)-4,8,12-Trimethyltrideca-1,3,7,11-tetraene;TMTT	C16H26	258.1779	1320.9096	0.6448	6.3083	62235-06-7	HMDB0034498	C20700	--	6443227	Lipids and lipid-like molecules	Prenol lipids	2459.22	2701.52	1592.54	2549.47	1679.52	1844.15	1799.78	2576.77	622.89	1557.2	3077.56	2151.24
MW0138091	epsilon-Viniferin	C28H22O6	455.1359	454.1416	0.5848	4.8503	62218-08-0	HMDB0030604	C10289	--	5281728	Phenylpropanoids and polyketides	2-arylbenzofuran flavonoids	120001.58	124852.12	123190.54	122284.38	123111.2	116711.39	108521.95	97836.2	103519.23	100501.19	97391.8	90760.78
MW0053722	Glycerol trihexanoate	C21H38O6	387.2744	386.2668	0.74	9.2924	621-70-5	HMDB0031125	--	--	12131	Lipids and lipid-like molecules	Glycerolipids	17875.48	17710.15	20229.08	18543.7	19356.12	16524.16	21406.61	18969.88	19905.95	19345.8	18832.82	19922.19
MW0111226	N-Nitrosodipropylamine	C6H14N2O	207.0322	130.1106	0.5561	11.8116	621-64-7	--	C19279	72997	12130	Organic nitrogen compounds	Organonitrogen compounds	211796.41	267620.73	326723.24	377710.22	177418.24	337782.59	387866.89	206279.68	326678.86	227996.67	387835.39	281783.01
MEDN1138	3-nitro-L-tyrosine	C9H10N2O5	282.0517	226.05900000000003	0.7483	13.3661	621-44-3	HMDB0001904	-	--	65124	Amino acid and Its metabolomics	Amino acid derivatives	52502.66	175624.12	15115.71	94302.87	92563.22	112732.35	93587.69	52984.81	57124.17	109369.52	85355.31	79499.83
MEDP0862	3-hydroxyphenylacetic acid	C8H8O3	135.0439	152.0473	0.5654	2.2282	621-37-4	HMDB0000440	C05593	--	12122	Organic acid And Its derivatives	Organicacid and Its derivatives	7527.28	4804.33	3730.0	7041.41	5091.41	5677.67	8110.73	9420.02	6899.63	8076.77	9332.06	8242.38
MW0004140	3-Methylphenylacetic acid	C9H10O2	323.1259	150.0681	0.5931	3.9884	621-36-3	HMDB0002222	--	6557	12121	Benzenoids	Benzene and substituted derivatives	31449.88	27187.86	35396.29	10824.7	14822.87	29168.74	44241.94	41446.03	50148.24	46627.86	44900.28	40559.61
MEDN1032	1,3,5-Trimethoxybenzene	C9H12O3	133.0646	168.0786	0.6438	0.2645	621-23-8	HMDB0059963	-	--	69301	Benzene and substituted derivatives	Benzene and substituted derivatives	10768.54	10932.59	4545.95	4114.84	9693.25	10575.18	13837.83	11866.84	10636.63	19240.15	9361.87	10907.96
MW0117284	1-Piperidinecarboxylic acid, 4-(aminomethyl)-4-fluoro-, 1,1-dimethylethyl ester	C11H21FN2O2	233.1664	232.1587	0.6226	6.1697	620611-27-0	--	--	--	40152119	Organoheterocyclic compounds	Piperidines	597.19	547.81	604.37	818.44	743.2	187.56	387.56	1066.03	655.35	832.74	1020.21	142.47
MW0147897	Cyanidin 3-rutinoside 5-glucoside chloride	C33H41O20.Cl	856.206	792.188	0.5708	4.0065	62024-14-0	--	C04787	--	11953846	Phenylpropanoids and polyketides	Flavonoids	16929.59	8224.04	10572.84	8697.41	2773.08	10122.82	1024.31	1092.44	158.88	468.67	1500.38	389.64
MEDL02763	3-Hydroxybenzyl alcohol	C7H8O2	189.0739	124.0524	0.8965	2.2989	620-24-6	HMDB0059712	C03351	--	102	Phenolic acids	Phenolic acids	6224.35	3292.41	4919.05	294.19	170.3	4109.99	1047.37	93.58	205.2	2887.11	1488.32	1303.1
MW0113252	5-Methylfurfural	C6H6O2	128.0707	110.0368	0.6495	0.8358	620-02-0	HMDB0033002	C11115	--	12097	Organic oxygen compounds	Organooxygen compounds	1722.27	5183.2	4042.59	3409.95	5005.37	4520.04	3047.66	3630.64	2515.62	2398.9	3517.27	3961.11
MW0014993	6beta-Hydroxytestosterone	C19H28O3	305.2128	304.2038	0.9074	6.7465	62-99-7	HMDB0006259	C14497	--	65543	Lipids and lipid-like molecules	Steroids and steroid derivatives	7591.54	8410.51	24436.81	6176.9	23618.11	9022.89	6489.09	6647.54	80.47	7228.01	11185.35	6128.29
MW0015176	7alpha-Hydroxytestosterone	C19H28O3	352.2205	304.2038	0.9514	6.752000000000001	62-83-9	HMDB0003956	C05291	--	65541	Lipids and lipid-like molecules	Steroids and steroid derivatives	15316.86	19789.03	25621.36	11439.33	17155.16	19508.23	13854.19	13503.44	2385.34	14086.32	15691.53	13181.86
ZINC1853865	Nogos	C4H7Cl2O4P	480.9155	220.976	0.6314	10.7857	62-73-7	HMDB0033956	C14430	--	3039	Organic acids and derivatives	Organic phosphoric acids and derivatives	4288.28	5616.27	5140.41	5090.7	5110.06	4059.57	5449.42	4329.19	6168.36	5002.89	4504.73	5617.62
MW0017029	Cevadine	C32H49NO9	592.3688	591.3407	0.6067	5.6058	62-59-9	--	--	43815	5380394	Lipids and lipid-like molecules	Steroids and steroid derivatives	7182.8	6618.9	7463.6	5901.45	6881.51	7817.94	10077.12	8190.7	6487.42	10018.78	12477.37	9863.85
MEDP1594	METHACHOLINE	C8H17NO2	177.1669	159.1259	0.5327	4.7169	62-51-1	HMDB0015654	C07471	--	1993	Tryptamines,Cholines,Pigments	Cholines	907.59	1840.44	1533.52	851.59	1472.04	1710.86	2848.24	3457.06	3374.38	2997.44	2735.09	2597.83
MEDP0125	Choline	C5H14NO+	104.10700000000001	104.10799999999999	0.7827	0.7192	62-49-7	HMDB0000097	C00114	--	305	Tryptamines,Cholines,Pigments	Cholines	921637.44	1137792.33	1120979.32	901247.49	954810.66	1040925.57	699773.93	830974.2	841195.54	813695.97	824498.81	712590.26
MW0155492	Phenylmercury acetate	C8H8HgO2	339.0302	338.0231	0.6369	2.9237	62-38-4	--	C11151	--	16682730	Benzenoids	Benzene and substituted derivatives	12234.94	7235.34	8708.94	9041.14	5683.44	5666.24	1804.09	2182.42	2412.62	1794.26	2502.69	1377.06
MW0049069	Cucurbitacin B	C32H46O8	622.3346	558.3193	0.6256	6.2592	6199-67-3	HMDB0034927	C08794	41667	5281316	Lipids and lipid-like molecules	Steroids and steroid derivatives	341.2	2163.94	1867.48	511.05	1427.5	1676.56	892.28	528.82	599.29	69.24	722.71	709.94
MW0015378	9(10)-Epoxy-12Z-octadecenoic acid	C18H32O3	343.2477	296.2351	0.6789	6.8149	61949-82-4	HMDB0004701	--	--	12097313	Lipids and lipid-like molecules	Fatty Acyls	79722.86	86202.07	50563.6	77811.02	63979.65	53596.36	64569.54	61901.75	63380.04	65474.79	75601.07	66382.88
MW0130938	3-(1,1-Dimethylallyl)-8-hydroxy-7-methoxycoumarin	C15H16O4	225.0908	260.1049	0.6337	13.7992	61899-42-1	HMDB0131065	--	--	51136412	Phenylpropanoids and polyketides	Coumarins and derivatives	1231.08	1252.72	1460.99	1076.62	1253.19	1874.36	1743.55	1352.82	415.65	1384.27	1571.85	810.22
MW0110649	2-(4-Phenyl-1,3-thiazol-2-yl)ethylamine	C11H12N2S	431.1336	204.0721	0.6487	5.1001	61887-92-1	--	--	--	1497794	Organic nitrogen compounds	Organonitrogen compounds	35.22	530.37	613.63	21.36	675.37	674.94	554.63	880.14	1624.56	1592.19	1806.1	1810.76
MW0000972	[6]-Gingerdione	C17H24O4	310.2018	292.1675	0.6186	9.6317	61871-71-4	HMDB0039275	C10459	--	162952	Benzenoids	Phenols	3159.99	1790.02	3506.01	2835.35	2906.37	3726.5	3486.77	2410.96	2952.46	3030.49	2814.09	3630.68
MW0149220	Flindersiachromone;2-(2-Phenylethyl)chromone	C17H14O2	518.2328	250.0994	0.6465	6.1657	61828-53-3	--	C09007	--	441964	Organoheterocyclic compounds	Benzopyrans	17191.92	15585.17	14844.61	20204.74	18766.4	16137.12	16786.63	19631.37	19320.2	17788.24	19489.88	17500.9
ZINC8214406	Imperialine	C27H43NO3	882.2779	429.645	0.6017	11.3039	61825-98-7	-	-	--	442977	Lipids and lipid-like molecules	Steroids and steroid derivatives	402.18	1796.48	152.8	535.51	132.4	2974.69	409.89	16699.98	432.92	132.84	91.01	42.75
MW0010072	Voriconazole N-oxide	C16H14F3N5O2	383.1444	365.11	0.5787	1.6062	618109-05-0	HMDB0060893	--	--	10044355	Benzenoids	Benzene and substituted derivatives	4279.12	9979.72	8154.21	9683.55	11219.73	8365.09	4585.98	6792.64	5179.03	5865.9	4887.02	3853.09
MW0006166	Benzamidine	C7H8N2	258.1691	120.0687	0.6133	2.2144	618-39-3	--	C01784	--	2332	Benzenoids	Benzene and substituted derivatives	5827.47	1958.89	12020.05	2683.96	495.05	3378.5	1582.94	1644.95	2567.89	8801.14	2716.46	1756.11
MW0007031	Ethyl 3,4,5-trimethoxybenzoate	C12H16O5	241.1045	240.0998	0.5728	2.552	6178-44-5	HMDB0038627	--	--	231162	Benzenoids	Benzene and substituted derivatives	1685.77	2079.32	1836.55	2197.96	2771.63	2110.31	3357.71	2430.14	575.43	2493.02	3351.85	2538.1
MEDP1131	Arachidyl glycine	C22H43NO3	392.3127	369.3243	0.6779	10.3548	617703-96-5	-	-	--	--	Alcohol and amines	Amines	5337.95	361.96	595.41	3733.88	931.53	2194.63	2403.0	3600.67	1670.87	476.99	2537.73	2827.02
MEDN1311	2-Hydroxycaprylic acid	C8H16O3	161.11700000000002	160.1099	0.6882	8.4828	617-73-2	HMDB0000711	-	--	94180	Organic acid And Its derivatives	Organicacid and Its derivatives	3191.61	5224.77	4675.4	4338.27	6602.08	6035.85	5297.63	4758.01	4870.89	5856.98	6849.62	5120.47
MW0106678	Ethyl pyruvate	C5H8O3	250.1331	116.0473	0.5635	5.4123	617-35-6	HMDB0031643	--	--	12041	Organic acids and derivatives	Keto acids and derivatives	2571.5	1766.18	2895.35	2754.31	2311.56	2158.09	2520.91	2060.33	3852.65	2760.97	4320.64	2818.93
MW0106148	Chorismic acid	C10H10O6	292.9986	226.0477	0.5946	2.9247	617-12-9	HMDB0012199	C00251	--	12039	Organic acids and derivatives	Carboxylic acids and derivatives	3887.27	5422.24	4166.74	5448.27	6448.53	4748.1	7373.74	7471.47	6809.16	8612.08	6940.2	7622.4
MW0000801	(R)-N-(1-(4-Hydroxyphenyl)-2-hydroxyethyl)oleamide	C27H45NO3	476.3115	431.3399	0.6332	5.9469	616884-63-0	--	--	64738	6604915	Benzenoids	Benzene and substituted derivatives	2120.74	2155.81	2035.9	2328.7	2949.06	2506.7	2432.97	3118.28	2638.13	2719.81	4060.22	2830.48
MW0104284	1-Methylhydantoin	C4H6N2O2	156.0765	114.0429	0.6377	0.6587	616-04-6	HMDB0003646	C02565	--	69217	Organoheterocyclic compounds	Azolines	32849.13	31624.81	31494.57	46117.89	37167.45	28596.54	29921.4	33110.65	32678.46	30928.04	29848.66	30579.24
MW0153421	Mebhydrolin napadisilate;Diazoline	(C19H20N2)2.C10H8O6S2	917.2193	840.3015	0.8556	0.6595	6153-33-9	--	C13254	--	22529	Organoheterocyclic compounds	Indoles and derivatives	8907.86	2672.1	8153.22	7192.6	2779.96	3855.55	22654.75	27586.03	23009.1	22832.95	18505.3	26855.06
MW0107590	Isopropyl dodecylfluorophosphonate	C15H32FO2P	589.4281	294.2124	0.7490000000000001	11.26	615250-02-7	--	--	45402	24762154	Organic acids and derivatives	Organic phosphonic acids and derivatives	63890.1	59208.5	81280.52	52598.61	78479.37	62728.15	83192.7	49979.23	64724.96	90455.9	94335.18	88028.49
MW0143455	4-Prenylresveratrol	C19H20O3	615.2891	296.1412	0.6804	5.2628	61517-87-1	HMDB0038784	C10285	--	5281725	Phenylpropanoids and polyketides	Stilbenes	10398.76	5292.68	5604.57	12856.92	5160.51	5420.79	3757.8	4109.56	1987.1	2708.63	2883.97	3188.69
MW0007680	Methyl 2-[(2,4-dichlorophenoxy)acetyl]hydrazinecarboxylate	C10H10Cl2N2O4	314.9891	292.0018	0.6512	0.5253	61511-76-0	--	--	--	1581749	Benzenoids	Benzene and substituted derivatives	4603.75	5708.64	5782.82	4352.94	7206.53	4478.03	6362.02	5392.67	5192.67	6663.67	5702.67	5042.84
MW0013716	3-(Hexadecyloxy)-1,2-propanediol	C19H40O3	299.2944	316.2977	0.6494	0.264	6145-69-3	--	C13859	24090	72733	Lipids and lipid-like molecules	Glycerolipids	86064.13	86425.3	86102.33	82185.04	82219.65	79941.41	77369.98	79213.97	73527.26	87582.51	75094.09	76724.16
MW0104841	2-Phosphonoethylphosphonic acid	C2H8O6P2	236.9922	189.9796	0.5752	0.7193	6145-31-9	HMDB0013233	--	--	80247	Organic acids and derivatives	Organic phosphonic acids and derivatives	65286.64	18168.67	68238.1	83599.52	79863.32	72138.6	24272.15	125515.22	68634.38	77281.28	87066.72	88791.8
MW0006848	Dimepiperate	C15H21NOS	302.0977	263.1344	0.6431	6.9981	61432-55-1	--	C14571	--	91679	Benzenoids	Benzene and substituted derivatives	541.52	1439.52	1262.13	1786.84	1485.51	1579.34	1125.93	1499.83	1817.57	898.75	1509.65	2249.96
MW0123231	Carmofur	C11H16FN3O3	302.089	257.1176	0.6382	6.4946	61422-45-5	--	--	--	2577	Organoheterocyclic compounds	Diazines	2525.49	805.24	1099.02	2089.89	1799.55	1387.26	2314.02	1675.15	2192.7	2324.83	1705.21	2303.56
MEDN1312	2-hydroxyphenylacetic acid	C8H8O3	328.0813	152.0473	0.7015	8.8067	614-75-5	HMDB0000669	C05852	--	11970	Organic acid And Its derivatives	Organicacid and Its derivatives	2283.72	2245.27	2068.03	2569.95	2354.95	2121.83	2503.36	2617.67	2793.95	2355.61	1781.28	2551.06
MEDP0507	2-Hydroxycinnamic acid	C9H8O3	165.0545	164.0473	0.8623	1.1543	614-60-8	HMDB0002641	C01772	--	637540	Benzene and substituted derivatives	Phenolic acids	27516.1	31073.57	27611.99	45909.9	45394.28	27272.07	15609.45	15985.98	16818.39	16989.27	17093.45	17324.25
MW0055327	N-Myristoylsphinganine	C32H65NO3	512.5028	511.4964	0.5307	10.3548	61389-70-6	HMDB0011759	--	--	10255824	Lipids and lipid-like molecules	Sphingolipids	30985.86	61798.32	53827.02	76882.01	82794.07	68603.21	98437.97	43275.93	49043.58	72793.56	32490.82	92012.53
MW0158061	Trilobine	C35H34N2O5	604.2804	562.2468	0.6415	3.9464	6138-73-4	--	C09669	--	169007	Lignans, neolignans and related compounds	--	1849.69	1334.68	3162.02	505.02	94.55	1836.73	82.48	8.81	256.14	94.42	311.63	60.13
MW0139960	Wuweizisu C	C22H24O6	769.3206	384.1573	0.597	7.896	61301-33-5	--	--	--	119112	Phenylpropanoids and polyketides	Tannins	6517.18	7061.65	7468.81	8731.81	8363.43	8964.73	4878.51	6347.1	6299.7	6869.73	10032.31	7887.01
MW0006294	Benzyl 2-naphthyl ether	C17H14O	486.24300000000005	234.1045	0.6405	6.5662	613-62-7	--	--	--	123080	Benzenoids	Naphthalenes	11266.12	9424.78	9278.56	10253.78	11083.4	10008.59	11877.76	13199.63	10914.97	10502.71	16135.21	12376.2
MW0015440	9-deoxy-9-methylene-16,16-dimethyl -PGE2	C23H38O4	425.2892	378.277	0.6602	9.4698	61263-35-2	--	D02726	36130	5283060	Lipids and lipid-like molecules	Fatty Acyls	56952.64	50807.62	71969.9	34883.68	41451.06	50158.47	25372.69	33827.8	27132.71	28340.61	32532.58	28065.88
MW0147254	Catheduline E2	C38H40N2O11	747.2758	700.2632	0.6409999999999999	3.1706	61231-06-9	--	C09935	--	442517	Organic acids and derivatives	Carboxylic acids and derivatives	2989.69	3135.27	3653.92	2804.79	3488.28	3437.51	2388.71	2138.9	2191.02	2310.24	2378.12	2564.13
MW0112095	2-Buten-1-ol	C4H8O	55.0544	72.0575	0.7179	11.8051	6117-91-5	HMDB0033858	--	--	637922	Organic oxygen compounds	Organooxygen compounds	59476.74	50260.74	35992.54	25074.53	35715.11	29889.06	34632.02	33279.29	28392.68	21828.49	21689.95	29665.05
MW0125931	Nε-Biotinyl-L-lysine amide	C16H29N5O3S	448.1182	371.1991	0.6491	12.9836	61125-53-9	--	--	--	3080879	Organoheterocyclic compounds	Biotin and derivatives	83893.44	68566.3	76859.29	106840.89	73429.33	133336.53	53019.12	82058.53	72130.4	51678.44	45943.99	49671.99
MW0003152	2-Hydroxyphenylacetic acid	C8H8O3	135.0439	152.0473	0.679	11.7334	611-71-2	HMDB0000669	C05852	--	11970	Benzenoids	Benzene and substituted derivatives	42621.08	35777.0	35443.31	37495.96	45786.11	28369.04	57489.42	52900.42	26669.47	24672.12	26785.02	17357.24
MW0139791	Tectoridin	C22H22O11	480.1568	462.1162	0.5094	10.6766	611-40-5	--	C10533	--	5281810	Phenylpropanoids and polyketides	Isoflavonoids	4.56	10.76	9.03	4.24	6.73	0.68	9.42	10.48	171.31	8.08	14.95	1.63
MW0116247	1-(1-(4-Bromophenyl)-2,5-dimethyl-1H-pyrrol-3-yl)-2-chloroethan-1-one	C14H13BrClNO	369.9583	324.9869	0.6433	12.759	610274-24-3	--	--	--	2378265	Organoheterocyclic compounds	Pyrroles	1827.32	2066.53	1736.57	1854.96	1975.91	1956.65	1921.54	1625.22	2205.81	2509.89	1821.46	914.85
MEDN0153	Adenosine 5'-Monophosphate	C10H14N5O7P	348.0714	347.06300000000005	0.8440000000000001	1.1521	61-19-8	HMDB0000045	C00020	--	6083	Nucleotide And Its metabolomics	Nucleotide and Its metabolomics	4243547.08	4844858.68	4285082.26	6207349.88	5653894.94	4716217.13	6785329.33	6699193.15	7464366.19	7255920.01	7208115.38	7224379.12
MW0122717	Acepromazine	C19H22N2OS	670.3248	326.1453	0.6323	0.6295	61-00-7	HMDB0015552	D07065	--	6077	Organoheterocyclic compounds	Benzothiazines	711.09	696.8	1288.98	194.35	1556.03	781.96	6189.92	4547.39	5532.26	3965.1	2620.46	4486.36
MW0155546	Physovenine	C14H18N2O3	301.0921	262.1317	0.7081	2.0783	6091-05-0	--	C09232	--	442113	Organoheterocyclic compounds	Indoles and derivatives	2777.64	2969.39	2330.52	4668.87	4191.22	2821.62	6334.16	5648.87	4516.12	4132.33	5813.14	6555.79
MW0105181	4-Acetyl-1-methylcyclohexene	C9H14O	139.1116	138.1045	0.6867	5.056	6090-09-1	HMDB0033434	--	89268	93019	--	--	139844.11	136740.98	134453.06	144741.3	144584.05	132781.3	150881.97	142165.03	138378.86	150876.53	149070.87	147380.46
MW0147938	Cycloguanil pamoate	C23H16O6.(C11H14ClN5)2	954.2988	890.2822	0.6219	11.4356	609-78-9	--	C11724	--	443381	Benzenoids	Naphthalenes	11217.18	10542.18	18219.27	9756.68	9925.42	11756.82	12769.2	12939.97	15909.72	22043.81	35189.64	30499.2
MW0140609	(R)-Ipsdienol;(4R)-2-Methyl-6-methyleneocta-2,7-dien-4-ol	C10H16O	137.1235	152.1201	0.9520000000000001	5.2175	60894-97-5	--	C20943	--	181296	Lipids and lipid-like molecules	Prenol lipids	1746.91	1713.29	1665.32	423.58	1585.92	1252.7	1097.13	1757.46	1190.37	1844.55	1719.54	1636.8
MW0062283	Prostratin	C22H30O6	781.4093	390.2042	0.5664	7.7791	60857-08-1	--	C20197	--	454217	Lipids and lipid-like molecules	Prenol lipids	53383.83	49823.74	62774.28	34655.18	47893.24	62165.99	37119.11	36657.14	37451.97	43036.86	47945.68	39374.35
MEDN0120	Dulcitol	C6H14O6	147.0651	182.079	0.6499	0.2508	608-66-2	HMDB0000107	C01697	--	11850	Carboxylic acids and derivatives	Sugar alcohols	13547.73	12524.64	11124.36	10974.49	12100.15	12147.83	8936.49	19539.16	12708.32	9889.09	10600.15	2901.37
MW0004639	4-Amino-N-(2,4-diaminophenyl)benzamide	C13H14N4O	507.2228	242.1168	0.6455	6.3178	60779-50-2	--	--	--	759402	Benzenoids	Benzene and substituted derivatives	3487.93	3826.3	2107.5	3665.06	3627.29	3650.22	3950.76	2802.53	523.04	3396.78	3526.5	3606.62
MW0118280	2-Amino-7-phenyl-7,8-dihydro-5(6H)-quinazolinone	C14H13N3O	222.1029	239.1059	0.6218	5.056	6075-47-4	--	--	--	2772388	Organoheterocyclic compounds	Diazanaphthalenes	1277.78	2224.77	1891.51	1748.62	1189.21	1742.28	315.68	2252.37	2155.2	2656.87	2847.64	611.21
MW0054285	Latanoprost ethylamide	C25H39NO4	478.2497	417.2879	0.6896	2.1504	607351-44-0	--	--	45716	10287826	Lipids and lipid-like molecules	Fatty Acyls	2318.94	11116.95	9539.17	16913.86	22878.65	10734.63	659.03	443.55	69.43	873.23	327.22	411.21
MW0001275	1,2,4-Triazolidine-3-thione, 2-(4-chlorophenyl)-5-methyl-5-(3-methylbutyl)-	C14H20ClN3S	612.2476	297.1066	0.6296	4.0199	6071-56-3	--	--	--	2884423	Benzenoids	Benzene and substituted derivatives	2851.56	2698.98	2358.45	1932.07	1564.98	1716.7	1549.69	1740.45	1763.92	1717.94	1467.25	1263.09
MW0142502	2-Nitrofluorene;NF	C13H9NO2	275.079	211.0633	0.6444	4.7025	607-57-8	--	C10923	--	11831	Benzenoids	Fluorenes	3563.7	3631.28	3429.8	2718.28	2992.64	3440.92	3835.7	3184.51	3481.52	3680.4	3457.79	3558.92
MW0106215	Cyclo[3-(2-naphthalenyl)-L-alanylglycyl-D-tyrosyl-L-arginyl-L-arginyl]	C36H47N11O6	776.3839999999999	729.3711	0.6447	11.3886	606968-52-9	--	--	--	5275843	Organic acids and derivatives	Carboxylic acids and derivatives	1699.3	950.88	2602.45	2489.86	3575.29	2311.64	2675.83	2189.41	3792.83	3030.73	2917.31	3352.73
MW0106722	Fosfosal	C7H7O6P	240.9873	217.998	0.8943	0.5687	6064-83-1	--	D07991	44294	3418	Organic acids and derivatives	Organic phosphoric acids and derivatives	607285.25	532625.02	630673.56	480632.73	502665.7	579141.82	343308.48	327810.53	382063.41	361973.36	438116.33	333343.36
MW0105008	3-Dodecyloxypropanoic acid	C15H30O3	241.2161	258.2195	0.6433	0.2732	6064-81-9	--	--	--	284198	Organic acids and derivatives	Carboxylic acids and derivatives	10961.05	3144.08	11088.24	6882.3	7973.45	8754.25	9278.5	10183.3	16767.85	7487.78	4154.14	9432.18
MW0145175	Antibiotic TA	C35H61NO8	624.4469	623.4397	0.6466	10.0312	60616-99-1	--	C15756	--	6438547	Phenylpropanoids and polyketides	Macrolide lactams	1849.18	1961.8	2311.71	212.33	563.67	1346.14	105.56	124.29	115.39	108.17	382.29	177.41
ZINC3869266	L-3-Hk	C10H12N2O4	247.206	224.21599999999998	0.75	11.8677	606-14-4	-	C02794	--	11811	Organic oxygen compounds	Organooxygen compounds	6629.25	6894.61	6143.65	6946.87	5635.85	7279.9	780.54	7819.65	1726.66	6975.45	6900.14	6763.14
MW0124192	Furmecyclox	C14H21NO3	252.1591	251.1521	0.7083	5.2773	60568-05-0	--	C18912	--	43359	Organoheterocyclic compounds	Furans	7663.47	18248.46	14910.79	15999.85	23782.88	17489.17	35705.92	32394.48	31276.74	16162.2	41818.84	35840.51
MW0117549	2-(4,4-Difluoropiperidin-1-yl)ethanamine	C7H14F2N2	187.1019	164.1125	0.6409999999999999	3.0531	605659-03-8	--	--	--	2758354	Organoheterocyclic compounds	Piperidines	2240.71	2006.85	1815.06	1950.63	1979.86	2133.34	1837.18	1857.31	2031.5	1743.01	1794.47	2082.49
MW0120219	4-Amino-6,7-dimethoxy-2-(1-piperazinyl)quinazoline	C14H19N5O2	290.16	289.1539	0.645	3.34	60547-97-9	--	--	2460	616267	Organoheterocyclic compounds	Diazinanes	3355.51	5570.85	5256.26	2411.31	5807.15	6304.16	1352.99	1336.45	1047.53	1414.93	1995.22	1467.04
MW0011080	(2S)-3-Hydroxypropane-1,2-diyl didecanoate	C23H44O5	418.3529	400.3189	0.6446	7.691	60514-49-0	HMDB0092961	C03199	--	162916	Lipids and lipid-like molecules	Glycerolipids	247.75	3460.05	3476.16	334.02	3274.35	2306.7	728.1	1232.61	439.72	1636.1	430.3	524.62
MW0011898	1,2-Dioctanoyl-sn-glycerol	C19H36O5	367.2464	344.2563	0.6865	9.5046	60514-48-9	HMDB0116368	--	414	148879	Lipids and lipid-like molecules	Glycerolipids	5839.72	9807.73	5022.35	8098.79	9461.57	8299.93	7541.4	2419.3	2354.45	15056.58	8229.64	8830.15
MW0137302	Aklavin	C30H35NO10	408.171	569.2261	0.6728	0.8974	60504-57-6	--	C18634	43581	149755	Phenylpropanoids and polyketides	Anthracyclines	45033.48	43356.18	69229.95	28636.76	34984.91	44798.29	45389.6	38003.65	46306.82	50459.64	42593.73	38673.55
MW0123447	Cyclic Pifithrin-a	C16H16N2S	537.221	268.1034	0.5032	4.3113	60477-34-1	--	C11571	--	443278	Organoheterocyclic compounds	Azoles	422876.29	168418.23	205131.6	175012.73	56902.51	236639.81	25094.27	26677.48	23438.8	20505.41	30738.85	22483.0
MW0125406	N-(4-Fluorophenyl)-4-(2-methoxyphenyl)piperazine-1-carbothioamide	C18H20FN3OS	363.1653	345.1311	0.6279	4.3443	6046-23-7	--	--	--	776634	Organoheterocyclic compounds	Diazinanes	12427.55	6000.2	13214.86	2871.25	4352.13	10581.29	2680.19	2854.91	368.89	3305.15	4114.2	3886.35
MW0007869	N-((2E)-5-(3-Ethoxyphenyl)-1,3,4-thiadiazol-2(3H)-ylidene)-2-fluorobenzamide	C17H14FN3O2S	382.0419	343.0791	0.6167	1.7841	6041-76-5	--	--	--	743415	Benzenoids	Benzene and substituted derivatives	18827.09	15235.05	17443.89	14891.22	13644.09	12635.22	19754.92	17058.65	14754.39	15688.54	15119.09	17067.75
MW0017089	Cholesteryl linoleate	C45H76O2	725.5014	648.5845	0.5586	10.785	604-33-1	HMDB0000610	C15441	--	5287939	Lipids and lipid-like molecules	Steroids and steroid derivatives	629.74	3687.55	1458.88	482.56	1739.12	2044.02	584.43	239.42	558.96	941.35	498.33	249.52
MW0106691	Eur 2	C37H42O13	739.2344	694.2625	0.6267	0.6423	60389-87-9	--	--	--	133564728	--	--	3951.22	3864.43	4314.89	4886.46	4034.29	4790.45	8869.89	11046.2	11573.54	11260.18	14060.67	10547.73
MW0105565	Alatolin	C42H44O13	721.2656	756.2782	0.5922	0.6561	60389-86-8	--	--	--	57509354	Organic acids and derivatives	Carboxylic acids and derivatives	33852.61	19510.63	29333.49	34631.06	23937.25	21127.36	135769.98	129254.22	143663.93	110567.95	134560.41	129096.07
MEDL00581	D-Allose	C6H12O6	163.0601	180.0634	0.6499	3.1772	6038-51-3	HMDB0001151	-	--	439507	Carboxylic acids and derivatives	Sugars	2559.24	7485.14	12366.81	4933.92	8343.03	8194.72	1988.57	2157.34	580.69	2844.13	1366.8	2372.22
MEDL01793	Jubanine A	C40H49N5O6	734.3282	695.3677	0.5402	4.079	60375-07-7	HMDB0030205	-	--	101316794	Alkaloids	Alkaloids	2419.82	1537.33	2279.17	1570.58	3049.03	3181.79	4137.71	3325.98	2918.03	5458.83	4455.34	3521.41
MW0148672	Doronine;4,8-Secosenecionan-8,11,16-trione, 15,20-dihydro-12-(acetyloxy)-20-chloro-15-hydroxy-4-methyl-	C21H30ClNO8	482.1555	459.166	0.6388	10.6816	60367-00-2	--	C10286	--	6441893	--	--	1.22	2.84	2.05	55.57	0.37	1.08	2.01	5.31	53.1	4.86	4.24	1.35
MW0006100	Aurin	C19H14O3	291.0872	290.0943	0.748	4.0167	603-45-2	--	C14213	44052	5100	Benzenoids	Benzene and substituted derivatives	10729.75	7503.49	9507.17	7739.26	4277.32	10026.31	1861.46	3390.22	2899.29	2716.89	3402.82	2725.61
MW0153437	Melampodinin	C25H30O12	540.1908	522.1737	0.6112	2.6537	60295-53-6	--	C09501	--	5359028	Lipids and lipid-like molecules	Prenol lipids	6059.86	9656.7	7859.62	9524.08	10876.89	7612.26	3886.74	4840.32	2932.3	3436.28	4156.22	4128.09
MW0000427	Rinderine	C15H25NO5	300.1806	299.1733	0.5964	4.0202	6029-84-1	--	C10378	--	442758	Alkaloids and derivatives	--	4262.92	2909.69	2649.96	9861.33	7518.59	2118.4	1282.79	1319.19	1820.0	3894.26	2350.6	1337.49
MEDP1617	L-(+)-Gulose	C6H12O6	203.0524	180.0634	0.7612	1.6336	6027-89-0	-	C15923	--	10130220	Carboxylic acids and derivatives	Sugars	95561.66	40423.4	37198.1	49046.33	40683.01	88136.48	53081.05	118568.09	74636.47	70062.59	75779.86	136967.01
MW0151809	Isococculidine;Erythrinan, 1,2-didehydro-3,15-dimethoxy-,(3-beta)-	C18H23NO2	330.1441	285.1729	0.6403	1.9717	60229-91-6	--	C09546	--	442300	Alkaloids and derivatives	Erythrina alkaloids	2660.82	3300.44	5715.21	209.03	709.02	3436.29	44.94	67.12	30.67	118.04	29.89	3.4
MW0013656	2-Propyl-2-pentenoic acid	C8H14O2	184.1332	142.0994	0.5471	4.419	60218-41-9	HMDB0013902	C16653	--	6437068	Lipids and lipid-like molecules	Fatty Acyls	2255.73	211.89	794.36	2405.51	489.8	430.38	2226.31	2057.42	2407.81	2421.42	2627.04	2227.44
MW0000353	N-Isopropylatropine	C20H29NO3	349.2487	331.2147	0.6465	5.9907	60205-81-4	HMDB0014476	C07052	841	657309	Alkaloids and derivatives	Tropane alkaloids	3372.81	9435.66	10734.68	4562.92	11184.84	10492.95	4269.19	4627.1	256.01	6495.12	6957.49	5186.89
MEDN0797	PGJ2	C20H30O4	318.2143	334.2144	0.9581	9.1022	60203-57-8	HMDB0002710	C05957	--	5280884	Oxidized lipids	Oxidized lipids	1637.08	5332.48	2328.14	2528.78	3947.73	2232.99	2011.33	1089.94	1864.92	686.03	867.32	1487.6
MW0150604	Gnididilatin	C37H48O10	239.149	652.3247	0.7026	11.3093	60195-69-9	--	C09101	--	44575850	Lipids and lipid-like molecules	Prenol lipids	43514.86	54089.94	36484.68	53853.16	41946.98	40227.62	38533.03	42285.9	44350.62	42671.75	39252.8	43086.82
MW0106741	Gabapentin	C9H17NO2	189.1636	171.1259	0.5905	5.9025	60142-96-3	HMDB0005015	--	--	6919078	--	--	27128.56	25977.3	26922.93	31552.25	31291.87	26485.96	31397.53	35523.61	31833.96	35087.05	39628.52	32921.31
MW0137530	Brefeldin A	C16H24O4	281.1727	280.1675	0.7866	5.6058	60132-23-2	--	--	85101	5287620	Phenylpropanoids and polyketides	Macrolides and analogues	130494.99	134360.38	127920.38	173998.05	171695.49	212528.56	177550.98	209323.54	189812.95	229140.62	284900.8	318738.02
ZINC1704590	2-Hydroxycinnamaldehyde	C9H8O2	225.0803	148.161	0.6912	4.9092	60125-23-7	HMDB0031725	-	--	5318169	Phenylpropanoids and polyketides	Cinnamaldehydes	2868.32	2750.04	65.57	2342.17	3196.23	2105.51	2625.33	1493.6	530.71	2483.83	2334.21	3186.76
MW0115457	Valproic acid glucuronide	C14H24O8	321.1549	320.1471	0.7427	3.0007	60113-83-9	HMDB0000901	--	--	88111	Organic oxygen compounds	Organooxygen compounds	10739.44	15430.75	19715.7	7713.04	15508.54	17118.46	13457.49	13625.09	841.52	14564.79	13356.7	12974.69
MW0105126	3-Oxovalproic acid	C8H14O3	123.0803	158.0943	0.6411	3.5936	60113-81-7	HMDB0060685	C16652	2990	173719	Organic acids and derivatives	Keto acids and derivatives	14412.42	16567.37	14798.1	15683.15	8855.72	15986.27	13895.25	15233.45	15680.32	8715.01	17483.9	8950.16
MW0001713	1-Pyrrolidinecarboxamide, N,N'-(4-methyl-1,3-phenylene)bis-	C17H24N4O2	317.1963	316.1899	0.9372	5.2921	60006-11-3	--	--	--	6453890	Benzenoids	Benzene and substituted derivatives	8677.77	10981.58	11021.4	9620.92	11687.66	10648.65	9707.07	7732.11	8351.18	10987.72	11555.72	9372.11
MEDN1133	Butanone acid	C4H6O3	85.0284	102.0317	0.6498	12.4272	600-18-0	-	-	--	--	Organic acid And Its derivatives	Organicacid and Its derivatives	1121.48	1644.27	1540.27	1777.33	1407.53	1153.7	1739.22	1290.25	66.83	1865.83	865.7	1043.79
MEDL02152	Cyclic Amp	C10H12N5O6P	330.0602	329.0525	0.8005	1.643	60-92-4	HMDB0000058	C00575	--	6076	Nucleotides and derivatives	Nucleotides and derivatives	4994.96	3145.48	3490.8	6280.68	3870.41	4040.63	1945.91	1874.19	2203.98	2151.06	2173.87	1779.93
MW0009531	Promethazine	C17H20N2S	329.1058	284.1347	0.6374	0.6134	60-87-7	HMDB0015202	C07404	--	4927	Organoheterocyclic compounds	Benzothiazines	19542.0	21256.75	22950.64	14304.82	20806.5	19419.87	23770.01	24901.95	29997.98	17410.7	27468.28	25857.56
MW0139344	Phlorizin	C21H24O10	551.0118	436.1369	0.6447	0.5547	60-81-1	HMDB0036634	C01604	--	6072	Phenylpropanoids and polyketides	Flavonoids	57958.35	57349.5	62180.41	62005.36	60892.92	57995.74	55962.76	57019.97	54635.01	50422.7	58150.04	53956.23
MW0139803	Tetracycline	C22H24N2O8	427.153	444.1533	0.6156	5.5305	60-54-8	HMDB0014897	C06570	--	54675776	Phenylpropanoids and polyketides	Tetracyclines	4026.61	33028.93	21221.65	1201.98	945.36	26597.58	2887.2	1879.91	1724.68	23690.83	7970.88	6090.01
MW0054696	Mecamylamine	C11H21N	231.183	167.1674	0.6345	5.2478	60-40-2	HMDB0014795	C07511	--	4032	Lipids and lipid-like molecules	Prenol lipids	3135.48	2635.31	3413.23	3677.79	3211.43	3287.05	3536.64	4453.53	3734.49	4277.14	3333.58	3536.19
MEDN0383	FFA(18:2)	C18H32O2	281.2476	280.2402	0.6444	0.2854	60-33-3	HMDB0000673	C01595	--	--	FA	FFA	9313.08	7606.26	8949.44	5801.57	3384.15	8171.49	8537.0	5888.33	6195.15	2529.08	4687.47	6281.19
MEDP1002	Acetylcholine	C7H15NO2	146.1179	145.1103	0.8314	0.8062	60-31-1	HMDB0000895	C01996	--	187	Alcohol and amines	Polyamines	3678511.6	3159009.38	3283755.9	4276145.46	3406485.03	3241540.74	4362799.31	4613393.97	4459379.89	4218930.9	4881649.22	4561721.29
MW0150788	Hexamethonium	C12H30N2	266.2561	202.2409	0.6044	10.9911	60-26-4	--	C07510	--	3604	Organic nitrogen compounds	Organonitrogen compounds	1643.15	674.37	2228.33	1626.67	815.77	1115.84	474.57	5484.38	4012.38	4466.68	1044.0	3000.87
MW0127405	beta-Mercaptoethanol	C2H6OS	174.0619	78.0139	0.6392	0.5687	60-24-2	--	C00928	--	1567	Organosulfur compounds	Thiols	1863.69	1805.34	1610.42	2488.12	1747.63	2432.44	2472.49	1531.76	2200.7	387.69	1219.25	1779.45
MEDN0006	L-Tyrosine	C9H11NO3	182.0811	181.0739	0.8690000000000001	1.1543	60-18-4	HMDB0000158	C00082	--	6057	Amino acid and Its metabolomics	Amino acids	58993.82	61270.42	58892.81	91832.45	92655.65	62396.06	35126.82	36121.01	35355.66	42285.19	38101.89	34883.52
MW0102922	Tributyrin	C15H26O6	349.1861	302.1729	0.5885	4.4188	60-01-5	HMDB0031094	C13870	--	6050	Lipids and lipid-like molecules	Glycerolipids	201509.26	184328.46	261999.62	154553.74	173604.93	195977.1	137387.57	129273.03	145969.8	169715.85	179527.17	152221.56
MW0001042	1-(1-Ethylpropyl)-4-(2,3,4-trimethoxybenzyl)piperazine	C19H32N2O3	375.2072	336.2413	0.508	9.3073	5996-82-7	--	--	--	787035	Benzenoids	Benzene and substituted derivatives	1433.47	908.67	1965.58	2874.66	1893.09	2560.46	1987.53	2726.49	870.96	1884.78	2584.02	2223.38
MW0115531	β-Gentiobiose	C12H22O11	325.0974	342.1162	0.7998	0.5836	5996-00-9	--	C08240	--	441422	Organic oxygen compounds	Organooxygen compounds	5223.97	7955.33	8379.22	10810.34	9594.58	9247.12	9284.06	8487.82	8096.01	10129.57	12364.33	9553.86
MW0054697	Medicagenic acid	C30H46O6	485.3229	502.3294	0.6459	11.0953	599-07-5	--	--	--	65048	Lipids and lipid-like molecules	Prenol lipids	6493.2	2212.53	5959.5	8068.35	10905.75	6570.18	22335.07	10611.67	14275.77	20785.29	23741.64	21055.79
MEDN0546	13,14-dihydro-15-keto PGD2	C20H32O5	317.2014	352.225	0.7439	7.4118	59894-07-4	HMDB0060042	-	--	--	Oxidized lipids	Oxidized lipids	6578.63	22301.22	13806.03	24754.53	26382.27	15639.15	826.49	1135.06	1183.13	16405.05	2384.3	962.33
MW0052439	D-Limonene	C10H16	138.1356	136.1252	0.9612	4.821000000000001	5989-27-5	HMDB0004321	C06099	--	440917	Lipids and lipid-like molecules	Prenol lipids	4452.05	5285.34	4710.82	5142.96	5322.61	5588.01	5707.97	6958.44	5695.57	5916.23	6838.31	6140.08
MW0108302	Methylurea	C2H6N2O	119.0189	74.048	0.6149	0.569	598-50-5	--	C16363	--	11719	Organic acids and derivatives	Organic carbonic acids and derivatives	47782.89	47290.19	49038.72	48538.84	45262.3	47206.67	43828.2	43103.43	42739.63	42499.58	49731.34	42662.59
MW0147866	Cucurbitacin J	C30H44O8	550.337	532.3036	0.6189	7.4262	5979-41-9	--	C08801	--	441819	Lipids and lipid-like molecules	Steroids and steroid derivatives	2046.87	709.7	1353.7	2409.38	792.03	737.38	2574.35	2612.85	2917.3	1134.04	2525.6	2605.41
MW0001143	1-(4-Bromobenzyl)-4-(2-pyridinylmethyl)piperazine	C17H20BrN3	387.1179	345.0841	0.6475	9.4109	5979-16-8	--	--	--	751073	Benzenoids	Benzene and substituted derivatives	1768.16	1928.67	2779.03	843.89	1306.62	1728.99	525.13	609.67	592.48	874.86	753.13	885.89
MW0014465	4-Hydroxy-17β-estradiol	C18H24O3	356.1219	288.1725	0.653	3.8532	5976-61-4	HMDB0005896	C14209	41825	5282360	Lipids and lipid-like molecules	Steroids and steroid derivatives	5417.73	7104.29	6275.97	8453.18	8132.58	6459.17	1259.69	1805.69	476.11	1799.51	1927.45	1203.73
MW0011875	1,2-Dilauroyl-sn-glycero-3-phosphoethanolamine	C29H58NO8P	418.3526	579.39	0.8541	10.4753	59752-57-7	--	--	--	90657571	Lipids and lipid-like molecules	Glycerophospholipids	90075.59	88224.53	82415.39	78234.43	91839.38	75244.17	93975.61	92401.08	96740.11	81298.86	80237.69	96624.3
MW0137580	Camostat	C20H22N4O5	819.2903	398.159	0.6513	4.2116	59721-28-7	--	D07606	--	2536	Phenylpropanoids and polyketides	Depsides and depsidones	2796.68	2729.51	1364.32	327.99	2122.59	3022.7	2185.04	669.54	3253.91	10765.59	1285.88	2034.2
MW0114814	Melezitose	C18H32O16	543.131	504.16900000000004	0.8076	0.7754	597-12-6	HMDB0011730	C08243	--	92817	Organic oxygen compounds	Organooxygen compounds	154373.04	164099.81	183567.3	86596.81	98728.46	193148.45	64981.02	67425.18	56322.75	64456.19	78197.13	65434.18
MW0146483	Axisothiocyanate 3	C16H25NS	327.1861	263.1708	0.6126	6.9791	59633-81-7	--	C17007	--	23425033	Lipids and lipid-like molecules	Prenol lipids	831.22	1592.29	1247.92	1841.57	1444.0	1176.59	2528.77	2818.4	2451.45	2622.94	2828.83	2802.83
MEDP1218	3-Amino-2-menacarboxylic acid	C11H9NO2	188.0681	187.0633	0.5048	1.8978	5959-52-4	-	-	--	--	Benzene and substituted derivatives	Phenolic acids	11172.95	11016.04	15587.79	16100.94	16483.97	14450.2	6388.56	7018.56	7301.0	7309.75	8214.11	7441.74
MW0157200	Staphidine	C42H58N2O	589.4495	606.4549	0.5451	10.4144	59588-15-7	--	C08712	--	431675	Lipids and lipid-like molecules	Prenol lipids	76973.55	81329.19	146047.78	15982.2	53436.18	51488.8	27779.85	26916.85	30386.23	13223.08	17480.96	24841.27
MW0013074	2,2-Dimethylbutyric acid	C6H12O2	233.1751	116.0837	0.5729	4.8057	595-37-9	--	--	4479	11684	Lipids and lipid-like molecules	Fatty Acyls	1050066.81	708835.23	678603.95	1094741.37	712638.27	683801.74	808628.27	821000.64	778600.57	803418.75	911146.1	855953.49
MW0012942	1-Oleoyl-2-palmitoyl-sn-glycero-3-phosphocholine	C42H82NO8P	760.579	759.5778	0.5215	11.1466	59491-62-2	HMDB0008100	--	--	24778933	Lipids and lipid-like molecules	Glycerophospholipids	57909.28	30225.06	10621.73	6577.68	8529.31	8302.54	7104.44	7002.16	31109.33	5705.29	9772.12	6443.74
MW0152007	Karwinskione	C32H32O7	529.214	528.2148	0.5381	2.3012	59481-46-8	--	C09944	--	442524	Lignans, neolignans and related compounds	Arylnaphthalene lignans	13782.85	26914.38	24803.3	17868.76	29619.77	26656.19	32518.93	31101.57	42342.55	36037.32	29610.13	31787.66
MW0056906	PC(16:0/22:6(4Z,7Z,10Z,13Z,16Z,19Z))	C46H80NO8P	844.5247	805.5622	0.6238	3.5962	59403-54-2	HMDB0007991	--	--	6441886	Lipids and lipid-like molecules	Glycerophospholipids	1917.32	2206.33	2256.12	1699.97	2296.39	774.6	2343.75	3464.87	2913.74	2997.37	3554.24	3195.4
MW0056885	PC(16:0/18:0)	C42H84NO8P	784.5833	761.5935	0.8065	11.4216	59403-51-9	HMDB0007970	--	--	24778686	Lipids and lipid-like molecules	Glycerophospholipids	104464.91	284011.97	296673.14	293648.86	206416.35	259104.89	64340.96	117123.28	158874.98	252051.09	216858.87	229474.36
MW0011438	(6E)-8-Methyl-6-nonenoic acid	C10H18O2	171.1381	170.1307	0.6941	7.5739	59320-77-3	HMDB0012183	C18202	--	5365959	Lipids and lipid-like molecules	Fatty Acyls	38393.29	51254.64	52631.96	25895.42	47213.8	55480.84	26307.52	18526.57	884.74	27595.64	24154.9	28684.73
MEDN1131	2-tridecane	C13H26O	171.1742	198.1984	0.7139	0.2641	593-08-8	-	-	--	--	Aldehyde,Ketones,Esters	Ketones	1566.78	3017.22	2822.09	2927.03	821.18	4250.12	1305.01	2845.43	2811.04	3294.83	2541.72	2371.67
MW0052477	Dodecyl glucoside	C18H36O6	371.2367	348.2512	0.5885	4.2841	59122-55-3	--	--	34493	93321	Lipids and lipid-like molecules	Fatty Acyls	1368.61	2739.85	2596.4	2738.54	3054.13	2510.75	4680.15	3700.49	4587.29	4353.49	2718.3	4665.54
MW0055073	Misoprostol	C22H38O5	383.2792	382.2719	0.5428	7.441	59122-46-2	HMDB0015064	D00419	1324	5282381	Lipids and lipid-like molecules	Fatty Acyls	146573.7	83050.66	109077.9	64708.35	70275.8	90630.97	134925.85	142451.7	128321.23	85793.94	177767.69	78937.2
MW0014489	4-Hydroxyacid;4-Hydroxyalkanoic acid;4-Hydroxycarboxylic acid	C4H8O3	146.08100000000002	104.0473	0.7962	1.3593	591-81-1	HMDB0000710	C00989	--	10413	Lipids and lipid-like molecules	Fatty Acyls	898.43	1626.16	1275.22	2930.17	3608.56	2226.19	6125.03	6894.22	4999.6	2116.28	6032.98	6963.01
MEDP1478	4-Pentenoic acid	C5H8O2	201.112	100.0524	0.6625	3.6006	591-80-0	HMDB0031602	-	--	61138	Organic acid And Its derivatives	Organicacid and Its derivatives	58147.51	58404.01	58660.63	65862.72	64377.84	58039.99	61434.15	67086.89	66577.03	66878.99	67479.21	135057.51
MW0155513	Phorbol 12-tiglate 13-decanoate	C35H52O8	623.3552	600.3662	0.6335	8.2771	59086-92-9	--	C09157	--	5281391	Lipids and lipid-like molecules	Prenol lipids	12185.92	10630.45	11525.14	7128.67	7052.16	11437.55	3719.53	2880.86	4401.04	2555.87	3365.28	2034.97
MW0149159	Ferrous lactate	C6H10FeO6	485.9988	233.9827	0.6206	0.5541	5905-52-2	--	C17382	--	22197	Organic acids and derivatives	Carboxylic acids and derivatives	23078.81	19473.42	20706.62	18145.33	16221.27	22413.31	14262.91	12605.09	13843.32	11979.74	15820.18	12086.33
MW0118289	2-Amino-N-cyclopentyl-6-(2-methylbutan-2-yl)-4,5,6,7-tetrahydro-1-benzothiophene-3-carboxamide	C19H30N2OS	398.2238	334.2079	0.6405	4.9684	590360-07-9	--	--	--	4469613	Organoheterocyclic compounds	Thiophenes	5727.35	4799.59	5661.07	5476.88	6427.11	5761.8	5586.83	4944.49	6186.87	4906.71	5179.63	5436.79
MW0118973	3-(2-Cyclohexylethyl)-4-ethyl-1H-1,2,4-triazole-5-thione	C12H21N3S	284.1168	239.1456	0.6371	6.9979	590353-07-4	--	--	--	4987426	Organoheterocyclic compounds	Azoles	3015.47	4245.92	3368.89	3768.99	2237.38	3637.25	4115.71	1439.89	3885.65	4936.4	5981.22	4251.47
MW0111840	1-Methylcyclohexanol	C7H14O	97.1011	114.1045	0.8636	3.8871	590-67-0	HMDB0059693	--	--	11550	Organic oxygen compounds	Organooxygen compounds	17508.44	20326.51	19980.5	19164.08	25615.35	18365.43	19940.92	19430.94	19044.92	23819.83	21361.85	24563.52
MW0009051	Neostigmine cation	C12H19N2O2	469.2766	223.1447	0.5576	3.1413	59-99-4	HMDB0015472	C07258	1490	4456	Benzenoids	Benzene and substituted derivatives	35267.26	74811.09	75671.83	36411.97	77724.67	72090.57	97635.34	79931.98	85277.82	94290.29	84945.71	78519.85
MW0009933	Tolazoline	C10H12N2	321.2061	160.1	0.5838	10.6371	59-98-3	HMDB0014935	C07147	--	5504	Benzenoids	Benzene and substituted derivatives	6995.08	7250.84	5782.13	9133.51	7424.09	6801.37	8041.33	7067.42	7120.19	8616.63	8595.18	7999.91
MW0125865	N-Nitrosomorpholine	C4H8N2O2	271.0841	116.0586	0.5424	6.5553	59-89-2	--	C19283	--	6046	Organoheterocyclic compounds	Oxazinanes	9737.02	7975.2	8781.75	9010.61	8044.46	8546.73	10085.49	9031.92	682.11	8407.22	9106.22	8977.3
MEDN1015	Nicotinic Acid	C6H5NO2	124.0391	123.03200000000001	0.8871	1.1476	59-67-6	HMDB0001488	C00253	--	938	CoEnzyme and vitamins	CoEnzyme and vitamins	35282.31	44237.38	45970.73	41042.31	48699.68	43255.6	49353.53	49654.04	49240.41	54317.04	60098.1	50455.38
MW0007401	Isocarboxazid	C12H13N3O2	270.0641	231.1008	0.5853	4.5822	59-63-2	HMDB0015377	D02580	--	3759	Benzenoids	Benzene and substituted derivatives	7026.29	7801.51	7864.5	7740.16	8219.31	7077.64	8854.74	8858.5	9242.93	9407.75	9000.02	7795.35
MW0007588	Mephenesin	C10H14O3	147.0802	182.0943	0.6379	12.3365	59-47-2	--	D02595	43479	4059	Benzenoids	Phenol ethers	10146.34	19355.29	7199.14	8872.86	13655.72	14832.56	20302.86	7293.92	10539.58	13456.38	12483.01	8899.34
MW0006548	Chloropyramine	C16H20ClN3	331.1679	289.1346	0.612	0.6293	59-32-5	HMDB0015690	D07195	--	25295	Benzenoids	Benzene and substituted derivatives	27406.78	17461.41	23040.76	16007.76	2137.55	15838.04	28200.08	28800.95	41158.54	35507.37	27730.1	39041.99
MW0000228	D-Galactose	C6H12O6	163.0599	180.0634	0.6053	1.6343	59-23-4	HMDB0000143	C00124	134	6036	Organic oxygen compounds	Organooxygen compounds	47601.94	34629.09	76594.25	77256.3	32906.5	44842.23	20378.45	59584.65	26307.96	26628.54	63978.53	66624.57
MW0010793	(+)-α-Tocopherol	C29H50O2	545.2624	430.3811	0.5635	3.6926	59-02-9	--	C02477	--	14985	Lipids and lipid-like molecules	Prenol lipids	4048.48	2348.2	3591.0	11041.02	9547.05	3741.22	26341.77	15517.01	15323.21	10514.07	25665.33	27666.27
MW0114670	Kanamycin	C18H36N4O11	485.2444	484.2381	0.747	8.5115	59-01-8	HMDB0015303	C01822	--	6032	Organic oxygen compounds	Organooxygen compounds	2372.76	1940.05	2899.4	1945.24	1765.97	2244.3	2047.03	2259.69	1290.47	2463.74	2133.72	2363.5
MW0149072	Eugeniin;Tellimagrandin II	C41H30O26	977.0623	938.1025	0.5471	1.1471	58970-75-5	HMDB0039265	C10224	--	442679	Phenylpropanoids and polyketides	Tannins	3581.68	5059.17	4733.19	3828.83	3624.35	3182.94	3854.23	3965.71	2615.88	3112.0	4984.82	1306.57
MW0015051	6-Ketoprostaglandin F1α	C20H34O6	371.2434	370.2355	0.9971	6.9445	58962-34-8	HMDB0002886	C05961	--	5280888	Lipids and lipid-like molecules	Fatty Acyls	130933.38	169710.3	218773.0	113501.9	163192.57	171731.8	98327.97	105656.07	100435.57	143140.06	141808.1	110771.84
MW0103663	Sinefungin	C15H23N7O5	780.3857	381.1761	0.6347	3.2571	58944-73-3	--	D05846	--	65482	Nucleosides, nucleotides, and analogues	5'-deoxyribonucleosides	1150.88	1229.52	2055.12	1058.87	1254.12	989.0	1133.06	1125.13	1208.71	1302.83	1494.61	1066.04
MW0148189	Decarbamoylsaxitoxin	C9H16N6O3	298.1657	256.1284	0.5524	4.7763	58911-04-9	HMDB0038319	C20021	--	21117969	Phenylpropanoids and polyketides	Saxitoxins, gonyautoxins, and derivatives	2478.46	5594.53	4620.14	9856.26	11612.34	5954.65	3967.36	4731.17	178.76	7031.17	4251.24	4099.64
MW0147733	Compactin diol lactone;ML-236A	C18H26O4	307.1901	306.1831	0.6592	6.7458	58889-19-3	--	C14183	--	173651	Organoheterocyclic compounds	Lactones	11034.78	57818.13	47689.14	128695.88	228512.22	142692.48	9921.1	12195.31	10971.41	28673.45	27440.7	12202.22
MW0142358	2H-Pyran-2-one, 6-(2-(1,2,6,7,8,8a-hexahydro-2-methyl-1-naphthalenyl)ethyl)tetrahydro-4-hydroxy-, (1S-(1-alpha(4S*,6S*),2-alpha,8a-alpha))-	C18H26O3	641.3147	290.1882	0.6493	10.2669	58889-18-2	--	C14043	--	173650	Organoheterocyclic compounds	Lactones	2564.51	2116.41	2936.58	1051.41	1647.38	1330.05	1676.09	1445.06	221.36	1141.6	1731.36	1828.29
MW0014136	3-Hydroxyvalproic acid	C8H16O3	125.0961	160.1099	0.6992	2.907	58888-84-9	HMDB0013899	C16651	2988	134459	Lipids and lipid-like molecules	Fatty Acyls	112296.39	56023.79	73378.05	85056.68	77367.77	68488.07	19166.96	22318.82	20957.33	19797.81	22616.1	19793.95
MW0157939	Tinyatoxin	C36H38O8	713.1304	598.2567	0.5918	0.8504	58821-95-7	--	C09201	--	76972186	Lipids and lipid-like molecules	Prenol lipids	1099.13	882.44	1870.18	1973.95	3114.7	1180.12	8753.71	6460.17	6318.99	5039.09	7796.55	8156.24
ZINC12410372	cis-3-Coumaric acid	C9H8O3	129.1464	164.16	0.6287	10.9031	588-30-7	-	-	--	5316112	Phenylpropanoids and polyketides	Cinnamic acids and derivatives	148902.18	53190.11	157917.07	114727.8	127190.79	183114.7	164690.98	95005.9	131292.3	90271.88	181201.46	158285.96
MEDL00352	Glu-Val	C10H18N2O5	248.1321	246.1216	0.9721	1.7543	5879-06-1	HMDB0028832	-	--	6992567	Amino acid and Its metabolomics	Small Peptide	1379.21	3074.37	233.98	2873.37	3191.78	2874.37	3239.22	2084.15	2249.83	3037.67	1890.64	2980.95
MEDN0022	(5-L-Glutamyl)-L-Amino Acid	C8H14N2O5	263.0607	218.09	0.603	0.5548	5875-41-2	HMDB0006248	C03740	--	--	Amino acid and Its metabolomics	Small Peptide	3501.03	4533.16	2939.33	3013.47	4336.64	3630.26	3696.51	4116.42	4097.97	5635.51	4721.3	6058.23
MW0138770	Licochalcone A	C21H22O4	694.3368	338.1518	0.5646	3.4523	58749-22-7	--	--	52227	5318998	Phenylpropanoids and polyketides	Linear 1,3-diarylpropanoids	3733.15	5438.74	1679.15	8990.33	12047.85	9212.04	26552.96	16936.77	18051.07	13131.17	24216.74	27568.13
MW0012171	11β-Misoprostol	C22H38O5	337.274	382.2719	0.7453	9.3804	58717-36-5	--	--	--	72941572	Lipids and lipid-like molecules	Fatty Acyls	1737.47	2533.8	4379.58	2056.75	2817.12	3660.74	1516.67	1359.42	2137.6	2478.05	3459.71	2429.8
MW0108963	O,O-Diethyl hydrogen thiophosphate	C4H11O3PS	214.9878	170.0167	0.6374	1.9901	5871-17-0	HMDB0001460	C06607	--	655	Organic acids and derivatives	Organic thiophosphoric acids and derivatives	168835.57	89964.75	94947.78	101370.02	81250.29	110673.62	120687.38	87244.34	118543.5	67352.24	69514.29	114204.58
MW0137685	cis-3,4',5-Trimethoxy-3'-hydroxystilbene	C17H18O4	287.1241	286.1205	0.7939	5.0855	586410-08-4	--	--	45520	10108048	Phenylpropanoids and polyketides	Stilbenes	19765.16	52420.65	41184.97	147353.98	174561.13	50332.41	12577.69	9447.17	18144.97	12562.12	15986.26	10400.52
MW0010022	Urushiol II	C23H40O2	412.3183	348.3028	0.6243	9.8676	5862-27-1	--	--	--	119222	Benzenoids	Phenols	9303.65	8581.41	20119.55	9295.85	9937.66	5857.36	8931.51	12457.46	4221.27	8299.1	10078.24	8557.15
MW0106567	Dyclonine	C18H27NO2	336.2008	289.2042	0.5704	4.523	586-60-7	HMDB0014783	C07881	4005	3180	Organic oxygen compounds	Organooxygen compounds	8826.36	18897.8	14467.44	13262.99	23121.58	17994.23	14406.31	13090.96	12759.21	12827.62	14070.07	15957.22
MW0104978	3-Aminohexanoic acid	C6H13NO2	263.2005	131.0946	0.5389	7.5296	58521-63-4	HMDB0029168	--	--	5275645	Organic acids and derivatives	Carboxylic acids and derivatives	8820.24	9382.14	6148.72	6506.86	5881.84	7188.91	9937.4	6616.74	5970.08	15295.94	8306.43	10274.45
MEDP1990	Melibiose	C12H22O11	381.0792	342.1162	0.7909999999999999	0.7483	585-99-9	HMDB0000048	C05402	--	872	Carboxylic acids and derivatives	Sugars	598788.23	693176.81	755212.96	409821.73	394102.93	673077.28	329688.25	329791.42	336235.52	351134.62	374165.97	313279.38
MW0115501	α,β-Trehalose	C12H22O11	365.1057	342.1162	0.8089	1.9594	585-91-1	--	--	85165	10871590	Organic oxygen compounds	Organooxygen compounds	50645.62	123084.75	79459.71	164415.47	122260.64	84651.08	71327.44	97645.83	72358.73	40421.39	67137.37	39673.5
MEDN0203	Cis-Aconitic Acid	C6H6O6	175.0235	174.016	0.7725	1.1474	585-84-2	HMDB0000072	C00417	--	643757	Organic acid And Its derivatives	Organicacid and Its derivatives	14690.08	14434.56	16655.1	14490.15	14776.63	13620.49	12996.9	13343.57	14466.15	13638.23	15582.2	13223.41
MW0154300	Narasin B;A28086B	C43H70O11	829.4456	762.4918	0.6295	10.2669	58439-94-4	--	C15834	--	191478	Lipids and lipid-like molecules	Prenol lipids	56371.81	58798.02	61639.75	53125.09	59236.66	36916.73	59309.69	62759.99	119.73	57129.08	62213.97	69214.83
MW0137982	Dihydroresveratrol	C14H14O3	499.1517	230.0943	0.645	0.618	58436-28-5	--	C10255	--	185914	Phenylpropanoids and polyketides	Stilbenes	3451.95	2672.9	4387.73	5001.36	4514.57	1535.21	5863.32	4553.93	5301.13	4936.86	6749.36	2785.09
MW0013107	2,3-Dimercapto-1-propanol tributyrate	C15H26O4S2	317.124	334.1272	0.6431	6.3699	58428-97-0	--	--	--	194061	Lipids and lipid-like molecules	Fatty Acyls	12317.05	8046.66	10122.3	12033.09	9862.82	9052.95	10437.68	11510.82	9241.63	6532.79	11025.72	6781.02
MW0119900	4-(4-Amino-3-nitrophenyl)-1(2H)-phthalazinone	C14H10N4O3	283.0827	282.0753	0.6414	2.4864	58370-64-2	--	--	--	3099471	Organoheterocyclic compounds	Diazines	4629.39	3170.47	8343.11	6146.76	6730.43	6310.89	4101.17	4303.2	1905.46	5442.52	3891.95	4826.67
MW0006547	Chloropropylate	C17H16Cl2O3	339.0528	338.0476	0.5488	2.9014	5836-10-2	--	C19027	--	22094	Benzenoids	Benzene and substituted derivatives	1335.55	4345.53	3133.08	1685.06	1311.71	2313.65	278.23	435.91	468.88	285.6	368.8	133.34
MW0123806	EHNA hydrochloride	C14H23N5O	572.4186	277.1903	0.7015	10.2228	58337-38-5	--	--	85107	24197375	--	--	6892.74	10561.75	18593.83	1026.08	5161.55	14406.69	3160.58	2715.97	2225.32	2185.29	2479.2	617.67
MW0111688	1,2-Benzoquinone	C6H4O2	150.0547	108.0211	0.6351	1.1559	583-63-1	HMDB0012133	C02351	--	11421	Organic oxygen compounds	Organooxygen compounds	1790.44	2423.36	3188.2	883.52	884.96	2419.82	1109.35	685.1	489.78	2076.71	1026.62	811.44
MEDN1129	Erythrose	C4H8O4	85.0284	120.0423	0.65	11.7748	583-50-6	HMDB0002649	C01796	--	94176	Carboxylic acids and derivatives	Sugars	8931.67	8359.99	7645.84	8880.79	3371.45	9714.29	8883.59	5867.29	4439.62	10656.24	5150.57	11277.08
MW0055311	Nicotinuric acid	C8H8N2O3	361.1137	180.0535	0.6076	2.6575	583-08-4	HMDB0003269	C05380	1499	68499	Organic acids and derivatives	Carboxylic acids and derivatives	4301.37	5810.86	4402.73	6894.16	6669.93	5162.45	2845.67	2985.35	2489.67	2631.54	3051.56	2395.49
MW0129697	1,6-Dioxacyclohexadecane-7,16-dione	C14H24O4	295.1297	256.1675	0.7221	5.3594	58296-43-8	--	--	--	94013	Phenylpropanoids and polyketides	Macrolides and analogues	7121.67	4279.67	6447.43	4825.86	2130.67	5763.91	1862.0	2108.72	537.04	2761.67	1904.21	1753.94
MW0147859	Cucurbic acid	C12H20O3	213.1487	212.1412	0.5297	6.1689	58240-50-9	HMDB0029388	C08482	--	5281159	Lipids and lipid-like molecules	Fatty Acyls	252953.55	251683.05	233499.29	286184.65	365568.78	245706.48	277370.63	298959.9	274225.79	290949.28	341950.13	289136.71
MW0114658	Isovalerophenone	C11H14O	209.1166	162.1045	0.5937	3.4945	582-62-7	--	--	265084	68493	Organic oxygen compounds	Organooxygen compounds	3398.58	4028.54	7217.1	6368.62	8242.31	7559.38	5263.01	4259.87	6248.16	4793.94	7497.55	6160.17
MW0151207	Hopane-29-acetate	C32H54O2	436.3975	470.4124	0.7745	10.5172	58193-25-2	--	C08627	--	441680	Lipids and lipid-like molecules	Prenol lipids	4724.06	5432.84	11568.92	7004.16	6621.0	7459.83	4152.81	9814.24	12033.83	10710.06	5901.42	11374.78
MW0054009	Idebenone	C19H30O5	321.2058	338.2093	0.7425	7.0063	58186-27-9	--	D01750	757	3686	Lipids and lipid-like molecules	Prenol lipids	5111.87	7510.04	5010.38	7605.5	7820.49	6100.33	8151.55	8691.52	7627.99	9656.45	13256.21	8264.91
MW0002409	2,6-Dimethylnaphthalene	C12H12	157.1011	156.0939	0.6819	11.8457	581-42-0	HMDB0059764	C14330	--	11387	Benzenoids	Naphthalenes	45039.33	77567.14	56764.23	57513.49	44356.93	45288.99	66212.53	31221.27	8524.49	39485.23	32926.46	68943.86
MW0006920	DMABA NHS Ester	C13H14N2O4	280.1296	262.0954	0.6209	1.9885	58068-85-2	--	--	96490	71312544	Benzenoids	Benzene and substituted derivatives	293.16	1528.14	2333.31	890.42	2640.82	1002.1	901.21	629.69	400.11	837.41	625.64	542.45
MW0111098	Miltefosine	C21H46NO4P	471.3313	407.3164	0.5526	9.1167	58066-85-6	--	D02494	--	3599	Organic nitrogen compounds	Organonitrogen compounds	19402.93	69302.14	92735.94	15706.24	65739.37	63116.16	13504.83	14428.76	14961.72	16223.15	17608.0	12972.17
MW0006105	Averantin	C20H20O7	355.1178	372.1209	0.6992	3.8532	5803-62-3	--	C20499	--	10044783	Benzenoids	Anthracenes	25889.88	34628.49	29044.53	36340.19	37881.21	36116.06	8657.7	8107.62	6357.53	7493.08	10337.54	8652.69
MW0106172	Clavulanic acid	C8H9NO5	217.0824	199.0481	0.6219	2.0777	58001-44-8	HMDB0014904	C06662	--	5280980	Organic acids and derivatives	Carboxylic acids and derivatives	2434.86	2100.88	2601.75	1762.32	1684.63	2407.17	1099.46	977.98	64.54	1262.61	1553.16	972.3
MEDL01843	Matairesinol	C20H22O6	359.1318	358.1416	0.5738	3.1639	580-72-3	HMDB0035698	C10682	--	119205	Lignans and Coumarins	Lignans	8516.7	8398.79	12981.04	8050.56	8670.03	10394.57	6091.71	5182.7	6716.01	3726.51	4585.37	4737.13
MW0103706	Uridine-5'-diphosphate	C9H14N2O12P2	426.9921	404.0022	0.9621	1.2718	58-98-0	HMDB0000295	C00015	--	6031	--	--	17110.33	22080.57	30692.1	25407.66	19498.18	26048.58	18759.46	24821.84	23233.41	26902.92	22256.87	22833.38
MEDN0419	Uridine 5-Monophosphate	C9H13N2O9P	325.0435	324.036	0.8559	1.1408	58-97-9	HMDB0000288	C00105	--	6030	Nucleotide And Its metabolomics	Nucleotide and Its metabolomics	30688.6	28722.0	51226.34	31835.93	24372.49	31843.24	22695.85	23473.99	21838.25	23280.49	19425.09	25191.01
MEDP0179	Uridine	C9H12N2O6	245.0769	244.0695	0.8690000000000001	1.2265	58-96-8	HMDB0000296	C00299	--	6029	Nucleotide And Its metabolomics	Nucleotide and Its metabolomics	51418.52	56851.57	48952.72	33096.97	42970.53	47075.4	21353.18	12907.07	18221.01	17970.16	14823.62	18043.94
MEDP0171	Inosine	C10H12N4O5	269.0885	268.08099999999996	0.8509	1.4528	58-63-9	HMDB0000195	C00294	--	135398641	Nucleotide And Its metabolomics	Nucleotide and Its metabolomics	218418.89	166361.28	201398.88	216530.19	167927.93	189760.64	257018.85	233762.67	216573.82	241672.59	255841.72	277531.89
MEDP0160	Adenosine	C10H13N5O4	268.1052	267.0968	0.8444	1.7983	58-61-7	HMDB0000050	C00212	--	60961	Nucleotide And Its metabolomics	Nucleotide and Its metabolomics	22517523.02	21784066.08	25057878.76	20415102.59	19288890.87	22483652.17	7644005.41	8321594.21	8031323.19	8367456.35	9257214.58	7891142.92
MW0169729	PYRIDOXINE	C8H11NO3	216.0868	169.0739	0.5843	2.4677	58-56-0	--	C00314	--	1054	--	--	2908.81	1540.5	1584.35	2543.79	1523.0	1574.91	1368.48	1228.23	586.86	1920.52	1433.48	1521.19
MW0062189	Promazine	C17H20N2S	285.1438	284.1347	0.6184	7.4843	58-40-2	HMDB0014564	C07379	2131	4926	--	--	3656.27	3351.2	3087.42	3522.97	3230.07	3279.02	4281.53	4900.58	4866.3	3489.2	5873.72	4956.08
MW0126233	Prochlorperazine	C20H24ClN3S	374.1397	373.1379	0.6407	3.8879	58-38-8	HMDB0014577	C07403	--	4917	Organoheterocyclic compounds	Benzothiazines	126449.24	183977.85	179733.33	181668.16	200833.61	172289.55	175499.53	178510.97	170047.14	187040.47	170815.72	175575.95
MW0111735	10,10'-Oxybis(phenoxarsine)	C24H16As2O3	543.9871	501.9531	0.6421	0.5539	58-36-6	--	--	--	6017	Organic oxygen compounds	Organooxygen compounds	5355.11	4563.76	5974.53	3840.35	3558.06	4440.67	3486.48	197.06	2287.19	2745.89	2102.74	1144.02
MW0111010	Dipyridamole	C24H40N8O4	505.3239	504.3173	0.6065	10.0314	58-32-2	HMDB0015110	D00302	2341	3108	Organic nitrogen compounds	Organonitrogen compounds	3487.74	3466.28	3512.15	3893.46	4000.63	3335.64	4392.25	4806.65	4556.19	2807.95	2816.59	3438.03
MW0007582	Menadione	C11H8O2	214.0897	172.0524	0.7607	11.7724	58-27-5	HMDB0001892	C05377	3297	4055	Benzenoids	Naphthalenes	19296.97	16213.87	14039.94	12089.55	9713.54	12626.88	13729.73	7578.62	10922.07	8539.58	7816.11	6387.67
MEDP1188	Testosterone	C27H40O3	377.2833	412.2977	0.609	6.5355	58-22-0	HMDB0000234	C00535	--	6013	Hormones and hormone related compunds	Hormones and hormone related compunds	1487.35	2100.97	2166.48	1513.7	1028.64	682.68	1734.24	1130.95	5749.6	2175.54	1937.06	1501.68
MW0001717	1-tert-Butyl-4,4-diphenylpiperidine	C21H27N	332.1778	293.2144	0.633	4.1668	57982-78-2	--	--	--	68778	Benzenoids	Benzene and substituted derivatives	21097.53	21953.41	24666.63	17007.11	19114.81	26836.85	14808.54	16601.05	18322.33	17314.08	17178.24	17349.14
MW0010748	(+)-5-trans Cloprostenol	C22H29ClO6	447.1537	424.1653	0.7351	3.0498	57968-81-7	--	--	43458	2808	Lipids and lipid-like molecules	Fatty Acyls	5521.24	4315.14	4369.13	4257.14	2507.69	5211.53	1616.37	1924.81	1586.47	1506.09	1630.69	1708.45
MW0141684	1a,1b-dihomo PGF2	C22H38O5	400.3059	382.2719	0.578	9.3811	57944-39-5	--	--	36206	6443812	Lipids and lipid-like molecules	Fatty Acyls	41978.14	61436.23	85727.56	32109.71	50490.38	57116.71	27276.09	28053.95	25518.71	34796.53	35706.89	25169.68
MW0145209	Apodine	C21H22N2O4	750.3477	366.158	0.5629	7.3647	57932-86-2	--	C09034	--	441984	Alkaloids and derivatives	Aspidospermatan-type alkaloids	2081.2	441.71	1159.97	1380.1	315.73	603.44	75.17	322.89	67.73	54.01	375.1	101.6
MW0146642	beta-Cymaropyranose;D-Cymarose;Cymarose;2,6-Dideoxy-3-O-methyl-D-ribo-hexose	C7H14O4	204.1229	162.0892	0.6409	0.8268	579-04-4	--	C08234	--	441417	Organic oxygen compounds	Organooxygen compounds	550.38	2021.36	2295.83	280.93	2292.9	164.33	491.49	212.21	179.91	1145.38	864.69	297.8
MW0010845	(17β)-4-Chloro-17-hydroxy-17-methylandrost-4-en-3-one	C20H29ClO2	337.1991	336.1856	0.6838	7.2939	5785-58-0	--	C15358	--	227107	Lipids and lipid-like molecules	Steroids and steroid derivatives	6095.76	28101.75	28492.8	9083.36	37047.64	28251.37	12811.03	14621.13	14766.87	21916.88	19503.6	16327.88
MW0123751	Domperidone	C22H24ClN5O2	467.1955	425.1619	0.642	3.7246	57808-66-9	HMDB0015315	D01745	--	3151	Organoheterocyclic compounds	Benzimidazoles	40090.31	43678.5	40083.07	47663.47	62787.53	42235.18	28759.91	35578.64	32746.95	29251.5	31621.71	48947.7
MEDN1012	7-Methylguanine	C6H7N5O	166.0722	165.065	0.8866	1.2856	578-76-7	HMDB0000897	C02242	--	135398679	Nucleotide And Its metabolomics	Nucleotide and Its metabolomics	36195.48	40979.0	39131.29	50918.22	42061.41	36700.96	42441.11	51849.66	45086.43	44054.98	65352.06	48086.02
MW0156104	Propenoyl-CoA;Acryloyl-CoA;Acrylyl-CoA	C24H38N7O17P3S	888.0755	821.1258	0.5307	0.6654	5776-58-9	HMDB0002307	C00894	--	9543026	Lipids and lipid-like molecules	Fatty Acyls	8213.57	7730.31	7212.46	5066.94	7757.46	7788.12	12827.44	11936.33	11647.96	12992.48	7017.9	12744.13
MW0123838	Equisetin	C22H31NO4	440.1785	373.2253	0.6446	0.8285	57749-43-6	--	--	--	54684703	Organoheterocyclic compounds	Pyrrolidines	3352.3	2757.0	3018.36	175.88	533.85	3692.23	538.01	166.94	121.18	415.51	88.34	50.14
MW0146376	Aspulvinone H	C27H28O5	903.3515	432.1937	0.6199	8.1896	57744-69-1	HMDB0034472	C02008	--	54675755	Benzenoids	Phenols	1506.92	1494.35	2144.7	597.82	1487.87	1633.46	1191.91	1093.9	527.71	1559.83	1001.9	1049.55
MW0118601	2-Hydroxy-3-methyl-6-(methylamino)-5-nitroso-4(3H)-pyrimidinone	C6H8N4O3	575.1725	184.0596	0.9218	0.6629999999999999	5770-19-4	--	--	--	255443	Organoheterocyclic compounds	Diazines	50042.92	37422.37	51369.23	39060.45	34207.3	46459.55	107845.49	121209.25	36052.72	103743.53	95025.97	107143.12
MEDL02502	3-Hydroxyflavone	C15H10O3	261.0497	238.063	0.6918	2.7186	577-85-5	HMDB0031816	C20871	--	11349	Flavonoids	Flavonols	6594.55	4077.38	5372.99	3427.63	2258.92	5221.47	217.33	473.23	92.12	464.28	661.01	381.01
MW0152003	Kansuinine B	C38H42O14	767.2168	722.2575	0.733	0.6534	57685-46-8	--	C09122	--	442050	Organic acids and derivatives	Carboxylic acids and derivatives	1036.75	1133.12	565.4	324.33	114.09	1091.3	2140.73	301.91	2365.91	410.25	1154.37	1481.84
MW0147056	Cannabisativine	C21H39N3O3	382.3107	381.2991	0.6854	11.4363	57682-64-1	--	C10576	--	100419	Phenylpropanoids and polyketides	Macrolactams	15011.16	14584.38	13422.38	17697.56	15237.64	15434.72	15266.39	14266.57	14961.87	18529.81	18235.03	15468.25
MW0153386	Mancinellin	C36H52O8	676.3806	612.3662	0.5877	7.1757	57672-76-1	--	C09127	--	5281378	Lipids and lipid-like molecules	Prenol lipids	3663.16	4134.51	4496.11	3581.06	3964.13	3723.75	3071.47	3301.14	3602.56	4361.16	3692.77	3261.3
MW0103893	(3E)-3-[(4-Chlorophenyl)imino]-1,3-dihydro-2H-indol-2-one	C14H9ClN2O	257.0474	256.0403	0.7292	5.0709	57644-24-3	--	--	--	135411931	Organic acids and derivatives	Carboxylic acids and derivatives	3364.31	3661.53	2587.66	2326.03	3056.16	2477.51	2077.14	2632.49	409.04	1968.4	2150.75	2215.08
MW0116858	1-Acetylindole	C10H9NO	336.1671	159.0684	0.5104	4.4876	576-15-8	--	--	34502	68470	Organoheterocyclic compounds	Indoles and derivatives	2258.03	94.18	126.65	7829.88	5829.02	55.03	100.48	262.07	59.04	525.5	658.16	357.93
MW0115413	Tri(propylene glycol) butyl ether	C13H28O4	213.1848	248.1988	0.6481	12.4729	57499-93-1	--	--	--	3044557	Organic oxygen compounds	Organooxygen compounds	2915.73	2399.76	2365.21	1965.67	2575.54	6469.71	1568.11	2617.72	237.5	223.23	2048.39	2130.88
MW0127380	6-[(4-Chlorobenzyl)sulfanyl]-1,2,4-triazine-3,5(2H,4H)-dione	C10H8ClN3O2S	576.9681	269.0026	0.8886	0.659	5747-49-9	--	--	--	338292	Organosulfur compounds	Thioethers	13206.34	10488.45	11651.37	15225.82	877.77	12596.35	6272.75	7379.33	8192.39	8288.38	6179.32	7852.96
MW0125895	Norquetiapine	C17H17N3S	608.2625	295.1143	0.6499	5.1592	5747-48-8	--	--	96331	11369918	Organoheterocyclic compounds	Benzothiazepines	23663.54	12378.21	13006.59	20111.41	10761.62	14276.48	12758.2	16093.57	13300.52	13744.31	13044.06	14926.89
MW0103419	6-Thioinosine	C10H12N4O4S	326.0897	284.0579	0.639	5.9471	574-25-4	HMDB0060791	--	--	3005838	Nucleosides, nucleotides, and analogues	Purine nucleosides	31686.06	32096.81	33033.05	35099.59	31192.52	31378.65	28054.71	28892.27	29343.49	29789.37	30544.84	29195.71
MW0015487	9-Oxoprosta-10,12Z,14E-trienoic acid	C20H30O3	301.2161	318.2195	0.6566	8.072000000000001	573951-20-9	--	--	36218	16061103	Lipids and lipid-like molecules	Fatty Acyls	8974.87	10347.38	11336.69	6048.48	9282.17	9636.25	6474.22	5776.1	5271.83	7851.73	13286.36	5917.46
MW0063775	Testosterone decanoate	C29H46O3	443.3343	442.3447	0.5518	11.4363	5721-91-5	--	C14607	--	155143	Lipids and lipid-like molecules	Steroids and steroid derivatives	51187.05	146435.13	59186.74	64483.62	120654.12	46146.34	53952.81	82998.57	96565.78	36211.82	52482.21	50114.74
MW0005684	5-Hydroxydopamine	C8H11NO3	216.0867	169.0739	0.8809	2.2086	5720-26-3	HMDB0004817	--	--	114772	Benzenoids	Phenols	1869.69	2403.57	2469.13	1736.34	2688.18	2541.14	1036.34	1542.22	612.22	1275.03	1668.66	1371.13
MW0061670	Phytonadiol	C31H48O2	497.3372	452.3654	0.6228	6.0214	572-96-3	HMDB0060502	C03313	--	5280585	Lipids and lipid-like molecules	Prenol lipids	1448.6	1312.35	1165.42	887.66	1757.45	1482.17	2642.39	2740.48	2099.11	2907.35	2902.05	2837.99
MW0005126	4-Hydroxytolbutamide	C12H18N2O4S	309.0831	286.0987	0.7065	13.6701	5719-85-7	HMDB0006408	--	2869	3656	Benzenoids	Benzene and substituted derivatives	1543.38	1163.33	1931.41	1632.46	1220.78	1515.92	1933.22	1848.84	3231.62	1799.76	3279.88	9838.04
MW0116785	1-[4-(2-Methoxyphenyl)-1-piperazinyl]-3-(1-naphthyloxy)-2-propanol	C24H28N2O3	415.1942	392.21	0.6403	5.0121	57149-07-2	--	D01674	--	4418	Organoheterocyclic compounds	Diazinanes	19157.29	35509.09	20639.25	16892.14	24890.83	44262.86	23420.76	22255.22	22870.45	21385.73	26745.47	36977.31
MW0154356	Neoabietadiene	C20H32	319.2673	272.2504	0.5952	7.5738	57119-12-7	--	C11880	--	443472	Lipids and lipid-like molecules	Prenol lipids	167.67	1577.35	1591.52	183.0	1620.52	1562.65	323.81	251.3	182.74	768.19	414.84	659.9
MW0015772	Androst-5-ene-3,17-dione	C19H26O2	333.2066	286.1933	0.9988	7.4115	571-36-8	HMDB0062415	C20252	--	160531	Lipids and lipid-like molecules	Steroids and steroid derivatives	367248.22	1178674.9	737415.08	1327326.17	1468509.7	874425.7	131676.2	155899.28	155933.43	896375.26	221446.37	141890.29
MW0014734	5beta-Dihydrotestosterone	C19H30O2	338.2409	290.2246	0.9135	6.9792	571-22-2	HMDB0006770	C05293	--	11302	Lipids and lipid-like molecules	Steroids and steroid derivatives	14581.66	15894.72	13567.21	10674.57	14324.05	15838.86	11593.06	10370.67	11148.37	14774.97	14801.19	12470.99
MW0152705	-Linolenoyl Ethanolamide	C20H35NO2	344.2563	321.2668	0.9757	9.2782	57086-93-8	--	--	36742	5283449	Organic nitrogen compounds	Organonitrogen compounds	165.21	104.9	253.67	26.1	35.96	148.9	2361.55	2285.12	3637.61	2635.35	3451.66	2401.52
MW0011680	(Z)-4-Decen-1-ol	C10H20O	179.1431	156.1514	0.7438	6.0514	57074-37-0	HMDB0032206	--	--	5362798	Lipids and lipid-like molecules	Fatty Acyls	259215.24	246976.25	251011.7	256603.34	248948.37	243833.2	271766.39	271662.29	256664.84	285638.94	325543.2	284952.88
MEDL01878	Methyl dioxindole-3-acetate	C11H11NO4	481.0989	221.0676	0.6177	1.8708	57061-18-4	HMDB0038991	-	--	14033762	Others	Others	1583.02	305.06	715.45	286.81	55.37	321.77	1025.67	1423.54	262.63	1027.66	1469.52	586.54
MW0127498	Isomethiozin	C12H20N4OS	269.1359	268.1358	0.6359	3.6435	57052-04-7	--	C19107	--	9576097	Organosulfur compounds	Thioethers	13897.4	15830.19	13685.94	16844.28	17702.68	21716.1	17889.18	17180.25	16521.87	24728.64	22343.58	29410.46
MW0007980	N-(2-Bromo-4-chlorophenyl)acetamide	C8H7BrClNO	532.8453	246.94	0.5292	0.6891	57045-85-9	--	--	--	282685	Benzenoids	Benzene and substituted derivatives	12118.51	11538.73	14138.7	17115.28	16656.13	12040.65	12544.0	12182.69	9948.86	12823.53	8333.42	13692.63
MW0118270	2-Amino-6-methoxy-4-phenyl-3,5-pyridinedicarbonitrile	C14H10N4O	292.1194	250.0855	0.6372	0.6137	57021-26-8	--	--	--	910533	Organoheterocyclic compounds	Pyridines and derivatives	639.04	561.02	959.74	580.84	377.92	601.17	1630.07	1902.84	2158.94	1010.15	121.81	1272.33
MW0141842	1-tert-Butoxy-2-propanol;1-(1,1-Dimethylethoxy)-2-propanol;Propylene glycol mono-t-buthyl ether	C7H16O2	97.1011	132.115	0.6489	11.8072	57018-52-7	--	C19356	--	92629	Organic oxygen compounds	Organooxygen compounds	16027.66	23312.19	12682.57	18765.24	19295.63	16830.68	1895.97	20754.67	14297.42	17261.92	18876.01	10684.08
MW0109994	Tolclofos-methyl	C9H11Cl2O3PS	600.9167	299.9544	0.612	0.6893	57018-04-9	--	C18407	--	91664	Organic acids and derivatives	Organic thiophosphoric acids and derivatives	945.81	1834.13	1163.7	4044.39	3144.59	2805.05	1093.6	2387.73	2386.98	2472.71	965.05	1104.06
MW0017071	Cholest-5-ene	C27H46	415.3315	370.36	0.6378	10.0609	570-74-1	HMDB0000941	C05416	--	440663	Lipids and lipid-like molecules	Steroids and steroid derivatives	80299.87	56831.53	15407.29	58966.21	63702.72	74349.56	17714.14	53441.19	48809.28	45422.88	58123.95	47545.06
MW0149096	Europine;9-Lasiocarpylheliotridine	C16H27NO6	376.1965	329.1838	0.6437	4.6721	570-19-4	--	C10301	--	5462451	Alkaloids and derivatives	--	1659.56	1850.91	2093.43	2306.81	1903.85	1985.86	2364.35	2482.66	2021.55	2087.58	2589.93	2453.83
MEDP1243	4-Hydroxytryptamine	C10H12N2O	199.0806	176.095	0.6940000000000001	0.5485	570-14-9	-	C21762	--	11297	Tryptamines,Cholines,Pigments	Tryptamines	1681.63	1433.8	1134.76	2355.71	2508.98	3046.2	1250.27	886.91	1371.9	1323.76	659.42	1634.67
MW0005845	7,12-Dimethylbenz[a]anthracene	C20H16	257.1383	256.1252	0.5345	4.5074	57-97-6	HMDB0062429	C19488	--	6001	Benzenoids	Phenanthrenes and derivatives	17156.44	7303.79	7723.6	1920.02	2945.59	13526.95	1585.1	1489.57	3474.8	1339.9	2009.58	1736.24
MW0052607	Ergosterol	C28H44O	397.3462	396.3392	0.8012	11.2185	57-87-4	HMDB0000878	C01694	--	444679	Lipids and lipid-like molecules	Steroids and steroid derivatives	1285.4	158.05	1732.04	508.19	881.22	1507.19	1143.07	195.03	119.96	2499.1	3595.38	5110.57
MEDP0189	Progesterone	C21H30O2	315.2321	314.2246	0.5689	8.6287	57-83-0	HMDB0001830	C00410	--	5994	Hormones and hormone related compunds	Hormones and hormone related compunds	5608.08	5883.35	7871.41	3903.82	4424.26	6042.94	3431.19	3894.31	3609.8	4102.86	4446.0	3185.62
MW0012168	11β-Hydroxyandrosterone	C19H30O3	307.2271	306.2195	0.5715	7.2049	57-61-4	HMDB0002984	C14606	--	10286365	Lipids and lipid-like molecules	Steroids and steroid derivatives	61179.54	96680.36	59684.83	73676.72	72912.36	79271.52	88893.68	93195.5	87776.31	100026.83	149157.92	89817.09
MW0115178	Propylene glycol	C3H8O2	121.0284	76.0524	0.6619	11.7764	57-55-6	HMDB0001881	C00583	--	1030	Organic oxygen compounds	Organooxygen compounds	98632.87	115823.13	85570.07	90609.61	96709.96	92299.31	67124.45	68755.77	63479.23	126209.13	107680.08	109612.0
MW0108136	Meprobamate	C9H18N2O4	285.0787	218.1267	0.5668	5.4116	57-53-4	HMDB0014515	D00376	--	4064	Organic acids and derivatives	Carboxylic acids and derivatives	10189.92	11232.76	9808.06	7268.83	7215.38	10966.37	10646.96	7367.33	3880.84	6575.59	8029.38	7722.97
MEDL02396	D-(+)-sucrose	C12H22O11	365.1056	342.1162	0.8365	0.9272	57-50-1	HMDB0125600	C00089	--	5988	Others	Saccharides and Alcohols	553645.33	548301.79	472539.12	375838.0	630126.0	525781.87	445149.0	497254.02	437144.56	432854.83	462898.15	459494.02
MW0158077	Tris(2-methyl-1-aziridinyl)phosphine oxide;Metepa	C9H18N3OP	448.2728	215.1187	0.5501	6.545	57-39-6	--	C19556	--	60976	Organic acids and derivatives	Organic phosphoric acids and derivatives	2387.59	753.95	2416.51	2480.25	1476.36	2366.54	3574.88	3422.48	3420.24	3540.84	4750.12	3341.45
MW0000452	Strychnine	C21H22N2O2	412.095	334.1681	0.8047	9.6312	57-24-9	--	C06522	3463	441071	Alkaloids and derivatives	Strychnos alkaloids	371.22	8.04	313.21	7.51	259.54	294.84	189.44	231.36	188.07	15.08	11.97	2.59
MW0000482	Vincristine	C46H56N4O10	825.4079	824.3996	0.6122	8.1896	57-22-7	HMDB0014681	--	--	5388993	Alkaloids and derivatives	Vinca alkaloids	3587.42	3498.56	4874.06	2162.62	3196.97	3872.56	2733.13	2232.59	2766.04	2754.95	3503.38	2489.12
MW0141055	1,1-Dimethylhydrazine	C2H8N2	83.0491	60.0687	0.5176	13.3366	57-14-7	--	C19233	--	5976	Organic nitrogen compounds	Organonitrogen compounds	2702.86	2830.21	3289.72	1435.86	10293.77	5324.76	4966.6	8179.17	875.15	8013.0	6122.22	7028.33
MW0052792	FA 18:0	C18H36O2	354.2695	284.2715	0.9676	11.0665	57-11-4	HMDB0000827	C01530	--	5281	Lipids and lipid-like molecules	Fatty Acyls	7541.96	9380.62	8638.46	8814.11	9075.54	5877.46	7492.87	6973.16	8900.37	7352.88	5493.36	6855.51
MW0150781	Hexadecanoic Acid(C16:0)	C16H32O2	326.2408	256.24	0.9122	8.248	57-10-3	HMDB0000220	C00249	--	985	Lipids and lipid-like molecules	Fatty Acyls	6425.83	8315.82	11950.28	4001.89	6570.59	7867.59	5626.88	5269.34	6283.62	6784.44	7867.87	5630.12
MEDL00393	CETRIMONIUM	C19H41N	350.2776	283.3239	0.6132	9.1606	57-09-0	-	D07664	--	2681	-	-	299049.86	345372.78	486411.03	204482.69	291177.72	345487.16	199403.67	201050.63	190372.39	244161.32	247192.11	201643.36
MW0151269	Hydroxystenozole;17alpha-Methyl-2'H-androsta-2,4-dieno[3,2-c]pyrazol-17beta-ol	C21H30N2O	365.1994	326.2358	0.6216	3.542	5697-57-4	--	C15033	--	238684	Lipids and lipid-like molecules	Steroids and steroid derivatives	9181.11	10967.7	11426.28	10436.61	10484.35	10733.92	6776.04	10402.65	7755.76	9031.92	9759.79	7485.47
MW0016395	Carbenoxolone	C34H50O7	637.3092	570.3557	0.6388	4.4187	5697-56-3	--	D07615	--	636403	Lipids and lipid-like molecules	Prenol lipids	2174.22	1001.49	2859.39	1101.56	638.66	1556.6	372.03	193.32	142.33	534.41	382.87	684.26
MW0153328	Malachite green	C23H25N2.Cl	751.3345	364.1706	0.9197	4.2391	569-64-2	--	C18367	--	11294	Benzenoids	Benzene and substituted derivatives	41770.15	36637.76	56116.25	33058.1	34399.97	42055.38	24958.2	23162.06	24036.0	28036.19	39559.61	21937.69
MW0001569	1-Fluoroanthra-9,10-quinone	C14H7FO2	453.0931	226.043	0.6373	2.1238	569-06-2	--	--	--	68436	Benzenoids	Anthracenes	2670.11	3392.09	3756.8	4623.5	4021.88	4908.84	4780.3	4798.63	5107.7	4445.64	4106.22	3368.52
MW0116311	1-(2-Chloroethyl)-2-methyl-1H-imidazole	C6H9ClN2	145.0495	144.0454	0.7154	13.3231	56894-20-3	--	--	--	117085	Organoheterocyclic compounds	Azoles	2276.33	5505.15	2354.55	2229.78	2401.59	2271.79	1419.47	1866.64	2616.17	3817.42	2586.17	3034.11
MW0168940	cis-7-Hexadecenoic Acid methyl ester	C17H32O2	233.2264	268.2402	0.5687	11.8139	56875-67-3	--	--	44957	14029831	--	--	18386.14	14876.43	15075.75	9336.64	12378.03	12957.5	14566.47	3745.91	15454.58	15037.36	14382.67	17122.11
MW0009037	N-Desmethylselegiline	C12H15N	364.2695	173.1204	0.5216	6.2452	56862-28-3	--	--	--	200718	Benzenoids	Benzene and substituted derivatives	6667.88	39646.54	41594.68	9540.28	39677.94	37432.54	10548.65	11709.98	8945.09	12767.26	13609.82	11348.39
MW0115358	Therafectin	C14H27NO6	369.1996	305.1838	0.6488	7.5742	56824-20-5	--	D02911	44328	9798098	Organic oxygen compounds	Organooxygen compounds	14488.09	24702.85	29294.31	12310.61	26957.76	24814.77	13331.99	14142.16	13247.24	13699.93	16337.28	14308.59
MW0102864	trans,cis-3,6-Nonadien-1-ol	C9H16O	123.1166	140.1201	0.8005	5.5449	56805-23-3	HMDB0038067	--	--	44630408	Lipids and lipid-like molecules	Fatty Acyls	20789.89	11018.12	4006.93	22572.57	18988.98	19286.18	19946.63	20377.75	20070.49	21314.57	25863.57	21899.2
MW0063732	Tanshinone I	C18H12O3	334.0248	276.0786	0.7282	1.9983	568-73-0	--	--	--	114917	Lipids and lipid-like molecules	Prenol lipids	876.6	737.63	159.55	2160.2	1327.26	483.48	1957.82	2183.82	2638.97	1666.29	2224.29	2535.16
MW0010553	alpha-Peltatin	C21H20O8	401.1273	400.1158	0.5132	7.1032	568-53-6	--	C10729	--	92129	Lignans, neolignans and related compounds	Lignan lactones	7157.75	9460.7	12655.57	5076.25	8451.95	8379.55	4328.76	4388.12	4743.76	4767.3	5089.54	4970.85
MW0106130	Cefmetazole	C15H17N7O5S3	943.0953	471.0453	0.5644	1.2383	56796-20-4	HMDB0014419	C08103	--	42008	Organic acids and derivatives	Carboxylic acids and derivatives	4389.82	4824.72	4997.48	4294.39	3882.77	2752.06	3530.74	2685.45	2892.57	4194.59	4370.95	2619.13
MW0011860	1,2-Di-(9Z-tetradecenoyl)-sn-glycero-3-phosphocholine	C36H68NO8P	658.4099	673.4683	0.6289	10.9775	56750-90-4	HMDB0007900	--	--	24778648	Lipids and lipid-like molecules	Glycerophospholipids	44499.44	58892.1	24720.43	37435.61	54359.86	45574.84	31384.6	26339.57	39884.94	32036.33	42854.7	34073.27
MW0120616	4-Methyl-5,6,7,8-tetrahydroquinoline-8-carbothioamide	C11H14N2S	245.0481	206.0878	0.7358	4.9388	56717-18-1	--	--	--	3037235	Organoheterocyclic compounds	Quinolines and derivatives	3380.75	5048.87	4286.93	3710.24	3800.33	3828.99	2793.8	2290.93	4837.32	3119.24	2184.54	2692.09
MW0140103	(+)-Cloprostenol methyl ester	C23H31ClO6	403.1617	438.1809	0.6153	4.5963	56687-85-5	--	--	64695	11732885	Lipids and lipid-like molecules	Fatty Acyls	6411.08	3640.34	2777.24	21577.12	12726.74	4278.12	6565.91	6106.56	7051.97	6102.63	9570.04	7100.42
MW0103898	(3-Phenylpropionyl)glycine	C11H13NO3	209.1004	207.0895	0.9851	4.3154	56613-60-6	HMDB0000860	--	5823	152323	Organic acids and derivatives	Carboxylic acids and derivatives	19946.53	4520.51	3828.49	19730.83	3705.2	2984.92	70.76	80.52	16.05	3235.16	82.37	17.31
MW0017075	Cholesta-4,6-dien-3-one	C27H42O	429.32099999999997	382.3236	0.5396	8.5962	566-93-8	HMDB0002394	--	--	3034666	Lipids and lipid-like molecules	Steroids and steroid derivatives	105388.0	26805.84	135202.48	84513.04	25332.73	25786.43	18351.33	20795.78	36452.08	21207.9	24851.21	19379.41
MW0017077	Cholestan-3-one, (5α)-	C27H46O	433.3678	386.3549	0.5147	11.3239	566-88-1	HMDB0000871	C03238	--	92128	Lipids and lipid-like molecules	Steroids and steroid derivatives	45391.11	64262.02	85330.05	98025.24	126182.51	40270.53	100.94	26843.24	33833.86	70384.81	82248.73	58772.37
MW0015641	Allopregnane-3alpha,20alpha-diol	C21H36O2	303.2685	320.2715	0.9435	9.1749	566-58-5	HMDB0060409	C18042	--	164674	Lipids and lipid-like molecules	Steroids and steroid derivatives	2991.72	4565.78	6881.25	2324.97	3176.98	4363.86	2508.44	2406.09	2419.78	2983.38	3177.92	2251.57
MW0143978	7-keto DHEA	C19H26O3	303.1921	302.1882	0.5967	3.2148	566-19-8	--	--	263488	193313	Lipids and lipid-like molecules	Steroids and steroid derivatives	5250.59	163.99	6944.96	8320.6	842.09	7491.62	23474.13	22871.93	19927.4	9112.07	24218.48	27770.93
MW0054298	L-Bornyl acetate	C12H20O2	197.1539	196.1463	0.7797	6.0514	5655-61-8	HMDB0040397	--	--	93009	Lipids and lipid-like molecules	Prenol lipids	601731.38	580019.31	567061.71	599647.06	569564.48	554010.46	633579.16	653975.82	595262.69	694708.83	780969.02	680557.99
MW0116500	1-(Cyclohexylcarbonyl)-4-piperidinylamine	C12H22N2O	252.2064	210.1732	0.602	4.7912	565453-24-9	--	--	--	16771849	Organoheterocyclic compounds	Piperidines	5311.8	7844.73	4622.28	5518.04	4982.89	5226.44	5435.78	6862.08	5615.82	5963.65	6271.43	6977.55
MW0110608	1-[5-(Trifluoromethyl)-2-pyridinyl]-4-piperidinamine	C11H14F3N3	491.2353	245.114	0.6486	6.0512	565453-20-5	--	--	--	4778234	Organic nitrogen compounds	Organonitrogen compounds	2968.44	2854.92	2909.57	2953.1	3376.14	2704.52	2899.13	2410.2	680.8	3159.7	3163.19	2470.63
MW0106206	Cyclo(leucylprolyl)	C11H18N2O2	211.1476	210.1368	0.5414	11.8191	5654-86-4	HMDB0034276	--	--	102892	Organic acids and derivatives	Carboxylic acids and derivatives	40891.42	34787.92	90270.75	37509.75	55591.08	56705.71	56200.41	33795.56	75672.79	35217.36	61113.42	40653.89
MW0151728	Indoleamine;Indolamine	C8H8N2	265.1445	132.0687	0.6337	3.2591	56480-48-9	--	C01819	--	122074	Organoheterocyclic compounds	Indoles and derivatives	1806.97	1871.2	1904.96	4415.77	3748.84	1990.15	743.81	937.72	1646.5	1735.13	668.11	781.0
MW0003915	3-Chloro-4-(trifluoromethoxy)benzyl alcohol	C8H6ClF3O2	227.0082	226.0008	0.8985	0.5687	56456-48-5	--	--	--	2773848	Benzenoids	Phenol ethers	213392.02	205180.25	225117.99	217668.75	214214.91	212487.08	186557.47	181668.54	190455.14	171955.05	205133.61	190999.54
MW0126519	Sclareolide	C16H26O2	233.1937	250.1933	0.6457	6.1406	564-20-5	HMDB0035293	--	85004	929262	Organoheterocyclic compounds	Naphthofurans	13582.43	13006.78	11309.66	12114.94	6587.08	7036.32	15946.78	18068.27	14963.35	15858.04	19768.0	16016.64
MW0006000	alpha-Hydroxymetoprolol	C15H25NO4	284.1859	283.1784	0.5968	3.9760000000000004	56392-16-6	HMDB0060994	--	--	114962	Benzenoids	Phenol ethers	161825.98	134818.38	129326.33	188693.12	161120.7	138301.14	189968.55	206357.61	181793.73	265998.56	251185.05	199696.78
MW0154393	Netilmicin	C21H41N5O7	498.2899	475.3006	0.6498	5.5836	56391-56-1	HMDB0015090	C07657	--	441306	Organic oxygen compounds	Organooxygen compounds	237.14	2314.97	2581.04	500.56	684.89	1428.67	849.18	1068.05	1471.66	1624.48	1738.89	1290.92
MW0006850	Dimethindene	C20H24N2	315.1804	292.1939	0.5737	5.7397	5636-83-9	HMDB0015691	D07853	--	21855	Benzenoids	Indenes and isoindenes	15945.6	17452.79	18141.12	18326.11	21218.83	17734.15	22889.49	22107.74	18425.46	25924.56	25308.21	22815.37
MW0116826	11-nor-9-carboxy-Delta(9)-tetrahydrocannabinol	C21H28O4	345.2038	344.1988	0.774	7.6314	56354-06-4	HMDB0062770	--	96631	108207	Organoheterocyclic compounds	Benzopyrans	361.27	12837.85	9928.9	28857.82	39965.21	10235.26	650.42	724.23	87.87	14276.98	2554.66	1066.21
MEDN1549	Hydroumbellic acid	C9H10O4	200.0918	182.0579	0.6497	13.8228	5631-68-5	HMDB0126386	-	--	96384	Benzene and substituted derivatives	Phenolics	11494.97	14123.72	10614.05	9823.93	14393.62	8592.18	6598.35	6047.2	8507.05	8450.24	7746.71	4399.28
MW0000036	(6R,6aR,13S,13aS)-1,3,4,6,6a,7,8,9,10,12,13,13a-Dodecahydro-2H-6,13-methanodipyrido[1,2-a	C15H24N2	271.1532	232.1939	0.7468	3.3881	56293-29-9	--	C10748	--	442937	Alkaloids and derivatives	Lupin alkaloids	4417.45	3537.12	3607.95	1994.84	1825.03	1560.56	1194.57	3316.31	2610.93	1803.65	2694.95	1058.36
MEDL01784	Anigorufone	C19H12O2	567.1579	272.0843	0.6459999999999999	3.5354	56252-32-5	HMDB0033935	-	--	636472	Others	Others	4980.54	9945.49	4444.9	7197.84	6255.42	4998.98	9992.77	17394.34	6529.33	4578.77	9919.48	7465.9
MW0115828	(2-Aminoethyl)[2-(piperidin-1-yl)ethyl]amine	C9H21N3	157.1584	171.1735	0.5748	0.2519	5625-69-4	--	--	--	79725	Organoheterocyclic compounds	Piperidines	1699.11	1902.68	1686.53	2222.85	2610.97	2098.46	2297.96	2280.39	2645.46	2947.49	2555.71	2056.51
MW0055183	Myristoleic Acid methyl ester	C15H28O2	241.2163	240.2089	0.6444	12.4801	56219-06-8	--	--	44859	5352674	Lipids and lipid-like molecules	Fatty Acyls	6870.4	1643.87	1247.1	1764.45	1623.43	2087.9	1188.2	1227.57	2240.98	1706.6	1511.2	1591.05
MW0148933	ent-Kaurene;ent-Kaur-16-ene	C20H32	311.2216	272.2504	0.6864	8.1014	562-28-7	HMDB0035394	C06090	--	11966109	Lipids and lipid-like molecules	Prenol lipids	62133.03	87758.7	84355.09	51730.63	82827.36	79928.49	49916.7	48683.18	45938.42	67998.37	68364.94	50070.3
MW0113836	Acarbose	C25H43NO18	692.2610000000001	645.248	0.6396	7.4266	56180-94-0	HMDB0014429	C06802	--	41774	Organic oxygen compounds	Organooxygen compounds	1953.57	2193.67	1431.69	675.53	1035.7	1682.82	2652.67	2987.41	2452.69	2453.47	2220.93	3305.86
MW0114582	Heptaethylene glycol	C14H30O8	327.2015	326.1941	0.6427	10.7357	5617-32-3	HMDB0061835	--	--	79718	Organic oxygen compounds	Organooxygen compounds	4744.7	4625.9	3802.01	6086.2	4484.0	5290.24	10876.35	6470.58	6294.21	4761.83	5827.41	6889.92
MW0002951	2-Chloro-N-(4-methoxyphenyl)nicotinamide	C13H11ClN2O2	227.0367	262.0509	0.6234	4.5822	56149-30-5	--	--	--	840301	Benzenoids	Benzene and substituted derivatives	2070.47	1981.73	1801.0	1712.07	1794.47	1678.37	2305.08	2260.27	1827.3	2281.01	2017.8	1801.24
MW0105946	Asperglaucide	C27H28N2O4	508.2204	444.2049	0.6316	10.267000000000001	56121-42-7	--	--	--	9832120	Organic acids and derivatives	Carboxylic acids and derivatives	2260.42	2264.14	2552.65	2121.25	2661.76	1844.49	3030.32	3130.58	3574.67	3019.09	2839.91	2911.28
MW0104962	3-Amino-2-hydroxyheptanoic acid	C7H15NO3	162.1121	161.1052	0.6197	0.7337	561066-93-1	--	--	--	4471903	Organic acids and derivatives	Carboxylic acids and derivatives	21459.36	18985.31	16055.97	18046.07	22514.14	21294.58	9187.39	10317.05	9394.61	14509.95	10964.86	12562.92
MW0000250	Ergosine	C30H37N5O5	548.2812	547.2795	0.5611	2.8505	561-94-4	--	C09167	--	105137	Alkaloids and derivatives	Ergoline and derivatives	37074.6	40775.3	39883.1	53911.3	55769.37	41391.74	87192.51	70397.62	72669.47	63334.93	85042.33	84436.0
MEDP0550	18-Hydroxycorticosterone	C21H30O5	363.2143	362.2093	0.7031	8.0279	561-65-9	HMDB0000319	C01124	--	11222	Hormones and hormone related compunds	Hormones and hormone related compunds	76490.14	105385.79	129051.81	48448.54	101376.65	114383.43	80992.53	80506.89	85633.86	127043.18	114999.3	84376.95
MW0151759	Ionomycin	C41H72O9	709.5257	708.5176	0.614	0.5638	56092-81-0	--	--	96378	6912226	Lipids and lipid-like molecules	Prenol lipids	505.7	131.55	822.01	912.63	1728.56	1000.05	803.09	854.08	69.12	390.09	1277.16	104.85
MW0006824	Difenacoum	C31H24O3	445.1534	444.1725	0.5493	6.7551	56073-07-5	--	C16807	--	54676884	Benzenoids	Naphthalenes	6651.86	7789.56	10970.54	4629.51	6908.27	8109.67	4646.45	5200.39	5234.66	5829.42	6229.29	4992.16
MW0007610	Methanesulfonamide, N-[2-(N-ethyl-4-nitroso-m-toluidino)ethyl]-	C12H19N3O3S	894.2923	285.1147	0.9037	0.8667	56046-62-9	--	--	--	41694	Benzenoids	Benzene and substituted derivatives	11177.66	15630.94	13669.34	23091.14	23210.42	14892.49	6843.37	11698.51	11508.93	5966.41	10789.26	10278.84
MW0118221	2-Amino-4,6-dichloropyrimidine-5-carbaldehyde	C5H3Cl2N3O	173.9613	190.9653	0.8466	0.4476	5604-46-6	--	--	--	265546	Organoheterocyclic compounds	Diazines	215191.67	260936.89	201161.24	203312.01	238954.82	184854.32	229345.38	186485.33	193519.61	235267.75	181749.1	197301.37
MW0115322	Sucralose	C12H19Cl3O8	418.9922	396.0146	0.6176	1.7841	56038-13-2	--	C12285	69411	71485	Organic oxygen compounds	Organooxygen compounds	1051.65	788.74	982.02	1152.03	1305.72	1246.33	1384.43	2964.88	3298.34	1190.93	1119.48	3087.28
MW0147846	Cryptophorine	C17H27NO	300.1727	261.2093	0.6301	0.5547	56022-14-1	--	C10139	--	5281684	Organoheterocyclic compounds	Piperidines	4114.08	4348.72	4973.81	4715.45	4301.47	5317.35	4727.43	6847.41	5378.79	5422.41	5796.99	5727.01
MW0148853	Eburicoic acid	C31H50O3	534.3929	470.376	0.5877	9.7335	560-66-7	--	C14495	--	73402	Lipids and lipid-like molecules	Prenol lipids	4567.79	9228.57	17892.67	2435.14	3738.71	8697.17	3162.97	2843.31	2511.74	2840.02	2070.24	1596.28
MEDP1609	4-(Aminomethyl)benzoic acid	C8H9NO2	152.0704	151.0633	0.6247	2.2284	56-91-7	-	D07568	--	65526	Organic acid And Its derivatives	Organicacid and Its derivatives	16033.5	11382.14	9978.31	16718.24	11775.55	12894.32	20017.54	19445.19	15196.5	17803.69	20439.59	19385.64
MEDP0011	L-Lysine	C6H14N2O2	147.1128	146.1055	0.8553	0.6295	56-87-1	HMDB0000182	C00047	--	5962	Amino acid and Its metabolomics	Amino acids	357454.8	350022.48	388345.04	409810.88	345899.58	339696.06	593001.27	598336.67	596425.05	561107.95	656016.61	599739.79
MEDN0011	L-Glutamic Acid	C5H9NO4	148.0601	147.0532	0.8495	0.7628	56-86-0	HMDB0000148	C00025	--	33032	Amino acid and Its metabolomics	Amino acids	86889.67	72947.02	82597.03	94316.43	86546.28	78434.17	80579.38	89627.64	93391.33	86759.45	92750.29	81416.81
MW0121542	5-Hydroxy-L-tryptophan	C11H12N2O3	441.1773	220.0848	0.5898	0.7315	56-69-9	HMDB0000472	--	--	25243949	--	--	163504.05	129505.36	137423.46	223983.5	235724.49	120018.9	195110.1	186370.07	10296.9	10581.31	11664.62	245869.15
MEDL02011	Quinidine	C20H24N2O2	325.1994	324.1838	0.6894	6.6132	56-54-2	HMDB0015044	C06527	--	1065	Alkaloids	Quinoline alkaloids	72264.96	387827.46	406978.19	538209.66	445924.97	499810.38	120071.14	143596.32	102968.89	168598.26	145908.75	117687.45
MW0143048	3-Methylcholanthrene	C21H16	269.1355	268.1252	0.6004	5.3517	56-49-5	--	C14470	--	1674	Benzenoids	Phenanthrenes and derivatives	1738.33	13282.59	12982.85	18378.95	28990.32	15889.72	2459.74	2622.91	640.26	3398.57	2609.35	1486.11
MW0158034	Tributyltin oxide;TBTO	C24H54OSn2	581.2186	598.2219	0.6489	5.3515	56-35-9	--	C18149	--	16682746	--	--	2425.98	482.13	3142.53	1817.16	2279.07	2320.37	3283.43	2544.55	2112.22	2427.28	2336.46	2673.09
MW0127429	Cystamine	C4H12N2S2	191.0008	152.0442	0.7383	12.4807	56-17-7	--	--	55	2915	Organosulfur compounds	Organic disulfides	2123.3	1330.9	1572.6	1861.51	2491.1	1562.69	1536.95	1673.13	2079.98	1357.83	3358.35	2332.04
MW0117890	2,4-Diamino-6-hydroxypyrimidine	C4H6N4O	109.0509	126.0542	0.6497	1.1576	56-06-4	HMDB0002128	--	--	135408763	Organoheterocyclic compounds	Diazines	3607.81	2138.15	2895.74	1541.73	1582.04	2857.33	603.49	18.2	592.56	36.93	166.34	206.4
MW0125790	Nicardipine	C26H29N3O6	452.186	479.2056	0.5922	5.2409	55985-32-5	HMDB0014760	C07264	--	4474	Organoheterocyclic compounds	Pyridines and derivatives	2765.24	1880.39	1354.57	1468.89	3073.21	1894.56	2657.39	2431.25	2888.85	693.84	2646.02	1956.87
MEDL02576	FFA(20:2)	C20H36O2	355.2831	308.2716	0.5777	11.4384	5598-38-9	HMDB0005060	C16525	--	--	Lipids	Free fatty acids	31521.03	34546.99	29305.28	28358.61	31788.38	26264.63	30514.48	33276.61	36422.26	30420.6	32967.5	30783.1
MW0121388	5-Chloro-7-(4-morpholinylmethyl)-8-quinolinol	C14H15ClN2O2	342.098	278.0822	0.6485	9.3211	5596-37-2	--	--	--	683337	Organoheterocyclic compounds	Quinolines and derivatives	1902.07	766.81	1493.41	1236.98	993.01	1615.26	1044.71	2477.56	2669.99	1154.38	1113.0	2323.09
MW0123382	Clebopride	C20H24ClN3O2	391.1897	373.1557	0.6427	3.593	55905-53-8	--	D03534	44055	2780	Organoheterocyclic compounds	Piperidines	2635.81	3441.47	3115.55	2164.26	2534.77	4149.9	929.03	703.98	939.95	3026.59	2572.59	2272.53
MW0122809	Althiazide	C11H14ClN3O4S3	788.9579	382.9835	0.5857	0.9095	5588-16-9	--	D02838	44278	2122	Organoheterocyclic compounds	Thiadiazines	1835.73	1647.32	2103.01	842.57	368.77	1282.3	5418.75	2536.37	4907.33	6132.89	4495.22	3137.88
MW0015095	6β-Hydroxydexamethasone	C22H29FO6	409.2012	408.1948	0.7389	3.0835	55879-47-5	--	--	--	63050	Lipids and lipid-like molecules	Steroids and steroid derivatives	5736.0	5857.84	4058.09	2889.38	2254.68	4856.21	1284.35	2492.14	1118.78	6463.64	3003.64	1456.44
MW0124515	Isouron	C10H17N3O2	423.2715	211.1321	0.6467	10.5904	55861-78-4	--	C18432	--	41648	Organoheterocyclic compounds	Imidolactams	4532.17	4472.5	4461.55	5223.68	4356.49	1786.36	7871.55	6305.91	6589.03	8027.79	5475.1	5258.56
MW0140696	(S)-N1-((1H-Benzo[d]imidazol-2-yl)methyl)-N1-(5,6,7,8-tetrahydroquinolin-8-yl)butane-1,4-diamine	C21H27N5	391.26	349.2266	0.6197	6.9397	558447-26-0	--	C20266	--	11256587	Organoheterocyclic compounds	Quinolines and derivatives	31847.35	40992.1	52078.89	23854.65	37246.64	43253.89	24197.03	25017.67	23904.16	26706.16	30490.82	23050.25
MW0159464	Zizyphine F	C32H47N5O6	642.3241	597.3526	0.6419	5.1445	55839-64-0	--	C10016	--	11953941	Organic acids and derivatives	Carboxylic acids and derivatives	2395.98	990.35	830.84	1879.9	1632.6	2073.65	2552.37	1840.35	437.37	1600.39	1525.92	1576.85
MW0114019	Buflomedil	C17H25NO4	308.1856	307.1784	0.6488	3.378	55837-25-7	--	D07176	--	2467	Organic oxygen compounds	Organooxygen compounds	2460.64	4711.99	4742.44	3166.82	3703.97	5794.09	11490.17	5984.55	6951.32	7683.75	15204.12	6500.02
MW0120945	5',6',7',8'-Tetrahydro-1'H-spiro[cyclohexane-1,4'-quinazoline]-2'(3'H)-thione	C13H20N2S	201.1217	236.1347	0.5835	3.1392	5579-43-1	--	--	--	793656	Organoheterocyclic compounds	Diazanaphthalenes	1314.16	3866.32	5161.84	549.95	5159.4	3076.77	5438.66	4986.78	2117.04	5021.28	3609.72	2332.87
MW0001356	1,4-Benzenedimethanamine, N1,N4-di-2-pyridinyl-	C18H18N4	291.1605	290.1531	0.6483	2.0475	55778-02-4	--	--	45578	11565518	Benzenoids	Benzene and substituted derivatives	1737.23	1367.82	2671.03	1347.71	935.7	1511.16	829.6	825.67	370.85	1045.37	850.19	466.31
MW0123958	Ethyl 3-[2-(1,3-dioxo-1,3-dihydro-2H-isoindol-2-yl)ethyl]-5-methoxy-1H-indole-2-carboxylate	C22H20N2O5	823.2437	392.1372	0.6993	2.8898	55747-53-0	--	--	--	1416485	Organoheterocyclic compounds	Indoles and derivatives	886.5	2917.41	1406.07	1691.35	3015.84	1330.53	2246.39	2237.05	1497.36	1425.69	2834.45	2510.39
MW0010965	(24R)-24,25-Dihydroxycalciol	C27H44O3	820.2447	401.1045	0.5852	0.6561	55721-11-4	HMDB0006226	C07712	--	5283748	Lipids and lipid-like molecules	Steroids and steroid derivatives	1240.0	2836.38	4752.85	6160.03	2786.95	3012.92	13946.41	12746.88	14696.79	12651.35	13827.83	13868.48
MW0063789	Tetracosanoic acid	C24H48O2	436.3119	368.3654	0.5565	10.0608	557-59-5	HMDB0002003	C08320	--	11197	Lipids and lipid-like molecules	Fatty Acyls	92611.62	110081.36	131683.04	78108.49	96330.96	83457.33	77219.19	79965.51	80764.83	77795.17	86508.03	80012.39
MW0118049	2,6-Pyridinediamine, N6-[2-[[4-(2,4-dichlorophenyl)-5-(1H-imidazol-2-yl)-2-pyrimidinyl]amino]ethyl]-3-nitro-	C20H17Cl2N9O2	486.0953	485.0882	0.6326	1.8844	556813-39-9	--	--	--	9957049	Organoheterocyclic compounds	Diazines	3216.77	3816.78	4044.49	2931.46	3637.64	3078.03	1326.7	987.81	87.86	1957.28	421.44	312.47
MW0117359	2-(1H-Benzimidazol-1-yl)ethanamine	C9H11N3	184.0836	161.0953	0.6751	13.869000000000002	55661-34-2	--	--	--	41504	Organoheterocyclic compounds	Benzimidazoles	9616.37	11003.54	10222.95	8886.78	10386.81	10236.36	7670.06	11755.25	12317.83	11121.43	9939.94	17341.81
MW0127081	Octamethylcyclotetrasiloxane	C8H24O4Si4	297.0825	296.0752	0.6477	12.6772	556-67-2	--	--	--	11169	Organometallic compounds	Organometalloid compounds	87575.94	154823.67	109407.05	417402.03	112196.98	117490.37	168783.92	93981.05	61327.26	135600.27	203385.56	146771.23
MW0150586	Glyodin;Glyodin acetate	C20H40N2.C2H4O2	410.3735	368.3403	0.6053	11.3442	556-22-9	--	C18940	--	11159	--	--	9860.69	11341.72	10570.47	13037.2	9873.62	10358.71	10660.16	11670.8	12215.42	11160.09	9445.04	8586.61
MW0154561	N-Nitrosoguvacoline	C7H10N2O3	143.0851	170.0691	0.7438	13.1804	55557-02-3	--	C19482	--	62103	Alkaloids and derivatives	--	675.4	530.92	658.65	504.14	484.33	587.97	578.65	1833.65	898.6	549.88	1214.08	622.57
MW0111329	Trichlormethine	C6H12Cl3N	185.9975	203.0035	0.6628	1.5190000000000001	555-77-1	--	C19305	44062	5561	Organic nitrogen compounds	Organonitrogen compounds	1072.84	257.13	142.81	44.18	51.04	890.42	7.91	6.03	10.77	2.88	1.19	4.49
MW0120675	4-Phenyl-8-quinolinamine	C15H12N2	243.0908	220.1	0.6886	6.9977	55484-55-4	--	--	--	108726	Organoheterocyclic compounds	Quinolines and derivatives	3470.25	3994.24	4096.6	4191.24	4342.73	3787.49	5517.19	5630.25	4310.05	5228.51	4964.8	6136.8
MW0110538	(4,6-Dimethyl-2-pyrimidinyl)cyanamide	C7H8N4	319.1392	148.0749	0.6419	3.1234	55474-90-3	--	--	--	521618	Organic nitrogen compounds	Organonitrogen compounds	7905.3	6729.49	10472.88	5067.74	6782.3	8682.33	3637.22	3889.16	2164.51	4659.94	5097.32	3503.45
MEDP1685	Phytosphingosine	C18H39NO3	318.3009	317.293	0.6718	5.7536	554-62-1	HMDB0004610	C12144	--	122121	SL	SM	218078.1	172479.59	193422.91	199187.65	297384.16	232735.17	234112.54	212587.54	276170.31	245121.73	277368.22	285327.2
MEDL00810	5-Methylcytosine	C5H7N3O	251.1252	125.0589	0.6049	6.688	554-01-8	HMDB0002894	C02376	--	65040	Nucleotides and derivatives	Nucleotides and derivatives	6846.33	7312.74	8138.17	8040.59	9317.27	9636.57	5372.64	5874.85	401.86	10214.41	6342.77	6031.69
MW0103939	(4S)-4-Hydroxy-L-isoleucine;Hydroxyisoleucine	C6H13NO3	112.0755	147.0895	0.6448	0.6281	55399-93-4	--	C20802	--	6918732	--	--	2159.94	899.57	2053.81	1534.61	2892.26	839.1	3721.45	6086.03	5327.89	1240.43	4501.54	4286.44
MW0123129	Bisabolol oxide B	C15H26O2	307.1908	238.1933	0.9581	7.1137	55399-12-7	HMDB0038197	C16774	--	117301	Organoheterocyclic compounds	Tetrahydrofurans	19511.37	27795.32	34319.3	16563.95	18447.25	29146.5	14186.87	13492.02	14377.83	14889.47	16824.11	14801.18
MW0016058	Beclomethasone 17-propionate	C25H33ClO6	503.161	464.1966	0.7745	0.5636	5534-18-9	--	--	--	62965	Lipids and lipid-like molecules	Steroids and steroid derivatives	4679.92	4643.26	6381.17	5826.54	5953.53	6375.97	4849.77	4677.8	4413.0	5676.88	5151.55	5306.72
MW0016060	Beclomethasone dipropionate	C28H37ClO7	543.2209	520.2228	0.6802	2.8332	5534-09-8	HMDB0014538	C07813	--	21700	Lipids and lipid-like molecules	Steroids and steroid derivatives	7245.11	6247.02	5292.56	6507.76	2914.33	7607.94	6684.81	7129.23	9050.73	14592.36	6413.02	6292.32
MW0150603	Gnidicin	C36H36O10	646.2647	628.2308	0.6497	9.0291	55319-39-6	--	C09095	--	70691946	Lipids and lipid-like molecules	Prenol lipids	1819.39	1634.03	1189.82	2573.26	3013.68	1766.26	1927.56	1985.65	2143.5	2694.55	2668.04	1998.95
MW0150605	Gnididin	C37H44O10	649.3074	648.2934	0.9092	5.0854	55306-11-1	--	C09096	--	5476509	Lipids and lipid-like molecules	Prenol lipids	11065.75	12517.37	12439.23	10682.75	12781.92	14096.24	14186.06	14732.4	12980.22	13449.08	16467.68	13311.85
MW0063507	Sericoside	C36H58O11	631.3803	666.3979	0.7331	10.0754	55306-04-2	HMDB0034504	--	--	76972524	--	--	3514.7	3447.61	3911.02	2410.14	4141.15	4474.6	3849.07	2922.93	4494.22	3314.75	5526.79	4552.98
MW0122892	Antrafenine	C30H26F6N4O2	924.2689	588.196	0.7091	11.2337	55300-29-3	HMDB0015488	--	--	68723	Organoheterocyclic compounds	Diazinanes	51645.71	91672.21	151397.14	45622.24	115189.86	108665.4	170628.17	20084.57	157422.16	245644.47	266494.59	234486.47
MW0123228	Carbosulfan	C20H32N2O3S	783.4155	380.2134	0.6287	7.7783	55285-14-8	--	C18416	72224	41384	Organoheterocyclic compounds	Coumarans	4265.52	5145.94	6125.73	3421.94	3882.49	5330.55	4031.37	4289.82	804.82	3604.92	3796.55	4278.92
MW0122983	Austocystin A	C19H13ClO6	419.0532	372.0401	0.627	0.5786	55256-58-1	--	--	--	21119330	Organoheterocyclic compounds	Benzopyrans	6417.69	4793.47	6262.62	4407.61	3923.89	5909.26	4784.98	63.21	7337.86	6144.89	4407.49	2704.08
MW0010775	(+)-Dihydrocervone	C10H16O	153.1272	152.1201	0.6682	11.7779	5524-05-0	--	C11398	41125	22227	Lipids and lipid-like molecules	Prenol lipids	276018.04	293915.77	296169.19	359042.27	315546.35	255470.93	238118.74	221757.41	249077.5	341419.07	313634.58	345760.16
MEDL01977	Pseudopelletierine	C9H15NO	200.1281	153.1154	0.5828	5.1445	552-70-5	HMDB0034580	C10865	--	11096	Alkaloids	Alkaloids	15039.76	22428.58	17066.09	29548.37	32076.01	20528.29	30656.95	33134.1	28096.34	20710.76	40846.33	33579.42
MW0147030	Calycanthidine	C23H28N4	361.2437	360.2314	0.7139	2.0327	5516-85-8	HMDB0030281	C09097	--	442031	Organoheterocyclic compounds	Indoles and derivatives	2948.76	3077.38	2290.49	3459.92	3096.38	2503.98	4210.16	3960.14	3381.06	3679.64	4283.85	3238.97
MW0114378	D-Xylulose	C5H10O5	133.0494	150.0528	0.7473	1.3638	551-84-8	HMDB0001644	--	63099	5289590	Organic oxygen compounds	Organooxygen compounds	13174.46	7054.78	13933.36	7412.09	9055.71	9967.89	6828.49	5105.47	718.35	10625.49	8248.2	7403.67
ZINC13859683	(2R)-7-Hydroxy-2-[4-[(2S,3R,4S,5S,6R)-3,4,5-trihydroxy-6-(hydroxymethyl)oxan-2-yl]oxyphenyl]-2,3-dihydrochromen-4-one	C21H22O9	465.4115	418.398	0.6031	11.4642	551-15-5	-	-	--	92461015	Phenylpropanoids and polyketides	Flavonoids	1933.04	54664.34	125524.31	627178.57	15792.14	210714.18	218645.62	120661.57	184005.01	285694.77	245548.69	149369.53
MEDN0795	PGF2α	C20H34O5	399.207	354.2406	0.7139	9.5129	551-11-1	-	-	--	--	Oxidized lipids	Oxidized lipids	4534.19	4553.97	3569.13	4819.4	5132.71	4496.08	4972.47	5451.85	5549.22	7122.57	4971.34	5190.57
MW0154261	Nalmefene	C21H25NO3	340.1963	339.1834	0.5355	4.0163	55096-26-9	--	C08027	--	5284594	Benzenoids	Phenanthrenes and derivatives	3367.43	5020.59	4952.55	4829.57	10704.78	5268.55	21246.91	19989.82	20507.39	22075.82	18328.5	21868.94
MW0124276	Guineensine	C24H33NO3	384.2503	383.246	0.6937	2.6616	55038-30-7	--	--	--	6442405	Organoheterocyclic compounds	Benzodioxoles	1768.9	2652.17	5355.23	2859.05	2665.07	3784.34	2897.95	2846.8	3476.51	3683.75	3279.21	1574.88
MW0154492	Nicotinic acid adenine dinucleotide phosphate;Nicotinate-adenine dinucleotide phosphate;NAADP	C21H28N6O18P3	787.1004	745.0673	0.8712	0.6739	5502-96-5	--	C13051	--	123952	Nucleosides, nucleotides, and analogues	(5'->5')-dinucleotides	52315.29	34077.5	38061.55	68827.6	1338.04	40618.38	119588.56	100156.96	124036.08	122809.26	30804.92	127103.95
[truncated: 8,622 more rows]

## Sheet: Negative ion mode
Table S2: Compounds identified from CmRJ-Zj and BnRJ-Zj in negative ion mode
[truncated: 6,780 more rows]
