# Supplementary material for: Royal jelly from different floral sources possesses distinct wound-healing mechanisms and ingredient profiles
Source: Royal Society of Chemistry journal article supplement (doi:10.1039/d1fo00586c), 2021-01-01
Supplement: d1fo00586c6.xlsx [file d1fo00586c6.xlsx]

## Sheet: Sheet1
Table S3: Differential compounds in CmRJ-Zj and BnRJ-Zj
Index	Compounds	Formula	Precursor (g/mol)	Mass (g/mol)	Score	RT (min)	Class.I	Class.II	VIP	p value	Fold Change	Log2FC	Type
MW0150931	His Glu Tyr Lys	C26H37N7O8	576.2766	575.2704	0.6562	2.1895	--	--	1.3522649020537298	0.0065177908868050355	117.44816830368994	6.875880403339484	up
MEDP1574	3-Methyloxindole	C9H9NO	148.0755	147.0684	0.6332	4.3149	Heterocyclic compounds	Indole and Its derivatives	1.0989897133029891	0.04492500617155571	78.48169764413402	6.29428434383855	up
MW0057020	PC(18:1(9Z)/18:1(9Z))	C44H84NO8P	787.6043	461.3353	0.7222	8.6879	Lipids and lipid-like molecules	Glycerophospholipids	1.0984008322462282	0.04543230376077807	64.87180179617575	6.019519604711918	up
MW0150138	Glu Ser Gln Arg Gln	C24H42N10O11	647.3134	646.3035	0.7722	2.2113	--	--	1.2151127124118266	0.018829169854282662	33.949116207811215	5.085302112385225	up
MW0008766	N1,N1-dimethyl-4-[[4-(dimethylamino)phenyl](4-nitrophenyl)methyl]aniline	C23H25N3O2	376.2121	375.1947	0.5788	7.0138	--	--	1.2749110026770385	0.015902920085500562	31.13168412182497	4.960311718867126	up
MW0006001	alpha-hydroxysalmeterol	C25H37NO5	432.2734	1409.0348	0.5026	8.1307	Benzenoids	Benzene and substituted derivatives	1.465859195773742	0.0016704586773568044	21.97241071826653	4.457621259618478	up
MW0006056	Antazoline	C17H19N3	310.1291	265.1579	0.5836	1.9653	Benzenoids	Benzene and substituted derivatives	1.2201864296040457	0.02139881994309434	19.734974661443225	4.302682761783255	up
MW0006210	Benzenepropanoic acid, 5-(3-carboxybenzoyl)-2-[[(5E)-6-(4-methoxyphenyl)-5-hexen-1-yl]oxy]-	C30H30O7	523.1702	502.1992	0.5038	2.9169	Benzenoids	Benzene and substituted derivatives	1.3282561916712659	0.006882808410677829	17.990840615886476	4.1691906924849595	up
MW0154136	N1,N5,N10-Tricaffeoyl spermidine	C34H37N3O9	632.2595	631.253	0.6671	4.4694	Phenylpropanoids and polyketides	Cinnamic acids and derivatives	1.0954769804422515	0.04689943298444303	16.968273101446222	4.084767840984652	up
MEDP1991	N6-Isopentenyladenosine	C15H21N5O4	336.1676	335.1594	0.9119	2.7426	Nucleotide And Its metabolomics	Nucleotide and Its metabolomics	1.6501335402964683	4.1126342092166364e-06	16.571198124469017	4.0506060104063275	up
MW0000341	Morphine-6-glucuronide	C23H27NO9	527.1916	461.1686	0.96	2.9102	Alkaloids and derivatives	Morphinans	1.5231928174080067	0.0009243468187054236	16.245718485681437	4.021987644821782	up
MW0006306	Benzyl butyl phthalate	C19H20O4	642.3122	312.1362	0.5431	3.2595	Benzenoids	Benzene and substituted derivatives	1.3122049761591583	0.009311260766435438	15.665109930454829	3.9694829887945766	up
MW0160144	butanedioate	C4H4O4-2	120.038	116.011	0.953	1.1618	Organic acids and derivatives	Carboxylic acids and derivatives	1.4470881744113104	0.002634408190657227	15.125181115987205	3.918880512882669	up
MEDN0207	6-Hydroxymelatonin	C13H16N2O3	536.2079	248.1161	0.6632	4.3146	Hormones and hormone related compunds	Hormones and hormone related compunds	1.2907951163542242	0.01327416072661046	15.012739822237293	3.9081153874520034	up
MW0129933	1-O-Cinnamoylglucose	C15H18O7	328.1391	310.1053	0.5820000000000001	1.9621	Phenylpropanoids and polyketides	Cinnamic acids and derivatives	1.214836037729155	0.021856082765863087	14.861308745729241	3.8934892657997535	up
MW0149575	Gibberellin A44 diacid;Gibberellin A44 open lactone	C20H28O6	348.1889	364.1886	0.9792	7.3533	Lipids and lipid-like molecules	Prenol lipids	1.2073187217536865	0.024952030568992783	14.766047241027634	3.8842117741400974	up
MW0055290	Neriifolin	C30H46O8	552.3524	534.3193	0.5714	9.8116	Lipids and lipid-like molecules	Steroids and steroid derivatives	1.561084140823974	0.00045664262859136797	13.67610671143389	3.773585679824236	up
MW0006879	Dinoseb	C10H12N2O5	479.1438	240.0746	0.7617	2.9103	Benzenoids	Phenols	1.33394081538778	0.006345023081709317	13.584314816432984	3.763869893729273	up
MW0158619	Tyr Thr Asp	C17H23N3O8	439.1816	397.1485	0.5463	2.2186	--	--	1.2871411274227516	0.011347039953039723	13.466698189678464	3.7513242642254223	up
MW0136703	6-Hydroxyflavone	C15H10O3	239.0685	238.063	0.5322	2.7203	Phenylpropanoids and polyketides	Flavonoids	1.444456620810879	0.0036144056605164994	12.425649420907545	3.635249350444629	up
MW0166741	[(2R,3S,4R,5R,6R)-6-[(2S,3S,4S,5R)-3,4-dihydroxy-2,5-bis(hydroxymethyl)oxolan-2-yl]oxy-4,5-dihydroxy-2-(hydroxymethyl)oxan-3-yl] 2-methylbutanoate	C17H30O12	491.1953	426.1737	0.8937	1.9588	Lipids and lipid-like molecules	Saccharolipids	1.1584774100733903	0.030506908022524537	12.4177638438473	3.634333495350147	up
MW0110294	Tyrosyl-Threonine	C13H18N2O5	324.1613	1395.0192	0.6365	2.2139	Organic acids and derivatives	Carboxylic acids and derivatives	1.2734172272877309	0.012346117595425534	12.360327310030033	3.627645042199626	up
MW0052652	Estra-4,9-diene-3,17-dione	C18H22O2	541.3344	270.16200000000003	0.5469	2.7169	Lipids and lipid-like molecules	Steroids and steroid derivatives	1.3410908509515072	0.00731792467317454	12.191308801898256	3.607781110152315	up
MW0141486	16-Epivellosimine	C19H20N2O	274.1365	292.1576	0.5842	4.5031	Alkaloids and derivatives	Macroline alkaloids	1.0364670787607146	0.04296200308143072	12.022001916414833	3.5876052500380666	up
MW0156678	Ser Asp Glu	C12H19N3O9	350.1216	349.1121	0.6358	1.9588	--	--	1.2115355523027354	0.021666924862767858	11.996516881118932	3.5845436834072326	up
MW0159140	Val Pro Glu Pro Lys	C26H44N6O8	569.3081	568.3221	0.7455	6.6144	--	--	1.3069204722124008	0.0105949809136017	11.524374549572736	3.5266165497749467	up
MW0110304	Tyr-Ser	C12H16N2O5	535.203	268.1059	0.7597	4.7063	Organic acids and derivatives	Carboxylic acids and derivatives	1.2901043280341284	0.00929818108517832	11.410331328177215	3.5122687794655842	up
MW0155986	Pro Pro Val	C15H25N3O4	353.2149	311.1845	0.5726	3.4632	--	--	1.4287018004966052	0.002590712250104619	11.295528249680164	3.4976798366562782	up
MW0132598	3',4'-Dimethoxy-2'-hydroxychalcone	C17H16O4	569.2115	284.1049	0.6406	2.9092	Phenylpropanoids and polyketides	Linear 1,3-diarylpropanoids	1.5124393935352922	0.00134859335945634	11.082969642540302	3.4702725931097387	up
MW0159232	Val Val Asn	C14H26N4O5	699.3339	330.1903	0.5138	2.8491	--	--	1.273383240385783	0.012552558476736256	10.912331322034602	3.4478874483759854	up
MW0144566	Ala Glu Lys Ala	C17H31N5O7	418.2296	417.2223	0.5763	2.0995	--	--	1.249960957858885	0.014902008715528062	10.086301038694364	3.33432528503648	up
MW0136702	6-Hydroxyflavanone	C15H12O3	481.1596	240.0786	0.677	2.9097	Phenylpropanoids and polyketides	Flavonoids	1.4409701840177975	0.0035394286930719118	10.011637969047186	3.323606122657925	up
MW0144975	alpha-Kosin	C25H32O8	459.2189	460.2097	0.6022	1.8779	Benzenoids	Benzene and substituted derivatives	1.1452325346889063	0.020234192267910484	9.872060242617698	3.3033511983224826	up
MW0062176	Prieuranin acetate	C40H52O17	805.291	804.3205	0.5859	3.9904	Lipids and lipid-like molecules	Prenol lipids	1.382677813157977	0.0059121060400115786	9.772483627007643	3.2887252623997365	up
MW0109198	Phenylalanyl-Arginine	C15H23N5O3	322.1883	1549.1913	0.6861	3.4557	Organic acids and derivatives	Carboxylic acids and derivatives	1.4180624761939655	0.00354290840187433	9.546417748076776	3.254959469628321	up
MW0137088	7-Methoxy-2-methylisoflavone	C17H14O3	531.1754	1451.0818	0.7319	4.0077	Phenylpropanoids and polyketides	Isoflavonoids	1.2876593402808334	0.00948310897825684	9.409344971347421	3.2340942936784534	up
MW0149493	GDP-3,6-dideoxy-D-galactose	C16H25N5O14P2	620.1017	573.0873	0.5372	1.4928	--	--	1.6437125162145243	3.4385249524306647e-06	9.391103189057231	3.2312946437040138	up
MW0145454	Arg Met Thr	C15H30N6O5S1	407.2142	406.1998	0.5343	2.0645	--	--	1.3203072402867078	0.008706820043666096	9.383492350562417	3.230124965291312	up
MW0123554	D-Erythronic acid γ-lactone	C4H6O4	119.0351	118.0266	0.6604	1.1576	Organoheterocyclic compounds	Lactones	1.5438980922263028	0.0007084683296537933	9.285078003895356	3.21491403028566	up
MW0145473	Arg Phe Val	C20H32N6O4	421.2679	420.2485	0.7489	7.0236	--	--	1.40735472497712	0.0037135944216917494	9.274786284500848	3.2133140386236745	up
MW0126947	Vidarabine	C10H13N5O4	533.1812	267.0968	0.5495	4.015	Nucleosides, nucleotides, and analogues	Purine nucleosides	1.2247217461266109	0.014578825357418463	9.263828937383323	3.2116086132723867	up
MW0103441	Abacavir	C28H38N12O6S	287.1642	670.2758	0.684	6.6438	Nucleosides, nucleotides, and analogues	Nucleoside and nucleotide analogues	1.0691361439466958	0.04386299843403415	9.237429643023859	3.20749147099929	up
MEDN1408	Adrenosterone	C19H24O3	347.1856	300.1725	0.5631	7.3531	Hormones and hormone related compunds	Hormones and hormone related compunds	1.2090686429347053	0.02449118163082652	9.047701760768373	3.1775513745806228	up
MW0125887	Norharmane	C11H8N2	169.0761	168.0687	0.8179	2.8217	Organoheterocyclic compounds	Indoles and derivatives	1.163189768429853	0.02828641788037968	8.881198551411906	3.1507543868789485	up
MW0105749	Arg-Thr	C10H21N5O4	317.1902	275.1594	0.5925	2.5242	Organic acids and derivatives	Carboxylic acids and derivatives	1.1681846027812235	0.022246302123474924	8.86397452439125	3.147953734998651	up
MW0126847	trans-Zeatin	C10H13N5O	461.2352	219.112	0.7729	1.8955	Organoheterocyclic compounds	Imidazopyrimidines	1.3118304456469736	0.009070229897989123	8.834043172550748	3.143073882940968	up
MW0151764	Ipsdienone;2-Methyl-6-methyleneocta-2,7-dien-4-one	C10H14O	340.1822	150.1045	0.7001	6.4366	Lipids and lipid-like molecules	Prenol lipids	1.5410376831957555	0.0005813267278218323	8.791586749298817	3.1361235736450643	up
MW0126589	Staurosporine	C28H26N4O3	467.2126	466.2005	0.5451	3.0232	Organoheterocyclic compounds	Indoles and derivatives	1.1985659138180176	0.02315075514815425	8.697144976325527	3.1205418832043588	up
MW0105935	Aspartyl-Tyrosine	C13H16N2O6	297.1017	1535.1757	0.5447	1.5104	Organic acids and derivatives	Carboxylic acids and derivatives	1.2684003915214819	0.012363045456963923	8.670051785785342	3.116040610618112	up
MW0122605	8-Desoxygartanin	C23H24O5	799.2847	380.1624	0.5778	4.0158	Organoheterocyclic compounds	Benzopyrans	1.3442356309776695	0.009077195295600134	8.561386107467417	3.097844391075049	up
MEDN1153	Dehydrocholic acid	C24H34O5	403.2547	402.2406	0.524	2.3011	Bile acids	Bile acids	1.299231334516623	0.010211377887402107	8.496352244192309	3.086843579044035	up
MW0123447	Cyclic Pifithrin-a	C16H16N2S	537.221	268.1034	0.5032	4.3113	Organoheterocyclic compounds	Azoles	1.3033499065564291	0.012798813299733177	8.493351486771559	3.0863339553374187	up
MW0013517	2-Hydroxyestradiol	C18H24O3	290.1835	288.1725	0.979	6.7907	Lipids and lipid-like molecules	Steroids and steroid derivatives	1.10870282604142	0.0349453766691724	8.373299674607853	3.065796259107458	up
MW0114922	N,N',N''-Triacetylchitotriose	C24H41N3O16	691.2662	627.2487	0.7499	2.2525	Organic oxygen compounds	Organooxygen compounds	1.284699630724213	0.014479681831836087	8.358002299326625	3.0631581555527205	up
MEDP1673	Ile-Ile-Thr	C16H31N3O5	328.2236	345.2264	0.6531	2.515	Amino acid and Its metabolomics	Small Peptide	1.1394285002238411	0.030104526659765006	8.246171982112426	3.0437245503786983	up
MW0155262	Phe Leu Val Gly Gly	C24H37N5O6	492.2921	491.2744	0.6523	2.4425	--	--	1.5326823673642596	0.00024032149049241369	8.175888519105163	3.031375524794292	up
MW0146543	Barbinine;Aconitan-14-one, 7,8-dihydroxy-20-ethyl-4-(((2-(3-methyl-2,5-dioxo-1-pyrrolidinyl)benzoyl)oxy)methyl)-1,6,16-trimethoxy-,(1-alpha,4(S),6-beta,16-beta)-	C36H46N2O10	665.2807	666.3152	0.5775	3.2561	Lipids and lipid-like molecules	Prenol lipids	1.3020183092587532	0.00988145133144782	8.129127436093372	3.0231005046767625	up
MW0111073	Leukotriene B4 ethanolamide	C22H37NO4	402.2634	379.2723	0.7365	4.582	Organic nitrogen compounds	Organonitrogen compounds	1.2045993957078096	0.01871012330212286	7.990916340437871	2.9983609504628768	up
MW0152995	Lys His Phe Arg	C27H42N10O5	587.3503	586.3340000000002	0.7525	1.9148	--	--	1.3226244807653065	0.00853084987584401	7.977171553963338	2.9958773042914157	up
MW0063252	Quassin	C22H28O6	389.1941	388.1886	0.6461	6.7127	Lipids and lipid-like molecules	Prenol lipids	1.1364378199633656	0.03399990714848123	7.9552090356577585	2.9918998401408117	up
MW0161663	(8R,10S,13S)-13-methyl-3,17-dioxo-2,6,7,8,9,11,12,14,15,16-decahydro-1H-cyclopenta[a]phenanthrene-10-carbaldehyde	C19H24O3	348.1855	300.1725	0.8204	6.7757	Lipids and lipid-like molecules	Steroids and steroid derivatives	1.090368356444994	0.038214231926969586	7.846690806144617	2.9720843528414025	up
MW0153812	Methyl gibberellin A4	C20H26O5	347.1822	346.17800000000005	0.7731	6.7763	Lipids and lipid-like molecules	Prenol lipids	1.097699950076604	0.037366449497107004	7.822609662563151	2.9676499782699146	up
MW0000978	[8]-Gingerol	C19H30O4	340.2485	322.2144	0.5773	7.6321	Benzenoids	Phenols	1.027471490683749	0.04959915913976009	7.726278343646232	2.9497736524293683	up
MEDL02603	3',4',7-Trihydroxyflavone	C15H10O5	271.0604	270.0528	0.6432	7.0426	Flavonoids	Flavonoid	1.5931861767017998	0.0001043201448128235	7.61330226195509	2.9285223569578407	up
MEDP0215	Quinine	C20H24N2O2	363.1493	324.1838	0.8535	6.7766	Others	Others	1.0465718318563308	0.04914117701207005	7.5044677936050626	2.9077497615525427	up
MW0106120	Carisoprodol	C12H24N2O4	261.1852	260.1736	0.5482	6.747000000000001	Organic acids and derivatives	Carboxylic acids and derivatives	1.0373498408465671	0.0495339701140257	7.469744113325403	2.9010588222970344	up
MEDN0788	LXA5	C20H30O5	699.4098	350.2093	0.6328	7.3858	Oxidized lipids	Oxidized lipids	1.1592243822427242	0.01669093421770748	7.302682106941089	2.8684264299808504	up
MW0153990	Musk ambrette	C12H16N2O5	535.1855	268.1059	0.7781	3.9777	Benzenoids	Benzene and substituted derivatives	1.231348817704758	0.01570568006644784	7.243203914889947	2.856627991462968	up
MW0115313	Spiperone	C23H26FN3O2	437.2292	395.2009	0.5491	8.3942	Organic oxygen compounds	Organooxygen compounds	1.18058533062156	0.027701413860451586	7.1898537969052425	2.8459624342773253	up
MW0006547	Chloropropylate	C17H16Cl2O3	339.0528	338.0476	0.5488	2.9014	Benzenoids	Benzene and substituted derivatives	1.3410692201119918	0.008701519510231537	7.1670726014329516	2.8413839688863747	up
MW0152383	Leu Ile Ser Glu	C20H36N4O8	459.2443	460.2533	0.7333	2.701	--	--	1.272848218219633	0.008661608297338162	7.136287236803103	2.8351736851533333	up
MW0158189	Trp Leu Met	C22H32N4O4S1	449.2237	448.2144	0.581	2.194	--	--	1.5357059359799288	0.00040810343758261917	7.111394858497361	2.8301325637923846	up
MW0143048	3-Methylcholanthrene	C21H16	269.1355	268.1252	0.6004	5.3517	Benzenoids	Phenanthrenes and derivatives	1.240212993642254	0.015181729316701375	6.904984058337255	2.7876380837107937	up
MW0053527	Gibberellin A14	C20H28O5	350.2045	348.1937	0.9787	7.5738	Lipids and lipid-like molecules	Prenol lipids	1.1785006260896478	0.02818989243384145	6.891141960164069	2.7847430778135944	up
MW0102919	Triamcinolone acetonide	C24H31FO6	435.2141	434.2105	0.59	8.138	Lipids and lipid-like molecules	Steroids and steroid derivatives	1.132600237422643	0.03468335841323668	6.7293912210068525	2.7504759963422147	up
MW0143788	6beta-Hydroxy-17beta-estradiol;6beta-Hydroxyestradiol-17beta	C18H24O3	289.1802	288.1725	0.7908	6.7914	Lipids and lipid-like molecules	Steroids and steroid derivatives	1.1161842689581198	0.03436359762041876	6.728849690070722	2.7503598943937333	up
MW0015923	Artemisinin	C15H22O5	283.1519	282.1467	0.708	4.6123	Lipids and lipid-like molecules	Prenol lipids	1.1295245228910058	0.03508657068748257	6.718638651839267	2.748168939967812	up
MW0122852	Amprolio	C14H18N4	243.1592	242.1531	0.5208	4.6122	Organoheterocyclic compounds	Pyridines and derivatives	1.0919034956282567	0.044044161545194964	6.659888316277339	2.7354979840677345	up
MW0120643	4-Nitrophenyl 4-[bis(2H-1,3-benzodioxol-5-yl)(hydroxy)methyl]piperidine-1-carboxylate	C27H24N2O9	503.1407	520.1482	0.5643	2.9125	Organoheterocyclic compounds	Benzodioxoles	1.4870118926306417	0.001950517706404612	6.574987713548294	2.716988198493228	up
MW0140123	(+)-Menthofuran;(R)-Menthofuran	C10H14O	339.1784	150.1045	0.6606	6.4349	Lipids and lipid-like molecules	Prenol lipids	1.6126378131038377	1.097159462402611e-05	6.306486772244088	2.656836530122648	up
MEDN0151	Adenine	C5H5N5	136.0621	135.055	0.8436	1.1589	Nucleotide And Its metabolomics	Nucleotide and Its metabolomics	1.5168588116435728	0.0011850302711646716	6.295621120685722	2.6543487200456424	up
MEDL02630	Apigenin	C15H10O5	270.0482	270.0528	0.9873	7.0252	Flavonoids	Flavonoid	1.550242244415949	8.562606605022891e-05	6.286389618448711	2.652231690397	up
MW0053989	Hydroxyprogesterone	C21H30O3	331.2239	330.2195	0.674	9.7934	Lipids and lipid-like molecules	Steroids and steroid derivatives	1.0819487052007364	0.04595586522778655	6.2849460888046105	2.6519003695069103	up
MW0139096	Naringenin	C15H12O5	256.0694	272.0685	0.9607	6.8918	Phenylpropanoids and polyketides	Flavonoids	1.3375975221189935	0.008910545890719294	6.273698226528414	2.6493161352443724	up
MW0151990	Kalkitoxin thioamide alcohol	C21H40N2O2S	786.6044	384.281	0.618	9.1713	--	--	1.1644259622682342	0.03147540572599018	6.2270491262617895	2.6385486609294446	up
MW0136703	6-Hydroxyflavone	C15H10O3	237.0525	238.063	0.5870000000000001	2.7132	Phenylpropanoids and polyketides	Flavonoids	1.432483053788127	0.0019298162174228766	6.191662977059053	2.6303269452293736	up
MW0139096	Naringenin	C15H12O5	271.0601	272.0685	0.764	5.7943	Phenylpropanoids and polyketides	Flavonoids	1.4907703850406322	0.0006878850333293408	6.1715628864485295	2.62563588370304	up
MW0053661	Glucocerebrosides	C40H75NO9	696.5401	713.5442	0.5879	10.8885	Lipids and lipid-like molecules	Sphingolipids	1.3121640665664849	0.010210412872678723	6.151890395645636	2.6210297999403265	up
MW0137685	cis-3,4',5-Trimethoxy-3'-hydroxystilbene	C17H18O4	287.1241	286.1205	0.7939	5.0855	Phenylpropanoids and polyketides	Stilbenes	1.0503998194727413	0.047753130185880434	6.137842455256803	2.6177316155116794	up
MW0063595	Sorbitan laurate	C18H34O6	710.5039999999997	1366.9879	0.5856	6.2475	Lipids and lipid-like molecules	Fatty Acyls	1.2631114316923535	0.013367026222152942	6.131778052066747	2.6163054776591723	up
MW0147733	Compactin diol lactone;ML-236A	C18H26O4	307.1901	306.1831	0.6592	6.7458	Organoheterocyclic compounds	Lactones	1.0453026961943352	0.04539096131819372	6.079064681646784	2.603849369236044	up
MW0107766	Leu Val	C11H22N2O3	294.1801	230.163	0.6965	1.9148	Organic acids and derivatives	Carboxylic acids and derivatives	1.3317374721452415	0.007784224086876406	5.976342621240841	2.5792628596057052	up
MW0129527	1-(2-Hydroxy-4-methoxyphenyl)-3-phenyl-1-propanone	C16H16O3	535.1978	256.1099	0.5498	4.0158	Phenylpropanoids and polyketides	Linear 1,3-diarylpropanoids	1.4269105587975393	0.003990180839343493	5.9553525468917226	2.574186915746385	up
MW0151420	Ile Glu Leu Lys	C23H43N5O7	502.3365	501.3162	0.5081	8.792	--	--	1.0603036199675415	0.04260587661530955	5.946389597949198	2.5720139894170755	up
MW0154127	N-[(7,8-Dihydropterin-6-yl)methyl]-4-(beta-D-ribofuranosyl)aniline 5'-phosphate	C18H23N6O8P	501.1257	482.1315	0.5691	2.9105	--	--	1.4807031149212009	0.0009101944339074373	5.90835802690159	2.5627572512864027	up
MW0152383	Leu Ile Ser Glu	C20H36N4O8	461.2607	460.2533	0.5870000000000001	2.7125	--	--	1.2941110200400805	0.010444013816514532	5.906217119535293	2.5622343926248115	up
MW0055335	N-Octanoylsphingosine-1-phosphate	C26H52NO6P	488.3581	505.3532	0.6105	9.1168	Lipids and lipid-like molecules	Sphingolipids	1.1579699231094376	0.02546485069552252	5.806424297166082	2.5376499989455352	up
MW0063218	Pseudolaric acid B	C23H28O8	431.1669	432.1784	0.5184	1.8566	--	--	1.510834607635554	0.0003443205068519061	5.778241042218353	2.530630387903856	up
MW0108357	Myxochromide S1	C38H54N6O8	721.3916	722.4003	0.5481	7.4003	Organic acids and derivatives	Peptidomimetics	1.2338189717626804	0.0067735832421255285	5.707361669101712	2.5128239878762666	up
MW0061106	PG(16:1(9Z)/16:0)	C38H73O10P	759.4459	792.7207	0.6555	10.8939	Lipids and lipid-like molecules	Glycerophospholipids	1.261806525914858	0.0138279069748182	5.5416368471739945	2.4703121716732763	up
MW0066777	TG(14:0/18:0/22:5(4Z,7Z,10Z,13Z,16Z))	C57H100O6	996.6435	1198.8001	0.7617	10.0455	Lipids and lipid-like molecules	Glycerolipids	1.2123910842211203	0.02016181714150309	5.5110970394516805	2.4623395303827498	up
MEDP0167	Guanosine	C10H13N5O5	565.1752	283.0917	0.6587	1.4801	Nucleotide And Its metabolomics	Nucleotide and Its metabolomics	1.3522319534501248	0.004647933956192786	5.502847015803754	2.4601782209788867	up
MW0007107	Felbamate	C11H14N2O4	261.0872	238.0954	0.731	3.5419	Benzenoids	Benzene and substituted derivatives	1.3326472127175644	0.009652639305334271	5.47115784049641	2.4518461774380294	up
MW0134094	5,7-Dihydroxy-2-(4-hydroxyphenyl)-4-oxo-4H-chromen-3-yl 6-O-(6-deoxyhexopyranosyl)hexopyranoside	C27H30O15	617.1462	594.1585	0.7977	3.6666	Phenylpropanoids and polyketides	Flavonoids	1.4844441194082425	0.0011601561865494715	5.309427984095455	2.4085564393794434	up
MEDN0010	L-Citrulline	C6H13N3O3	351.2014	175.09599999999998	0.5411	1.8978	Amino acid and Its metabolomics	Amino acids	1.3862704660152103	0.006051142251400747	5.300407777144193	2.406103355040614	up
MW0134614	5-Methyl-7-methoxyisoflavone	C17H14O3	533.1927	266.0943	0.5943	4.0158	Phenylpropanoids and polyketides	Isoflavonoids	1.3830093719132557	0.0063755985441050255	5.268642054464004	2.397431167984057	up
MW0105660	Arg Ile	C12H25N5O3	270.1923	287.1957	0.5608	2.3112	--	--	1.3312972712840438	0.0075140880858194205	5.2301613183575135	2.3868554454406983	up
MW0054512	LysoPA(a-25:0/0:0)	C28H57O7P	578.4206	536.3842	0.8865	8.394	Lipids and lipid-like molecules	Glycerophospholipids	1.0711380556710122	0.03989904635879672	4.989343134823099	2.3188498920130973	up
MW0157410	Testolate	C19H28O4	368.2147	320.1988	0.9559	7.5738	Lipids and lipid-like molecules	Steroids and steroid derivatives	1.304638716610508	0.012338255671727284	4.969906106412731	2.3132185960345844	up
MW0139332	Phenethyl Caffeiate	C17H16O4	283.0949	284.1049	0.5921	2.9103	Phenylpropanoids and polyketides	Cinnamic acids and derivatives	1.4717269685082106	0.0011473575287847153	4.945960748979486	2.3062507905816028	up
MW0014465	4-Hydroxy-17β-estradiol	C18H24O3	356.1219	288.1725	0.653	3.8532	Lipids and lipid-like molecules	Steroids and steroid derivatives	1.6041153374874593	1.2481519778032785e-05	4.9388610723568185	2.30417838701139	up
MW0164683	(Z)-7-[(2R,3S)-3,5-dihydroxy-2-[(E,3S)-3-hydroxyoct-1-enyl]cyclopentyl]hept-5-enoic acid	C20H34O5	432.1719	354.2406	0.6432	4.2845	Lipids and lipid-like molecules	Fatty Acyls	1.5532753295520465	2.2651359794131666e-05	4.937785452190805	2.3038641524416565	up
MW0106732	Fumonisin B2	C34H59NO14	706.3986	705.3936	0.5316	11.467	Organic acids and derivatives	Carboxylic acids and derivatives	1.1747795597496502	0.024432203577660003	4.913246952235028	2.2966767544178492	up
MW0154499	Nigakihemiacetal A	C22H34O7	411.2148	410.2305	0.5931	7.2648	Lipids and lipid-like molecules	Prenol lipids	1.170006133950236	0.02629980865365596	4.895335041270882	2.2914076025948	up
MW0060910	PE-NMe2(22:6(4Z,7Z,10Z,13Z,16Z,19Z)/14:0)	C43H74NO8P	810.5359	763.5152	0.8273	8.6287	Lipids and lipid-like molecules	Glycerophospholipids	1.0902884275964282	0.03852432080056467	4.891758748912155	2.2903532549833523	up
MW0013025	2-(14,15-Epoxyeicosatrienoyl)glycerol	C23H38O5	377.2663	394.2719	0.7082	10.5756	Lipids and lipid-like molecules	Glycerolipids	1.1319217105213275	0.03414083127735814	4.887581387293519	2.2891207261677406	up
MW0164850	(2R,3R,4S,5S,6R)-4-[[(1S,3S,4S,5R,8R)-4,8-dihydroxy-2,6-dioxabicyclo[3.2.1]octan-3-yl]oxy]-6-(hydroxymethyl)oxane-2,3,5-triol	C12H20O10	342.1394	324.1056	0.9454	0.8663	Organic oxygen compounds	Organooxygen compounds	1.218727810071245	0.02026448959062372	4.885088783926901	2.28838478265775	up
MEDL02773	Indoleacetaldehyde	C10H9NO	158.0604	159.0684	0.8797	2.2924	Alkaloids	Plumerane	1.0753808690661686	0.027996750595619426	4.8339995978556844	2.27321735308454	up
MW0012432	15-Dehydro-prostaglandin D2	C20H30O5	349.201	350.2093	0.9011	7.7459	Lipids and lipid-like molecules	Fatty Acyls	1.1408628153921931	0.020195901684047758	4.833340377125137	2.273020596896643	up
MEDN0546	13,14-dihydro-15-keto PGD2	C20H32O5	317.2014	352.225	0.7439	7.4118	Oxidized lipids	Oxidized lipids	1.2664740223012485	0.005086372064009626	4.780752486421422	2.2572377150652523	up
MW0006719	Dehydrochorismic acid	C10H8O6	223.0203	1366.9879	0.6375	0.68	Benzenoids	Benzene and substituted derivatives	1.4262814002926159	0.0016776820759798214	4.771966055599589	2.254583780754785	up
MW0013471	2-Heptenoic acid	C7H12O2	274.1884	1437.0661	0.583	7.4118	Lipids and lipid-like molecules	Fatty Acyls	1.1794566043785106	0.012323460217593443	4.758552480896163	2.2505227823088205	up
MW0050173	DG(18:2(9Z,12Z)/18:3(6Z,9Z,12Z)/0:0)	C39H66O5	680.5201	154.1358	0.825	7.574	Lipids and lipid-like molecules	Fatty Acyls	1.2248835767449795	0.015410431883063276	4.7573696006082695	2.2501641128032315	up
MW0016057	Beclomethasone	C22H29ClO5	409.1735	408.1704	0.6046	4.3299	Lipids and lipid-like molecules	Steroids and steroid derivatives	1.1429449185369622	0.02685430794225524	4.743595911523904	2.245981117541887	up
MW0012475	15-Keto-prostaglandin E2	C20H30O5	368.2436	350.2093	0.9869	7.4102	Lipids and lipid-like molecules	Fatty Acyls	1.214472061293938	0.010957343396679607	4.727110010978143	2.240958439997132	up
MEDP0068	N-Acetylneuraminic Acid	C11H19NO9	274.0935	309.106	0.9077	0.8504	Amino acid and Its metabolomics	Amino acid derivatives	1.1125146105849557	0.03745556697453667	4.6973779107843034	2.2318556651482586	up
MW0105913	Aspartame	C14H18N2O5	296.133	294.1216	0.9354	2.6315	Organic acids and derivatives	Carboxylic acids and derivatives	1.3592563128944208	0.005264688773254387	4.6958104469574575	2.2313741731937418	up
MW0156404	Rigin	C18H32N8O6	457.2554	456.2445	0.5062	4.2838	--	--	1.4444913325153401	0.002763982796895821	4.6703147074289575	2.22351976868216	up
MW0103507	Crotonoside	C10H13N5O5	567.1902	283.0917	0.7656	1.4891	Nucleosides, nucleotides, and analogues	Purine nucleosides	1.6076847516257886	0.00016257547293295848	4.636029417877073	2.21288972098	up
MW0137590	Cardamomin	C16H14O4	334.0999	270.0892	0.5357	1.5131	Phenylpropanoids and polyketides	Linear 1,3-diarylpropanoids	1.4175231002627209	0.002902396319321006	4.514585585709325	2.174593562261627	up
MW0139389	Polydatin	C20H22O8	389.1228	390.1315	0.7554	3.8429	Phenylpropanoids and polyketides	Stilbenes	1.5823371950910703	1.2803158505911785e-05	4.443016330376073	2.1515394440058686	up
MW0149913	Glu Arg Glu	C16H28N6O8	450.2098	432.1969	0.7551	6.3774	--	--	1.3491435756170955	0.0046529003627821365	4.402225374213021	2.138233006641627	up
MW0134121	5,7-Dihydroxy-2-phenyl-6-[3,4,5-trihydroxy-6-(hydroxymethyl)oxan-2-yl]-8-(3,4,5-trihydroxyoxan-2-yl)chromen-4-one	C26H28O13	571.138	548.153	0.7327	4.0158	Phenylpropanoids and polyketides	Flavonoids	1.4802160857914952	0.00212600045938241	4.3965262308933095	2.1363640762925216	up
MEDL02259	Caffeine	C8H10N4O2	242.0871	194.0804	0.5593	2.9102	Alkaloids	Alkaloids	1.5002470873591318	0.0016465587652345686	4.375987879113518	2.129608742068533	up
MW0005845	7,12-Dimethylbenz[a]anthracene	C20H16	257.1383	256.1252	0.5345	4.5074	Benzenoids	Phenanthrenes and derivatives	1.0854125592705977	0.04370212253615095	4.3468469358901745	2.1199692953583367	up
MW0143759	6alpha,9-Difluoro-11beta-hydroxypregn-4-ene-3,20-dione;6alpha,9-Difluoro-11beta-hydroxyprogesterone	C21H28F2O3	367.2114	366.2007	0.5343	6.7026	Lipids and lipid-like molecules	Steroids and steroid derivatives	1.1141098661175697	0.03763130790877932	4.333351453657723	2.1154832502001235	up
MW0145298	Arg Asp Leu Tyr Ser	C28H44N8O10	653.3286	652.318	0.6153	6.7497	--	--	1.188163310971337	0.020154972086069804	4.312662297691544	2.108578750498492	up
MW0146712	Bicyclo-prostaglandin E2	C20H30O4	335.222	334.2144	0.7849	7.6032	--	--	1.0440241344416108	0.04040717256865621	4.309879522316554	2.107647541011408	up
MW0056355	PA(22:6(4Z,7Z,10Z,13Z,16Z,19Z)/14:0)	C39H65O8P	761.4393	692.4417	0.8841	7.1317	Lipids and lipid-like molecules	Glycerophospholipids	1.2203387977944242	0.015810012441626	4.307175802389971	2.1067422100576056	up
MW0059445	PE-NMe(18:1(9Z)/18:2(9Z,12Z))	C42H78NO8P	738.5458	755.5465	0.8269	11.1318	Lipids and lipid-like molecules	Glycerophospholipids	1.236715619666862	0.01444174063654116	4.298175230499863	2.1037243005925608	up
MW0112268	2-Phenylethyl 6-O-pentopyranosylhexopyranoside	C19H28O10	434.2031	416.1682	0.6312	4.3595	Organic oxygen compounds	Organooxygen compounds	1.1348128983757375	0.0299746857165783	4.292761981684103	2.101906182717341	up
MW0157030	Ser-Trp-OH	C20H19N3O7	414.1249	413.1223	0.5720000000000001	3.8571	--	--	1.6039253513827674	6.680194632929916e-05	4.284209512483629	2.09902903453032	up
MEDL02037	Chrysin	C15H10O4	253.0496	254.0579	0.8599	6.8749	Flavonoids	Flavonoid	1.474055516884806	0.0011799565290056332	4.2839772534540606	2.09895081986031	up
MW0000084	3-Hydroxyquinidine	C20H24N2O3	387.1908	340.1787	0.6302	4.3296	Alkaloids and derivatives	Cinchona alkaloids	1.2024284449598432	0.018867633604825792	4.2675446404750605	2.093406244584039	up
MEDL02037	Chrysin	C15H10O4	255.0653	254.0579	0.7463	6.894	Flavonoids	Flavonoid	1.5199920132705291	0.0011340076054688162	4.266558474414281	2.093072820702804	up
MW0143330	4-hydroxy Nonenal Mercapturic Acid-d3	C14H22D3NO5S	667.2948	322.1642	0.7469	3.2573	--	--	1.5082581806901292	0.0005178035136820254	4.241645528537834	2.084624060852333	up
MEDP1024	Leu-Val	C11H22N2O3	231.1698	230.163	0.8032	2.2282	Amino acid and Its metabolomics	Small Peptide	1.181357891837402	0.022948794527021248	4.2330438187354655	2.0816954229216664	up
MW0063326	Reticulataxanthin	C33H44O2	490.3734	1437.0661	0.6293	9.3362	Lipids and lipid-like molecules	Prenol lipids	1.1688731170138316	0.025885563723808628	4.2160988344048205	2.075908687239456	up
MW0059990	PE-NMe(22:6(4Z,7Z,10Z,13Z,16Z,19Z)/15:0)	C43H74NO8P	811.5382	763.5152	0.851	8.6288	Lipids and lipid-like molecules	Glycerophospholipids	1.089902731774527	0.04047770309169838	4.215968423669816	2.075864061665459	up
MW0110250	Tyr-Glu	C14H18N2O6	310.1154	310.1165	0.7522	2.6506	Organic acids and derivatives	Carboxylic acids and derivatives	1.5727532253317973	7.018345421401723e-05	4.184788920221707	2.065154855409	up
MW0146609	benzyl 4-(1,3-dioxoisoindolin-2-yl)-2',2'-dimethyl-3',5-dioxo-2',3',4,5-tetrahydro-3H-spiro[furan-2,9'-imidazo[1,2-a]indole]-1'(9a'H)-carboxylate	C31H25N3O7	550.148	551.1693	0.5615	1.8713	--	--	1.4136941305949768	0.0012680466675079472	4.17083235438604	2.0603353246086766	up
MW0152843	Lys Ala Asn Lys	C19H37N7O6	460.2915	459.2805	0.7015	5.4565	--	--	1.37984072458857	0.0037690422435902897	4.164797210159431	2.0582462504479926	up
MW0062272	Prostaglandin H2	C20H32O5	352.2198	352.225	0.9647	7.5956	Lipids and lipid-like molecules	Fatty Acyls	1.1196785522553925	0.02186885746973511	4.1367914731008035	2.0485122362035533	up
MEDP1493	N6-methyladenosine	C11H15N5O4	585.2188	281.1124	0.7672	2.129	Nucleotide And Its metabolomics	Nucleotide and Its metabolomics	1.5755600800389948	3.1395907121364644e-05	4.104279881796407	2.0371291155238755	up
MW0055039	MG(22:0/0:0/0:0)	C25H50O4	484.3731	722.6424	0.7473	10.1187	Lipids and lipid-like molecules	Glycerolipids	1.2937148420937752	0.010443549709470838	4.099073789190284	2.0352979607803796	up
MW0063433	Santonin	C15H18O3	267.0898	246.1256	0.5142	4.0081	Lipids and lipid-like molecules	Prenol lipids	1.3762546749109206	0.004072966851229712	4.080138482570583	2.028618119041703	up
MW0143248	4-Amino-4-deoxychorismate;ADC	C10H11NO5	268.1035	225.0637	0.8406	2.9127	Organic acids and derivatives	Carboxylic acids and derivatives	1.6304820913722162	5.114556414522444e-06	4.042921413943914	2.015398160865288	up
MW0006105	Averantin	C20H20O7	355.1178	372.1209	0.6992	3.8532	Benzenoids	Anthracenes	1.6165036776504758	2.177432950867494e-05	4.029748724755152	2.010689882214363	up
MW0012475	15-Keto-prostaglandin E2	C20H30O5	350.2045	350.2093	0.9794	7.4004	Lipids and lipid-like molecules	Fatty Acyls	1.2379847377200792	0.006199242504034001	4.024227490163334	2.0087118632084877	up
MW0154445	Neurosporaxanthin;all-trans-Neurosporaxanthin	C35H46O2	497.3464	498.3498	0.6177	9.9204	Lipids and lipid-like molecules	Prenol lipids	1.1990710123671953	0.016591718519132048	4.023583213175002	2.0084808698980643	up
MW0110206	Tyr Ile Leu	C21H33N3O5	452.2137	407.242	0.5351	4.3595	--	--	1.1572311087673162	0.025726521190664656	4.019960599932117	2.0071813614636307	up
MW0055368	Norethindrone	C20H26O2	299.1909	298.1933	0.7051	7.4118	Lipids and lipid-like molecules	Steroids and steroid derivatives	1.2211961680380459	0.007713314338625742	4.010795603744248	2.0038884460880424	up
MW0156184	Psicofuranine;Angustmycin C	C11H15N5O5	593.2057	297.1073	0.6047	1.7797	Nucleosides, nucleotides, and analogues	Purine nucleosides	1.5698059767762231	3.87563086675612e-05	3.9981150743013902	1.999319996528454	up
MW0138049	ent-Epiafzelechin(2a->7,4a->8)epiafzelechin 3-(4-hydroxybenzoic acid)	C37H28O12	663.1509	1423.0505	0.5367	1.4798	Phenylpropanoids and polyketides	Flavonoids	1.459372545474172	0.001219174032011142	3.9955569278593823	1.998396609801867	up
MEDN1037	p-Cresol	C7H8O	240.1075	108.0575	0.8989	3.5476	Benzene and substituted derivatives	Phenolics	1.3358984382447796	0.00892627248785764	3.990065033573463	1.996412260946196	up
MW0160087	(8R,9S,10R,13S,14S,17R)-17-hydroxy-17-[(1R)-1-hydroxyethyl]-10,13-dimethyl-2,6,7,8,9,11,12,14,15,16-decahydro-1H-cyclopenta[a]phenanthren-3-one	C21H32O3	409.1515	332.2351	0.8798	7.6177	Lipids and lipid-like molecules	Steroids and steroid derivatives	1.0152582393592589	0.04036444521993342	3.9679642334253984	1.9883990215684464	up
MW0153203	Lys Val Ile Arg	C23H46N8O5	513.3318	514.3591	0.6689	9.5304	--	--	1.0817320109168609	0.03885397831093086	3.9634673741657966	1.986763100698286	up
MW0153174	Lys Tyr Gln	C20H31N5O6	438.2347	437.2274	0.6126	4.6567	--	--	1.407917563631046	0.001912964794599747	3.96062273010907	1.9857272835896915	up
MW0127008	Ziprasidone	C21H21ClN4OS	413.1204	412.1125	0.7798	3.8564	Organoheterocyclic compounds	Diazinanes	1.6095432680798758	5.6215614209924305e-05	3.9369810147005286	1.9770897554069264	up
MW0006905	Dipivefrin	C19H29NO5	334.1862	351.2046	0.5903	4.5751	Benzenoids	Phenol esters	1.3678141825427237	0.004745686354328672	3.90065737768246	1.963717281821412	up
MEDL02170	LipoxinA4	C20H32O5	351.2068	352.225	0.5516	7.4004	Lipids	Free fatty acids	1.0436194187740555	0.03589074095665107	3.8854174313544334	1.9580696034704608	up
MW0014136	3-Hydroxyvalproic acid	C8H16O3	125.0961	160.1099	0.6992	2.907	Lipids and lipid-like molecules	Fatty Acyls	1.5491375400952023	0.0006628625901669812	3.791472701736697	1.9227583356796565	up
MW0113933	Amylotetraose	C24H42O21	689.204	666.2219	0.7095	4.2416	Organic oxygen compounds	Organooxygen compounds	1.4401504264397822	0.002651522786827318	3.7569566673364143	1.9095644760596973	up
MW0158564	Tyr Phe Asp Arg	C28H37N7O8	600.2695	599.2704	0.5823	4.9388	--	--	1.2396221822955946	0.020425273823520062	3.7525876093975294	1.9078857539693281	up
MW0056357	PA(22:6(4Z,7Z,10Z,13Z,16Z,19Z)/15:0)	C40H67O8P	774.3997	706.4574	0.6453	7.1326	Lipids and lipid-like molecules	Glycerophospholipids	1.154259358262089	0.025579476783285062	3.7449240260757453	1.9049364507759992	up
MW0060160	PE-NMe2(14:0/16:1(9Z))	C37H72NO8P	655.4956	689.4996	0.8290000000000001	10.2226	Lipids and lipid-like molecules	Glycerophospholipids	1.1620003946476556	0.02757248906953716	3.699978449824009	1.887516867924675	up
MW0000172	Cephaeline	C28H38N2O4	467.2972	466.2832	0.6447	8.512	Alkaloids and derivatives	Emetine alkaloids	1.0607669804539026	0.04421521269752292	3.694391919544063	1.8853369227335288	up
MW0115164	Populin	C20H22O8	408.1655	390.1315	0.6666	3.8532	Organic oxygen compounds	Organooxygen compounds	1.6187396295140597	2.4926937691776143e-05	3.6824736305685137	1.880675194457528	up
MEDP1061	DL-O-tyrosine	C9H11NO2	146.0597	165.079	0.6753	2.2989	Amino acid and Its metabolomics	Amino acids	1.0221231794508794	0.046606166154020544	3.668843806104129	1.8753254859558663	up
MEDP1095	Glycine dehydrocholic acid	C26H37NO6	287.201	459.2621	0.6588	7.4115	Bile acids	Bile acids	1.2380756573486498	0.00729731023854647	3.6647003662924393	1.8736952453616604	up
MW0012083	11b-Hydroxyprogesterone	C20H28O4	315.1961	136.1252	0.9936	7.4115	Lipids and lipid-like molecules	Steroids and steroid derivatives	1.2290772347075805	0.00794972994036823	3.657622705989747	1.8709062647337973	up
MW0115727	(-)-Blebbistatin	C18H16N2O2	293.1361	292.1212	0.5119	6.4026	Organoheterocyclic compounds	Quinolines and derivatives	1.2643318715070595	0.01140484163677356	3.635360794170402	1.8620985526263176	up
MW0111098	Miltefosine	C21H46NO4P	471.3313	407.3164	0.5526	9.1167	Organic nitrogen compounds	Organonitrogen compounds	1.1744717314315347	0.024618173986823488	3.63442317903852	1.8617264115245973	up
MW0153203	Lys Val Ile Arg	C23H46N8O5	532.3753	514.3591	0.5114	8.5408	--	--	1.187001165590989	0.014999682925541668	3.616538286497704	1.8546094248395282	up
MW0016043	Baliospermin	C32H50O8	561.3389	562.3506	0.6013	10.222	Lipids and lipid-like molecules	Prenol lipids	1.0976033898007658	0.0355480949819607	3.614005289996585	1.853598617947464	up
MW0126838	trans-3'-Hydroxycotinine	C10H12N2O2	234.1244	192.0899	0.6369	2.0566	Organoheterocyclic compounds	Pyridines and derivatives	1.1247053673033551	0.02953346362021665	3.606222437919347	1.850488387393051	up
MW0055207	N-(Dodecanoyl)sphing-4-enine-1-phosphate	C30H60NO6P	544.4201	561.4158	0.5605	9.9122	Lipids and lipid-like molecules	Sphingolipids	1.1733650073210076	0.026158484207202726	3.5945344839650653	1.8458049441941002	up
MW0054684	Manoalide	C25H36O5	439.2452	416.2563	0.6203	9.0443	Lipids and lipid-like molecules	Prenol lipids	1.0961074108128024	0.044372395963993366	3.588736020881064	1.8434758057473728	up
MW0057021	PC(18:1(9Z)/18:2(9Z,12Z))	C44H82NO8P	851.5467	142.0994	0.7490000000000001	8.1749	Lipids and lipid-like molecules	Glycerophospholipids	1.1055519123551545	0.031099626680572662	3.578592695062108	1.8393923497746465	up
MW0052410	Dimethyl suberate	C10H18O4	241.0838	202.1205	0.6005	2.9125	Lipids and lipid-like molecules	Fatty Acyls	1.4945301457275837	0.0017600139645899758	3.570709221272168	1.8362106536357523	up
MW0144062	8-hydroxy-2'-deoxy Guanosine	C10H13N5O5	589.1721	283.0917	0.5124	1.4895	--	--	1.6250383397830193	7.350919461639668e-05	3.5668652837150168	1.8346567279475632	up
MW0059240	PE-NMe(14:0/18:1(11Z))	C38H74NO8P	669.5110000000002	703.5152	0.8406	10.2228	Lipids and lipid-like molecules	Glycerophospholipids	1.1580535568126755	0.02601614886769125	3.5667057318266364	1.8345921923264368	up
MW0059236	PE-NMe(14:0/15:0)	C35H70NO8P	750.4528	663.4839	0.9013	11.4526	Lipids and lipid-like molecules	Glycerophospholipids	1.1423393562404005	0.028175926364877594	3.5481526839563537	1.8270680929668028	up
MW0012921	1-Octadecyl-2-acetyl-sn-glycero-3-phosphocholine	C28H58NO7P	534.3992	551.3951	0.5383	8.9244	Lipids and lipid-like molecules	Glycerophospholipids	1.1456737110147848	0.030792508167174843	3.5270917199538414	1.8184790926913093	up
MW0144108	9,10-Dihydroxy-12,13-epoxyoctadecanoate;9,10-Dihydroxy-12,13-epoxyoctadecanoic acid	C18H34O5	659.4728	330.2406	0.6597	7.5655	Lipids and lipid-like molecules	Fatty Acyls	1.1501411262590568	0.021150747265697573	3.5269622207330604	1.8184261223326441	up
MW0014412	4alpha-hydroxymethyl-4beta-methyl-5alpha-cholesta-8-en-3beta-ol	C29H50O2	516.3611	1493.1287	0.7399	9.749	Lipids and lipid-like molecules	Prenol lipids	1.084226583096072	0.044025176840253824	3.525504545980556	1.8178297408859312	up
MW0144617	Ala Ile Ile	C15H29N3O4	316.2137	315.2158	0.8408	3.2969	--	--	1.191154659473645	0.017918055303209782	3.525049591482232	1.81764355393192	up
MW0110244	Tyr-Cys	C12H16N2O4S	285.077	284.0831	0.5931	7.3141	Organic acids and derivatives	Carboxylic acids and derivatives	1.3636952653114451	0.006630308513854407	3.5173099603302247	1.8144724769953733	up
MW0144439	Ajugalactone	C29H40O8	499.2661	516.2723	0.5394	4.3282	Lipids and lipid-like molecules	Steroids and steroid derivatives	1.2446693760516394	0.01569866741614117	3.5084074011819983	1.8108162852792524	up
MW0015772	Androst-5-ene-3,17-dione	C19H26O2	333.2066	286.1933	0.9988	7.4115	Lipids and lipid-like molecules	Steroids and steroid derivatives	1.2314205723491916	0.007589432668894814	3.4954949265151964	1.805496741001896	up
MW0152374	Leu Ile Glu	C17H31N3O6	415.2548	373.2213	0.5749	2.2415	--	--	1.3589756862825166	0.005712401107676606	3.4952376507740204	1.8053905517200148	up
MW0155201	Phe Gly Val	C16H23N3O4	322.1767	321.1689	0.6597	2.2818	--	--	1.4679403041904646	0.0006069830082113419	3.483219867115853	1.8004215413100302	up
MW0000320	Levorphanol	C17H23NO	532.3734	257.178	0.5437	9.5291	Alkaloids and derivatives	Morphinans	1.079649447357388	0.03922634261231829	3.462006720523675	1.7916085252986496	up
MW0056817	PC(14:1(9Z)/16:0)	C38H74NO8P	668.5082	433.3192	0.7856	10.2226	Lipids and lipid-like molecules	Glycerophospholipids	1.1873526294472847	0.024048627408739	3.45507497471846	1.7887170172650286	up
MW0156738	Ser Glu Lys Ile Asp	C24H42N6O11	591.2983	590.2912	0.5775	10.6224	--	--	1.1528317410129858	0.0283690530334849	3.438992579184189	1.7819860027545784	up
MW0144836	Alangimarckine	C29H37N3O3	493.3137	475.2835	0.5679	9.1163	Alkaloids and derivatives	Harmala alkaloids	1.1705013394277113	0.023774146592285984	3.412999574217696	1.7710402344560994	up
MW0006044	Anastrozole	C17H19N5	294.1704	293.164	0.6048	2.5596	Benzenoids	Benzene and substituted derivatives	1.0697910566791544	0.04095421890140491	3.4075037550657963	1.7687152468798808	up
MW0153028	Lys Leu Asn His Gln	C27H46N10O8	639.3492	638.35	0.5379999999999999	8.1896	--	--	1.4728094049575398	0.0015919567646294106	3.4070157347950403	1.7685086103219478	up
MW0153955	Montanin	C32H48O8	559.3232	560.3349	0.7136	10.0266	Lipids and lipid-like molecules	Prenol lipids	1.096039233992114	0.0329986407455382	3.3962725466524835	1.7639522380212669	up
MW0062224	Prostaglandin D1	C20H34O5	731.47	354.2406	0.5841	10.9478	Lipids and lipid-like molecules	Fatty Acyls	1.1864508163023495	0.01951655706116149	3.3758655849070767	1.755257462146835	up
MW0006387	Bisphenol A	C15H16O2	251.0942	228.115	0.588	4.0158	Benzenoids	Benzene and substituted derivatives	1.4459400077875035	0.003326932354121009	3.375721503682221	1.7551958869154447	up
MW0143259	4'-Apo-beta,psi-caroten-4'-al;beta-Apo-4'-carotenal	C35H46O	483.3674	482.3549	0.5268	10.1052	Lipids and lipid-like molecules	Prenol lipids	1.190037689033263	0.02361260356020044	3.3718832925720563	1.7535546026674929	up
MW0141690	1alpha-Hydroxytestosterone	C19H28O3	269.1903	304.2038	0.9808	7.4116	Lipids and lipid-like molecules	Steroids and steroid derivatives	1.2234151326304998	0.00814620933391046	3.3678600222516164	1.7518321771810088	up
MW0054212	Khivorin	C32H42O10	587.2818	586.2778	0.5988	4.4624	Lipids and lipid-like molecules	Prenol lipids	1.287874770401157	0.009646242090529356	3.351800098145877	1.7449361090571127	up
MW0154445	Neurosporaxanthin;all-trans-Neurosporaxanthin	C35H46O2	517.3916	498.3498	0.852	9.9121	Lipids and lipid-like molecules	Prenol lipids	1.1506097560126654	0.029346163746774782	3.3507770574017726	1.744495700603661	up
MW0158167	Trp His Thr Ile Ile	C33H48N8O7	669.3765	668.3646	0.654	11.4526	--	--	1.0822166825738369	0.036753478863031895	3.345144434559372	1.7420685039979562	up
MW0120219	4-Amino-6,7-dimethoxy-2-(1-piperazinyl)quinazoline	C14H19N5O2	290.16	289.1539	0.645	3.34	Organoheterocyclic compounds	Diazinanes	1.4131353124495103	0.0027118853186707684	3.332331881460293	1.7365320921479566	up
MW0012743	19-Noretiocholanolone	C18H28O2	570.4378	276.2089	0.5101	10.4298	Lipids and lipid-like molecules	Steroids and steroid derivatives	1.1723017068888653	0.02254843335302689	3.328028154938382	1.7346676386527318	up
MW0158888	Val Arg Ala Glu	C19H35N7O7	474.2714	473.2598	0.6288	5.3815	--	--	1.4458181808661386	0.00014632579399881146	3.3223699902548063	1.7322127456009349	up
MEDL00365	Tyr-Leu	C15H22N2O4	341.1671	294.158	0.5317	6.6135	Amino acid and Its metabolomics	Small Peptide	1.1147411231468325	0.029255699376651286	3.3131201388209237	1.7281905187037556	up
MW0123290	Cetylpyridinium	C21H37N	304.3008	303.2926	0.5683	6.9296	Organoheterocyclic compounds	Pyridines and derivatives	1.216962088991196	0.01729780571218412	3.3127954051412964	1.7280491067987969	up
MW0055740	PA(18:1(9Z)/22:6(4Z,7Z,10Z,13Z,16Z,19Z))	C43H71O8P	815.4907	746.4887	0.5576	8.6287	Lipids and lipid-like molecules	Glycerophospholipids	1.1135554360977349	0.03741500217933935	3.3085654425447237	1.726205815961226	up
MW0014406	4alpha-formyl-4beta-methyl-5alpha-cholesta-8-en-3beta-ol	C29H48O2	514.3453	428.3654	0.7438	9.5419	Lipids and lipid-like molecules	Prenol lipids	1.0896823084940146	0.04207208021577934	3.287792540282766	1.7171192678310347	up
MW0107825	Leukotriene D4 methyl ester	C26H42N2O6S	533.2601	510.2764	0.6055	4.702	Organic acids and derivatives	Carboxylic acids and derivatives	1.0917714529362323	0.037197502082962665	3.284955757578284	1.7158739401816292	up
MW0168577	3-Phenoxybenzylalcohol; LC-ESI-ITFT; MS2; CE	C13H12O2	223.0731	200.0837	0.5832	2.9125	--	--	1.5124404163745433	0.0013583483033817812	3.2737541354958	1.7109459770288729	up
MW0012704	18-Hydroxy-5Z,8Z,11Z,14Z-eicosatetraenoic acid	C20H32O3	321.2457	320.2351	0.6732	6.6075	Lipids and lipid-like molecules	Fatty Acyls	1.0695054099511991	0.04006083127341553	3.2609749157950167	1.705303343571101	up
MW0007824	Mitoxantrone	C22H28N4O6	445.2228	444.2009	0.5831	3.6337	Benzenoids	Anthracenes	1.295658734569697	0.004543859867294728	3.2418344092349054	1.6968104008255762	up
MW0103647	Pseudouridine	C9H12N2O6	267.059	244.0695	0.9728	1.2299	Nucleosides, nucleotides, and analogues	Nucleoside and nucleotide analogues	1.4238801840257367	0.0011174096940968932	3.2394370487029387	1.6957431224895665	up
MW0062128	Polyporusterone A	C28H46O6	479.3356	478.3294	0.7641	9.7044	--	--	1.1640986554220112	0.02019997292257393	3.223375733143812	1.6885723661042282	up
MW0062234	Prostaglandin E1	C20H34O5	377.2204	354.2406	0.7103	7.603	Lipids and lipid-like molecules	Fatty Acyls	1.0771951935304376	0.030010782257900208	3.2194710883089206	1.686823694256049	up
MW0143854	6k-PGF1d4	C20H30D4O6	747.5254	374.2606	0.7277	7.1603	--	--	1.1328358216371697	0.023749432683750654	3.1986517293603645	1.677463919719265	up
MW0114162	D-(+)-Raffinose	C18H32O16	522.2023	504.169	0.7268	2.0025	Organic oxygen compounds	Organooxygen compounds	1.5790801154986798	0.00011387678169675852	3.1929587817714973	1.6748939291317224	up
MW0143132	3-Vinylbacteriochlorophyllide a;3-Deacetyl-3-vinylbacteriochlorophyllide a	C35H36MgN4O5	617.2551	616.2536	0.5876	3.8528	Organoheterocyclic compounds	Tetrapyrroles and derivatives	1.594814135041804	0.00011401758083275745	3.1895922530830316	1.6733720064184527	up
MW0054179	Jasmonic acid	C12H18O3	249.0892	210.1256	0.6805	4.0158	Lipids and lipid-like molecules	Fatty Acyls	1.4368267610317949	0.00360936983063999	3.1832038192540817	1.6704795351117478	up
MEDP0109	(3,4-Dimethoxyphenyl) Acetic Acid	C10H12O4	196.0688	196.074	0.9759	3.8429	Benzene and substituted derivatives	Phenolic acids	1.3928242911353137	0.0032437949041051913	3.1755906478709344	1.6670249526732763	up
MW0124112	Fentanyl	C22H28N2O	400.2328	336.2202	0.5695	6.2207	Organoheterocyclic compounds	Piperidines	1.1269793191748172	0.03569423102071941	3.1690940256526945	1.6640704644946798	up
MW0137547	Caffeic acid phenethyl ester	C17H16O4	267.0997	284.1049	0.5765	4.0158	Phenylpropanoids and polyketides	Cinnamic acids and derivatives	1.4308152587096206	0.0038519413233370587	3.1586343530883454	1.6593009388201614	up
MW0001218	1-(Benzoyloxy)propan-2-yl benzoate	C17H16O4	307.0919	284.1049	0.7425	2.919	Benzenoids	Benzene and substituted derivatives	1.6036964708146644	0.00014239581060782316	3.1532478283907106	1.6568385625805582	up
MW0144717	Ala Pro Met	C13H23N3O4S1	318.1573	317.1409	0.5075	4.0786	--	--	1.4051305872755302	0.0024649527540653764	3.1498020626646133	1.6552611707761895	up
MW0108782	N-Formyl-methionyl-leucyl-phenylalanine	C21H31N3O5S	436.1823	437.1984	0.5816	1.9927	Organic acids and derivatives	Carboxylic acids and derivatives	1.2446009321674212	0.009206619671727754	3.1494597380270304	1.6551043682576954	up
MW0158229	Trp Pro Ile	C22H30N4O4	415.2571	414.2267	0.5749	5.6946	--	--	1.2932180166504919	0.0039167898267002295	3.1482598969983875	1.6545546439691785	up
MW0157706	Thr Leu Lys Lys	C22H44N6O6	489.3412	488.3322	0.6732	8.116	--	--	1.045057122187494	0.04818371483041131	3.146338809640457	1.6536740339669778	up
MW0059354	PE-NMe(16:1(9Z)/16:1(9Z))	C38H72NO8P	666.4924	701.4996	0.831	10.0306	Lipids and lipid-like molecules	Glycerophospholipids	1.1733660223541968	0.024653090038331583	3.1172200072039846	1.6402599811105498	up
MW0126138	Pifithrin-beta	C16H16N2S	267.0993	268.1034	0.5505	5.1338	Organoheterocyclic compounds	Azoles	1.350013524707447	0.005400659393181071	3.1097396648099145	1.6367938086489688	up
MW0054402	L-Octanoylcarnitine	C15H29NO4	598.4138	287.2097	0.9448	10.0308	Lipids and lipid-like molecules	Fatty Acyls	1.0483065163633738	0.04858378168096738	3.101725503054612	1.6330710161919773	up
MW0050453	DG(20:0/8:0/0:0)	C31H60O5	590.374	512.4441	0.7715	9.854	Lipids and lipid-like molecules	Glycerolipids	1.1268989478055855	0.024161863092641032	3.0963843033147	1.6305845406291557	up
MW0106127	Ceanothine D	C27H40N4O4	485.3102	1395.0192	0.5094	8.7927	Organic acids and derivatives	Carboxylic acids and derivatives	1.0778541429700383	0.04177195628709703	3.093653233279841	1.6293114945682945	up
MW0123748	Docosahexaenoylserotonin	C32H42N2O2	487.3263	486.3246	0.5476	8.9989	Organoheterocyclic compounds	Indoles and derivatives	1.0744340937157706	0.0440495105041149	3.0866120866615314	1.6260241820735577	up
MW0144608	Ala Ile Asn	C13H24N4O5	358.2091	316.1747	0.5813	2.2186	--	--	1.6428836549535586	3.7576220343503646e-08	3.0844377537030563	1.6250075318803519	up
MW0010770	(+)-Cloprostenol methylamide	C23H32ClNO5	438.1985	437.1969	0.5837	2.0127	Lipids and lipid-like molecules	Fatty Acyls	1.2766215350130912	0.010043078917599335	3.07329671125129	1.6197870585633019	up
MW0145976	Asn-Gly-OH	C11H11N3O7	315.0865	297.0597	0.5037	7.1031	--	--	1.520835373331794	4.345445032365216e-05	3.062612099627484	1.6147626515002955	up
MEDL01846	Dihydroferulic Acid	C10H12O4	195.0655	196.0736	0.8381	3.8428	Phenolic acids	Phenolic acids	1.5966041261132546	2.8637925752613718e-06	3.051083318570759	1.6093215773756269	up
MW0007446	Itopride	C20H26N2O4	359.199	358.1893	0.5712	1.7107	Benzenoids	Benzene and substituted derivatives	1.4384960012477044	0.0027452541341541447	3.0501893785858747	1.608898818762371	up
MW0141056	1,1-Diphenyl-2-(4-methoxyphenyl)propene	C22H20O	301.1639	300.1514	0.5074	4.2417	Phenylpropanoids and polyketides	Stilbenes	1.2142438883891378	0.017628328294137956	3.044269387059668	1.6060960284140766	up
MW0010589	Ferulic acid dilactone	C20H18O8	462.9937	386.1002	0.5074	0.5502	Lignans, neolignans and related compounds	Lignan lactones	1.3552201967272206	0.0022960212422175105	3.0421580367252035	1.6050951014113528	up
MW0143854	6k-PGF1d4	C20H30D4O6	766.5663	374.2606	0.5082	7.1622	--	--	1.161277500141014	0.024623998952290345	3.03702867654804	1.602660530934851	up
MW0138520	Isorhamnetin 3-neohesperidoside	C28H32O16	647.1328	624.169	0.5653	1.8917	--	--	1.2940258876246855	0.006959319534585286	3.0346487531905355	1.6015295407460133	up
MW0161510	(3S,4S,6aR,6bS,8aR,9R,14bR)-4-(hydroxymethyl)-4,6a,6b,8a,11,11,14b-heptamethyl-1,2,3,4a,5,6,7,8,9,10,12,12a,14,14a-tetradecahydropicene-3,9-diol	C30H50O3	498.3504	458.376	0.7346	9.7045	Lipids and lipid-like molecules	Prenol lipids	1.0884443352277728	0.04067441195210605	3.032931823437885	1.6007130683235928	up
MW0155391	Phe Tyr Phe Lys Ile	C39H52N6O7	717.3868	716.3897	0.5439	7.3826	--	--	1.2842799179040496	0.004947813221654919	3.0235928322480987	1.5962638741996402	up
MW0141511	17,20-dimethyl Prostaglandin F1	C22H40O5	383.2693	384.2876	0.7031	8.7357	--	--	1.2477574587321922	0.011995995898570562	3.020955870441767	1.5950051096005031	up
MW0123814	Emedastine	C17H26N4O	301.201	302.2107	0.529	6.6048	Organoheterocyclic compounds	Benzimidazoles	1.07684947880827	0.032241895955527976	3.0168960807377165	1.5930650026210298	up
MW0006428	Bumetanide	C17H20N2O5S	365.116	364.1093	0.5927	5.7686	Benzenoids	Benzene and substituted derivatives	1.345303919617198	0.00468092353188502	2.9890100573732874	1.5796677513813988	up
MW0103535	Didanosine	C10H12N4O3	283.0909	236.0909	0.8023	1.4895	Nucleosides, nucleotides, and analogues	Purine nucleosides	1.5623149865962078	1.64981380285301e-05	2.9746261295617047	1.5727083524803094	up
MW0161579	(5S,9R,10S,13R,14R,17R)-10,13-dimethyl-17-[(2R)-6-methylheptan-2-yl]-1,2,4,5,6,9,11,12,14,15,16,17-dodecahydrocyclopenta[a]phenanthren-3-one	C27H44O	432.3548	384.3392	0.8619	11.4688	Lipids and lipid-like molecules	Steroids and steroid derivatives	1.0850014262075935	0.035686369240204886	2.9702501797449044	1.5705844521965633	up
MW0145363	Arg Gly Leu	C14H28N6O4	362.2434	344.2172	0.5646	7.1031	--	--	1.2019782936773584	0.019377201723312303	2.969500243891624	1.5702201511182023	up
MW0006088	Asulam	C8H10N2O4S	272.0604	230.0361	0.5358	4.5816	Benzenoids	Benzene and substituted derivatives	1.084387193086458	0.03624689837390772	2.9613023374379535	1.5662317915811457	up
MW0111730	1-[5-Ethyl-2-hydroxy-4-[[6-methyl-6-(1H-tetrazol-5-YL)heptyl]oxy]phenyl]ethanone	C19H28N4O3	359.206	360.2161	0.5973	6.0945	Organic oxygen compounds	Organooxygen compounds	1.0832513970055289	0.03067865540429318	2.961177111037174	1.5661707821647382	up
MEDN0848	Indole-3-Ethanol	C10H11NO	144.0808	161.0841	0.8371	2.8067	Benzene and substituted derivatives	Benzene and substituted derivatives	1.1910903255920449	0.021697117443556777	2.9498392190699088	1.560636322551826	up
MW0108901	N-Phenylacetylaspartic acid	C12H13NO5	269.1147	1437.0661	0.5148	4.3113	Organic acids and derivatives	Carboxylic acids and derivatives	1.489871192961573	0.001924112542526753	2.9467059865707377	1.5591031198860956	up
MEDP0250	Riboflavin	C17H20N4O6	377.1455	376.1383	0.8868	3.0676	CoEnzyme and vitamins	CoEnzyme and vitamins	1.467595429231405	0.002252106843729945	2.9434836404984748	1.5575246093604256	up
MEDL02011	Quinidine	C20H24N2O2	325.1994	324.1838	0.6894	6.6132	Alkaloids	Quinoline alkaloids	1.278010458417919	0.012081021929649894	2.9430707861655963	1.5573222421158681	up
MW0058335	PE(18:3(6Z,9Z,12Z)/22:1(13Z))	C45H82NO8P	834.5472	876.8146	0.5251	8.3204	Lipids and lipid-like molecules	Glycerophospholipids	1.1919475131652404	0.02524302918954093	2.9355455109386925	1.55362862353874	up
MW0011861	1,2-Diarachidonoyl-sn-glycero-3-phosphocholine	C48H80NO8P	868.5227	829.5622	0.5826	9.1751	Lipids and lipid-like molecules	Glycerophospholipids	1.1120680977707924	0.031404981800938064	2.933887644178906	1.5528136227871523	up
MW0006100	Aurin	C19H14O3	291.0872	290.0943	0.748	4.0167	Benzenoids	Benzene and substituted derivatives	1.466806006939331	0.0018311192113172484	2.9290686379203934	1.5504420008059214	up
MW0140188	(10S)-Juvenile hormone III diol	C16H28O4	286.2099	284.1988	0.9931	6.6125	Lipids and lipid-like molecules	Prenol lipids	1.112959456772083	0.033791395455302575	2.9239599700267203	1.5479235604561332	up
MW0105096	3-Methylbutyl 2-oxopropanoate	C8H14O3	157.0864	1493.1287	0.5659	2.9855	Organic acids and derivatives	Keto acids and derivatives	1.3529965947511742	0.003954379336711995	2.9227718616652054	1.5473372232974834	up
MW0119848	4-(2-Hydroxyethyl)piperazine-1-ethanesulfonic acid	C8H18N2O4S	237.08900000000003	238.0987	0.5854	3.5424	--	--	1.2787771240893515	0.009997042911837931	2.92276707087528	1.5473348585372977	up
MW0106001	Batimastat	C23H31N3O4S2	460.1774	477.1756	0.6744	2.0099	Organic acids and derivatives	Carboxylic acids and derivatives	1.3233330734922664	0.00605957893893931	2.9174746544035237	1.5447201225563842	up
MW0141407	15(R),19(R)-hydroxy PGF2	C20H34O6	388.2696	370.2355	0.518	7.1165	--	--	1.3685192676580382	0.005330852027571732	2.9141940185820134	1.5430969310496865	up
MW0107991	Lys Arg	C12H26N6O3	303.2174	302.2066	0.5621	6.6125	--	--	1.1076016950462393	0.0348605768405199	2.909529786415118	1.5407860158068536	up
MW0114753	Lobeline	C22H27NO2	384.2183	337.2042	0.535	8.9841	Organic oxygen compounds	Organooxygen compounds	1.040005104278896	0.04327233822622716	2.908996975427227	1.540521796425016	up
MW0133206	3-O-Methylquercetin	C16H12O7	317.066	316.0583	0.6876	3.5885	Phenylpropanoids and polyketides	Flavonoids	1.4165137615258887	0.003499948750945728	2.8951449910289995	1.5336356012716903	up
MW0006328	Benzyloxycarbonylglycine	C10H11NO4	252.1076	209.0688	0.9358	4.3113	Benzenoids	Benzene and substituted derivatives	1.428927815677817	0.004182065330462489	2.8910293169733605	1.5315832387830108	up
MW0125187	Minaprine	C17H22N4O	299.1847	298.1794	0.6794	6.4218	Organoheterocyclic compounds	Diazines	1.1870381637113867	0.02166832672101637	2.8738649982878663	1.5229922918317236	up
MW0014652	5,8,12-Trihydroxy-9-octadecenoic acid	C18H34O5	348.2747	1535.1757	0.6711	7.5742	Lipids and lipid-like molecules	Fatty Acyls	1.2000611848347071	0.01944981191472154	2.86480057538068	1.5184347135290932	up
MW0142189	26-Hydroxy-24-epi-brassinolide	C28H48O7	497.3469	496.34	0.7136	9.7045	Lipids and lipid-like molecules	Steroids and steroid derivatives	1.0931506161399678	0.03891227715912623	2.85621284407458	1.5141034925495225	up
MW0108240	Methoxyacetic acid	C3H6O3	181.0697	90.0317	0.7978	0.9293	Organic acids and derivatives	Carboxylic acids and derivatives	1.4517442387971389	0.00188181960457701	2.8531820357055446	1.5125717951606803	up
MW0015173	7alpha-Hydroxydehydroepiandrosterone	C19H28O3	374.202	304.2038	0.9762	7.4115	Lipids and lipid-like molecules	Steroids and steroid derivatives	1.1950662219542805	0.009706711320371292	2.8501051997189046	1.5110151713165845	up
MW0157859	Thr Val Glu Thr Trp	C29H42N6O10	635.302	634.2962	0.574	4.4177	--	--	1.3773779200484564	0.005325956490398749	2.8455508485943133	1.5087079599517967	up
MW0155928	Pro Lys Ile Val Lys	C28H53N7O6	584.4158	583.4057	0.7426	10.0313	--	--	1.1697411607996109	0.02695342321480944	2.83368390025764	1.502678833426944	up
MW0116833	13(S)-HODE-biotin	C28H48N4O4S	519.3291	536.3396	0.7116	9.6985	Organoheterocyclic compounds	Biotin and derivatives	1.0497824391938242	0.04823907485234278	2.824810377703946	1.4981540263498134	up
MW0062269	Prostaglandin G2	C20H32O6	736.4355	368.2199	0.9948	7.7605	Lipids and lipid-like molecules	Fatty Acyls	1.2498835413710216	0.009368774649270413	2.8230489146259345	1.4972541264060582	up
MW0145417	Arg Leu Leu	C18H36N6O4	418.3076	400.2798	0.5535	8.8363	--	--	1.2506578064177158	0.014003296589744536	2.8102091197147536	1.4906774915671632	up
MW0138622	Kaempferol 3-[glucosyl-(1->3)-rhamnosyl-(1->6)-galactoside]	C33H40O20	757.2173	1240.847	0.5941	3.579	Phenylpropanoids and polyketides	Flavonoids	1.221770214872185	0.015455035752107138	2.8052959524837946	1.4881529799812223	up
MW0155222	Phe Ile Asp Leu Asn	C29H44N6O9	621.3097	620.317	0.6156	11.4542	--	--	1.092988097228576	0.033025731137327555	2.8017861485896054	1.4863468436548022	up
MW0144650	Ala Leu Val Arg	C20H39N7O5	458.3079	457.3013	0.8028	2.2923	--	--	1.3035719865954671	0.0036918894563708225	2.78156626335657	1.4758974743412026	up
MW0155493	Phenylmethanesulfonyl fluoride;Benzenemethanesulfonyl fluoride;PMSF	C7H7FO2S	366.0613	174.0151	0.5193	4.3446	Benzenoids	Benzene and substituted derivatives	1.5206514540694172	0.0011986754003163599	2.7779417124776105	1.4740163286203487	up
MW0126149	Pipemidic acid	C11H14O	605.2568	162.1045	0.5739	3.1208	--	--	1.5104089757770711	0.00047442516446270056	2.7466201670552595	1.457657412417929	up
MW0116752	1-[(1-Methylpiperidin-2-yl)methyl]-3-(1-naphthoyl)indole	C26H26N2O	405.18800000000016	382.2045	0.6038	6.1997	Organoheterocyclic compounds	Indoles and derivatives	1.3164651267800875	0.01098716702667386	2.7457659419359493	1.4572086506852642	up
MW0168684	ADENINE	C5H5N5	136.0619	135.0545	0.8261	1.7983	--	--	1.5617199936857713	8.344322583060088e-05	2.742252022751152	1.4553611660351056	up
MW0123338	Cinoxacin	C12H10N2O5	263.0656	262.059	0.7881	2.9187	Organoheterocyclic compounds	Diazanaphthalenes	1.5411650573632079	0.0007813127419523327	2.73000895916711	1.4489056856963187	up
MEDP1678	Thr-Val-Leu	C15H29N3O5	332.2181	331.2107	0.7701	2.5692	Amino acid and Its metabolomics	Small Peptide	1.4386739608323085	0.0004836748071805821	2.728893045772006	1.4483158517912051	up
MEDP0179	Uridine	C9H12N2O6	245.0769	244.0695	0.8690000000000001	1.2265	Nucleotide And Its metabolomics	Nucleotide and Its metabolomics	1.5740466048699926	0.00012195343315216897	2.71359347527434	1.4402046061160974	up
MW0157356	Taxa-4(20),11(12)-dien-5alpha-ol;Taxa-4(20),11-dien-5alpha-ol	C20H32O	328.2202	288.2453	0.6421	8.5408	Lipids and lipid-like molecules	Prenol lipids	1.1526311146674375	0.01872170066464272	2.7123719618713404	1.4395550364205023	up
MW0161662	(8R,10S,13S,17S)-17-hydroxy-10-(hydroxymethyl)-13-methyl-1,2,6,7,8,9,11,12,14,15,16,17-dodecahydrocyclopenta[a]phenanthren-3-one	C19H28O3	373.1989	304.2038	0.9846	7.4115	Lipids and lipid-like molecules	Steroids and steroid derivatives	1.17970971570346	0.01104187266672702	2.70229191536304	1.4341835303625945	up
MW0014659	5,9-Epidioxy-3-hydroxyergost-7-en-6-one	C28H44O4	445.3307	1296.9096	0.6742	10.5185	Lipids and lipid-like molecules	Steroids and steroid derivatives	1.0720190472128055	0.043294646651352416	2.7012311893700094	1.433617120588866	up
MEDP1096	PC(12:0/12:0)	C28H56NO8P	513.3414	548.3535	0.6618	8.5409	GP	PC	1.1637000988041746	0.022899135144581168	2.6925206598936806	1.4289574147088726	up
MEDP0178	Uracil	C4H4N2O2	113.0344	112.027	0.9253	1.2265	Nucleotide And Its metabolomics	Nucleotide and Its metabolomics	1.5916597777796642	5.697109122413282e-05	2.690968885832584	1.4281257099993114	up
MEDP0208	Succinic Acid	C4H6O4	137.064	118.0266	0.9932	1.7984	Organic acid And Its derivatives	Organicacid and Its derivatives	1.645704692769537	2.134614365717337e-06	2.683143620574328	1.4239242797735516	up
MW0162672	(2S)-2-azaniumyl-3-[6-[[(E)-4-hydroxy-3-methylbut-2-enyl]amino]purin-9-yl]propanoate	C13H18N6O3	349.1799	306.144	0.939	2.0794	--	--	1.4972069158063603	0.00013251074281232024	2.6570180576090565	1.4098080326965077	up
MEDP0160	Adenosine	C10H13N5O4	268.1052	267.0968	0.8444	1.7983	Nucleotide And Its metabolomics	Nucleotide and Its metabolomics	1.6480174955628122	4.744881682135882e-06	2.6568338242606853	1.4097079950800753	up
MW0143431	4-O-beta-D-Mannopyranosyl-D-glucopyranose	C12H22O11	683.2243	342.1162	0.9859	0.8017	Organic oxygen compounds	Organooxygen compounds	1.4236732042471014	0.0008087286457346861	2.6565811505450627	1.409570783468148	up
MW0015396	9(S)-Hpode	C18H32O4	313.252	312.2301	0.5264	9.1751	Lipids and lipid-like molecules	Fatty Acyls	1.352275331610976	0.002986038349254523	2.6556090408758406	1.4090427685574975	up
MW0007244	Ginkgolic acid I	C22H34O3	383.2038	346.2508	0.5365	6.6048	Benzenoids	Benzene and substituted derivatives	1.0920456214579684	0.029910314927189062	2.652278320267446	1.4072321744705931	up
MW0007393	Irenolone	C19H12O3	289.0816	1320.9096	0.7323	4.0158	Benzenoids	Naphthalenes	1.4531137089429589	0.002957668240808639	2.6336073293535214	1.3970402559113868	up
MW0152337	Leu Gly Arg Leu Val	C25H48N8O6	557.3675	556.3697	0.5116	8.8215	--	--	1.185138026253714	0.0232503708129466	2.6330078382075817	1.3967118161528234	up
MW0145572	Arg Val Ser	C14H28N6O5	361.2222	360.2121	0.5912	6.0958	--	--	1.1013968771470413	0.026167302562316908	2.632324066056081	1.3963371105443074	up
MW0114417	Ethanone, 1-[5-ethyl-2-hydroxy-4-[[6-methyl-6-(2H-tetrazol-5-yl)heptyl]oxy]phenyl]-	C19H28N4O3	383.2061	360.2161	0.6965	6.1836	Organic oxygen compounds	Organooxygen compounds	1.596398835166832	9.275113359945921e-05	2.6263338975439567	1.3930503441471802	up
MW0012773	1-arachidonoyl-sn-glycero-3-phospho-1D-myo-inositol	C29H49O12P	638.3364	1493.1287	0.5086	11.4542	--	--	1.073399685015736	0.03707351748152057	2.621363308401552	1.390317318147705	up
MW0144741	Ala Thr Asp	C11H19N3O7	323.1588	305.1223	0.5362	2.3157	--	--	1.3935186999267002	0.004023656478185821	2.6166183759967434	1.3877035280527021	up
MEDP1664	Glu-Leu-Arg	C17H32N6O6	417.2456	416.2383	0.7503	1.3762	Amino acid and Its metabolomics	Small Peptide	1.3229157935672682	0.003298588916378201	2.6109260256882814	1.3845615829343565	up
MW0103657	S-(5'-Adenosyl)-L-homocysteine	C14H20N6O5S	403.1635	384.1216	0.7617	1.3292	Nucleosides, nucleotides, and analogues	5'-deoxyribonucleosides	1.4193820961242567	0.002657097510601345	2.6055448015814684	1.3815850617023786	up
MW0156310	Quinidinone	C20H22N2O2	362.1352	322.1681	0.9778	6.6144	Organoheterocyclic compounds	Quinolines and derivatives	1.051636145111108	0.04426192054143865	2.6025443820025083	1.3799227664637743	up
MW0108588	N5-(1-Iminobutyl)-L-ornithine	C9H19N3O2	420.3319	201.1477	0.5061	7.1621	Organic acids and derivatives	Carboxylic acids and derivatives	1.3387834747300946	0.007518598437328953	2.5961158571641483	1.3763547680930135	up
MEDP0167	Guanosine	C10H13N5O5	285.1020000000001	283.0917	0.9921	1.1677	Nucleotide And Its metabolomics	Nucleotide and Its metabolomics	1.1178216352872463	0.022213386630486703	2.5784732877617684	1.3665170997107792	up
MW0149780	Gln Phe Ile Lys	C26H42N6O6	535.3236	534.3166	0.5972	8.5407	--	--	1.137043485562382	0.028441166217203964	2.575323577799092	1.3647537118134063	up
MEDP0179	Uridine	C9H12N2O6	243.0615	244.0695	0.8442	1.2077	Nucleotide And Its metabolomics	Nucleotide and Its metabolomics	1.3729940153002391	0.003301320903632064	2.5674523019871374	1.3603374744691483	up
MW0055881	PA(20:0/18:2(9Z,12Z))	C41H77O8P	808.4609	728.5356	0.9372	7.1622	Lipids and lipid-like molecules	Glycerophospholipids	1.2788629112417098	0.011176144316188534	2.565579277187625	1.3592846059379613	up
MW0169241	GUANOSINE	C10H13N5O5	284.0997	283.0917	0.7937	1.4748	--	--	1.5074839131367583	0.0012887631604588373	2.5583540375280207	1.3552159252215186	up
MW0127950	(2E)-3-(4-hydroxyphenyl)-1-{2,4,6-trihydroxy-3-[(2E)-4-hydroxy-3-methylbut-2-en-1-yl]-5-(3-methylbut-2-en-1-yl)phenyl}prop-2-en-1-one	C25H28O6	425.1727	424.1886	0.5293	3.0473	Phenylpropanoids and polyketides	Linear 1,3-diarylpropanoids	1.485623774641858	0.002071244402717538	2.5526158561865686	1.3519764425340786	up
MW0150396	Gly Leu Ala	C11H21N3O4	536.3272	259.1532	0.5403	8.5407	--	--	1.059481029061474	0.04048476778676891	2.549656799922659	1.3503030641930929	up
MW0056798	PC(14:0/20:4(5Z,8Z,11Z,14Z))	C42H76NO8P	755.5489	1029.6025	0.8351	10.9478	Lipids and lipid-like molecules	Glycerophospholipids	1.0139486424771529	0.04149724481738113	2.5411761292015997	1.3454963722112698	up
MW0006078	Aromatic primary alcohol;Aromatic alcohol	C7H8O	91.0542	108.0575	0.9495	1.9	Benzenoids	Benzene and substituted derivatives	1.1883366637729371	0.014521994116688659	2.540925868706523	1.3453542855016296	up
MW0009806	Sulfanitran	C14H13N3O5S	380.0321	335.0576	0.5069	4.0158	Benzenoids	Benzene and substituted derivatives	1.4927073753311555	0.0018264137236702386	2.5401848790682813	1.3449335026700455	up
MW0009037	N-Desmethylselegiline	C12H15N	364.2695	173.1204	0.5216	6.2452	Benzenoids	Benzene and substituted derivatives	1.0505674517179824	0.04582961903003483	2.5324519263899665	1.3405348825635988	up
MW0147552	cis-Abienol;(12Z)-Labda-12,14-dien-8alpha-ol	C20H34O	405.1363	290.261	0.8176	7.409	Lipids and lipid-like molecules	Prenol lipids	1.1683690939747229	0.012374357508273613	2.526620105890451	1.337208761809824	up
MW0049282	DG(10:0/15:0/0:0)	C28H54O5	538.3430000000002	470.3971	0.6206	8.7327	Lipids and lipid-like molecules	Glycerolipids	1.1848365846149218	0.013352030933277984	2.5238281045289974	1.3356136531141836	up
MW0168644	5'-METHYLTHIOADENOSINE	C11H15N5O3S	364.0462	297.0896	0.5268	4.0204	--	--	1.596527286622783	0.00017883431489145333	2.520069843335667	1.33346371834332	up
MW0149016	Estradiol-17 3-sulfate	C18H24O5S	351.1314	352.1344	0.5575	1.8723	--	--	1.4949453319813295	0.000687814114846655	2.519899528898486	1.3333662130706252	up
MW0155095	Phe Arg Leu Phe Leu	C36H54N8O6	695.4312	694.4166	0.5341	7.3228	--	--	1.1938603130062464	0.019795793215028844	2.5129288309838933	1.3293698130249645	up
MW0145506	Arg Ser Val	C14H28N6O5	378.2492	360.2121	0.5689	6.0958	--	--	1.0990273201170917	0.035867447266046834	2.5106006993240984	1.3280325921644809	up
MW0153318	Magnoline	C36H40N2O6	597.2756	596.2886	0.5409	9.0954	Organoheterocyclic compounds	Isoquinolines and derivatives	1.1237038434239914	0.024774889906612446	2.50923793285673	1.3272492775535059	up
MW0010819	(10E,15Z)-9,12,13-Trihydroxyoctadeca-10,15-dienoic acid	C18H32O5	346.2586	328.225	0.6382	7.3675	Lipids and lipid-like molecules	Fatty Acyls	1.2288281995638368	0.013651245811483621	2.5080760620730094	1.326581101214738	up
MEDN1290	17,20-dimethyl prostaglandin f1	C22H40O5	767.5667	384.2876	0.8074	9.1563	Hormones and hormone related compunds	Hormones and hormone related compunds	1.1145467125205313	0.030511170988686807	2.506991465260356	1.3259570847049518	up
MW0153715	Met Val His	C16H27N5O4S1	771.3308	385.1784	0.5482	2.8898	--	--	1.4776380311634034	0.00013069543877435307	2.5061243120079126	1.3254579788534009	up
MW0144115	9,10-Epoxy-18-hydroxystearate	C18H34O4	316.2565	314.2457	0.9687	7.75	Lipids and lipid-like molecules	Fatty Acyls	1.4109864388846656	0.0015474941239356403	2.5057463603210723	1.3252403878336072	up
MW0012405	15(S)-Fluprostenol	C23H29F3O6	457.176	458.1916	0.691	8.2557	Lipids and lipid-like molecules	Fatty Acyls	1.3274163182743974	0.0017023709922378493	2.505199057219319	1.3249252411265051	up
MW0141804	1-O-[2-(Acetylamino)-2-deoxy-alpha-D-glucopyranosyl]-D-myo-Inositol;1-(2-Acetamido-2-deoxy-alpha-D-glucopyranosyl)-1D-myo-inositol	C14H25NO11	430.1568	383.1428	0.9383	1.4452	Organic oxygen compounds	Organooxygen compounds	1.4905206679106082	0.0004159821216891197	2.5003088640553126	1.3221063225343297	up
MW0126261	Propyphenazone	C14H18N2O	277.1556	230.1419	0.6425	4.6496	Organoheterocyclic compounds	Azoles	1.1827231388409245	0.012632122378414145	2.499949547462676	1.3218989795434135	up
MW0139227	Oxyresveratrol	C14H12O4	286.1037	244.0736	0.6635	1.4748	Phenylpropanoids and polyketides	Stilbenes	1.5578725814455827	0.00033068823983240333	2.4943161894004544	1.318644358498041	up
MW0106025	Bestatin(hydrochloride)	C16H24N2O4	309.1812	308.1736	0.6901	2.3451	Organic acids and derivatives	Peptidomimetics	1.1357866883428245	0.02840638540497866	2.4731345446786475	1.3063407280661508	up
MW0140022	(-)-alpha-Pinene;(1S,5S)-2,6,6-Trimethylbicyclo[3.1.1]hept-2-ene	C10H16	159.1165	136.1252	0.7097	7.409	Lipids and lipid-like molecules	Prenol lipids	1.163151247839477	0.02183915461709976	2.4687067482042164	1.3037554723501052	up
MW0169587	OLEANDRIN	C32H48O9	577.3334	576.3298	0.5849	8.6435	--	--	1.0951911900068017	0.03632115877434109	2.44905311666702	1.2922240643555774	up
MW0153190	Lys Tyr Val Lys	C26H44N6O6	537.3393	536.3322	0.605	8.7322	--	--	1.217305952487314	0.017277569602335625	2.4449622929286354	1.2898122155969984	up
MW0002151	2,3-Dihydro-2,3-dihydroxy-4-(4-hydroxyphenyl)-1H-phenalen-1-one	C19H14O4	305.0761	1366.9879	0.5539	2.9182	Benzenoids	Naphthalenes	1.5798261834198175	3.6335200759032015e-05	2.4195897857848547	1.2747624755251756	up
MW0063221	Psychosine	C24H47NO7	444.332	461.3353	0.583	8.3639	Lipids and lipid-like molecules	Sphingolipids	1.3841834399310389	0.005125388244527407	2.417451713067733	1.273487073150532	up
MW0056361	PA(22:6(4Z,7Z,10Z,13Z,16Z,19Z)/18:1(11Z))	C43H71O8P	794.5078	746.4887	0.9416	7.1623	Lipids and lipid-like molecules	Glycerophospholipids	1.1364631143030095	0.02109008957477036	2.4016666911912568	1.2640359444109297	up
MW0106502	D-Leucinamide, N-[(phenylmethoxy)carbonyl]-L-leucyl-N-[(1S)-1-formyl-3-methylbutyl]-	C26H41N3O5	458.3087	475.3046	0.6579	1.784	Organic acids and derivatives	Carboxylic acids and derivatives	1.37002357959275	0.003118313547771741	2.4015104051582816	1.263942059434261	up
MW0114347	Dopamine quinone	C8H9NO2	325.1132	151.0633	0.7014	2.2386	Organic oxygen compounds	Organooxygen compounds	1.3863474894122505	0.0014493013965004575	2.39670811118008	1.261054217625059	up
MW0151364	Ile Asp Glu	C15H25N3O8	376.1714	375.1642	0.6496	1.2369	--	--	1.402655539976429	0.001207436783706825	2.3953691662406538	1.2602480164047645	up
MW0110466	Vildagliptin	C17H25N3O2	345.2271	303.1947	0.5576	5.7239	Organic acids and derivatives	Carboxylic acids and derivatives	1.0845626476286816	0.03752344818417259	2.391219088660762	1.2577463189429217	up
MW0145690	Asn Asn Leu Asn Val	C23H40N8O9	573.2928	572.2918	0.5243	6.5836	--	--	1.0098437082197098	0.0485374768833651	2.3817784327923617	1.2520392113635397	up
MW0063668	Sterebin B	C20H32O5	375.2129	352.225	0.7943	7.5887	Lipids and lipid-like molecules	Prenol lipids	1.1583686422988255	0.016961410467601048	2.3793461442635566	1.250565168478506	up
MW0063667	Sterebin A	C18H30O4	293.211	310.2144	0.5952	9.3968	Lipids and lipid-like molecules	Prenol lipids	1.149449781112331	0.02091832985892859	2.3567949071652987	1.2368262179476583	up
MW0015696	Alpha-dihydroartemisinin	C15H24O5	285.17	284.1624	0.5714	4.4462	Lipids and lipid-like molecules	Prenol lipids	1.1604586448187442	0.02777796093296767	2.347776998363229	1.2312953817723655	up
MEDN1050	Phenyl acetate	C8H8O2	135.0445	136.0524	0.8196	3.8428	Benzene and substituted derivatives	Benzene and substituted derivatives	1.5916521446230565	7.310312422067678e-06	2.3471864294365155	1.2309324350191186	up
MW0150965	His His Val Ala Tyr	C29H39N9O7	626.3009	625.2972	0.5466	2.272	--	--	1.338324797705323	0.003014283334689584	2.346429532813525	1.2304671344820903	up
MW0147757	Constanolactone E methyl acetonide	C24H40O5	817.5764	408.2876	0.7344	9.4109	--	--	1.063375014244933	0.037425783511826016	2.343415774335893	1.2286129432566422	up
MW0125723	N-Desethylamodiaquine	C18H18ClN3O	326.11	327.1138	0.5097	1.78	Organoheterocyclic compounds	Quinolines and derivatives	1.041015860174628	0.03645079879944308	2.3417118610312544	1.2275635684799415	up
MW0056741	Palmitoleoyl 3-carbacyclic phosphatidic acid	C20H37O5P	799.4802	388.2379	0.7403	6.9393	Lipids and lipid-like molecules	Fatty Acyls	1.0345418998752502	0.04639522366211287	2.336681748727451	1.2244612553881002	up
MW0152869	Lys Arg Leu	C18H37N7O4	416.3007	415.2907	0.5533	8.8366	--	--	1.192287224821679	0.02285970883131964	2.3365787581381787	1.2243976663747302	up
MW0137002	7-Hydroxy-3-(3-hydroxy-2,4-dimethoxyphenyl)-1-benzopyran-4-one	C17H14O6	313.0709	314.079	0.5889	7.1001	Phenylpropanoids and polyketides	Isoflavonoids	1.4673269583449753	0.00077610418783695	2.33385844911657	1.22271706278033	up
MW0115251	Salidroside	C14H20O7	386.0882	300.1209	0.7146	1.9002	Organic oxygen compounds	Organooxygen compounds	1.167531994517811	0.020609042968407317	2.3337849483382054	1.2226716269149789	up
MW0010348	3-Allyl-1-cyclohexene	C9H14	123.1167	1390.9879	0.6804	4.0175	Hydrocarbons	Unsaturated hydrocarbons	1.2644182618291238	0.01602744981931687	2.3324466198179494	1.2218440640544588	up
MW0013350	27-Norcholestanehexol	C26H46O6	472.3622	499.9287	0.5005	8.4384	Lipids and lipid-like molecules	Steroids and steroid derivatives	1.2793637788299683	0.005302168427751254	2.3230613061283005	1.2160272277068622	up
MW0140198	(13E)-Labda-7,13-dien-15-ol	C20H34O	330.2358	290.261	0.6444	6.2436	Lipids and lipid-like molecules	Prenol lipids	1.0765874990972055	0.028879666974187024	2.321223466813362	1.2148854192546927	up
MW0110461	Velcorin	C4H6O5	135.03	1423.0505	0.5793	1.4895	Organic acids and derivatives	Organic carbonic acids and derivatives	1.613190351862127	6.46455322218314e-05	2.3146416564046444	1.2107888584771656	up
MW0153678	Met Thr Ile	C15H29N3O5S1	364.1971	363.1828	0.5107	4.4407	--	--	1.222369237862814	0.017209562284494568	2.314063816181478	1.2104286509704851	up
MW0145394	Arg Ile Leu	C18H36N6O4	818.5808	400.2798	0.6924	9.41	--	--	1.1417484112822598	0.026230880254662938	2.298929227149018	1.2009620531753786	up
MW0011672	(Z)-3,3,4,4-Tetradeuterio-7-[(2R,3S,4S)-4,6-dihydroxy-2-[(E,3S)-3-hydroxyoct-1-enyl]oxan-3-yl]hept-5-enoic acid	C20H30D4O6	392.3008	374.2602	0.5413	7.162000000000001	Lipids and lipid-like molecules	Fatty Acyls	1.167554765338209	0.022957052523820614	2.2947007144939526	1.198306002932597	up
MW0161574	(3S,4S,5S,10S,13R,14R,17R)-4,10,13,14-tetramethyl-17-[(2R)-6-methylheptan-2-yl]-1,2,3,4,5,6,7,11,12,15,16,17-dodecahydrocyclopenta[a]phenanthren-3-ol	C29H50O	500.3665	414.3862	0.7214	10.5332	Lipids and lipid-like molecules	Steroids and steroid derivatives	1.1766195944426752	0.013478178079511731	2.2921928655520762	1.1967284378423595	up
MEDL00865	Guanosine-5'-diphosphate	C10H15N5O11P2	485.048	443.0238	0.6773	1.4926	Nucleotide And Its metabolomics	Nucleotide and Its metabolomics	1.4531373647120014	0.0016530703716208506	2.291599601758898	1.1963549921668677	up
MW0007455	Karbutilate	C14H21N3O3	321.1909	279.1583	0.5807	4.4496	Benzenoids	Benzene and substituted derivatives	1.0850601182845638	0.033202187798773944	2.2848035723584577	1.192070140178093	up
MW0152130	L-Arogenate;L-Arogenic acid;Pretyrosine	C10H13NO5	262.0478	227.0794	0.9255	1.8854	Organic acids and derivatives	Carboxylic acids and derivatives	1.183276695710035	0.012637290070025536	2.2808111379348044	1.1895469895498822	up
MW0151708	Imino-tryptophan	C11H10N2O2	249.0888	202.0742	0.5464	2.9097	Organoheterocyclic compounds	Indoles and derivatives	1.3272417636775955	0.005188966962816353	2.277731722359147	1.1875978323776135	up
MW0055444	Octanoylcarnitine	C15H29NO4	288.2173	287.2097	0.8316	4.598	Lipids and lipid-like molecules	Fatty Acyls	1.4561770260216185	0.001004791406059237	2.2755603441669043	1.1862218447442512	up
MW0012274	13,14-Dihydro PGF-1a	C20H38O5	715.5157	358.2719	0.7899	8.2558	Lipids and lipid-like molecules	Fatty Acyls	1.0841198725428145	0.012154527484876946	2.2731954727854244	1.18472174728504	up
MW0165281	(1S,3S,4S,6S,7R,8R,10Z,12S)-4-(hydroxymethyl)-1,8-dimethyl-12-propan-2-yltricyclo[9.3.0.03,7]tetradec-10-ene-6,8-diol	C20H34O3	346.2451	322.2508	0.9353	8.8369	Organic oxygen compounds	Organooxygen compounds	1.2171986708948084	0.013562344914632029	2.2690031462822096	1.1820586095050032	up
MW0141322	12alpha-Fluoro-11beta,17beta-dihydroxyandrosta-1,4-dien-3-one	C19H25FO3	338.2176	320.1788	0.5422	4.4496	Lipids and lipid-like molecules	Steroids and steroid derivatives	1.1650105352507978	0.021919355066819714	2.2591968433304466	1.175809977913174	up
MEDL02347	L-Phenylalanine	C9H11NO2	164.0712	165.0705	0.8225	1.8723	Amino acids and derivatives	Amino acids and derivatives	1.532105760488421	0.00029227342290070893	2.259155664339563	1.1757836812814535	up
MW0134501	5-hydroxy-2-(4-methoxyphenyl)-8-(3-methylbut-2-en-1-yl)-3,7-bis({[3,4,5-trihydroxy-6-(hydroxymethyl)oxan-2-yl]oxy})-4H-chromen-4-one	C33H40O16	675.2281	692.2316	0.5278	4.2853	Phenylpropanoids and polyketides	Flavonoids	1.5154666458121615	0.0002098863985191028	2.2558256848620792	1.1736555902095498	up
MW0010819	(10E,15Z)-9,12,13-Trihydroxyoctadeca-10,15-dienoic acid	C18H32O5	655.4414	328.225	0.7443	7.3406	Lipids and lipid-like molecules	Fatty Acyls	1.042260232478846	0.03388650604172043	2.253976781270354	1.172472654055543	up
MW0007576	Mefluidide	C11H13F3N2O3S	311.0633	310.0599	0.5607	4.0204	Benzenoids	Benzene and substituted derivatives	1.140392625788191	0.03454995591437645	2.252708871819842	1.1716608793432073	up
MW0169050	dexamethasone phosphate	C22H30FO8P	471.1546	472.1662	0.6824	7.9707	--	--	1.427359919444931	0.0013845265818714333	2.252529295034185	1.1715458689803069	up
MW0123749	Dodecahydro-8''-hydroxy-1'',2'(5'h)-furan-5',5''-[5h-1,4a](methanoxymethano)naphthalen]-2,9''-dione	C20H28O6	365.1956	364.1886	0.5824	6.1841	Organoheterocyclic compounds	Lactones	1.1077416148669457	0.04011782361288898	2.2509038181046725	1.1705044112531855	up
MEDL02426	Methyl Benzoate	C8H8O2	137.0598	136.0524	0.7881	3.8283	Phenolic acids	Phenolic acids	1.5444470376203194	0.0005382971997670518	2.250066992265619	1.1699679560959029	up
MEDN0797	PGJ2	C20H30O4	318.2143	334.2144	0.9581	9.1022	Oxidized lipids	Oxidized lipids	1.1026897599120664	0.030115360148369994	2.2488928631196656	1.1692149330020607	up
MW0158870	Val Ala Gly Val Ala	C18H33N5O6	457.2765	415.2431	0.5427	3.2503	--	--	1.3648670416322717	0.0017263235101132974	2.2453844909494127	1.1669625076348678	up
MW0158544	Tyr Lys Met	C20H32N4O5S1	441.2097	440.2093	0.6089	4.2095	--	--	1.1680962871410914	0.02045364740756856	2.2441527855825814	1.1661709003222671	up
MEDP1647	2-Amino-1-phenylethanol	C8H11NO	120.0811	137.0841	0.8645	1.8952	Alcohol and amines	Alcohols	1.555294191398112	0.0003769040838288408	2.236475821557962	1.1612271615139944	up
MEDN1036	3,4-Dihydroxyphenylethanol	C8H10O3	137.0598	154.063	0.7852	2.5899	Benzene and substituted derivatives	Benzene and substituted derivatives	1.5122651811917092	8.751959117402491e-05	2.2343725131931977	1.1598697310918606	up
MW0055905	PA(20:0/a-13:0)	C36H71O8P	727.5175	662.4887	0.7718	8.0866	Lipids and lipid-like molecules	Glycerophospholipids	1.0767071302333626	0.03359321243136384	2.2320427091338466	1.15836463275227	up
MW0109521	Racecadotril	C21H23NO4S	403.1624	385.1348	0.5174	6.2347	Organic acids and derivatives	Carboxylic acids and derivatives	1.1244996062703847	0.02691422026110506	2.228120592067908	1.1558273174491216	up
MW0122491	7-Hydroxymethotrexate	C20H22N8O6	469.1395	470.1662	0.706	7.7607	Organoheterocyclic compounds	Pteridines and derivatives	1.2208586896494622	0.008346676229290988	2.227867210984042	1.1556632453512168	up
MW0152386	Leu Ile Tyr	C21H33N3O5	452.2133	407.242	0.5768	2.6157	--	--	1.5385103085408682	3.355260027846494e-05	2.2238651606715765	1.1530693159715677	up
MW0103046	Ursodeoxycholic acid	C24H40O4	375.2901	392.2927	0.7081	9.7627	Lipids and lipid-like molecules	Steroids and steroid derivatives	1.4152643300861159	0.0005982361674745517	2.2211448332265484	1.151303469141124	up
MW0114814	Melezitose	C18H32O16	543.131	504.169	0.8076	0.7754	Organic oxygen compounds	Organooxygen compounds	1.3607327564928948	0.006215331034003408	2.218944980733536	1.1498738960130916	up
MW0147490	Cinchoninone;Cinchonan-9-one	C19H20N2O	316.1476	292.1576	0.8555	4.1635	Organoheterocyclic compounds	Quinolines and derivatives	1.1610589734126364	0.030297811136512268	2.2155931775666096	1.1476930011576638	up
MW0004154	3-Nitrophenylhydrazine	C6H7N3O2	171.0931	153.0538	0.5345	2.8067	Benzenoids	Benzene and substituted derivatives	1.2199024077327585	0.019027446576678216	2.212671547990806	1.1457893113951294	up
MW0156868	Ser Phe Asp	C16H21N3O7	368.1458	367.138	0.8418	2.0933	--	--	1.4009853300451622	0.003492459412595748	2.210230633857828	1.1441969202783409	up
MW0138008	DL-3-Phenyllactic acid	C9H10O3	149.0591	166.063	0.6940000000000001	1.8952	Phenylpropanoids and polyketides	Phenylpropanoic acids	1.5222441662104418	0.0006904625950750537	2.2097266300757807	1.1438679018210665	up
MW0149843	Gln Tyr Phe	C23H28N4O6	457.2096	456.2009	0.5817	7.691	--	--	1.2253933013946716	0.012509060978669778	2.203948976995072	1.1400908248672177	up
MW0054374	Linoleic acid	C18H32O2	280.2355	280.2402	0.9839	11.078	Lipids and lipid-like molecules	Fatty Acyls	1.3918142114045875	0.004025839096310842	2.201890637300864	1.1387428154318722	up
MEDP1436	Carnitine C6:0	C13H25NO4	260.186	260.1856	0.7079	3.342	FA	CAR	1.4197868405454503	0.0021048725895255285	2.1782802929322482	1.1231896065825342	up
MW0141666	19(R)-hydroxy-PGF1	C20H36O6	743.4939	372.2512	0.7794	8.1806	Lipids and lipid-like molecules	Fatty Acyls	1.1373414782516424	0.02272273387410096	2.173588448295512	1.1200788033781457	up
MW0015494	9S,11R-Dihydroxy-15-oxo-13E-prostenoic acid	C20H34O5	355.2481	354.2406	0.5575	9.4982	Lipids and lipid-like molecules	Fatty Acyls	1.1617484142338663	0.021066819879081187	2.170924179600257	1.1183093401286193	up
MEDP0085	Tyramine	C8H11NO	121.084	137.0841	0.9775	1.8952	Benzene and substituted derivatives	Benzene and substituted derivatives	1.5383319063336045	0.0005535485772623508	2.1671532721278606	1.1158011917883215	up
MW0160402	(4S)-4-prop-1-en-2-ylcyclohexene-1-carbaldehyde	C10H14O	152.1151	150.1045	0.7881	4.0522	Lipids and lipid-like molecules	Prenol lipids	1.2993006495282244	0.0026904230504234705	2.1617416670111727	1.1121941280725722	up
MW0137277	Aflatoxin B1	C17H12O6	313.0788	312.0634	0.593	4.3445	Phenylpropanoids and polyketides	Coumarins and derivatives	1.4347479914666623	0.003770796527976386	2.1572988513314155	1.109226047369321	up
MW0151771	Iridotrial;(1S,2R,3S)-2-Formyl-alpha-(hydroxymethylene)-3-methylcyclopentaneacetaldehyde	C10H14O3	184.1052	182.0943	0.9771	7.1029	Lipids and lipid-like molecules	Prenol lipids	1.3082655570601107	0.0041166358440207	2.155363352131608	1.1079311000013408	up
MW0129180	{3-[(2E)-3-phenylprop-2-enoyl]phenyl}oxidanesulfonic acid	C15H12O5S	346.0729	304.0405	0.5246	4.0167	Phenylpropanoids and polyketides	Linear 1,3-diarylpropanoids	1.4948476185069808	0.0016699202774426033	2.1548214082664394	1.1075683036135744	up
MW0149739	Gln Leu Glu Lys	C22H40N6O8	517.2979	516.2908	0.6687	2.6427	--	--	1.5619762378984767	8.822183355026808e-05	2.151133847183836	1.1050972944777142	up
MW0011438	(6E)-8-Methyl-6-nonenoic acid	C10H18O2	171.1381	170.1307	0.6941	7.5739	Lipids and lipid-like molecules	Fatty Acyls	1.279003982693206	0.003186822611579135	2.1471355271053416	1.1024132569218423	up
MW0103397	5-Fluorouridine	C9H11FN2O6	261.0502	262.0601	0.5994	2.9178	Nucleosides, nucleotides, and analogues	Pyrimidine nucleosides	1.5482080977124086	0.0001550040790448769	2.1438038540182056	1.100172913360837	up
MEDP0646	2,3-Dihydrobenzofuran	C8H8O	103.0541	120.0575	0.8283	1.8952	Heterocyclic compounds	Heterocyclic compounds	1.5671245218945755	0.000250093269728386	2.1430700964716984	1.0996790390850244	up
MW0140651	(S)-2-Phenyloxirane;(S)-Styrene oxide	C8H8O	104.0575	120.0575	0.9675	1.8952	Benzenoids	Benzene and substituted derivatives	1.4784975007973429	0.0010983054087703539	2.1360150912613443	1.094921839914507	up
MEDN1452	11β-Prostaglandin E2	C20H32O5	705.4517	352.225	0.7206	7.5742	Oxidized lipid	Oxidized lipid	1.1489052440777523	0.02206575787146179	2.135549380317696	1.0946072578095098	up
MEDP1667	Phe -Glu	C14H18N2O5	295.1293	294.1216	0.7344	2.6277	Amino acid and Its metabolomics	Small Peptide	1.2738650683925836	0.012514240572651072	2.1352805329551603	1.0944256234362966	up
MEDL02152	Cyclic Amp	C10H12N5O6P	330.0602	329.0525	0.8005	1.643	Nucleotides and derivatives	Nucleotides and derivatives	1.4093759572892033	0.004347940901710061	2.1290368325673965	1.090200908786297	up
MW0110624	1-O-Hexadecyl-2-deoxy-2-thio-R-(heptanoyl)-sn-glyceryl-3-phosphocholine	C31H64NO6PS	632.4148	609.4192	0.6981	9.9711	Organic nitrogen compounds	Organonitrogen compounds	1.1954374929286786	0.022793597621808225	2.1271499165475336	1.08892171465162	up
MW0155209	Phe His His	C21H25N7O4	440.2067	439.1968	0.7532	4.2113	--	--	1.1977852734698484	0.016451724103981404	2.1270973505315767	1.0888860624077408	up
MW0066699	TG(14:0/16:1(9Z)/18:1(11Z))	C51H94O6	917.5952	1282.894	0.7732	9.1022	Lipids and lipid-like molecules	Glycerolipids	1.0699664609203574	0.02442702372178856	2.125085780059286	1.0875210774707642	up
MW0014351	4,4-Dimethylcholest-8(9),24-dien-3β-ol	C29H48O	477.3972	412.3705	0.7235	9.0286	Lipids and lipid-like molecules	Prenol lipids	1.4313567675838008	0.002209054256760063	2.1164169981259904	1.0816239099933986	up
MW0052317	D-Gal alpha 1->6D-Gal alpha 1->6D-Glucose	C18H32O16	539.1369	504.169	0.7988	0.8164	Organic oxygen compounds	Organooxygen compounds	1.567857823761416	2.985766096152349e-05	2.110835530302514	1.0778141727823016	up
MW0141244	1113,14-dihydro-15-keto PGF2	C20H34O5	707.4728	354.2406	0.7852	8.0756	Lipids and lipid-like molecules	Fatty Acyls	1.1234366293914722	0.02117370397932101	2.104265439171712	1.0733167025496575	up
MW0054426	Lucidenic acid D1	C27H34O7	963.4555	1419.0192	0.5388	4.1059	Lipids and lipid-like molecules	Prenol lipids	1.3815408259909685	0.0014158457592971555	2.1034373866516454	1.072748873817844	up
MW0109144	Phe Val Arg	C20H32N6O4	421.2483	420.2485	0.7909999999999999	8.6287	--	--	1.2332701004791848	0.010729210257310329	2.0976260115139524	1.0687574808560916	up
MW0052318	D-Glucosyl-β1-1'-D-erythro-sphingosine	C24H47NO7	444.3316	461.3353	0.5546	8.8365	Lipids and lipid-like molecules	Sphingolipids	1.4840824494703315	0.0013614203171509133	2.0957980305569923	1.0674996928518108	up
MW0052341	Diethyl sebacate	C14H26O4	539.3573	258.1831	0.5918	9.1021	Lipids and lipid-like molecules	Fatty Acyls	1.124746606616247	0.03014617788352785	2.0932010268878383	1.0657108718264106	up
MW0111826	1-Kestose	C18H32O16	527.1572	504.169	0.7943	0.9638	Organic oxygen compounds	Organooxygen compounds	1.5231167765017568	0.00033132997772924864	2.09070755074351	1.0639912711099289	up
MW0012096	11-Dehydrothromboxane B2	C20H32O6	735.432	368.2199	0.779	7.7606	Lipids and lipid-like molecules	Fatty Acyls	1.1384932456678158	0.022341683283235537	2.084501632787254	1.0597025022077804	up
MW0007244	Ginkgolic acid I	C22H34O3	347.2619	346.2508	0.5955	7.3676	Benzenoids	Benzene and substituted derivatives	1.1247320923905546	0.027094599642672672	2.079901829494141	1.0565154353642747	up
MEDP1093	Allopurinol	C5H4N4O	119.0351	136.0385	0.654	1.7983	Nucleotide And Its metabolomics	Nucleotide and Its metabolomics	1.6164956455032693	2.3980752435054225e-06	2.078264666334137	1.055379392689466	up
MW0126258	Propylpyrazole Triol	C24H22N2O3	387.1533	386.163	0.7009	3.8575	Organoheterocyclic compounds	Azoles	1.0399255537410552	0.042678333244531325	2.074565926666831	1.0528095046735413	up
MW0013121	2,3-Dinorfluprostenol	C21H25F3O6	429.1418	430.1603	0.6813	7.3857	Lipids and lipid-like molecules	Fatty Acyls	1.2067207629505932	0.006615416625004574	2.071012374637597	1.0503361739229622	up
MW0007329	Homovanillin	C9H10O3	206.081	166.063	0.8292	3.6474	Benzenoids	Phenols	1.1942355173105303	0.01998015398143288	2.0688080839557634	1.0487998176641806	up
MW0012522	16,16-Dimethylprostaglandin A1	C22H36O4	365.2694	364.2614	0.5864	9.3954	Lipids and lipid-like molecules	Fatty Acyls	1.1997955451547802	0.019636494404563002	2.063976320344944	1.0454264190572482	up
MW0154302	Narbonolide	C20H32O5	353.2327	352.225	0.9916	9.1021	Phenylpropanoids and polyketides	Macrolides and analogues	1.1271212954414704	0.030373096180118082	2.05894178947808	1.041903042588702	up
MW0107880	L-Homophenylalanine	C10H13NO2	381.1758	179.0946	0.5839	4.3562	--	--	1.0687698693560814	0.04693801932437693	2.05600573748165	1.0398442905166032	up
MW0114649	Isomaltose	C12H22O11	325.1131	342.1162	0.6844	1.6067	Organic oxygen compounds	Organooxygen compounds	1.0472017745308149	0.034654276578440016	2.054815002355645	1.039008512058693	up
MW0115202	Pullulan	C18H32O16	528.1608	504.169	0.8801	0.9709	Organic oxygen compounds	Organooxygen compounds	1.0847734476155284	0.02456475590266208	2.0527133409326983	1.037532170802491	up
MW0007086	Ethylhexyl salicylate	C15H22O3	249.1489	250.1569	0.7113	0.1686	Benzenoids	Benzene and substituted derivatives	1.2148091561412024	0.006761044033951624	2.051775849392497	1.0368731292717537	up
MEDP0507	2-Hydroxycinnamic acid	C9H8O3	165.0545	164.0473	0.8623	1.1543	Benzene and substituted derivatives	Phenolic acids	1.3857574184073411	0.005053679228611185	2.0514555134256103	1.0366478691921135	up
MW0165746	(1S,3S,4S,6S,7R,8R,10Z,12S)-1,4,8-trimethyl-12-propan-2-yltricyclo[9.3.0.03,7]tetradec-10-ene-6,8-diol	C20H34O2	354.2719	306.2559	0.9649	8.7179	Organic oxygen compounds	Organooxygen compounds	1.1209414730365486	0.017836576277026634	2.0514182436409985	1.036621658815378	up
MW0161552	(2R,3R,4S,5S,6R)-2-[(2R,3S,4S,5R)-3,4-dihydroxy-2,5-bis(hydroxymethyl)oxolan-2-yl]oxy-6-[[(2R,3S,4S,5R)-3,4-dihydroxy-2,5-bis(hydroxymethyl)oxolan-2-yl]oxymethyl]oxane-3,4,5-triol	C18H32O16	541.1345	504.169	0.941	0.8168	Organic oxygen compounds	Organooxygen compounds	1.5539890476907925	5.941986231512269e-06	2.048448080119813	1.0345313267928662	up
MEDP1217	3-methyl-4-pentenoic acid	C6H10O2	227.128	114.0681	0.6695	6.6649	Organic acid And Its derivatives	Organicacid and Its derivatives	1.4573943064276436	0.0006077171111316695	2.0484391252015537	1.034525019947929	up
MEDN0798	PGK1	C20H32O5	353.2326	352.225	0.5786	9.2937	Oxidized lipids	Oxidized lipids	1.1027367236785242	0.0334113159671944	2.0470161742468003	1.033522501683972	up
MW0150925	His Glu Phe Glu	C25H32N6O9	561.23	560.2231	0.5943	2.999	--	--	1.2592210780656834	0.013520277210180131	2.0424681689730737	1.0303135947369155	up
MW0142902	3-Deoxy-D-manno-octulosonate 8-phosphate;2-Dehydro-3-deoxy-D-octonate 8-phosphate	C8H15O11P	336.0745	318.0352	0.6157	1.6587	Organic oxygen compounds	Organooxygen compounds	1.1720660026045593	0.01674219349393864	2.0368864727450244	1.026365572953769	up
MW0145546	Arg Tyr Leu Lys	C27H46N8O6	579.3492	578.354	0.5028	8.2042	--	--	1.076185492598434	0.03608931487060479	2.0351804473811104	1.0251567153763113	up
MW0054415	L-Propionylcarnitine	C10H19NO4	435.2699	217.1314	0.5804	4.3726	Lipids and lipid-like molecules	Fatty Acyls	1.5840807753639308	1.8010560719256401e-06	2.0328797028631804	1.023524845178879	up
MW0055876	PA(20:0/16:1(9Z))	C39H75O8P	787.4897	702.52	0.9774	7.1693	Lipids and lipid-like molecules	Glycerophospholipids	1.0599948218966329	0.03776060811996815	2.031200818084087	1.0223328811563557	up
MW0141334	12-Ethyl-8-isobutylbacteriochlorophyllide d	C36H40MgN4O4	615.2695	616.29	0.5725	4.0977	Organoheterocyclic compounds	Tetrapyrroles and derivatives	1.4464945520880559	0.0013402040472355393	2.0298780273812422	1.0213930404257332	up
MW0055311	Nicotinuric acid	C8H8N2O3	361.1137	180.0535	0.6076	2.6575	Organic acids and derivatives	Carboxylic acids and derivatives	1.4802000394281765	0.0012265045392804773	2.027009722378056	1.0193530085842732	up
MW0062269	Prostaglandin G2	C20H32O6	388.2599	368.2199	0.9853	7.7791	Lipids and lipid-like molecules	Fatty Acyls	1.2231854380243437	0.015058063037649056	2.025941022420057	1.0185921761624552	up
MW0142228	2-Amino-5-formylamino-6-(5-phospho-D-ribosylamino)pyrimidin-4(3H)-one	C10H16N5O9P	380.0596	381.0686	0.5262	1.4796	--	--	1.535950743366462	0.00013282631155100668	2.020354860569464	1.0146087140763331	up
MW0141420	15(S)-15-methyl PGF2 isopropyl ester	C24H42O5	411.3102	410.3032	0.6546	9.5728	--	--	1.2765843305153557	0.010532926061736813	2.009566229468104	1.0068841252198328	up
MW0141322	12alpha-Fluoro-11beta,17beta-dihydroxyandrosta-1,4-dien-3-one	C19H25FO3	319.1747	320.1788	0.6458	4.4430000000000005	Lipids and lipid-like molecules	Steroids and steroid derivatives	1.053610600968404	0.04509520293575599	2.0061618876676492	1.0044380292360748	up
MW0156574	Scorpioidin	C16H20O4	277.141	276.1362	0.6057	5.4856	Lipids and lipid-like molecules	Prenol lipids	1.4840731647132082	0.0006030917465691622	0.4998403816190897	-1.0004606348228453	down
MW0141837	1-Stearoyl-2-Arachidonoyl PC-d8	C46H76D8NO8P	932.5267	817.6437	0.5513	7.7203	--	--	1.3866824878006545	0.0016334805475817936	0.4993957323703223	-1.001744602244544	down
MW0111333	Triethanolamine	C6H15NO3	299.2219	149.1052	0.7103	6.8149	Organic nitrogen compounds	Organonitrogen compounds	1.337232050872667	0.00342575996050273	0.4971296483757535	-1.008305947975468	down
MW0109297	Prehumulinic acid	C16H24O4	281.1728	1465.0974	0.5309	7.4262	--	--	1.4222994598630077	0.0008942320239781373	0.4970975882841118	-1.0083989909610804	down
MW0159231	Val Val Ala	C13H25N3O4	351.1995	287.1845	0.5463	3.8719	--	--	1.3529686883046683	0.003587548946364931	0.4970967129006573	-1.0084015315336168	down
MEDN1013	2'-Deoxyadenosine-5'-Monophosphate	C10H14N5O6P	332.0754	331.0682	0.7976	1.2718	Nucleotide And Its metabolomics	Nucleotide and Its metabolomics	1.5224771762332878	0.00045949507647200216	0.4969243041508789	-1.0089019902694756	down
MW0103626	NAD+; Nicotinamide-Adenine-Dinucleotide	[C21H28N7O14P2]+	711.1277	664.1164	0.9611	1.1521	Nucleosides, nucleotides, and analogues	(5'->5')-dinucleotides	1.5364501605990963	7.048547237035944e-05	0.4967801592268126	-1.0093205395992664	down
MEDP0224	D-Fructose	C6H12O6	359.1181	180.0634	0.7866	0.7416	Carboxylic acids and derivatives	Sugars	1.2964492287055074	0.004170516910882843	0.4965553558056102	-1.009973537064015	down
MW0106007	Benazeprilat	C22H24N2O5	397.1783	396.1685	0.7729	0.6145	Organic acids and derivatives	Carboxylic acids and derivatives	1.64860720641873	3.5991902144922685e-06	0.492609758823588	-1.021482886321827	down
MW0054023	Inositol	C6H12O6	399.1091	180.0634	0.5837	0.9956	Organic oxygen compounds	Organooxygen compounds	1.4313751780161554	0.0005391093210077422	0.4917387359331882	-1.0240360892558529	down
MW0125196	MK 571(sodium salt)	C26H27ClN2O3S2	578.1289	514.1152	0.5236	3.458	--	--	1.2915645354743803	0.005301180595293861	0.4912326788837682	-1.0255215567864473	down
MW0012826	1-Hexanol	C6H14O	227.1915	102.1045	0.5153	7.188	Lipids and lipid-like molecules	Fatty Acyls	1.391614601365276	0.002042576861007778	0.4895279663993443	-1.0305368125188097	down
MW0156585	Se-Adenosylselenomethionine	C15H23N6O5Se	428.0812	447.0895	0.5795	1.5645	--	--	1.059207411307327	0.03560257321969832	0.489475713689601	-1.0306908154645071	down
MW0166803	[(2R,3S,4S,5R,6R)-6-[(2S,3S,4S,5R)-3,4-dihydroxy-2,5-bis(hydroxymethyl)oxolan-2-yl]oxy-4-hydroxy-2-(hydroxymethyl)-5-(3-methylbutanoyloxy)oxan-3-yl] 3-methylbutanoate	C22H38O13	528.2657	510.2312	0.9946	3.548	--	--	1.4422998778271583	0.0010602019907806372	0.4878443820557269	-1.0355070803796862	down
MW0140361	(3R)-3,8-Dihydroxy-9-[(2R,4R,5R,6R)-5-hydroxy-4-[(2S,5S,6S)-5-hydroxy-6-methyloxan-2-yl]oxy-6-methyloxan-2-yl]-3-methyl-2,4-dihydrobenzo[a]anthracene-1,7,12-trione	C31H34O10	549.2148	566.2152	0.6346	2.6427	Phenylpropanoids and polyketides	Angucyclines	1.3835911602144235	0.0072650204363694185	0.4875920533664	-1.0362534813621929	down
MW0144016	8,12-Diethyl-3-vinylbacteriochlorophyllide d	C34H34MgN4O3	569.2444	570.2481	0.5660000000000001	3.5275	--	--	1.3816022444788378	0.0009875023965377335	0.4874612414636136	-1.0366405816070146	down
MW0123340	Ciprofloxacin	C17H18FN3O3	354.1222	331.1332	0.627	2.7169	--	--	1.4139760211328951	0.0012186779605869072	0.4871707442486776	-1.037500596279085	down
MW0131105	3-(3,4-dihydroxyphenyl)-1-[2,4,6-trihydroxy-3,5-bis(3-methylbut-2-en-1-yl)phenyl]propan-1-one	C25H30O6	468.2454	426.2042	0.5215	5.6491	Phenylpropanoids and polyketides	Linear 1,3-diarylpropanoids	1.3962554233017543	0.002640087896903235	0.4832580202221945	-1.0491344190700516	down
MW0126194	Pizotifen	C19H21NS	296.1529	295.1395	0.5256	2.4937	Organoheterocyclic compounds	Cycloheptathiophenes	1.53479541322256	6.836113218200496e-05	0.4813861169571284	-1.0547335594021563	down
MW0014128	3-hydroxy-tetradecanoic acid	C14H28O3	489.4147	244.2038	0.8249	7.4264	Lipids and lipid-like molecules	Fatty Acyls	1.5339726076096485	0.00017039338346784062	0.4797300014954605	-1.0597054288412504	down
MW0143626	5-Hydroxy-1-(4-hydroxyphenyl)-3-decanone	C16H24O3	529.347	264.1725	0.5877	7.1903	Lipids and lipid-like molecules	Fatty Acyls	1.4012674655635786	0.0013531363340660775	0.4773584525425706	-1.0668550896725475	down
MEDP0430	2-Aminoadipic Acid	C6H11NO4	144.0654	161.0688	0.7597	1.4891	Organic acid And Its derivatives	Organicacid and Its derivatives	1.4802670885413869	0.00017233497577702324	0.4766557816880078	-1.0689802989287558	down
MW0124398	Indacaterol	C24H28N2O3	373.1932	392.21	0.6768	0.6263	Organoheterocyclic compounds	Quinolines and derivatives	1.5320519822198158	5.661043462593482e-06	0.4758528503917129	-1.0714125819227454	down
MW0160244	1,3,3-trimethyl-2-oxabicyclo[2.2.2]octan-5-ol	C10H18O2	234.1489	170.1307	0.8473	5.1891	Organoheterocyclic compounds	Oxanes	1.056810129486052	0.04646533392922949	0.4758320910781895	-1.0714755215729854	down
MW0152980	Lys Gly Tyr	C17H26N4O5	733.3847	366.1903	0.5629	3.127	--	--	1.6282691613107818	4.35381020168495e-06	0.4750631669400612	-1.0738087402389396	down
MEDP1307	(2S, 3S) -3-methylphenylalanine	C10H13NO2	180.1016	179.0946	0.6817	2.4486	Amino acid and Its metabolomics	Amino acid derivatives	1.5882575279575355	3.1991524743347216e-06	0.4745931335793802	-1.0752368671381345	down
MEDP0366	N,N-Dimethylformamide	C3H7NO	56.0497	73.053	0.8611	8.4086	Alcohol and amines	Amines	1.4144453113007232	0.003255026114733736	0.4745604041696745	-1.0753363632790949	down
MW0013656	2-Propyl-2-pentenoic acid	C8H14O2	184.1332	142.0994	0.5471	4.419	Lipids and lipid-like molecules	Fatty Acyls	1.1547473763829434	0.026241158998902274	0.4716447681178512	-1.0842274306912778	down
MW0109880	Thr Leu Lys	C16H32N4O5	361.2425	360.2373	0.6861	2.5356	--	--	1.5202628139474783	4.8931761015103713e-05	0.4712661309515808	-1.0853860937038176	down
MW0110898	Albendazole oxide	C12H15N3O4S	563.1649	297.0783	0.7074	3.4581	Organoheterocyclic compounds	Benzimidazoles	1.3265976322231499	0.0033220979935483226	0.470270477572491	-1.088437328706013	down
MEDL00729	Pyrrole-2-Carboxylic Acid	C5H5NO2	110.0241	111.032	0.8943	2.8572	Organic acids	Organic acids	1.3146093937470014	0.0016690331489109052	0.4660257001848958	-1.101518576688252	down
MW0141025	1-(4-Hydroxyphenyl)-1-decene-3,5-dione	C16H20O3	278.1754	260.1412	0.9229	6.3476	Benzenoids	Benzene and substituted derivatives	1.5030915593797571	0.0004639671567955145	0.465945134771106	-1.101768007934106	down
MW0150384	Gly Ile Gln	C13H24N4O5	380.1915	316.1747	0.5381	4.0637	--	--	1.475946613890856	0.0001267092439132862	0.4644339700221046	-1.1064545960041259	down
MW0063836	Tetranor-PGFM	C16H26O7	329.1591	330.1678	0.5047	0.6654	Lipids and lipid-like molecules	Fatty Acyls	1.5317036343852737	1.8840154413608639e-06	0.4633203933453717	-1.1099179099676677	down
MW0139604	Rotenonic acid	C23H24O6	395.1479	396.1573	0.5807	2.638	Phenylpropanoids and polyketides	Isoflavonoids	1.3612929243272758	0.0044370601155658005	0.4631238565766897	-1.1105300193866794	down
MW0123810	Eletriptan	C22H26N2O2S	383.1743	382.1715	0.5699	4.5818	Organoheterocyclic compounds	Indoles and derivatives	1.5937912537648002	9.754077794746678e-06	0.4629725384299053	-1.1110014734233913	down
MW0006877	Dinorcapsaicin	C16H23NO3	276.1594	1264.847	0.5614	6.3347	Benzenoids	Phenols	1.4130055385326996	0.0011063974703198114	0.4618675376179879	-1.1144489450272077	down
MEDP1594	METHACHOLINE	C8H17NO2	177.1669	159.1259	0.5327	4.7169	Tryptamines,Cholines,Pigments	Cholines	1.5270057980880642	2.9622910400316558e-05	0.4617446713055607	-1.114832782787177	down
MW0012348	13S-Hydroxy-9Z,11E,15Z-octadecatrienoic acid	C18H30O3	295.2269	294.2195	0.5746	9.1322	Lipids and lipid-like molecules	Fatty Acyls	1.325290875932569	0.002295140513796495	0.4604920976580712	-1.1187516959373809	down
MW0052920	Flumethasone pivalate	C27H36F2O6	495.2563	494.24800000000016	0.5841	2.7596	Lipids and lipid-like molecules	Steroids and steroid derivatives	1.518038183776834	0.0009656011267882763	0.4593527553678034	-1.1223256123586842	down
MW0158665	Tyr Val Glu Asp	C23H32N4O10	542.2442	524.2118	0.5797	3.4523	--	--	1.3656631779672106	0.0029233865576653553	0.4590036791740492	-1.1234223771853546	down
MW0151607	Ile Thr Tyr Asp	C23H34N4O9	528.265	510.2326	0.5775	3.9563	--	--	1.470354264820492	0.00043052974056266335	0.4575119482845469	-1.1281186738824365	down
MW0140366	(3R)-9-[(2R,4R,5R,6R)-4-[(2S,5S,6S)-5-[(2S,4R,5S,6R)-4,5-Dihydroxy-6-methyloxan-2-yl]oxy-6-methyloxan-2-yl]oxy-5-hydroxy-6-methyloxan-2-yl]-3,5,8-trihydroxy-3-methyl-2,4-dihydrobenzo[a]anthracene-1,7,12-trione	C37H44O14	695.2726	712.2731	0.5826	3.241	Phenylpropanoids and polyketides	Angucyclines	1.5167582248263305	0.0008822937269413023	0.4559532768480173	-1.1330421010089091	down
MW0015136	7,8-Dihydro-α-ionone	C13H22O	242.1833	194.1671	0.9731	7.4558	Lipids and lipid-like molecules	Prenol lipids	1.1536713440065924	0.037828669432592964	0.4558551213579435	-1.1333527110879364	down
MW0159921	[(2R,3S,4R,5R)-5-(2-amino-6-oxo-3H-purin-9-yl)-3,4-dihydroxyoxolan-2-yl]methyl dihydrogen phosphate	C10H14N5O8P	365.069	363.05800000000005	0.9668	0.8504	--	--	1.5131555172553426	0.0005830917303639705	0.4546280750433091	-1.1372413159777557	down
MW0103376	3'-O-Methylguanosine	C11H15N5O5	364.0655	126.1045	0.8131	1.9753	Nucleosides, nucleotides, and analogues	Purine nucleosides	1.403762029581579	0.0013611711347885135	0.4540610177485211	-1.1390419117145711	down
MW0154334	N-Cyclopropylammelide;2,4-Dihydroxy-6-(cyclopropylamino)-1,3,5-triazine	C6H8N4O2	151.0614	168.0647	0.9098	1.8815	Organoheterocyclic compounds	Triazines	1.4811501711782014	0.00019412940900074148	0.4452089212790871	-1.1674455926024982	down
MW0007327	Homosalate	C16H22O3	280.1903	262.1569	0.5792	6.3625	Benzenoids	Benzene and substituted derivatives	1.5314321964492772	0.00017015128049730966	0.444503942865592	-1.1697318786952915	down
MW0002672	2-Amino-5-benzoylbenzimidazole	C14H11N3O	255.1227	1395.0192	0.5165	5.6294	Benzenoids	Benzene and substituted derivatives	1.4478831446135347	0.0006038401318922371	0.4437848315256612	-1.1720677375297446	down
MW0108473	N-(N-(3-Carboxyoxirane-2-carbonyl)leucyl)isoamylamine	C15H26N2O5	315.188	314.1842	0.6238	0.6291	Organic acids and derivatives	Carboxylic acids and derivatives	1.6601824478149665	2.766854366599727e-07	0.4435198860776709	-1.1729293028695844	down
MW0000081	3-Epicorynantheine	C22H26N2O3	731.3707	366.1943	0.6472	3.1212	Alkaloids and derivatives	Corynanthean-type alkaloids	1.5847339643427825	1.4877471850238968e-06	0.44152666774394655	-1.1794275171267743	down
MW0155154	Phe Gln Ala Arg	C23H36N8O6	521.2813	520.2758	0.634	3.52	--	--	1.4595459433387457	0.0014665834135904113	0.4385944436033469	-1.1890405597492564	down
MEDN0017	D-Pyroglutamic acid	C5H7NO3	281.0787	129.0426	0.6205	0.8729	Amino acid and Its metabolomics	Amino acid derivatives	1.0414672290663176	0.02383146254694176	0.4367426584357864	-1.1951446429812855	down
MW0169345	kaempferol	C15H10O6	287.0457	286.0477	0.9863	5.689	--	--	1.2629166522205442	0.002827677281051801	0.43654576082356267	-1.1957952028816958	down
MEDP1623	16α-Hydroxy Estrone	C18H22O3	326.1172	286.1569	0.6423	3.9311	Hormones and hormone related compunds	Hormones and hormone related compunds	1.1210933246066337	0.027588294469664786	0.4345482113603393	-1.2024118478086758	down
MW0054667	Malonyl-L-carnitine	C10H17NO6	294.1185	247.1056	0.5574	1.1535	--	--	1.3334894217235425	0.0060792856115069425	0.431928527754268	-1.2111354889457409	down
MW0052891	Fasciculol C	C30H52O6	509.4018	1362.9566	0.5954	11.1085	--	--	1.4401699288962204	0.000522540798315218	0.43139379664962696	-1.2129226638854396	down
MW0126735	Tetrahydro-L-biopterin	C9H15N5O3	500.2698	241.1175	0.5672	3.2853	Organoheterocyclic compounds	Pteridines and derivatives	1.6139581345929972	6.71676506695425e-06	0.4298103030127555	-1.2182280287637022	down
MW0115072	Ovalicin	C16H24O5	297.1666	1334.9253	0.627	5.605	Organic oxygen compounds	Organooxygen compounds	1.3502727260367031	0.0028201271315218732	0.4296365663028342	-1.2188113087829489	down
MW0106227	Cyclohexylacetic acid	C8H14O2	285.206	142.0994	0.7989	6.3034	Organic acids and derivatives	Carboxylic acids and derivatives	1.520023144954747	4.563360516141666e-05	0.4282740234980912	-1.2233939201263009	down
MW0110396	Valganciclovir	C14H22N6O5	355.1728	354.1652	0.6841	6.1392	Organic acids and derivatives	Carboxylic acids and derivatives	1.628493555295373	1.5373577383921405e-05	0.42825066102827614	-1.2234726216978082	down
MEDP1049	2-Phenoxyethanol	C8H10O2	294.1694	138.0681	0.5774	6.1845	Alcohol and amines	Alcohols	1.5817771596788952	3.056933846628723e-05	0.4279963447060817	-1.2243296195154445	down
MW0009548	Propanoic acid, 2-[[4-[2-[[[(2,4-difluorophenyl)amino]carbonyl]heptylamino]ethyl]phenyl]thio]-2-methyl-	C26H34F2N2O3S	515.2111	492.2258	0.7167	4.4781	Benzenoids	Benzene and substituted derivatives	1.1408278663460074	0.024313905523063263	0.4276072296058235	-1.2256418498076842	down
MW0137493	Benzoic acid eugenyl ester	C17H16O3	537.2352	268.1099	0.5519	4.7911	Phenylpropanoids and polyketides	Depsides and depsidones	1.026711006047033	0.04322174418597765	0.4272665275817713	-1.2267917953813134	down
MW0146115	Asp Gly Lys Ala Asp	C19H32N6O10	505.2249	504.218	0.7926	3.2866	--	--	1.5968262988888782	1.978317416567529e-05	0.4258600140543555	-1.2315488198797755	down
MEDP0232	N-Acetyl-D-Glucosamine	C8H15NO6	204.0867	221.0899	0.5795	6.1107	Carboxylic acids and derivatives	Sugar derivatives	1.4714209625810672	0.00034314608572468376	0.4206679126789887	-1.2492463171523531	down
MW0159003	Val Glu Tyr His Gln	C30H42N8O10	692.3326	674.3024	0.5742	3.4496	--	--	1.4647156324553534	0.0010443004187324374	0.4201421463950659	-1.251050578414833	down
MW0142724	3,6,8-Trimethylallantoin	C7H12N4O3	277.0115	200.0909	0.8969	2.9189	Organoheterocyclic compounds	Azolidines	1.589913552452482	2.1025556214441282e-05	0.4200257926995962	-1.2514501720977276	down
MEDN0602	deoxyguanosine 5'-monophosphate(dGMP)	C10H14N5O7P	693.118	347.0631	0.8114	1.1476	Nucleotide And Its metabolomics	Nucleotide and Its metabolomics	1.5248114978391505	8.593435367859362e-05	0.419762907213543	-1.252353407874723	down
MEDN0163	Hypoxanthine	C5H4N4O	137.0456	136.039	0.8111	1.8924	Nucleotide And Its metabolomics	Nucleotide and Its metabolomics	1.2700860931783184	0.0069833189612116256	0.4180121126536441	-1.2583833472889576	down
MW0157780	Thr Pro Gly	C11H19N3O5	274.1416	273.1325	0.7506	5.2626	--	--	1.3917417253320072	0.0030939833181151065	0.41704252034087225	-1.261733611079312	down
MEDL01917	cis-3-Hexenyl acetate	C8H14O2	283.1904	142.0994	0.6973	6.3047	Lipids	Free fatty acids	1.45472504272104	7.881006605999649e-05	0.41641297729087395	-1.2639130647191723	down
MW0136950	7-Chloro-3,4',5,6,8-pentamethoxyflavone	C20H19ClO7	407.0859	1366.9879	0.5278	0.6737	Phenylpropanoids and polyketides	Flavonoids	1.64896168479475	3.3836849084758475e-09	0.4146551953540923	-1.2700159264295248	down
MW0016211	Bixin	C25H30O4	393.2114	394.2144	0.7089	4.1426	Lipids and lipid-like molecules	Prenol lipids	1.6109992955693735	2.934306330500791e-09	0.4123310499433237	-1.2781249896822933	down
MEDL02411	5-Hydroxy-L-Tryptophan	C11H12N2O3	219.0767	220.0848	0.852	1.9921	Amino acids and derivatives	Amino acids and derivatives	1.3259184580095762	0.005953455488338853	0.4115144322067462	-1.2809850666511866	down
MEDL00422	PC(18:3/18:3)	C44H76NO8P	778.5376	777.5308	0.7387	10.6353	-	-	1.0431845700230418	0.04630873901476655	0.4052393307255748	-1.3031538923942203	down
MEDN0153	Adenosine 5'-Monophosphate	C10H14N5O7P	693.1181	347.06300000000016	0.9831	0.845	Nucleotide And Its metabolomics	Nucleotide and Its metabolomics	1.5255930982630317	7.845869807156909e-06	0.4049141457244478	-1.3043120502675851	down
MEDP0251	Trigonelline	C7H7NO2	138.0546	137.0477	0.8945	0.7795	CoEnzyme and vitamins	CoEnzyme and vitamins	1.6191207661917664	2.515244042694701e-06	0.4048688725899893	-1.304473365892042	down
MEDP0461	2-Methylguanosine	C11H15N5O5	321.0995	297.1073	0.9835	1.9093	Nucleotide And Its metabolomics	Nucleotide and Its metabolomics	1.5066873343491858	0.0001388297264660707	0.4039481709888584	-1.3077578965986292	down
MW0008605	N-[(4-Hydroxy-3-methoxyphenyl)methyl]octanamide	C16H25NO3	278.1749	1268.8783	0.5599	6.3497	Benzenoids	Phenols	1.4492921074546083	0.0005380914386416803	0.4016977724303194	-1.315817633784396	down
MW0005125	4-Hydroxypropranolol	C16H21NO3	276.1595	275.1521	0.6174	6.1842	Benzenoids	Naphthalenes	1.5905736606378782	1.160493537909142e-05	0.4015652508873935	-1.3162936626042838	down
MW0156827	Ser Leu Ser Gly Leu	C20H37N5O8	951.546	475.2642	0.7240000000000001	7.6462	--	--	1.3099103034918471	0.004059394660808438	0.401449307985864	-1.3167102683765628	down
MW0016243	Bullatetrocin	C37H66O8	639.5015	1479.1131	0.5088	10.4368	--	--	1.0039701203632363	0.03675563443732058	0.3998888104782484	-1.3223291820648844	down
MW0052393	Diisobutyl adipate	C14H26O4	259.1906	258.1831	0.528	7.4265	Lipids and lipid-like molecules	Fatty Acyls	1.5048265290496805	0.00018070658044886312	0.39802413542033577	-1.3290721792051308	down
MW0076204	TG(18:1(9Z)/18:2(9Z,12Z)/18:3(9Z,12Z,15Z))	C57H98O6	995.6003	708.6268	0.7303	7.6621	Lipids and lipid-like molecules	Glycerolipids	1.363726231554282	0.0017112063146997587	0.3977859736978638	-1.329935688583212	down
MW0002692	2-Amino-5-nitrobenzophenone	C13H10N2O3	243.074	242.0691	0.6022	2.0021	Benzenoids	Benzene and substituted derivatives	1.2727507526213508	0.012634196035562952	0.3924348284669393	-1.3494750089194745	down
MW0108589	N5-(1-Iminoethyl)-L-ornithine	C7H15N3O2	369.2354	173.1164	0.5789	4.7169	Organic acids and derivatives	Carboxylic acids and derivatives	1.2344101521972508	0.007320553367886123	0.39105794508697217	-1.3545456998974323	down
MW0010901	(1S,2S,4R,8R)-p-Menthane-1,2,8,9-tetrol	C10H20O4	203.128	1437.0661	0.7428	4.2771	Lipids and lipid-like molecules	Prenol lipids	1.1663000577876024	0.010604912358346569	0.38996176716231457	-1.3585954094488106	down
MW0140479	(7S,8S)-DiHODE;(9Z,12Z)-(7S,8S)-Dihydroxyoctadeca-9,12-dienoic acid;(7S,8S,9Z,12Z)-7,8-Dihydroxyoctadeca-9,12-dienoate	C18H32O4	335.2198	312.2301	0.9964	7.309	Lipids and lipid-like molecules	Fatty Acyls	1.5934867476373706	4.450900379565296e-05	0.38947423233473455	-1.360400212332418	down
MW0145330	Arg Gln Phe	C20H31N7O5	450.2525	449.2387	0.536	4.5972	--	--	1.5902262959805065	1.4959842614797535e-05	0.3848026089644155	-1.3778095142636475	down
MW0014489	4-Hydroxyacid;4-Hydroxyalkanoic acid;4-Hydroxycarboxylic acid	C4H8O3	146.08100000000005	104.0473	0.7962	1.3593	Lipids and lipid-like molecules	Fatty Acyls	1.3467605101717401	0.0038971740084381436	0.379242536926008	-1.3988073047796632	down
MW0150468	Gly Pro Leu	C13H23N3O4	327.1997	285.1689	0.5931	3.1854	--	--	1.6219123822805406	2.0212902541215194e-05	0.3788888634661727	-1.4001533589949322	down
MW0157598	Thr Cys Asp	C11H19N3O7S1	338.1001	337.0944	0.6029	4.4027	--	--	1.6172809702170317	1.93883734312355e-05	0.3748094135616168	-1.4157709072901716	down
MEDP1228	Heterodendrin	C11H19NO6	308.134	261.1212	0.6704	1.3608	Others	Others	1.377468447458646	0.003860470102932364	0.3740024565440755	-1.4188803487522144	down
MW0139615	Rutacultin	C16H18O4	316.152	274.1205	0.65	6.1836	Phenylpropanoids and polyketides	Coumarins and derivatives	1.6171820425198058	1.4668318034539897e-06	0.37088242102808056	-1.4309662058456616	down
MW0072324	TG(16:1(9Z)/16:1(9Z)/22:4(7Z,10Z,13Z,16Z))	C57H98O6	993.593	764.6894	0.6832	7.6625	Lipids and lipid-like molecules	Glycerolipids	1.4206024879347041	0.0007196728109448536	0.370282374356555	-1.4333022168160712	down
MW0056858	PC(15:0/18:4(6Z,9Z,12Z,15Z))	C41H74NO8P	723.5225	552.4331	0.7587	11.4317	Lipids and lipid-like molecules	Glycerophospholipids	1.3048539440405444	0.009666962426158112	0.37015900267269614	-1.4337829779503302	down
MW0050174	DG(18:2(9Z,12Z)/18:3(9Z,12Z,15Z)/0:0)	C39H66O5	632.5239	154.1358	0.7049	7.8961	Lipids and lipid-like molecules	Fatty Acyls	1.096326158900122	0.046744553549166463	0.3694658837139073	-1.4364869420697552	down
MW0000265	Galantamine	C17H21NO3	364.0654	287.1521	0.5885	1.6512	Alkaloids and derivatives	Amaryllidaceae alkaloids	1.3982753096279503	0.0026244145555800328	0.36866964578303596	-1.439599457086022	down
MW0110471	Virginiamycin S1	C43H49N7O10	824.3583	823.3541	0.5905	2.7743	Organic acids and derivatives	Peptidomimetics	1.4340079340820504	0.0017410269723983948	0.3686341959402085	-1.4397381877140012	down
MW0146347	Asp-Gly-OH	C11H10N2O8	297.0370000000001	298.0437	0.5485	2.9253	--	--	1.539767552637319	2.972302495280752e-05	0.3641468377295293	-1.4574077781251686	down
MEDP0525	N-Acetyl-L-alanine	C5H9NO3	132.0655	131.0582	0.6743	1.1475	Amino acid and Its metabolomics	Amino acid derivatives	1.38612900566711	0.004006295415978017	0.3613169274123021	-1.4686632494119969	down
MW0054697	Medicagenic acid	C30H46O6	485.3229	502.3294	0.6459	11.0953	Lipids and lipid-like molecules	Prenol lipids	1.459187882442177	0.0011121282718093914	0.3564507603060603	-1.4882252966714382	down
MW0157921	Thymopentin	C30H49N9O9	680.3759	679.3653	0.6575	6.9494	Organic acids and derivatives	Carboxylic acids and derivatives	1.6056767602184532	6.452364562110898e-06	0.3529502893161986	-1.502463091014751	down
MEDN0685	Undecanedioic acid	C11H20O4	215.1183	216.1362	0.8488	5.3889	FA	FFA	1.454287919539055	0.00016597976151464308	0.3527844929067209	-1.503140948102644	down
MEDP1180	LPC(14:0/0:0)	C22H46NO7P	490.2875	467.3012	0.7449	7.5077	GL	MG	1.3799288799382412	0.003906008570149958	0.3499819249282018	-1.5146476799435111	down
MW0000185	Codeine	C18H21NO3	300.1572	299.1521	0.8006	6.3549	Alkaloids and derivatives	Morphinans	1.5784676707574594	0.00013172113236388004	0.34694404427169845	-1.5272250936437064	down
MW0124102	Fenazaquin	C20H22N2O	307.1882	306.1732	0.6896	6.3034	Organoheterocyclic compounds	Diazanaphthalenes	1.5600178133618892	1.060343352530811e-05	0.34492106175005544	-1.535661868800613	down
MW0062133	Polyporusterone F	C28H46O5	480.3676	1465.0974	0.7304	11.1104	--	--	1.3683918183323645	0.006369011504690221	0.3414621327206105	-1.5502024987008134	down
MW0054599	LysoPE(15:0/0:0)	C20H42NO7P	440.2782	439.2699	0.6399	6.5386	Lipids and lipid-like molecules	Glycerophospholipids	1.3541824212327258	0.006662140428183735	0.34092496822184226	-1.5524738333069794	down
MW0139445	Psoromic acid	C18H14O8	376.1032	358.0689	0.6032	2.7128	Phenylpropanoids and polyketides	Depsides and depsidones	1.4837308013028376	0.0004093744649599982	0.3371294583804284	-1.5686253993288086	down
MW0133166	3-methoxy-5-[7-methoxy-3-methyl-5-(prop-1-en-1-yl)-2,3-dihydro-1-benzofuran-2-yl]benzene-1,2-diol	C20H22O5	341.1255	342.1467	0.6939	3.9926	--	--	1.498839662100301	0.0005431705194405981	0.3292341092589765	-1.6028142855263627	down
MW0138770	Licochalcone A	C21H22O4	694.3368	338.1518	0.5646	3.4523	Phenylpropanoids and polyketides	Linear 1,3-diarylpropanoids	1.4541040984317413	0.000868319054710716	0.32502203913999433	-1.621390546961823	down
MW0048956	Clobetasol propionate	C25H32ClFO5	530.2149	466.1922	0.5003	3.5481	Lipids and lipid-like molecules	Steroids and steroid derivatives	1.4506090682682096	0.0011154091456727843	0.32205614137811944	-1.6346158915542788	down
MW0148995	Erythronolide B	C21H38O7	447.2316	402.2618	0.8647	4.5682	Phenylpropanoids and polyketides	Macrolides and analogues	1.6401829673771149	1.1838599586556065e-05	0.3184900085935561	-1.6506799807374242	down
MW0158403	Tyr Asn Val	C18H26N4O6	395.1752	394.1852	0.626	4.5962	--	--	1.2331961218016438	0.010452443559415716	0.3123033967504158	-1.6789798340516746	down
MW0117880	2,4,6-Triethyl-1,3,5-trioxane	C9H18O3	173.1177	1395.0192	0.7755	4.5066	Organoheterocyclic compounds	Trioxanes	1.535592328578154	0.0006076952373449573	0.3115832155514573	-1.6823105748795346	down
MW0137405	Aromadendrin	C15H12O6	330.0983	288.0634	0.6463	4.9091	Phenylpropanoids and polyketides	Flavonoids	1.402728073857721	0.00282121629592608	0.30669005217921697	-1.7051467228845318	down
MEDN0455	Guanine	C5H5N5O	152.0566	151.049	0.8416	1.8856	Nucleotide And Its metabolomics	Nucleotide and Its metabolomics	1.4247876944948623	0.0012482965442882374	0.30600028717334105	-1.7083950880368843	down
MEDN0220	D-Glucose	C6H12O6	179.0553	180.063	0.8137	1.856	Carboxylic acids and derivatives	Sugars	1.2712676954904507	0.012070171851195943	0.30416682000847983	-1.7170653094120598	down
MEDN0768	13-oxoODE	C18H30O3	293.2111	294.2195	0.7955	9.0988	Oxidized lipids	Oxidized lipids	1.3711066824477416	0.0005527684593518633	0.3012736721594751	-1.7308534913361813	down
MEDN1422	8(S)-HETrE	C20H34O3	369.2623	322.2508	0.5195	7.4924	Oxidized lipid	Oxidized lipid	1.5000719322596916	0.00014641607357325663	0.2964455035321284	-1.754161180706778	down
MW0016312	Calusterone	C21H32O2	317.2437	316.2402	0.5882	2.1287	Lipids and lipid-like molecules	Steroids and steroid derivatives	1.6362095691466187	4.2678267272361734e-05	0.29343013132157475	-1.7689110709236826	down
MW0012140	11-Keto-β-boswellic acid	C30H46O4	471.3421	470.3396	0.5263	3.7834	Lipids and lipid-like molecules	Prenol lipids	1.6319220463859072	2.44476348099206e-05	0.2904859061337617	-1.7834599265903819	down
MW0010793	(+)-α-Tocopherol	C29H50O2	545.2624	430.3811	0.5635	3.6926	Lipids and lipid-like molecules	Prenol lipids	1.401680234155022	0.0029242652950656122	0.2835465049890248	-1.8183427212198315	down
MW0155602	Plakortic acid	C17H30O4	297.2059	298.2144	0.5666	6.7174	Organoheterocyclic compounds	Dioxanes	1.1187862821561656	0.0271007607895565	0.28265942342263256	-1.8228632998983567	down
MW0154261	Nalmefene	C21H25NO3	340.1963	339.1834	0.5355	4.0163	Benzenoids	Phenanthrenes and derivatives	1.6302194859289203	1.9128458315807597e-06	0.2753119764342708	-1.8608607244507671	down
MW0009676	Rhododendrol	C10H14O2	184.1329	166.0994	0.6322	3.8328	Benzenoids	Phenols	1.2654627943889356	0.00817269921842657	0.2664210798464561	-1.9082198586238783	down
MW0000520	(+)-Norpseudoephedrine	C9H13NO	134.0963	151.0997	0.6414	2.4626	Benzenoids	Benzene and substituted derivatives	1.5349427907421007	0.000133298602953144	0.2608418123683307	-1.938752945941844	down
MEDL02637	Pseudoephedrine	C10H15NO	166.1226	165.1154	0.7092	3.828	Alkaloids	Amphetamine alkaloids	1.3312217901372123	0.0033595303815745483	0.2397607614952624	-2.0603325238257475	down
MW0138816	Lunarine	C25H31N3O4	438.2386	437.2315	0.7266	3.2209	Phenylpropanoids and polyketides	Macrolactams	1.6263647950602182	7.526845852060053e-07	0.2347181989833614	-2.0909983886668884	down
MW0143978	7-keto DHEA	C19H26O3	303.1921	302.1882	0.5967	3.2148	Lipids and lipid-like molecules	Steroids and steroid derivatives	1.4743644699561855	0.0006718264637216527	0.2277830317329296	-2.1342678146829943	down
MW0121335	5-Chloro-1-(4-piperidinyl)-1,3-dihydro-2H-benzimidazol-2-one	C12H14ClN3O	315.0929	251.0825	0.6014	8.3937	Organoheterocyclic compounds	Benzimidazoles	1.2474244321425767	0.005395772392942778	0.22216097023153256	-2.1703227120005546	down
MW0130099	2-(3,4,5-trihydroxyphenyl)-3,4-dihydro-2H-1-benzopyran-3,4,5,7-tetrol	C15H14O8	323.0741	322.0689	0.6353	2.0918	Phenylpropanoids and polyketides	Flavonoids	1.258048125320762	0.02188478657198684	0.21918532290188533	-2.189776899169193	down
MW0107961	L-Thyronine	C15H15NO4	545.1992	273.1001	0.5797	3.9474	Organic acids and derivatives	Carboxylic acids and derivatives	1.5351690104629714	2.98849715595286e-05	0.2124266833831216	-2.234963097264035	down
MW0015566	Acoric acid	C15H24O4	315.1887	268.1675	0.5398	3.8619	Lipids and lipid-like molecules	Prenol lipids	1.4684014116897277	0.0009495898726215463	0.20723777469704968	-2.2706410976496127	down
MW0133677	4'-Hydroxyanigorootin	C38H22O7	591.1466	1433.0348	0.5626	0.6713	Phenylpropanoids and polyketides	Isoflavonoids	1.647244817665995	6.970469810144765e-09	0.19860739209275394	-2.3320087744526443	down
MW0139992	α-Methyl-DL-phenylalanine	C10H13NO2	197.1284	179.0946	0.6858	2.4626	Phenylpropanoids and polyketides	Phenylpropanoic acids	1.4930760062500743	0.0005493112600396425	0.19027756128091936	-2.3938226548594224	down
MW0150993	His Leu Ile Arg	C24H43N9O5	538.3497	537.3387	0.5924	7.4704	--	--	1.5305139825877494	0.00011063740254758225	0.18053612180788373	-2.4696405733462514	down
MW0123538	Demethoxyfumitremorgin C	C21H23N3O2	397.2032	1535.1757	0.6378	6.1172	--	--	1.5270699652377742	0.0007195480758421487	0.16823077020806246	-2.5714864893741214	down
MW0153012	Lys Ile His	C18H32N6O4	793.5463	396.2485	0.5819	7.4265	--	--	1.4406921158585	0.0003776387932179879	0.1675669951423255	-2.5771900785083623	down
MW0140674	(S)-Autumnaline;Autumnaline	C21H27NO5	438.2044	373.1889	0.8166	4.4184	Alkaloids and derivatives	Phenethylisoquinoline alkaloids	1.2985270447824522	0.016647955450846547	0.1581122136542269	-2.6609792793871536	down
MW0015228	7-Oxocallitrisic acid, methyl ester	C21H28O3	329.2071	328.2038	0.5769	4.0932	Lipids and lipid-like molecules	Prenol lipids	1.5536271817399474	4.359049345252049e-05	0.15745665611994245	-2.6669733494923977	down
MW0103580	Guanosine 5'-diphosphoglucose	C16H25N5O16P2	606.0724	605.0772	0.6454	0.9396	Nucleosides, nucleotides, and analogues	Purine nucleotides	1.5934669847441831	0.00030835996071916	0.1479872546770132	-2.756455165020005	down
MW0144702	Ala Phe Tyr Arg	C27H37N7O6	556.2959	555.2805	0.5501	4.44	--	--	1.2671362971072169	0.019893240020589027	0.14744609673438808	-2.7617404637150926	down
MW0009299	Oxeladin	C20H33NO3	318.2424	335.246	0.5465	8.3787	Benzenoids	Benzene and substituted derivatives	1.5426376845869452	0.0005002560941388355	0.14432206871083164	-2.792636171459509	down
MW0056909	PC(16:0/5:0(CHO))	C29H56NO9P	594.3753	593.3693	0.6094	9.1795	Lipids and lipid-like molecules	Glycerophospholipids	1.5409170128665433	0.0009305837909043184	0.14384649324489107	-2.797398044056059	down
MEDN1545	Guanosine-5'-monophosphate	C10H14N5O8P	725.1079	363.05800000000005	0.9869	0.8469	Nucleotide And Its metabolomics	Nucleotide and Its metabolomics	1.4497385484094505	0.0021701681496439024	0.13654323861057838	-2.8725702188251763	down
MEDP0150	2'-Deoxyinosine	C10H12N4O4	253.0821	252.0859	0.8267	1.7101	Nucleotide And Its metabolomics	Nucleotide and Its metabolomics	1.5283768013594976	0.0003638699663671848	0.13297592044684226	-2.9107630716953588	down
MEDP1687	Juvenile Hormone III	C16H26O4	330.2042	283.191	0.9746	7.4546	Hormones and hormone related compunds	Hormones and hormone related compunds	1.5121975812138302	0.0016527292907534414	0.1291413030040796	-2.952977606176838	down
MW0153754	Met-Enkephalin	C27H35N5O7S	572.2182	573.2257	0.6079	3.9477	Organic acids and derivatives	Carboxylic acids and derivatives	1.5156282197785225	0.00011349642138167898	0.12899129566194956	-2.9546543790762536	down
MW0149131	Fasoracetam;NS 105	C10H16N2O2	195.113	196.1212	0.6467	2.456	Organic acids and derivatives	Carboxylic acids and derivatives	1.4766359053668063	0.0004057762807022127	0.10660570833701367	-3.2296434037976818	down
MW0104373	2,2'-(3-methylcyclohexane-1,1-diyl)diacetic acid	C11H18O4	232.1546	214.1205	0.5136	3.3688	Organic acids and derivatives	Carboxylic acids and derivatives	1.54649755036136	0.0006514510507024295	0.09833554832675397	-3.3461431442794614	down
MW0107441	Ile His	C12H20N4O3	251.1389	268.1535	0.7292	2.1675	--	--	1.5806361194578018	0.00022830920190685538	0.08593469242134813	-3.5406155149884646	down
MW0165720	(1R,2E,7S,8R)-9-hydroxy-1,8-dimethyl-12-propan-2-yltricyclo[9.3.0.03,7]tetradeca-2,11-diene-4-carbaldehyde	C20H30O2	320.2588	302.2246	0.8155	7.1318	Lipids and lipid-like molecules	Prenol lipids	1.6452122272517011	3.264529032407735e-07	0.07984229306121993	-3.646703034473492	down
MW0152862	Lys Arg Cys	C15H31N7O4S1	406.2204	405.2158	0.5767	5.5461	--	--	1.2835246054236098	0.012042942470366427	0.0794196803733294	-3.6543596350662164	down
MW0060173	PE-NMe2(14:0/20:4(5Z,8Z,11Z,14Z))	C41H74NO8P	741.5253	739.5152	0.9545	10.0094	Lipids and lipid-like molecules	Glycerophospholipids	1.5111040934392417	0.0017709510729981047	0.07870814981422762	-3.6673431628370636	down
MW0060322	PE-NMe2(18:0/22:1(13Z))	C47H92NO8P	876.6649	829.6561	0.7761	11.1378	Lipids and lipid-like molecules	Glycerophospholipids	1.1636707192667486	0.034146682975279	0.06855554357049448	-3.8665828591707134	down
MW0152705	-Linolenoyl Ethanolamide	C20H35NO2	344.2563	321.2668	0.9757	9.2782	Organic nitrogen compounds	Organonitrogen compounds	1.6263984808815193	8.822572348706274e-05	0.04380542079711151	-4.512746779464153	down
MW0000044	(S)-2-Propylpiperidine	C8H17N	174.1487	127.1361	0.6847	4.6119	Alkaloids and derivatives	--	1.5106965451079457	0.0018574051631917274	0.04220733596830708	-4.5663624172571975	down
MW0011900	1,2-Dioleoyl-rac-glycerol	C39H72O5	662.5713	620.538	0.5816	11.1838	Lipids and lipid-like molecules	Glycerolipids	1.2064867897718423	0.02472148726098693	0.019503167114146444	-5.680147767909635	down
MW0049898	DG(16:1n7/0:0/22:6n3)	C41H66O5	639.4947	750.6737	0.5135	11.127	Lipids and lipid-like molecules	Glycerolipids	1.1006870864420817	0.045175853945250616	0.00909824342819142	-6.7801962494668615	down
MW0157661	Thr His Gly	C12H19N5O5	358.1132	313.1386	0.5466	2.1707	--	--	1.1483189565394532	0.040421310702948784	0.0073342140746087735	-7.091141907913152	down
