# Supplementary material for: Royal jelly from different floral sources possesses distinct wound-healing mechanisms and ingredient profiles
Source: Royal Society of Chemistry journal article supplement (doi:10.1039/d1fo00586c), 2021-01-01
Supplement: d1fo00586c7.xlsx [file d1fo00586c7.xlsx]

## Sheet: Positive ion mode
Table S4: KEGG enrichment of the differential compounds in CmRJ-Zj and BnRJ-Zj detected in positive ion mode
Pathway	ID	Compound Index	p value
Purine metabolism	ko00230	MEDP0160;MW0168684;MEDP0150;MEDN0151;MEDN1013;MEDP0167;MEDN0163;MEDL02152;MEDN0455;MW0169241	0.0030415272202049
ABC transporters	ko02010	MW0123340;MEDP0232;MEDP0160;MEDP0150;MEDP0250;MEDP0167;MEDP0179;MW0114162;MW0054023;MW0115202;MW0169241	0.0176295500170003
Metabolism of xenobiotics by cytochrome P450	ko00980	MW0137277;MW0005845	0.0350254105919981
Parkinson disease	ko05012	MW0114347;MEDP0160;MEDL02152	0.0834104788356054
Renin secretion	ko04924	MEDP0160;MEDL02152	0.0921557469798351
Oxidative phosphorylation	ko00190	MEDP0208;MW0103626	0.0921557469798351
Drug metabolism - cytochrome P450	ko00982	MW0014136;MW0007107;MW0013656;MW0000341	0.0984375458088231
Nicotinate and nicotinamide metabolism	ko00760	MEDP0251;MEDP0208;MW0055311;MW0103626	0.0984375458088231
Ovarian steroidogenesis	ko04913	MW0014465;MW0053989;MEDL02152;MW0013517	0.13312496540811
Platelet activation	ko04611	MW0062269;MEDL02152	0.162009989021979
Longevity regulating pathway	ko04211	MEDL02152;MW0103626	0.162009989021979
cGMP-PKG signaling pathway	ko04022	MEDP0160;MEDL02152	0.162009989021979
Caffeine metabolism	ko00232	MEDL02259;MW0142724	0.162009989021979
Fluid shear stress and atherosclerosis	ko05418	MW0126735	0.188053097345133
Dilated cardiomyopathy	ko05414	MEDL02152	0.188053097345133
Human T-cell leukemia virus 1 infection	ko05166	MEDL02152	0.188053097345133
Human papillomavirus infection	ko05165	MEDL02152	0.188053097345133
Vibrio cholerae infection	ko05110	MEDL02152	0.188053097345133
Vasopressin-regulated water reabsorption	ko04962	MEDL02152	0.188053097345133
Endocrine and other factor-regulated calcium reabsorption	ko04961	MEDL02152	0.188053097345133
Growth hormone synthesis, secretion and action	ko04935	MEDL02152	0.188053097345133
Relaxin signaling pathway	ko04926	MEDL02152	0.188053097345133
Thyroid hormone signaling pathway	ko04919	MEDL02152	0.188053097345133
Insulin signaling pathway	ko04910	MEDL02152	0.188053097345133
Circadian rhythm	ko04710	MEDL02152	0.188053097345133
Leukocyte transendothelial migration	ko04670	MEDL02152	0.188053097345133
Apelin signaling pathway	ko04371	MEDL02152	0.188053097345133
Hedgehog signaling pathway	ko04340	MEDL02152	0.188053097345133
Adrenergic signaling in cardiomyocytes	ko04261	MEDL02152	0.188053097345133
Longevity regulating pathway - multiple species	ko04213	MEDL02152	0.188053097345133
Phosphatidylinositol signaling system	ko04070	MW0054023	0.188053097345133
Chemokine signaling pathway	ko04062	MEDL02152	0.188053097345133
Calcium signaling pathway	ko04020	MEDL02152	0.188053097345133
Rap1 signaling pathway	ko04015	MEDL02152	0.188053097345133
Ras signaling pathway	ko04014	MEDL02152	0.188053097345133
MAPK signaling pathway	ko04010	MEDL02152	0.188053097345133
Endocrine resistance	ko01522	MEDL02152	0.188053097345133
Inositol phosphate metabolism	ko00562	MW0054023	0.188053097345133
Penicillin and cephalosporin biosynthesis	ko00311	MEDP0430	0.188053097345133
cAMP signaling pathway	ko04024	MEDP0208;MEDP0160;MEDL02152	0.22931910219934
Alcoholism	ko05034	MEDP0160;MEDL02152	0.237893317430853
Morphine addiction	ko05032	MEDP0160;MEDL02152	0.237893317430853
Regulation of lipolysis in adipocytes	ko04923	MEDP0160;MEDL02152	0.237893317430853
Glucagon signaling pathway	ko04922	MEDP0208;MEDL02152	0.237893317430853
GABAergic synapse	ko04727	MEDP0208;MEDL02152	0.237893317430853
Vascular smooth muscle contraction	ko04270	MEDP0160;MEDL02152	0.237893317430853
alpha-Linolenic acid metabolism	ko00592	MW0054179;MW0012348	0.237893317430853
Vitamin digestion and absorption	ko04977	MEDP0250;MW0010793;MW0103626	0.285411197795281
Pyrimidine metabolism	ko00240	MEDP0179;MW0103647;MEDP0178	0.285411197795281
Chemical carcinogenesis	ko05204	MW0137277;MW0005845	0.315134736728482
Cushing syndrome	ko04934	MW0053989;MEDL02152	0.315134736728482
Cortisol synthesis and secretion	ko04927	MW0053989;MEDL02152	0.315134736728482
Folate biosynthesis	ko00790	MW0143248;MW0126735	0.315134736728482
Butanoate metabolism	ko00650	MW0014489;MEDP0208	0.315134736728482
Cysteine and methionine metabolism	ko00270	MW0103657;MW0168644	0.315134736728482
Hepatocellular carcinoma	ko05225	MW0137277	0.341080784098268
Chagas disease	ko05142	MEDL02152	0.341080784098268
Pertussis	ko05133	MEDL02152	0.341080784098268
Prion disease	ko05020	MEDL02152	0.341080784098268
Pancreatic secretion	ko04972	MEDL02152	0.341080784098268
Salivary secretion	ko04970	MEDL02152	0.341080784098268
Parathyroid hormone synthesis, secretion and action	ko04928	MEDL02152	0.341080784098268
Oxytocin signaling pathway	ko04921	MEDL02152	0.341080784098268
Thyroid hormone synthesis	ko04918	MEDL02152	0.341080784098268
Melanogenesis	ko04916	MEDL02152	0.341080784098268
Estrogen signaling pathway	ko04915	MEDL02152	0.341080784098268
Progesterone-mediated oocyte maturation	ko04914	MEDL02152	0.341080784098268
GnRH signaling pathway	ko04912	MEDL02152	0.341080784098268
Insulin secretion	ko04911	MEDL02152	0.341080784098268
Glutamatergic synapse	ko04724	MEDL02152	0.341080784098268
Long-term potentiation	ko04720	MEDL02152	0.341080784098268
Axon regeneration	ko04361	MEDL02152	0.341080784098268
Oocyte meiosis	ko04114	MEDL02152	0.341080784098268
Phospholipase D signaling pathway	ko04072	MEDL02152	0.341080784098268
Pyruvate metabolism	ko00620	MEDP0208	0.341080784098268
Phenylalanine metabolism	ko00360	MEDL02637;MEDP0507;MEDP0208;MW0000520	0.353334903359125
Galactose metabolism	ko00052	MW0114162;MW0054023	0.390575010822759
Metabolic pathways	ko01100	MEDN0010;MEDL02637;MW0062269;MW0103647;MW0168684;MW0006105;MEDP0507;MEDP0167;MW0157356;MW0142902;MW0154445;MW0168644;MW0103626;MW0107880;MW0151771;MW0014489;MW0114162;MEDP0085;MW0137405;MW0126847;MW0010793;MW0053989;MW0054023;MW0140651;MEDP1623;MEDP0430;MEDP0178;MEDN0017;MEDP0232;MW0054179;MEDP0208;MEDL02259;MW0143259;MW0006078;MW0103657;MEDP0150;MEDN1037;MW0006387;MW0151708;MW0126735;MEDN0455;MW…	0.425241771013206
Tyrosine metabolism	ko00350	MEDP0208;MEDP0085;MW0115251	0.454814667448286
Amoebiasis	ko05146	MEDL02152	0.465543302657483
Gastric acid secretion	ko04971	MEDL02152	0.465543302657483
Aldosterone-regulated sodium reabsorption	ko04960	MEDL02152	0.465543302657483
Olfactory transduction	ko04740	MEDL02152	0.465543302657483
Dopaminergic synapse	ko04728	MEDL02152	0.465543302657483
Cholinergic synapse	ko04725	MEDL02152	0.465543302657483
Thermogenesis	ko04714	MEDL02152	0.465543302657483
Circadian entrainment	ko04713	MEDL02152	0.465543302657483
Gap junction	ko04540	MEDL02152	0.465543302657483
Drug metabolism - other enzymes	ko00983	MW0103626	0.465543302657483
Porphyrin and chlorophyll metabolism	ko00860	MW0143132	0.465543302657483
Thiamine metabolism	ko00730	MW0103626	0.465543302657483
Aldosterone synthesis and secretion	ko04925	MEDL02152;MW0103626	0.528702214837899
Amphetamine addiction	ko05031	MEDL02152	0.566721073869319
Cocaine addiction	ko05030	MEDL02152	0.566721073869319
Longevity regulating pathway - worm	ko04212	MW0103626	0.566721073869319
AMPK signaling pathway	ko04152	MW0103626	0.566721073869319
Sphingolipid signaling pathway	ko04071	MEDP0160	0.566721073869319
Sulfur metabolism	ko00920	MEDP0208	0.566721073869319
Pantothenate and CoA biosynthesis	ko00770	MEDP0178	0.566721073869319
Riboflavin metabolism	ko00740	MEDP0250	0.566721073869319
Propanoate metabolism	ko00640	MEDP0208	0.566721073869319
Starch and sucrose metabolism	ko00500	MW0114649	0.566721073869319
Alanine, aspartate and glutamate metabolism	ko00250	MEDP0208	0.566721073869319
Citrate cycle (TCA cycle)	ko00020	MEDP0208	0.566721073869319
Carbon metabolism	ko01200	MW0014489;MEDP0208	0.589524969098556
Tryptophan metabolism	ko00380	MEDN0207;MEDN0848	0.64441528780035
Carbohydrate digestion and absorption	ko04973	MW0115202	0.648928012978934
Retrograde endocannabinoid signaling	ko04723	MEDL02152	0.648928012978934
beta-Alanine metabolism	ko00410	MEDP0178	0.648928012978934
Arginine biosynthesis	ko00220	MEDN0010	0.648928012978934
Taste transduction	ko04742	MEDP0215;MEDL02152	0.693430724319099
Ferroptosis	ko04216	MW0010793	0.715686668229026
Glutathione metabolism	ko00480	MEDN0017	0.715686668229026
Phenylalanine, tyrosine and tryptophan biosynthesis	ko00400	MW0107880	0.715686668229026
Lysine biosynthesis	ko00300	MEDP0430	0.715686668229026
Ascorbate and aldarate metabolism	ko00053	MW0054023	0.715686668229026
Serotonergic synapse	ko04726	MW0062269;MEDN0797;MEDL02152	0.72739499460373
Neuroactive ligand-receptor interaction	ko04080	MEDP0085;MEDP0160	0.736815461931977
Lysine degradation	ko00310	MEDP0208;MEDP0430	0.736815461931977
Bile secretion	ko04976	MEDP0215;MEDL02152;MW0000341	0.760827012492757
Inflammatory mediator regulation of TRP channels	ko04750	MEDL02152	0.769871944463406
Amino sugar and nucleotide sugar metabolism	ko00520	MEDP0232	0.769871944463406
Linoleic acid metabolism	ko00591	MW0015396;MW0140479	0.77492946452734
Biosynthesis of amino acids	ko01230	MEDN0010;MW0103657;MEDP0430	0.790922707608916
Glyoxylate and dicarboxylate metabolism	ko00630	MEDP0208	0.813828988779383
Glycerophospholipid metabolism	ko00564	MW0111333	0.813828988779383
Protein digestion and absorption	ko04974	MEDN1037;MEDP0085	0.837071323953514
Pathways in cancer	ko05200	MEDL02152	0.849469835522069
Insect hormone biosynthesis	ko00981	MW0140188	0.849469835522069
Central carbon metabolism in cancer	ko05230	MEDP0208	0.901746329523781
2-Oxocarboxylic acid metabolism	ko01210	MW0107880;MEDP0430	0.9174696665913
Steroid hormone biosynthesis	ko00140	MW0143788;MW0053989;MW0015173;MW0013517;MEDP1623	0.927247347375501
Ubiquinone and other terpenoid-quinone biosynthesis	ko00130	MW0010793	0.936006499305378
Arachidonic acid metabolism	ko00590	MW0062269;MEDN0797	0.992720396077844

## Sheet: Negative ion mode
Table S4: KEGG enrichment of the differential compounds in CmRJ-Zj and BnRJ-Zj detected in positive ion mode
Pathway	ID	Compound Index	p value
Taste transduction	ko04742	MEDN1545;MEDN0220;MEDN0153	0.0187684966926616
Olfactory transduction	ko04740	MEDN1545;MEDN0153	0.0315217391304348
FoxO signaling pathway	ko04068	MEDN0220;MEDN0153	0.0315217391304348
Linoleic acid metabolism	ko00591	MEDN0768;MW0144108;MW0054374	0.0722510950769572
Mineral absorption	ko04978	MEDL02347;MEDN0220	0.0838597210828548
AMPK signaling pathway	ko04152	MEDN0220;MEDN0153	0.0838597210828548
cGMP-PKG signaling pathway	ko04022	MEDN1545;MEDN0153	0.0838597210828548
Antifolate resistance	ko01523	MEDN1545;MEDN0153	0.0838597210828548
Porphyrin and chlorophyll metabolism	ko00860	MW0144016;MW0141334	0.0838597210828548
Phenylalanine, tyrosine and tryptophan biosynthesis	ko00400	MW0152130;MEDL02347	0.0838597210828548
Purine metabolism	ko00230	MEDP0167;MEDN1545;MEDN0153;MEDN0602	0.1475299650946
Staphylococcus aureus infection	ko05150	MW0108782	0.180124223602484
Toxoplasmosis	ko05145	MEDL02170	0.180124223602484
Cushing syndrome	ko04934	MEDN0153	0.180124223602484
AGE-RAGE signaling pathway in diabetic complications	ko04933	MEDN0220	0.180124223602484
Non-alcoholic fatty liver disease	ko04932	MEDN0220	0.180124223602484
Type II diabetes mellitus	ko04930	MEDN0220	0.180124223602484
Parathyroid hormone synthesis, secretion and action	ko04928	MEDN0153	0.180124223602484
Cortisol synthesis and secretion	ko04927	MEDN0153	0.180124223602484
Prolactin signaling pathway	ko04917	MEDN0220	0.180124223602484
Insulin secretion	ko04911	MEDN0220	0.180124223602484
Insulin signaling pathway	ko04910	MEDN0220	0.180124223602484
Phototransduction	ko04744	MEDN1545	0.180124223602484
Axon regeneration	ko04361	MEDL02411	0.180124223602484
Longevity regulating pathway	ko04211	MEDN0153	0.180124223602484
PI3K-Akt signaling pathway	ko04151	MEDN0153	0.180124223602484
HIF-1 signaling pathway	ko04066	MEDN0220	0.180124223602484
Riboflavin metabolism	ko00740	MW0142228	0.180124223602484
Glycolysis / Gluconeogenesis	ko00010	MEDN0220	0.180124223602484
ABC transporters	ko02010	MEDP0167;MEDL02347;MEDP0179;MEDN0220	0.186411536822371
Serotonergic synapse	ko04726	MW0062269;MEDL02411	0.22081386836668
Central carbon metabolism in cancer	ko05230	MEDL02347;MEDN0220	0.295095255011537
Morphine addiction	ko05032	MEDN0153	0.328726708074534
Carbohydrate digestion and absorption	ko04973	MEDN0220	0.328726708074534
Insulin resistance	ko04931	MEDN0220	0.328726708074534
Aldosterone synthesis and secretion	ko04925	MEDN0153	0.328726708074534
Renin secretion	ko04924	MEDN0153	0.328726708074534
Platelet activation	ko04611	MW0062269	0.328726708074534
mTOR signaling pathway	ko04150	MEDN0153	0.328726708074534
Neuroactive ligand-receptor interaction	ko04080	MEDL02170	0.328726708074534
Drug metabolism - other enzymes	ko00983	MW0103397	0.328726708074534
Starch and sucrose metabolism	ko00500	MEDN0220	0.328726708074534
Tryptophan metabolism	ko00380	MEDL02411;MEDL02773	0.439527896070207
Parkinson disease	ko05012	MEDN0153	0.451160201570375
Regulation of lipolysis in adipocytes	ko04923	MEDN0153	0.451160201570375
Glucagon signaling pathway	ko04922	MEDN0220	0.451160201570375
Folate biosynthesis	ko00790	MW0154127	0.451160201570375
Neomycin, kanamycin and gentamicin biosynthesis	ko00524	MEDN0220	0.451160201570375
Arginine and proline metabolism	ko00330	MEDL00729	0.451160201570375
Arachidonic acid metabolism	ko00590	MW0062269;MEDL02170	0.506184068368922
Galactose metabolism	ko00052	MW0052317;MEDN0220	0.506184068368922
Aminoacyl-tRNA biosynthesis	ko00970	MEDL02347	0.551896620269482
Pyrimidine metabolism	ko00240	MEDP0179	0.551896620269482
Pentose phosphate pathway	ko00030	MEDN0220	0.551896620269482
Biosynthesis of amino acids	ko01230	MW0152130;MEDL02347	0.567851990931467
Protein digestion and absorption	ko04974	MEDL02347	0.634667308245183
cAMP signaling pathway	ko04024	MEDN0153	0.634667308245183
Tyrosine metabolism	ko00350	MW0007329	0.634667308245183
alpha-Linolenic acid metabolism	ko00592	MEDL01917	0.758227719873425
Amino sugar and nucleotide sugar metabolism	ko00520	MEDN0220	0.758227719873425
Bile secretion	ko04976	MEDN0220	0.803756266131025
2-Oxocarboxylic acid metabolism	ko01210	MEDL02347	0.803756266131025
Phenylalanine metabolism	ko00360	MEDL02347	0.803756266131025
Biosynthesis of unsaturated fatty acids	ko01040	MW0054374	0.840952790851289
Metabolic pathways	ko01100	MEDN1545;MW0062269;MEDL02630;MEDL02773;MW0169345;MEDP0167;MW0052317;MEDL02411;MEDN0220;MW0152130;MW0139096;MW0154445;MEDN0153;MW0054374;MEDL02347;MEDP0179;MW0007329;MW0142228;MEDN0602	0.912256583104156
