# Supplementary material for: Royal jelly from different floral sources possesses distinct wound-healing mechanisms and ingredient profiles
Source: Royal Society of Chemistry journal article supplement (doi:10.1039/d1fo00586c), 2021-01-01
Supplement: d1fo00586c8.xlsx [file d1fo00586c8.xlsx]

## Sheet: Sheet1
Table S5: Comparison of proteins identified from RJ in the present and previous studies
Protein accession	Proteins	Schönleben et al., 2007	Li et al., 2007	Furusawa et al., 2008	Yu et al., 2010	Han et al., 2011	Toshiyuki et al. 2013	BnRJ-Zj	CmRJ-Zj
NP_001011608.1	alpha-glucosidase precursor	●		●		●	●	●	●
NP_001011616.2	defensin-1 preproprotein	●				●	●	●	●
NP_001107670.1	apolipophorin-III-like protein precursor	●		●		●	●	●	●
XP_397512.1	uncharacterized protein LOC408608	●		●		●	●	●	●
NP_001011579.1	major royal jelly protein 1 precursor	●	●	●	●	●	●	●	●
NP_001011580.1	major royal jelly protein 2 precursor	●	●	●	●	●	●	●	●
NP_001011601.1	major royal jelly protein 3 precursor	●	●		●	●		●	●
NP_001011610.1	major royal jelly protein 4 precursor	●	●	●	●	●	●	●	●
NP_001011599.1	major royal jelly protein 5 precursor		●	●	●			●	●
NP_001011622.1	major royal jelly protein 6 precursor	●				●	●	●	●
NP_001014429.1	major royal jelly protein 7 precursor	●		●		●	●	●	●
NP_001019868.1	major royal jelly protein 9 precursor	●					●	●	●
NP_001011574.1	glucose oxidase	●	●	●	●	●		●	●
NP_001012431.1	icarapin-like precursor	●		●		●	●	●	●
NP_001011598.1	alpha-amylase precursor					●		●	●
NP_001035313.1	odorant binding protein 14 precursor						●	●	●
XP_016771167.1	venom serine carboxypeptidase isoform X1							●	●
XP_016770320.2	esterase B1							●	●
XP_003250526.1	probable phospholipid hydroperoxide glutathione peroxidase							●	●
XP_001121077.2	chymotrypsin inhibitor							●	●
NP_001011572.1	transferrin 1 precursor							●	●
XP_006563421.1	chymotrypsin inhibitor-like							●	●
XP_026296064.1	lysosomal alpha-mannosidase isoform X2							●	●
XP_026299326.1	venom dipeptidyl peptidase 4 isoform X1							●	●
XP_392381.3	putative cysteine proteinase CG12163 isoform X2							●	●
XP_624076.1	ferritin heavy polypeptide-like 17							●	●
XP_006562399.1	membrane metallo-endopeptidase-like 1 isoform X3							●	●
XP_016770111.1	nucleobindin-2							●	●
XP_006560620.1	venom serine protease Bi-VSP							●	●
NP_001229473.1	peptidyl-prolyl cis-trans isomerase B precursor							●	●
XP_026299316.1	major royal jelly protein 5 isoform X1							●	●
XP_026300991.1	ferritin subunit							●	●
XP_623603.1	neutral alpha-glucosidase AB isoform X2							●	●
XP_016769185.2	phenoloxidase-activating factor 2 isoform X2							●	●
XP_016766389.1	uncharacterized protein LOC408666							●	●
XP_003251148.1	glucose dehydrogenase [FAD, quinone]							●	●
XP_006569953.1	elongation factor 1-alpha isoform X1							●	●
XP_006568873.1	endoplasmic reticulum resident protein 29							●	●
XP_016768886.2	xanthine dehydrogenase							●	●
XP_006570610.1	glucosylceramidase-like isoform X2							●	●
XP_006558902.1	carboxypeptidase Q							●	●
XP_026298263.1	superoxide dismutase [Cu-Zn], chloroplastic-like							●	●
XP_392857.2	lysosomal aspartic protease							●	●
XP_026299364.1	trichohyalin isoform X2							●	●
XP_393342.3	transcription factor SPT20 homolog							●	●
XP_006571730.2	uncharacterized protein LOC724993							●	●
XP_625189.3	laccase-5							●	●
XP_026297173.1	FK506-binding protein 2 isoform X2							●	●
XP_016769016.1	chitinase-like protein Idgf4 isoform X2							●	●
XP_001120999.2	chymotrypsin inhibitor							●	●
XP_026298038.1	uncharacterized protein LOC413627							●	●
XP_006563266.1	icarapin-like isoform X1							●	●
XP_006570321.2	alpha-N-acetylgalactosaminidase							●	●
NP_001153524.1	heat shock protein cognate 3 precursor							●	●
XP_026299317.1	major royal jelly protein 4 isoform X1							●	●
XP_026299638.1	lipase member H-A							●	●
XP_396873.2	acid phosphatase type 7							●	●
XP_006558237.1	renin receptor isoform X2							●	●
NP_001091693.1	yellow-y precursor							●	●
XP_026296936.1	carboxypeptidase D isoform X2							●	●
NP_001172074.1	actin related protein 1							●	●
XP_396350.2	peptidylglycine alpha-hydroxylating monooxygenase							●	●
NP_001091698.1	yellow-e3 precursor							●	●
XP_001120140.3	NPC intracellular cholesterol transporter 2 homolog a							●	●
XP_001122741.2	uncharacterized protein LOC727028							●	●
XP_006569959.1	venom acid phosphatase Acph-1							●	●
XP_391879.2	uncharacterized protein LOC408327							●	●
XP_026301350.1	uncharacterized protein LOC726323 isoform X3							●	●
XP_016767722.1	glucose dehydrogenase [FAD, quinone] isoform X2							●	●
XP_026299771.1	uncharacterized protein LOC102655185 isoform X4							●	●
XP_006567509.1	multiple coagulation factor deficiency protein 2 homolog							●	●
XP_026302107.1	uncharacterized protein LOC408570							●	●
XP_016770799.1	pancreatic triacylglycerol lipase isoform X1							●	●
NP_001011600.1	hexamerin 70b precursor							●	●
XP_026296056.1	venom serine protease 34 isoform X2							●	●
XP_393208.1	putative glucosylceramidase 4							●	●
NP_001071288.1	chemosensory protein 1 precursor							●	●
XP_026300272.1	protein CREG1							●	●
XP_006562720.1	prosaposin isoform X2							●	●
XP_623912.2	solute carrier family 23 member 1 isoform X2							●	●
XP_393146.1	uncharacterized protein LOC409648							●	●
XP_026300525.1	lysozyme-like							●	●
XP_001122458.2	venom acid phosphatase Acph-1							●	●
XP_026299315.1	major royal jelly protein 2 isoform X1							●	●
XP_393161.3	lysozyme							●	●
XP_026298978.1	serine protease inhibitor 88Ea isoform X2							●	●
XP_392764.1	prohormone-4							●	●
XP_026298883.1	protein disulfide-isomerase							●	●
XP_003250216.1	uncharacterized protein LOC100576814 isoform X2							●	●
XP_006557802.1	cathepsin L1							●	●
NP_001257753.1	cuticular protein 12 precursor							●	●
NP_001011615.1	hymenoptaecin preproprotein							●	●
XP_003250137.2	cell wall integrity and stress response component 1							●	●
XP_026297206.1	calcium/calmodulin-dependent 3',5'-cyclic nucleotide phosphodiesterase 1C isoform X2							●	●
XP_001121186.3	tRNA pseudouridine synthase-like 1 isoform X1							●	●
XP_001123067.2	beta-1,4-glucuronyltransferase 1							●	●
XP_026297846.1	putative mediator of RNA polymerase II transcription subunit 26 isoform X2							●	●
XP_026299498.1	cytohesin-1 isoform X5							●	●
XP_016767483.1	extracellular signal-regulated kinase 7 isoform X2							●	●
XP_016771725.1	allatostatin-A receptor isoform X2							●	●
XP_026295212.1	protein tramtrack, beta isoform isoform X3							●	●
XP_001122306.2	cleft lip and palate transmembrane protein 1-like protein							●	●
XP_016769181.1	serine protease 7							●	●
NP_001229363.1	tether containing UBX domain for GLUT4							●	●
XP_395961.4	translocation protein SEC63 homolog							●	●
XP_623060.3	histidine--tRNA ligase, cytoplasmic isoform X1							●	●
XP_026298870.1	serotonin receptor isoform X2							●	●
XP_006566804.2	rab GTPase-binding effector protein 1 isoform X2							●	●
XP_016766472.1	rab11 family-interacting protein 2 isoform X2							●	●
XP_026298058.1	patronin isoform X19							●	●
NP_001035349.1	alpha-glucosidase precursor							●	●
XP_006559588.1	putative uncharacterized protein DDB_G0282133 isoform X2							●	●
XP_006565216.2	probable serine/threonine-protein kinase DDB_G0282963 isoform X2							●	●
XP_006572370.2	gamma-tubulin complex component 6 isoform X2							●	●
XP_006561142.2	uncharacterized protein LOC100578420 isoform X2							●	●
XP_006561725.2	cardiomyopathy-associated protein 5 isoform X3							●	●
XP_624382.3	cleavage and polyadenylation specificity factor subunit 1							●	●
XP_016769131.1	myosin heavy chain, non-muscle isoform X6							●	●
XP_006563654.1	regulator of G-protein signaling loco isoform X4							●	●
XP_016769177.1	GIGYF family protein CG11148 isoform X3							●	●
XP_001119962.3	titin							●	●
XP_006568696.1	triple functional domain protein isoform X5							●	●
XP_006572338.2	protein purity of essence isoform X4							●	●
XP_013685095.1	nuclear cap-binding protein subunit 1							●	●
XP_013701329.1	F-box protein At1g47340-like							●	●
XP_013669639.1	vacuolar cation/proton exchanger 2-like							●	●
KAF3959057.1	hypothetical protein CMV_016094							●	●
KAF3952004.1	hypothetical protein CMV_022399							●	●
XP_013711346.1	alpha-ketoglutarate-dependent dioxygenase alkB							●	●
ABQ42296.1	glyceraldehyde 3-phosphate dehydrogenase, partial [Citrullus lanatus]							●	●
KAF3945849.1	hypothetical protein CMV_027816							●	●
KAF3946318.1	hypothetical protein CMV_027403							●	●
KAF3948057.1	hypothetical protein CMV_025896							●	●
KAF3948259.1	hypothetical protein CMV_025722							●	●
KAF3948475.1	hypothetical protein CMV_025532							●	●
KAF3975517.1	hypothetical protein CMV_001230							●	●
KAF3951371.1	hypothetical protein CMV_022969							●	●
KAF3951443.1	hypothetical protein CMV_022899							●	●
KAF3953649.1	hypothetical protein CMV_020929							●	●
KAF3954744.1	hypothetical protein CMV_019953							●	●
KAF3956721.1	hypothetical protein CMV_018181							●	●
KAF3957485.1	hypothetical protein CMV_017514							●	●
KAF3959195.1	hypothetical protein CMV_015971							●	●
KAF3960308.1	hypothetical protein CMV_014972							●	●
KAF3960592.1	hypothetical protein CMV_014709							●	●
KAF3963025.1	hypothetical protein CMV_012535							●	●
KAF3963230.1	hypothetical protein CMV_012357							●	●
KAF3964359.1	hypothetical protein CMV_011350							●	●
KAF3964712.1	hypothetical protein CMV_011038							●	●
KAF3965591.1	hypothetical protein CMV_010229							●	●
KAF3965900.1	hypothetical protein CMV_009951							●	●
KAF3966177.1	hypothetical protein CMV_009697							●	●
KAF3967373.1	hypothetical protein CMV_008625							●	●
KAF3967452.1	hypothetical protein CMV_008550							●	●
KAF3968574.1	hypothetical protein CMV_007550							●	●
KAF3969530.1	hypothetical protein CMV_006684							●	●
KAF3974395.1	hypothetical protein CMV_002272							●	●
XP_022572005.1	polygalacturonase-like							●	●
NP_001302511.1	probable galactinol--sucrose galactosyltransferase 4							●	●
XP_022555770.1	serine/threonine-protein kinase STY17							●	●
XP_013640104.1	protein LITTLE ZIPPER 3 isoform X2							●	●
XP_013640881.1	uncharacterized protein LOC106346172 isoform X1							●	●
XP_013692627.1	probable WRKY transcription factor 4							●	●
XP_022566256.1	LOW QUALITY PROTEIN: DEAD-box ATP-dependent RNA helicase 42-like							●	●
XP_013706971.1	probable folate-biopterin transporter 2							●	●
XP_013690114.2	glycine-rich cell wall structural protein-like							●	●
XP_013645397.1	uncharacterized protein LOC106349994 isoform X1							●	●
XP_013673168.1	probable mediator of RNA polymerase II transcription subunit 37c							●	●
XP_022574272.1	uncharacterized protein LOC106446841							●	●
XP_013705857.1	putative nucleobase-ascorbate transporter 9 isoform X2							●	●
XP_013647727.1	chloroplastic group IIB intron splicing facilitator CRS2-A, chloroplastic							●	●
XP_013688480.1	F-box protein PP2-A13-like							●	●
XP_013664522.1	cationic amino acid transporter 2, vacuolar							●	●
XP_013682090.1	berberine bridge enzyme-like 4							●	●
XP_013659036.1	LOW QUALITY PROTEIN: UDP-D-xylose:L-fucose alpha-1,3-D-xylosyltransferase MGP4							●	●
XP_013700387.1	probable inactive leucine-rich repeat receptor kinase XIAO, partial							●	●
XP_022556437.1	uncharacterized protein LOC106367568 isoform X3							●	●
XP_013664151.1	uncharacterized protein LOC106368682							●	●
XP_013667990.1	calcium-dependent protein kinase 7							●	●
XP_013668588.1	uncharacterized protein LOC106372868							●	●
XP_013668703.1	uncharacterized protein LOC106373010							●	●
XP_013668949.1	BAG family molecular chaperone regulator 1-like							●	●
XP_013673042.1	uncharacterized protein BNAC08G08060D isoform X1							●	●
XP_013676436.1	protein SODIUM POTASSIUM ROOT DEFECTIVE 3 isoform X1							●	●
XP_013677175.1	senescence-specific cysteine protease SAG12-like isoform X1							●	●
XP_013677788.1	PHD finger protein ALFIN-LIKE 7							●	●
XP_013678060.1	pentatricopeptide repeat-containing protein At3g53360, mitochondrial							●	●
XP_022555021.1	endoglucanase 19-like isoform X3							●	●
XP_013684326.1	uncharacterized protein LOC106388726							●	●
XP_013686259.1	wall-associated receptor kinase-like 21 isoform X2							●	●
XP_013687474.1	importin beta-like SAD2 isoform X1							●	●
XP_013688308.1	uncharacterized protein LOC106392079							●	●
XP_013688902.1	uncharacterized protein LOC106392642							●	●
XP_013689608.1	uncharacterized protein LOC106393455							●	●
XP_013689885.1	uncharacterized protein LOC106393761							●	●
XP_013694334.1	uncharacterized protein LOC106398301							●	●
XP_013706390.1	transcriptional corepressor SEUSS-like							●	●
XP_013701981.1	kinesin-like protein KIN-5D							●	●
XP_013716779.1	protein GRAVITROPIC IN THE LIGHT 1							●	●
XP_013741306.1	uncharacterized protein LOC106444374							●	●
XP_013707913.1	transcription factor MYB41							●	●
XP_013710703.1	putative FBD-associated F-box protein At5g56560							●	●
XP_013712307.2	uncharacterized protein LOC106416027							●	●
XP_013715551.1	putative nuclease HARBI1							●	●
XP_013717963.1	tetratricopeptide repeat protein SKI3 isoform X1							●	●
XP_013719975.1	uncharacterized protein LOC106423762							●	●
XP_022549488.1	uncharacterized protein BNAA10G22230D isoform X2							●	●
XP_013723908.1	trihelix transcription factor GT-3b-like							●	●
XP_013724126.1	DEAD-box ATP-dependent RNA helicase 57							●	●
XP_013724633.2	GDSL esterase/lipase At4g10955-like							●	●
XP_013730849.1	uncharacterized protein LOC106434521							●	●
XP_013733011.1	protein VERNALIZATION INSENSITIVE 3-like							●	●
XP_013738055.1	transcription factor bHLH118							●	●
XP_013741991.1	beta-amylase 3, chloroplastic							●	●
XP_022573846.1	RNA-binding protein 28-like isoform X2							●	●
XP_013744012.1	inactive protein RESTRICTED TEV MOVEMENT 2-like							●	●
XP_013748947.2	LOW QUALITY PROTEIN: sucrose synthase 5-like							●	●
XP_022575558.1	5'-3' exoribonuclease 4							●	●
XP_013752489.1	uncharacterized protein BNAA05G14630D							●	●
XP_022543508.1	laccase-15							●	●
XP_022565056.1	uncharacterized protein LOC106416918							●	●
XP_022553847.1	uncharacterized protein LOC111203956							●	●
XP_022559181.1	uncharacterized protein LOC106452510							●	●
XP_022563897.1	probable disease resistance protein At1g12280							●	●
XP_022564300.1	uncharacterized protein LOC111208921							●	●
XP_022565230.1	uncharacterized protein LOC106427832							●	●
XP_022565294.1	proline-rich receptor-like protein kinase PERK13							●	●
XP_022567235.1	uncharacterized protein LOC111210835							●	●
XP_016770898.2	polyubiquitin-A isoform X2								●
XP_006563422.1	chymotrypsin inhibitor								●
XP_006565048.1	glucose dehydrogenase [FAD, quinone] isoform X2								●
XP_016766413.1	uncharacterized protein LOC726803 isoform X2								●
XP_022550336.1	uncharacterized protein LOC106378802								●
