# Supplementary figures and images for: Royal jelly from different floral sources possesses distinct wound-healing mechanisms and ingredient profiles
Source: Royal Society of Chemistry journal article supplement (doi:10.1039/d1fo00586c), 2021-01-01

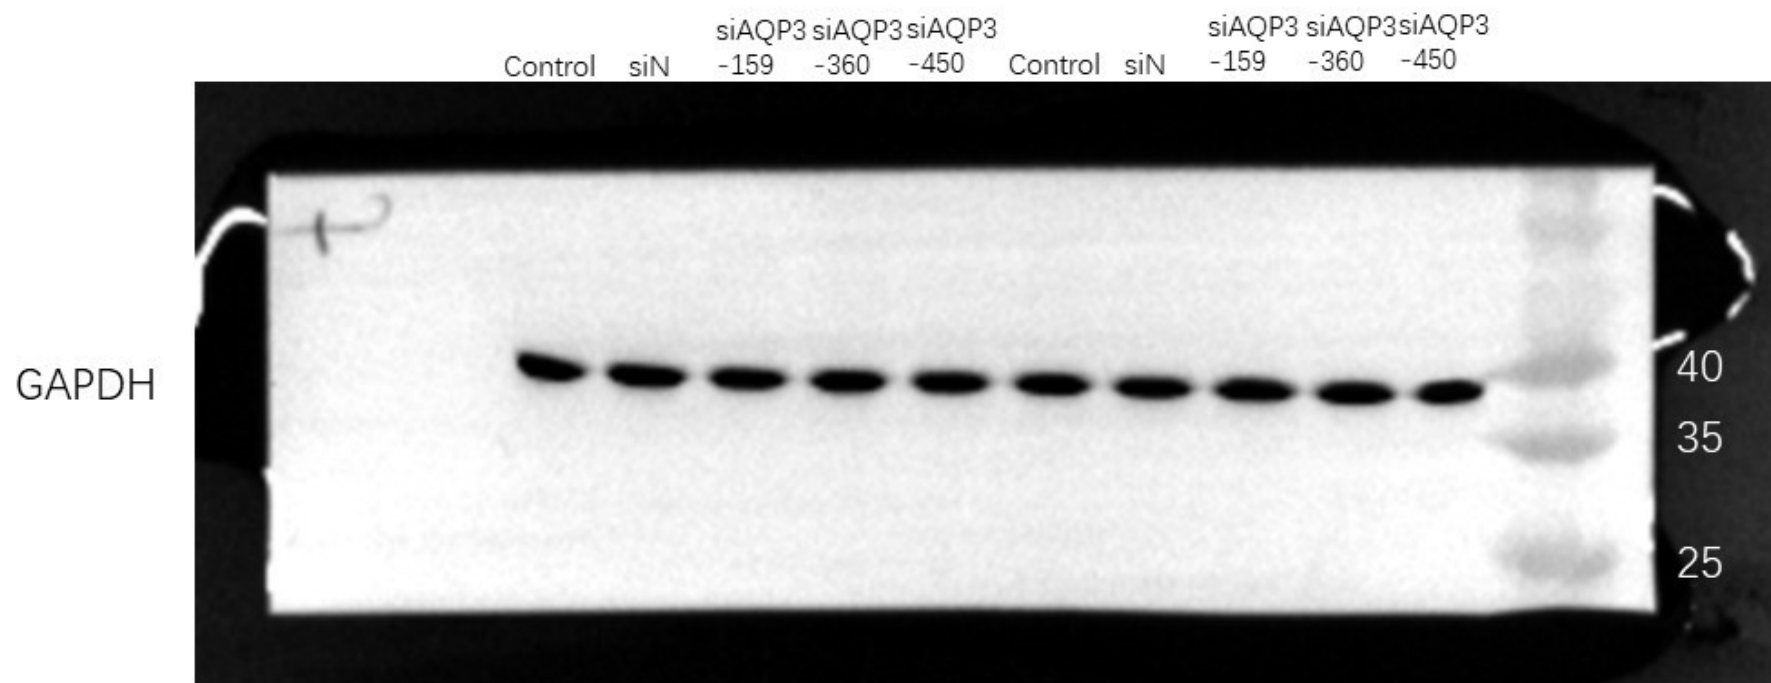

Supplement: d1fo00586c10.pdf [file d1fo00586c10.pdf]

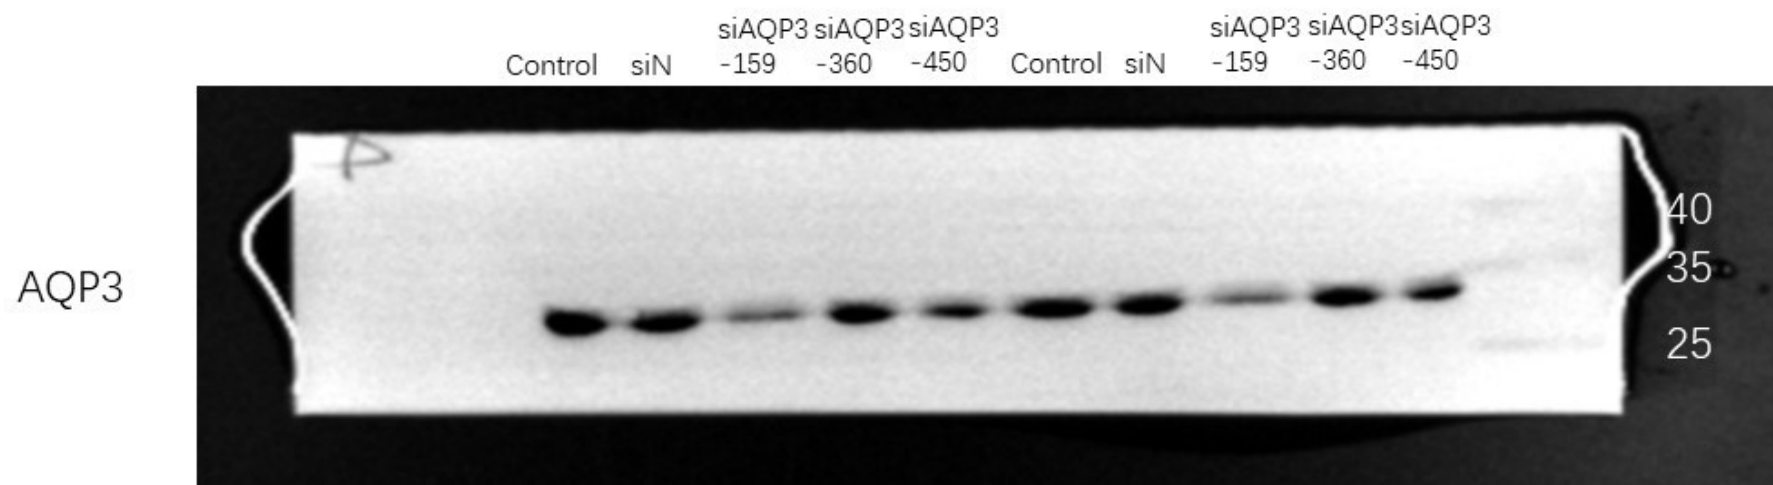

Supplement: d1fo00586c11.pdf [file d1fo00586c11.pdf]

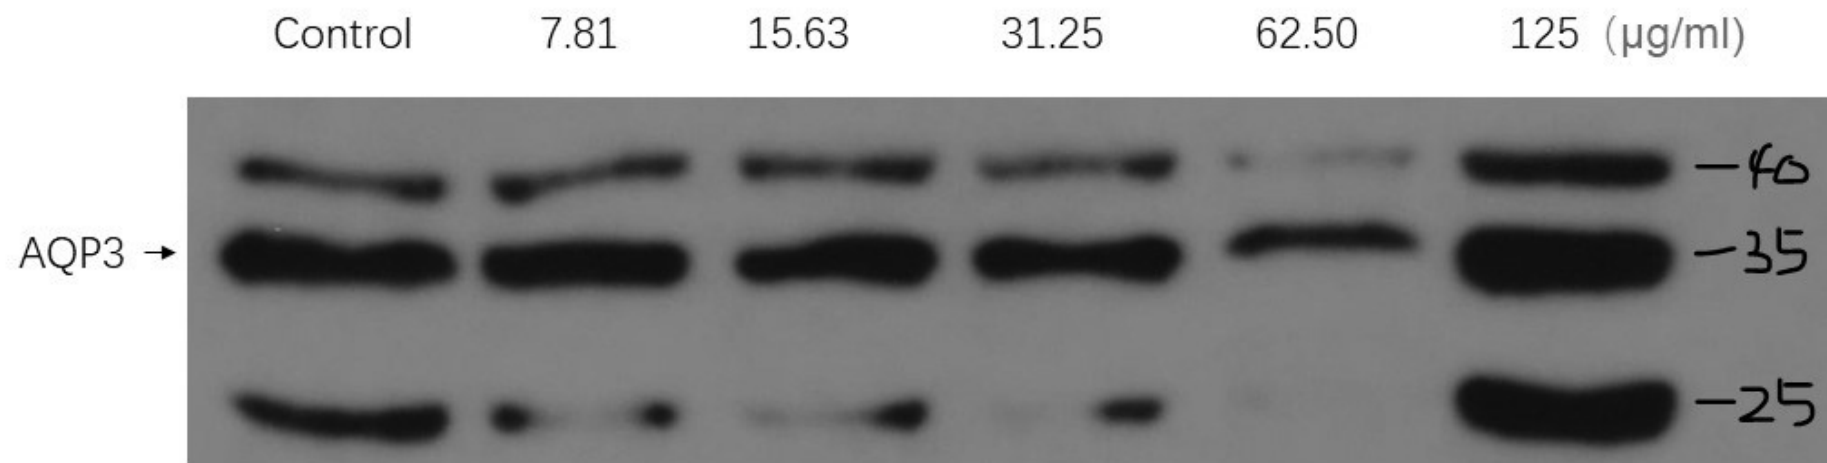

Supplement: d1fo00586c12.pdf [file d1fo00586c12.pdf]

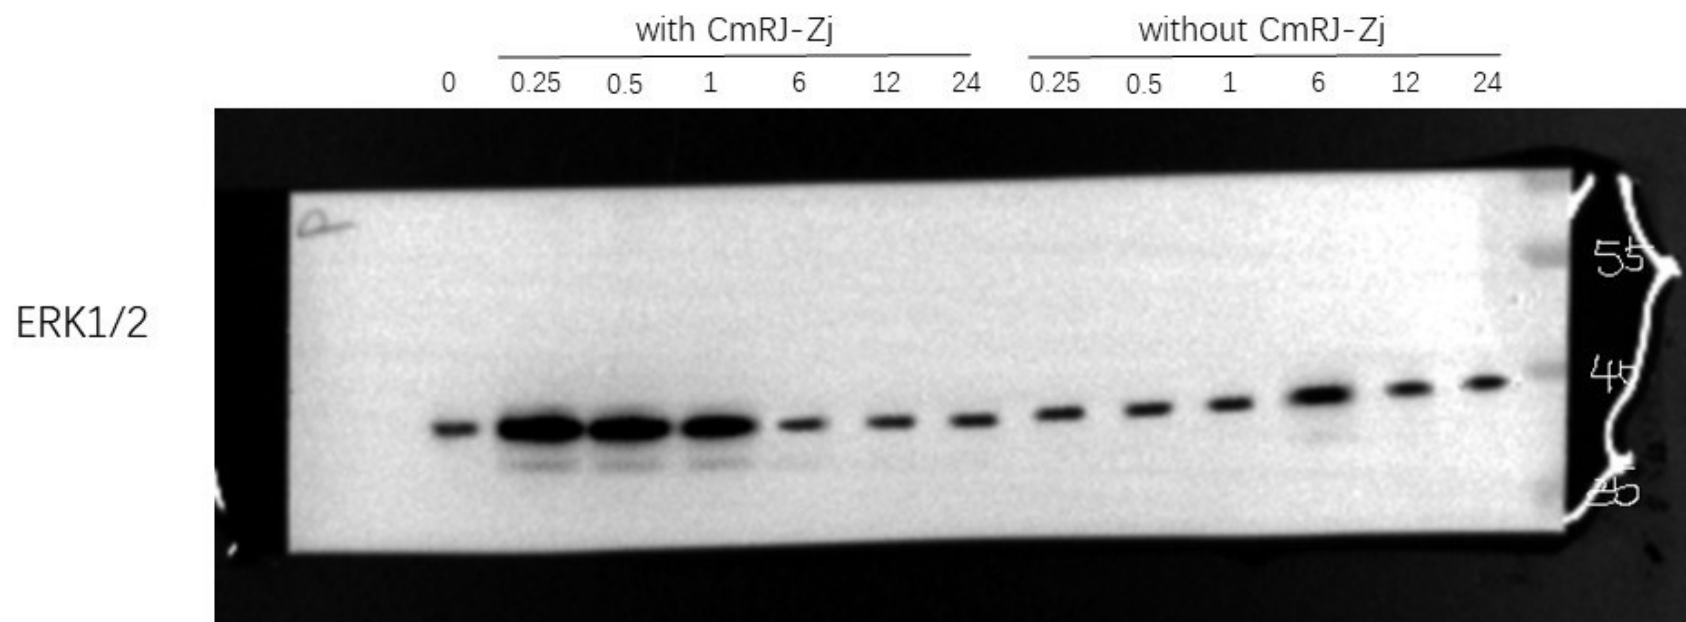

Supplement: d1fo00586c13.pdf [file d1fo00586c13.pdf]

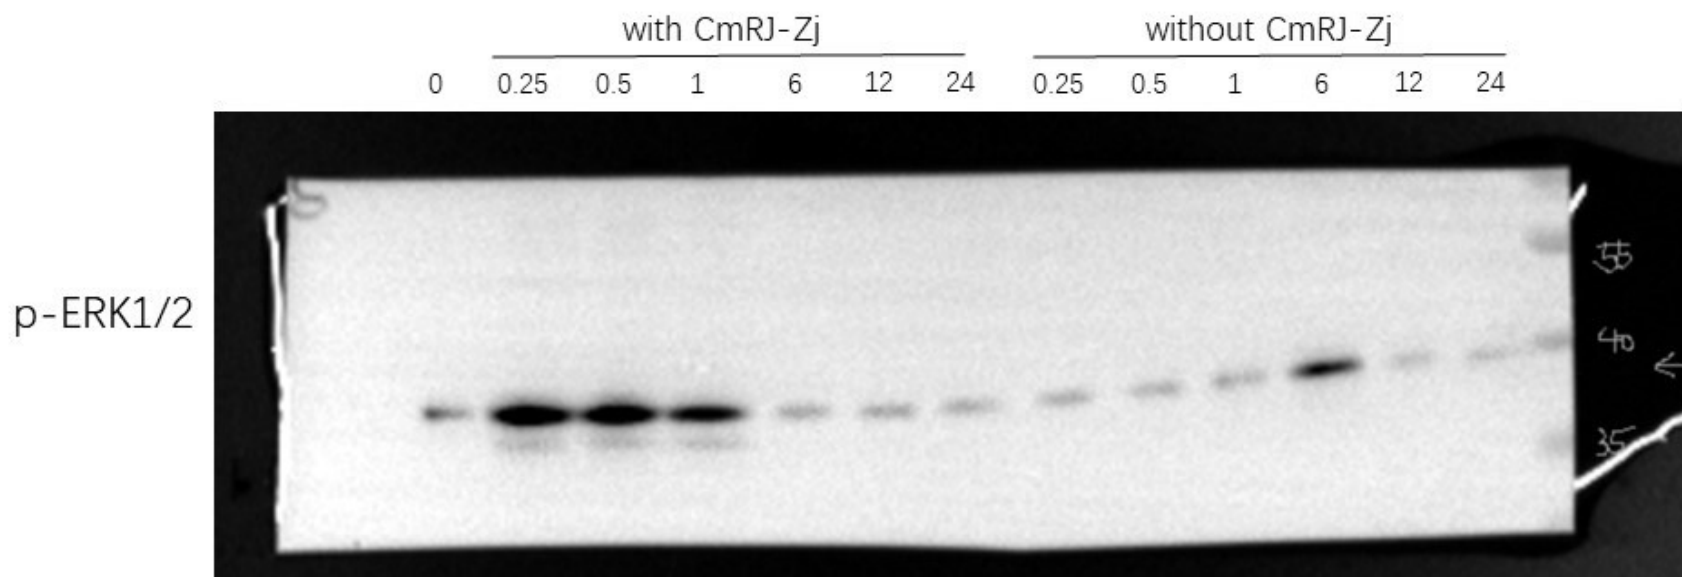

Supplement: d1fo00586c14.pdf [file d1fo00586c14.pdf]

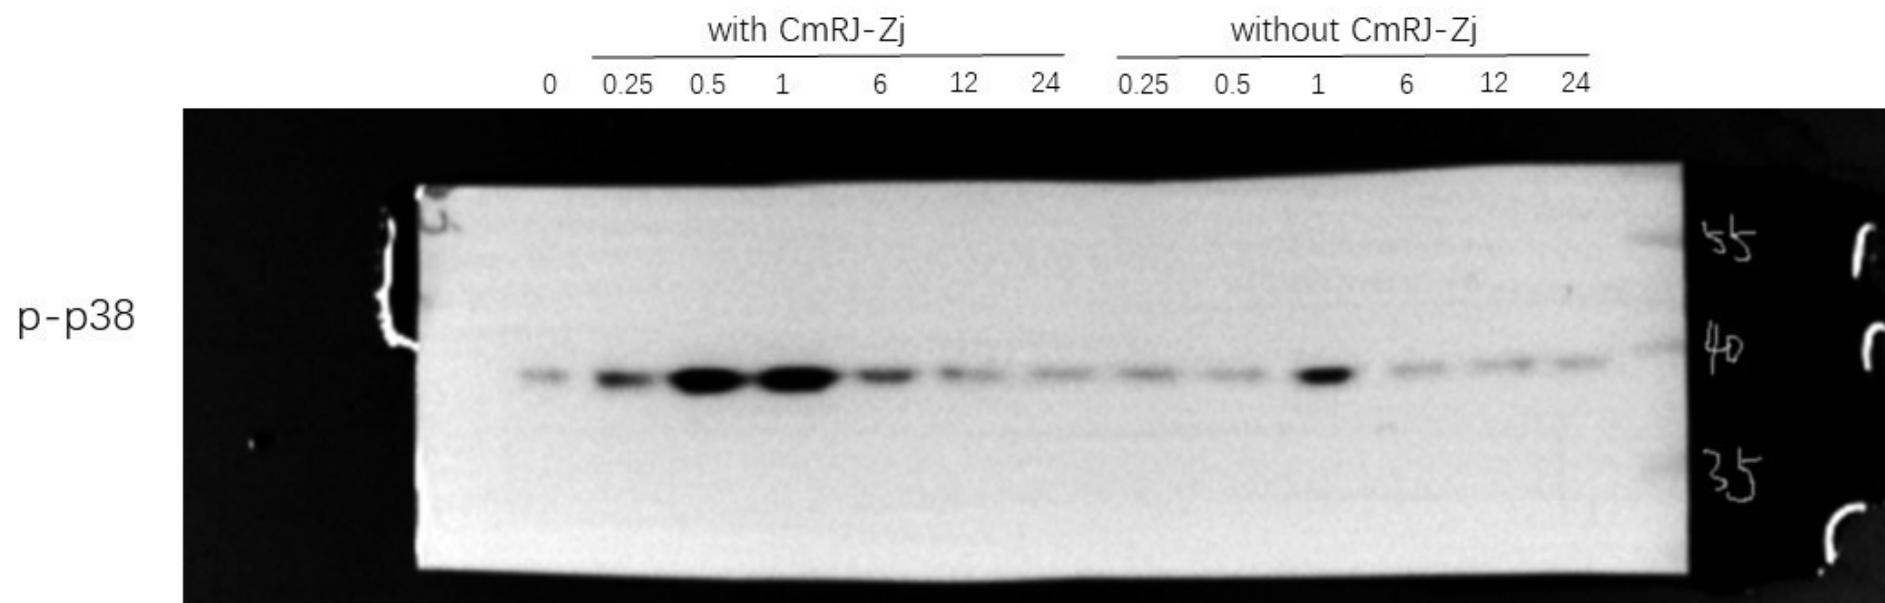

Supplement: d1fo00586c15.pdf [file d1fo00586c15.pdf]

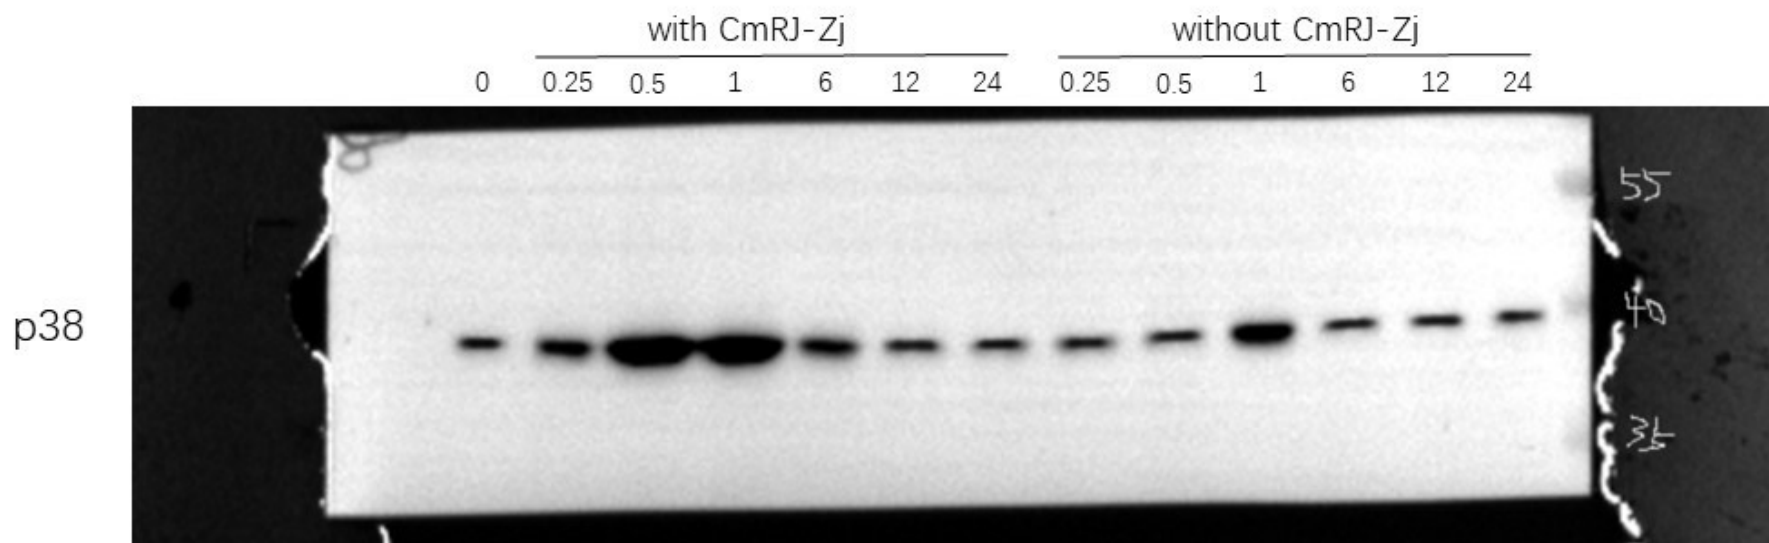

Supplement: d1fo00586c16.pdf [file d1fo00586c16.pdf]

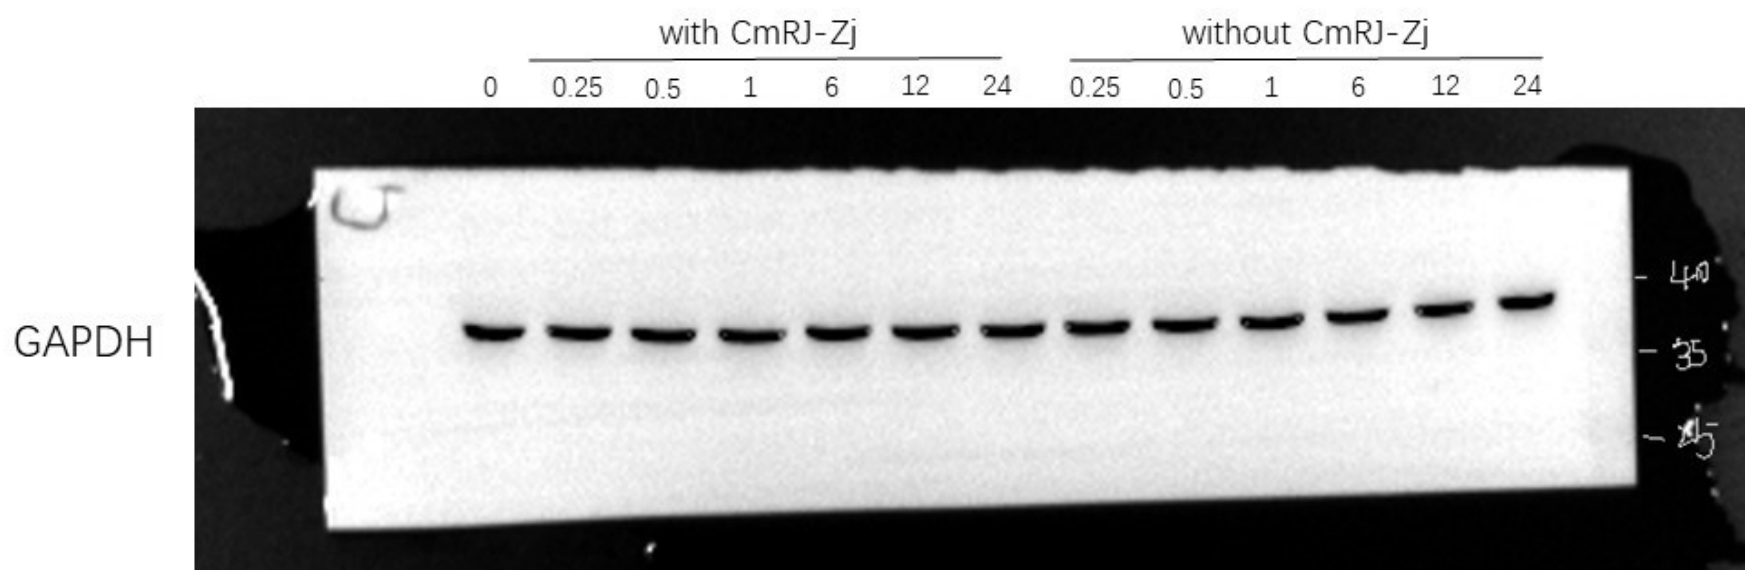

Supplement: d1fo00586c17.pdf [file d1fo00586c17.pdf]

A

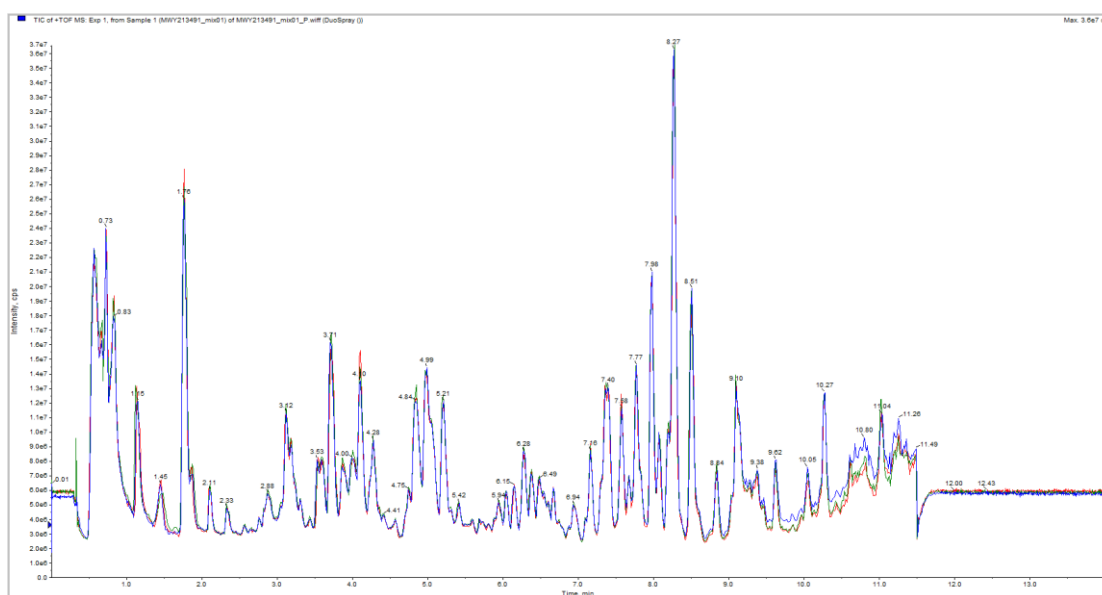

B

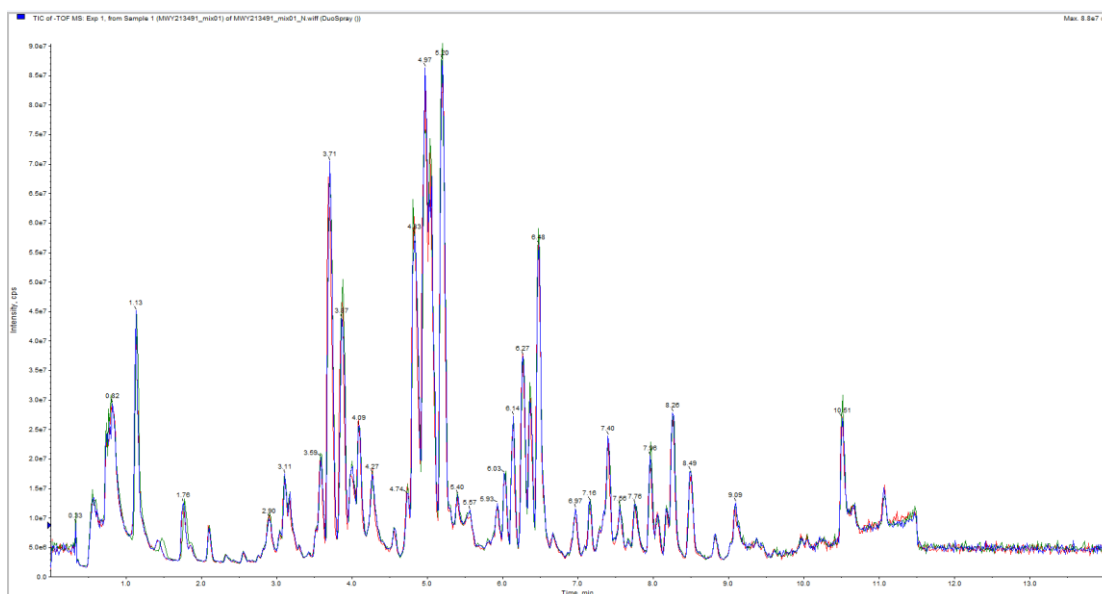

**Figure S2:** Overlaid chromatogram of QC injection in positive ion mode (A) and negative ion mode (B).

Supplement: d1fo00586c2.pdf [file d1fo00586c2.pdf]

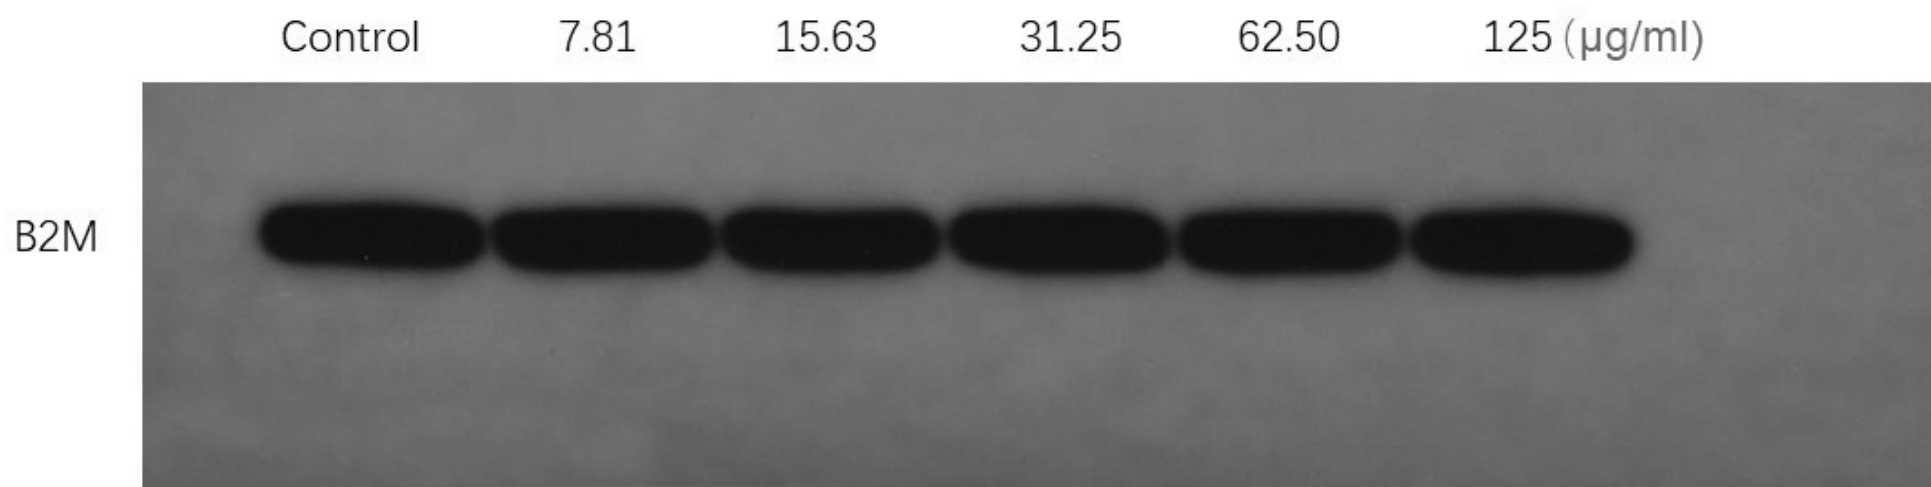

Supplement: d1fo00586c9.pdf [file d1fo00586c9.pdf]
